# Supplementary material for: Scaled, high fidelity electrophysiological, morphological, and transcriptomic cell characterization
Source: eLife. 2021 Aug 13;10:e65482. doi: 10.7554/eLife.65482 (PMC8428855; doi:10.7554/eLife.65482)
Supplement: Figure 3—figure supplement 4—source data 2. [file elife-65482-fig3-figsupp4-data2.csv]

specimen_id	input_resistance	tau	v_baseline	sag_nearest_minus_100	ap_1_peak_v_short_square	ap_1_upstroke_downstroke_ratio_short_square	ap_1_width_short_square	driver	dataset
850845697	227.7812063694	0.0277932936897665	-62.90147194495568	0.1523250043392181	51.74374771118164	2.2294736666266246	0.0006599999999999	Sst-IRES-Cre	MET
730734599	142.4998790025711	0.0102391160485374	-74.1437507042518	0.0432646982371807	5.900000095367432	1.5777887676874562	0.0003999999999999	Pvalb-IRES-Cre	MET
706265097	203.90623807907104	0.0153253666831081	-63.76542351462624	0.2243741303682327	30.36079788208008	1.7870877907519749	0.000470909090909	Sst-IRES-Cre	MET
796696588	256.56262040138245	0.0116526944168622	-72.26066665649414	0.0909934341907501	38.32500457763672	3.472480217630224	0.0006199999999999	Vip-IRES-Cre	MET
760315920	263.4374499320984	0.0279005130568451	-62.82157373428345	0.1228615418076515	47.243751525878906	2.279239215373252	0.0005	Sst-IRES-Cre	MET
817176599	162.06257045269012	0.0125879278670985	-65.22248776753743	0.0240790080279111	40.78749847412109	1.6425817165619694	0.0003799999999999	Sst-IRES-Cre	MET
760995868	145.51131427288055	0.0167693117063445	-70.58836059570312	0.020420454442501	19.181251525878903	1.6249347512869678	0.00042	Sst-IRES-Cre	MET
657661984	160.78108549118042	0.0102789529619867	-74.18759155273438	0.057318702340126	30.6875	2.1418378295183764	0.0004466666666666	Sst-IRES-Cre	MET
756604961	103.2814010977745	0.0055632005326416	-69.79175662994385	0.0099715581163764	29.924999237060547	1.2855580852104038	0.0002599999999999	Pvalb-IRES-Cre	MET
731349026	137.03131675720215	0.0087759870107517	-61.77188841501872	0.0260267108678817	30.53125190734864	1.4628286755759563	0.00043	Pvalb-IRES-Cre	MET
714932261	299.53113198280334	0.0240484306332614	-54.95041614108615	0.0351675488054752	21.125	3.478529350500696	0.0008919999999999	Vip-IRES-Cre	MET
710098982	396.406352519989	0.0153165008667048	-67.68337885538737	0.0659361779689788	17.700000762939453	3.4965668900735394	0.00064	Vip-IRES-Cre	MET
718643242	219.5313572883606	0.0200196251449841	-67.08496856689453	0.2880451679229736	40.1171875	1.8291150364812483	0.0004849999999999	Sst-IRES-Cre	MET
648011821	321.24999165534973	0.0131714850827778	-59.91378229314631	0.0447367317974567	48.0625	3.385768969294547	0.0008166666666666	Vip-IRES-Cre	MET
707297335	161.87496483325958	0.0155269443814025	-71.11339915882458	0.1670652031898498	25.57291603088379	2.1178384078691943	0.0005333333333333	Sst-IRES-Cre	MET
837115961	123.06251376867294	0.0084322798800686	-62.09718010642312	0.0150600373744964	28.36250114440918	1.417979737926818	0.0003199999999999	Pvalb-IRES-Cre	MET
703963200	234.99999940395355	0.0225999582791382	-61.77294158935547	0.0622615851461887	52.51041793823242	2.3645024795713296	0.0005533333333333	Sst-IRES-Cre	MET
839524416	180.71883916854856	0.0201048457070421	-68.53461990356445	0.0462284907698631	28.931251525878903	2.3441647844677047	0.0005899999999999	Sst-IRES-Cre	MET
704012357	174.84374344348907	0.0119372541429941	-77.54909133911133	0.0940677225589752	14.762499809265137	1.9177329630651527	0.0004679999999999	Sst-IRES-Cre	MET
750821449	354.37485575675964	0.0277620557907738	-70.21170722113715	0.0778589099645614	22.92500305175781	1.8621448010688173	0.0006399999999999	Sst-IRES-Cre	MET
807649362	135.5624794960022	0.0143156300252566	-59.95085105895996	0.1524751633405685	31.934375762939453	1.712882948169333	0.0003999999999999	Sst-IRES-Cre	MET
718798931	242.3437386751175	0.0286175224095261	-73.90523592631023	0.0851274728775024	36.75	2.1046188885037056	0.0007499999999999	Sst-IRES-Cre	MET
844931163	227.71865129470825	0.0144588828670076	-69.89986627752131	0.1263403594493866	41.49687194824219	3.1686630959909943	0.00052	Vip-IRES-Cre	MET
341442651	66.5624216199	0.00486130934391	-82.1176757812	0.0791119262576	12.3999996185	1.40916963736	0.00028	Pvalb-IRES-Cre	ME
818757727	73.43738526105881	0.0063909548654876	-71.96061096191406	0.0554441474378109	18.19375228881836	1.6598120491381767	0.0004199999999999	Pvalb-IRES-Cre	MET
485245025	95.7814082503	0.00615363636564	-68.7008666992	0.060103058815	18.5750007629	1.43245535645	0.000335	Pvalb-IRES-Cre	ME
321708130	103.75007242	0.00637447540632	-81.0082702637	0.0313009656966	13.09375	1.58079055923	0.000428333333333	Pvalb-IRES-Cre	ME
647102565	97.34363108873367	0.0067580534361913	-65.07397930438702	0.030483404174447	26.29687690734864	1.4374321740971916	0.00038	Pvalb-IRES-Cre	MET
696115308	135.6249898672104	0.011141708710112	-72.5935676574707	0.1180144920945167	38.47265768051148	2.964583046270468	0.0005075	Vip-IRES-Cre	MET
682156144	185.15624105930328	0.0102088281900157	-67.85776727849787	0.036438874900341	29.9921875	3.3806187463948545	0.0007299999999999	Vip-IRES-Cre	MET
679649396	237.0312064886093	0.0086552397782374	-66.6087106068929	0.0150564005598425	25.58333396911621	3.051803780963327	0.0007133333333333	Vip-IRES-Cre	MET
750805111	207.6560854911804	0.0198128725571519	-71.10578494601779	0.042484063655138	12.887499809265137	1.9547987502365616	0.00056	Sst-IRES-Cre	MET
762519671	228.35233807563785	0.012456231536233	-75.49321746826172	0.0818099454045295	19.768749237060547	2.980366311136604	0.0006399999999999	Vip-IRES-Cre	MET
706289784	197.81242311000824	0.0182279157603681	-70.75731936368075	0.2117073684930801	22.73958396911621	2.0090707635489484	0.0005399999999999	Sst-IRES-Cre	MET
765853817	38.59378024935722	0.041795066277222	-70.21126937866211	0.0533787608146667	14.231250762939451	1.5945848446004274	0.00038	Pvalb-IRES-Cre	MET
470581375	189.06250596	0.0228931618626	-74.3197021484	0.11237899214	35.8937492371	2.7052080263	0.000607	Sst-IRES-Cre	ME
738680960	214.374914765358	0.0126209881561678	-77.75636969672308	0.0580168664455413	35.14999771118164	3.625359801612185	0.00058	Vip-IRES-Cre	MET
807305345	306.9852888584137	0.0304916155306981	-70.52729936079545	0.0285110156983137	33.181251525878906	2.24724144762481	0.00046	Sst-IRES-Cre	MET
718217349	146.40609920024872	0.0129604093120838	-70.64810250022195	0.0922104641795158	22.0625	1.9799672156211388	0.0004833333333333	Sst-IRES-Cre	MET
646553735	121.64054811000824	0.0068998396245687	-60.16400933265686	0.0424814522266387	20.557292302449543	1.4435034284130843	0.00034	Pvalb-IRES-Cre	MET
569720969	107.656396925	0.00707704572264	-71.8832778931	0.00734988739714	24.7062492371	1.34118799623	0.000292	Pvalb-IRES-Cre	ME
741908619	365.78118801116943	0.0243566970309852	-74.26276736789279	0.124870441854	27.241668701171875	2.1239547529400444	0.0006266666666666	Sst-IRES-Cre	MET
761397389	235.15643179416656	0.0094259897643034	-74.4582733154297	0.013326721265912	29.05624961853028	2.9228110465504016	0.00072	Vip-IRES-Cre	MET
829227158	157.78106451034546	0.0116772407524285	-73.93813858032226	0.1012011021375656	38.11250305175781	2.732183285484964	0.00046	Vip-IRES-Cre	MET
747028632	437.6230537891388	0.0460506496311322	-62.02654051780701	0.0739818885922432	40.31250381469727	2.2058665965067865	0.00068	Sst-IRES-Cre	MET
674185371	69.60945576429367	0.0087642007578629	-62.75330028533936	0.0422893539071083	23.018749237060547	1.5226681700682752	0.000356	Pvalb-IRES-Cre	MET
469614747	105.156324804	0.00515544793836	-77.0609664917	0.0372542142868	17.7749996185	1.40589312661	0.000342	Pvalb-IRES-Cre	ME
648085661	140.46886563301086	0.0086501254563021	-69.22385279337566	0.0448548719286918	33.468753814697266	3.568554030026146	0.0007299999999998	Vip-IRES-Cre	MET
705765534	271.09384536743164	0.0321747756586131	-63.307305653889976	0.1447440981864929	29.09375190734864	3.080364555645124	0.00092	Sst-IRES-Cre	MET
772726951	206.28675818443293	0.0228122445226085	-60.93466790517172	0.2104035764932632	37.48125076293945	2.153232215740779	0.00058	Sst-IRES-Cre	MET
741785767	191.40642881393435	0.0188410764313921	-72.8849983215332	0.0458275824785232	34.35625076293945	2.14524320372391	0.0005199999999999	Sst-IRES-Cre	MET
328876201	157.031223178	0.0164098067561	-57.8922042847	0.0105121107772	33.4010429382	2.35711962323	0.0007225	Sst-IRES-Cre	ME
705593515	83.43745768070221	0.0050995086829321	-74.78640073888442	0.0192046780139207	27.77343940734864	1.5174948888632995	0.00036	Sst-IRES-Cre	MET
666222765	76.71871036291122	0.0080670384797478	-72.10265766490589	0.0260755829513072	23.1875	1.611940427904127	0.0003399999999998	Pvalb-IRES-Cre	MET
727851191	276.09390020370483	0.0444241831949996	-60.52837944030762	0.0395578071475029	36.79999923706055	2.495568530514404	0.00064	Sst-IRES-Cre	MET
859848890	298.6491918563843	0.0182741749481137	-64.427704674857	0.0179464817047119	2.237499952316284	2.1211351613129925	0.0007733333333333	Sst-IRES-Cre	MET
720355516	119.37487870454788	0.0089347488850505	-64.53131466820126	0.0822185426950454	34.041666666666664	1.3874445394477863	0.0003133333333333	Pvalb-IRES-Cre	MET
849592508	233.2904040813446	0.0204169716248803	-71.76236915588379	0.1194437369704246	39.09375	2.29207333927913	0.0006199999999999	Sst-IRES-Cre	MET
649388220	72.96870648860931	0.0054371873688525	-74.33826392037528	0.0514954514801502	25.16666603088379	1.7254614559940575	0.0003866666666666	Pvalb-IRES-Cre	MET
476741830	328.906267881	0.0332265643021	-76.1264419556	0.0241032354534	33.90625	1.51111168559	0.0003	Sst-IRES-Cre	ME
760037576	232.1874499320984	0.0129605016356532	-62.34135341644287	0.0292509943246841	33.70625305175781	3.889060071427563	0.00092	Vip-IRES-Cre	MET
760013002	238.2810413837433	0.0268601455616667	-65.05587959289551	0.0818254053592681	30.212501525878903	2.2171164219957986	0.00058	Sst-IRES-Cre	MET
692068557	329.0623426437378	0.0274008210416658	-63.95865249633789	0.1842205226421356	22.91666603088379	1.7840652914137949	0.0006533333333333	Sst-IRES-Cre	MET
760029391	147.18741178512573	0.0158571069048696	-75.40260791778564	0.0631787478923797	25.462501525878903	1.8968285253024284	0.00054	Sst-IRES-Cre	MET
818741456	328.4061253070832	0.0292712941069241	-60.37051550547282	0.0390465594828128	27.928125381469727	2.054262439967492	0.0006233333333333	Sst-IRES-Cre	MET
626082009	318.7499940395355	0.0224220892394714	-64.44202688465948	0.0496508777141571	25.09821483067104	1.8007566882042385	0.0006828571428571	Sst-IRES-Cre	MET
520347870	232.410728931	0.011944694462	-72.4755554199	0.13549926877	32.0187492371	2.47558381256	0.000416	Vip-IRES-Cre	ME
571867358	97.5000336766	0.00699617395113	-74.7878875732	0.0467215515673	27.8062496185	1.36154715737	0.000352	Pvalb-IRES-Cre	ME
759955697	188.6874735355377	0.0174679891938204	-76.9624092795632	0.0332701206207275	34.7084846496582	2.4412914892658177	0.0005271428571428	Sst-IRES-Cre	MET
850845944	292.5550937652588	0.0333316139902842	-64.2743512471517	0.0864568427205085	20.45892906188965	2.372141013817113	0.0007399999999999	Sst-IRES-Cre	MET
906715385	321.1250603199005	0.0158937143704307	-58.600500424702965	0.0616605207324028	37.44374847412109	3.1781285494649647	0.00052	Vip-IRES-Cre	MET
682402048	106.5625697374344	0.0065274939718844	-73.00847524007162	0.0341848991811275	25.72321510314941	1.6752817663640265	0.0003257142857142	Pvalb-IRES-Cre	MET
766591236	243.74999105930328	0.0326151125127254	-66.95878516303168	0.0959823057055473	36.83125305175781	2.306909913262727	0.00068	Sst-IRES-Cre	MET
780026116	286.0000431537628	0.0201109450044894	-72.12103271484375	0.0633092820644378	43.11041259765625	2.907742623952766	0.0005066666666666	Vip-IRES-Cre	MET
711229703	319.84373927116394	0.0389801985275217	-75.49283272879464	0.04611486941576	26.671875	1.9626891937576805	0.000485	Sst-IRES-Cre	MET
803602696	232.61713981628412	0.0220338393363406	-73.7414063673753	0.2266635447740554	32.437503814697266	1.9185053437571449	0.00052	Sst-IRES-Cre	MET
722821387	217.34370291233063	0.0216145144201953	-68.58785629272461	0.2699567675590515	42.20535659790039	2.015389374117248	0.0004799999999999	Sst-IRES-Cre	MET
886317334	102.64412313699722	0.0071827705268848	-70.13900687477805	0.0158661119639873	26.770313262939453	1.3819051083959608	0.00031	Pvalb-IRES-Cre	MET
678641945	347.8126525878906	0.0194754578949356	-55.77823143005371	0.0467716827988624	36.625	4.0495956525369685	0.00078	Vip-IRES-Cre	MET
751288601	224.99999403953552	0.0095088126064139	-73.98026360405817	0.073820099234581	32.06875228881836	1.7003170181278306	0.0003999999999999	Sst-IRES-Cre	MET
778223898	150.9999781847	0.0102949129673909	-69.8726707458496	0.0754995644092559	26.68750190734864	3.117732305707621	0.0007299999999999	Vip-IRES-Cre	MET
703660316	258.12503695487976	0.0239060803284319	-67.24805619981554	0.1739436239004135	39.625	1.8774560731057488	0.0005400000000002	Sst-IRES-Cre	MET
740278557	131.4060091972351	0.0147570382812941	-71.50622844696045	0.1013134270906448	6.200000762939453	1.922056598210576	0.00058	Sst-IRES-Cre	MET
649666842	221.40635550022125	0.0105536772897919	-58.57841936747233	0.0067548137158155	33.265625	3.2040248794550625	0.0007399999999999	Vip-IRES-Cre	MET
780001568	225.62499344348907	0.0109874418486249	-62.60776405334472	0.0336907804012298	12.687500953674316	2.959476119103131	0.00104	Vip-IRES-Cre	MET
683483424	259.3749463558197	0.0128685059685347	-70.33236618041992	0.0466881357133388	41.59375381469727	3.2534808918117992	0.00078	Vip-IRES-Cre	MET
330154280	197.968780994	0.00870448360221	-72.2550735474	0.121957555413	4.73958349228	1.49448179527	0.000331666666667	Pvalb-IRES-Cre	ME
682131764	262.0312571525574	0.0150297740608813	-69.66503482394748	0.012717074714601	7.359375	2.6722866594236776	0.0009666666666666	Vip-IRES-Cre	MET
778150197	272.1275985240936	0.0186727617152518	-74.38696497136897	0.2015465795993805	16.13749885559082	2.0271978924042457	0.00078	Sst-IRES-Cre	MET
570081589	119.843751192	0.00717937879648	-78.4376983643	0.0165866687894	31.1000022888	1.53484434132	0.000376	Pvalb-IRES-Cre	ME
759537975	332.1874439716339	0.0168168030174473	-65.49199337429471	0.073786437511444	32.76875305175781	3.497129795976829	0.00079	Vip-IRES-Cre	MET
847741240	113.00002783536912	0.0120355523841046	-59.46973991394043	0.0271838810294866	32.375	1.6091344899068472	0.0004199999999999	Sst-IRES-Cre	MET
704422207	210.93738079071045	0.0187063730641196	-64.78558869795366	0.2151896804571151	29.137500762939453	1.6743828842005442	0.000576	Sst-IRES-Cre	MET
817996096	86.37489378452301	0.0061629660972222	-72.95192947387696	0.0231221038848161	14.43125057220459	1.6337702417474251	0.00038	Pvalb-IRES-Cre	MET
728523077	93.90624612569808	0.0110259094965248	-59.42082214355469	0.1988320350646972	54.712501525878906	2.013162432359123	0.0004519999999999	Sst-IRES-Cre	MET
741835082	174.06253516674042	0.0169062378269061	-67.15603446960449	0.0625289604067802	26.118751525878903	1.6559337522637674	0.0004799999999999	Sst-IRES-Cre	MET
710230349	147.81253039836884	0.0100367562911271	-64.36368064880371	0.0256811287254095	40.96875	3.2454788036453657	0.00078	Vip-IRES-Cre	MET
830931279	208.2811743021012	0.0144834846859791	-66.59419597278942	0.1174560189247131	36.60625076293945	2.8143140420595603	0.0004999999999999	Vip-IRES-Cre	MET
778101072	228.5157144069672	0.0156988575953694	-75.24307632446289	0.0352243930101394	0.581250011920929	1.9324728611305744	0.00059	Sst-IRES-Cre	MET
794870097	217.677503824234	0.0175642654952071	-71.94736679740573	0.0036677622701972	1.377840876579285	3.09753999968213	0.0005799999999999	Sst-IRES-Cre	MET
671547731	60.78124791383743	0.0041398344185899	-69.51328713553292	0.0221761986613273	22.0625	1.583643284410979	0.0003199999999999	Pvalb-IRES-Cre	MET
713957719	178.28136682510376	0.0111218284791811	-59.5135866800944	0.0389771237969398	42.91249847412109	4.784994911487379	0.0007479999999999	Vip-IRES-Cre	MET
591626585	261.160582304	0.0152385113739	-63.3739509583	0.0372144579887	40.5758934021	2.97898598143	0.000617142857143	Vip-IRES-Cre	ME
836583770	114.62512612342834	0.007669926439639	-71.07412490844726	0.0446907244622707	16.537500381469727	1.492958072218623	0.00036	Pvalb-IRES-Cre	MET
488497498	70.1562091708	0.00556261064063	-75.812461853	0.0517433509231	25.1687507629	1.49434311463	0.000285	Pvalb-IRES-Cre	ME
718872930	98.74999523162842	0.0058881227097518	-80.90219020843506	0.050977811217308	9.234375	1.6834265006126057	0.00038	Pvalb-IRES-Cre	MET
704086371	137.96885311603546	0.0297407524481679	-62.2574094136556	0.0807218253612518	34.53125	1.925817357285178	0.0004600000000001	Sst-IRES-Cre	MET
892445034	107.37483948469162	0.0060030424120348	-70.37510299682617	0.0223825965076684	25.28125	1.3508215677147326	0.00034	Pvalb-IRES-Cre	MET
819552620	334.478497505188	0.0284136308168017	-76.69519564979954	0.099914900958538	26.81250190734864	2.0802736460965114	0.00056	Sst-IRES-Cre	MET
764748151	89.2646461725235	0.0061337903251001	-68.05515416463216	0.0075546852312982	35.587501525878906	1.3835818910808535	0.0003199999999999	Pvalb-IRES-Cre	MET
656990595	258.90621542930603	0.0117972235997083	-71.749951171875	0.1057542786002159	44.6875	3.923552846807687	0.00056	Vip-IRES-Cre	MET
772129158	168.1893765926361	0.0113195926148292	-59.94023236361417	0.0604145526885986	31.33749961853028	1.8030238012845865	0.0004399999999999	Sst-IRES-Cre	MET
849535368	147.36847579479218	0.0205394931069517	-60.18627724280724	0.1569566875696182	34.915279388427734	2.1179219952438	0.0005999999999999	Sst-IRES-Cre	MET
788349328	117.56255477666856	0.0150637998438459	-72.3663200378418	0.0815948545932769	20.01249885559082	1.902753106155697	0.00048	Sst-IRES-Cre	MET
759939473	239.9999499320984	0.0260030597490281	-67.31391143798828	0.2591539025306701	43.71562576293945	2.657737418763181	0.0006199999999999	Sst-IRES-Cre	MET
741187985	127.96878814697266	0.0134216337655143	-72.0017614364624	0.0752853825688362	18.75625228881836	1.600252001042412	0.0004199999999999	Sst-IRES-Cre	MET
478716304	232.187509537	0.0166182059752	-71.7542190552	0.111068345606	20.5208339691	1.67728840339	0.000433333333333	Sst-IRES-Cre	ME
683958677	65.0000348687172	0.0048981428788895	-69.06585778130426	0.0162234548479318	40.40625381469727	1.5439287306227572	0.00032	Pvalb-IRES-Cre	MET
726950294	442.6562488079071	0.0189089889258973	-70.17978350321452	0.1643301248550415	30.33680534362793	1.89508803571428	0.0006711111111111	Sst-IRES-Cre	MET
845578646	121.18743360042572	0.0078999011628179	-69.9309949874878	0.0421824753284454	24.162500381469727	1.4322510564527318	0.00038	Pvalb-IRES-Cre	MET
703283610	118.90628188848495	0.0102737520266243	-70.67062911987304	0.145202487707138	31.18229103088379	1.72714964524731	0.0004866666666666	Sst-IRES-Cre	MET
648094111	167.49998927116394	0.0141582685724686	-66.05144839816623	0.3030708134174347	37.98749923706055	2.7399412926674973	0.0004599999999999	Vip-IRES-Cre	MET
704012705	156.71879053115845	0.0185283602553842	-67.78216409683228	0.0457594841718673	38.484375	1.5874565128276588	0.000455	Sst-IRES-Cre	MET
753861026	240.1561588048935	0.0275348521535592	-60.27147054672241	0.1411365866661071	13.42500114440918	2.1615181134411685	0.0009	Sst-IRES-Cre	MET
647102882	185.46882271766663	0.0096212602337155	-60.11247634887695	0.0157146379351615	21.484375	1.4301236272614437	0.0003166666666666	Pvalb-IRES-Cre	MET
754508194	99.68718886375429	0.0065071291591693	-69.49808756510417	0.0150907188653945	27.712501525878903	1.2263436355306443	0.00028	Pvalb-IRES-Cre	MET
700105125	207.9687863588333	0.0174445967302827	-69.61976051330566	0.082939475774765	35.625	1.5126022021968235	0.0005199999999999	Sst-IRES-Cre	MET
844104102	308.06243419647217	0.0150625641070611	-63.124249091515175	0.2140218764543533	29.31875228881836	2.9356922110327384	0.0005399999999999	Vip-IRES-Cre	MET
716759465	304.84384298324585	0.0174253624841905	-65.92090377807617	0.0902143493294715	35.912498474121094	2.754865023446804	0.0005599999999999	Vip-IRES-Cre	MET
678519215	318.59371066093445	0.0122994410649975	-69.16998454502651	0.0326878242194652	21.12500190734864	2.929670137332587	0.0008399999999999	Vip-IRES-Cre	MET
722821551	188.593864440918	0.0255646335479191	-73.76994269234794	0.088614821434021	29.602678298950195	2.633402695482787	0.0006742857142856	Sst-IRES-Cre	MET
727163311	183.75015258789065	0.0093083632458966	-73.49128799438476	0.1807568669319152	26.35000228881836	1.422979697871421	0.000324	Sst-IRES-Cre	MET
573948335	114.843711257	0.00597648560872	-70.5525054932	0.0192434620112	17.3958339691	1.46293897406	0.00032	Pvalb-IRES-Cre	ME
663183797	144.5312798023224	0.0085378663080987	-78.24227714538574	0.0431218147277832	13.742188453674316	1.831348198749141	0.0005699999999999	Pvalb-IRES-Cre	MET
817996215	29.050741344690323	0.0085742535951834	-67.34458567301432	0.0967763289809227	33.29375457763672	1.448010872893033	0.0003599999999999	Pvalb-IRES-Cre	MET
637321656	197.1354484558105	0.0124440440792389	-60.197062492370605	0.0794835910201072	33.5885435740153	2.4893981745862668	0.0004166666666666	Vip-IRES-Cre	MET
646873528	127.96878814697266	0.0061947442624119	-72.26506118774414	0.0409286804497242	16.515625	1.4418899960878635	0.0003199999999998	Pvalb-IRES-Cre	MET
657859005	205.3125351667404	0.0199415189948877	-67.28498967488606	0.1665849387645721	39.625	1.9766827702338408	0.0005199999999998	Sst-IRES-Cre	MET
806658494	130.656436085701	0.0127913333307504	-67.32936604817708	0.048770934343338	34.74374771118164	1.7501054779553171	0.0004399999999999	Sst-IRES-Cre	MET
481018305	67.9086819291	0.00850227701008	-76.3146133423	0.0338015183806	33.6500015259	1.31881641886	0.000279	Pvalb-IRES-Cre	ME
741188037	308.90634655952454	0.0436706718992868	-65.45057614644368	0.0223539173603057	19.096250534057617	2.15154187589713	0.000784	Sst-IRES-Cre	MET
674144712	107.4998453259468	0.0086346975353575	-79.66145375569661	0.0054126642644405	18.02678666796003	1.4385589458407504	0.0003342857142856	Pvalb-IRES-Cre	MET
722895311	130.78120350837708	0.0080668638173577	-72.11177964643998	0.0080818692222237	22.8125	1.436960610173378	0.0003239999999999	Pvalb-IRES-Cre	MET
688382422	86.25011146068573	0.0064323827697779	-79.56857344683479	-0.0071285031735897	13.4375	1.8817636914075568	0.0004649999999999	Pvalb-IRES-Cre	MET
703267286	219.6875661611557	0.0134093047273338	-71.64097239176432	0.0893098637461662	33.531253814697266	2.5193598643716384	0.0004666666666666	Vip-IRES-Cre	MET
711770582	152.03113853931427	0.0218477694902308	-66.75834104749892	0.0959971994161605	25.114585876464844	1.8633119122382071	0.00042	Sst-IRES-Cre	MET
809034199	93.18533539772034	0.0161468787071278	-67.09417585893111	0.0326860547065734	29.74062728881836	1.5456370719963686	0.0003499999999999	Sst-IRES-Cre	MET
762757594	86.87514811754227	0.0052879035761426	-70.37933519151476	0.0220379009842872	21.79732322692871	1.5698986704521172	0.0003314285714285	Pvalb-IRES-Cre	MET
805642715	327.71867513656616	0.017958004404903	-65.03939125754617	0.0652078986167907	21.506250381469727	2.018337717310464	0.0004933333333333	Sst-IRES-Cre	MET
649249243	102.34370827674866	0.0072714670509588	-74.3580389583812	0.0201868936419487	20.50000190734864	1.8002252731708257	0.0003933333333333	Pvalb-IRES-Cre	MET
759931358	376.2217164039612	0.0132332077747988	-62.96065266927084	0.1264337450265884	41.11874771118164	1.93945122590048	0.00048	Sst-IRES-Cre	MET
751288807	195.6249177455902	0.0177000324959554	-59.81836366653442	0.0544749423861503	23.934659957885746	2.1290549388572773	0.00056	Sst-IRES-Cre	MET
762520044	243.57950687408447	0.0162891558873733	-69.54039649963379	0.1128453612327575	23.86250305175781	3.160563952951214	0.0005599999999999	Vip-IRES-Cre	MET
581403121	88.9063626528	0.00835227093703	-59.9836845398	0.0290720332414	16.96875	1.40090912272	0.0003575	Pvalb-IRES-Cre	ME
753721844	249.3751347064972	0.0193369385884225	-59.74880515204536	0.0446894913911819	21.28541755676269	2.2273944061788256	0.0005666666666666	Sst-IRES-Cre	MET
818635254	384.21884179115295	0.0210425005088124	-60.63262252807617	0.082773208618164	11.08750057220459	1.550085671166005	0.0005249999999999	Sst-IRES-Cre	MET
692044280	281.25	0.0155937478242777	-74.33476028442382	0.1858267486095428	27.662501525878906	2.0789362873782973	0.0004839999999999	Sst-IRES-Cre	MET
660660732	256.56238198280334	0.0262610357457236	-70.13399921764027	0.1813458055257797	30.67968940734864	1.879641090008124	0.000585	Sst-IRES-Cre	MET
797753852	197.31242954730988	0.0110261171224904	-70.77404491717999	0.0837880447506904	32.906253814697266	3.2883849531221	0.00064	Vip-IRES-Cre	MET
772506111	381.6015720367432	0.0399746625485948	-67.91393988473075	0.1553801745176315	19.46875	2.1665237377485345	0.0006733333333333	Sst-IRES-Cre	MET
670343682	73.90616834163666	0.0071118917012539	-72.87354583740235	0.0517120920121669	29.51562690734864	1.7293524172876158	0.0003799999999999	Pvalb-IRES-Cre	MET
637919747	77.60413736104965	0.0077574361519024	-71.89075799890466	0.0994182899594307	29.348960876464844	1.787985593515515	0.0004466666666666	Pvalb-IRES-Cre	MET
718873091	67.49999523162842	0.0077016044179746	-71.79500172932943	0.0430432818830013	20.77499961853028	1.5729791428407836	0.00036	Pvalb-IRES-Cre	MET
570589704	228.906214237	0.0117007610185	-72.9958953857	0.0470192059875	47.2812538147	2.86815045131	0.000588	Vip-IRES-Cre	ME
718643723	188.9062076807022	0.0200302634099031	-63.13014672019265	0.1348160356283188	25.29464340209961	1.5752290647090172	0.0006142857142857	Sst-IRES-Cre	MET
779731467	244.9999898672104	0.0226287012566845	-65.12899169921874	0.0919543877243995	8.543750762939453	2.043651477902277	0.0006099999999999	Sst-IRES-Cre	MET
667476495	166.40624403953552	0.0190282188667577	-67.69467544555664	0.2369555979967117	39.01562881469727	2.680834954615945	0.0006899999999998	Sst-IRES-Cre	MET
766591503	167.5001084804535	0.0102375601100949	-77.22162055969238	0.0304218512028455	14.365625381469728	1.5390758493945962	0.0004399999999999	Sst-IRES-Cre	MET
738468369	310.31283736228943	0.0129545449001724	-70.17859172821045	0.0512471199035644	26.94062614440918	3.1821802508166623	0.00067	Vip-IRES-Cre	MET
703267355	177.49984562397003	0.0132417641042328	-73.59085845947266	0.032554592937231	26.68750136239188	1.4864330008145494	0.0004514285714285	Sst-IRES-Cre	MET
831988252	154.1346311569214	0.0112752606491457	-80.45325415475028	0.1280279606580734	38.18437194824219	2.757983337166139	0.00056	Vip-IRES-Cre	MET
703275551	164.0625	0.0124796968924521	-72.4548094007704	0.0715099796652793	26.28125	1.8548090833392263	0.0004999999999999	Sst-IRES-Cre	MET
695927327	200.31245052814484	0.0146137967939704	-72.97561730278863	0.1348365843296051	21.20535659790039	1.9966390441401327	0.0005999999999999	Sst-IRES-Cre	MET
674521636	227.49999165534973	0.0197974602131893	-63.30317133123224	0.2089140117168426	39.41666793823242	2.0485352905382137	0.0005533333333332	Sst-IRES-Cre	MET
535708196	287.343800068	0.0202893066296	-69.8161087036	0.155002474785	35.3541679382	1.86110792567	0.000446666666667	Vip-IRES-Cre	ME
760988201	201.0934799909592	0.0099264074579869	-69.95926189422607	0.080946460366249	8.475000381469727	1.871254409052892	0.0007199999999999	Sst-IRES-Cre	MET
656859689	221.8751013278961	0.0121208759880569	-67.23661677042644	0.0627387687563896	28.890625	2.898970898481566	0.0004999999999999	Vip-IRES-Cre	MET
488677942	111.874997616	0.00910332083654	-76.9611740112	0.0565723031759	28.3187503815	1.79659024882	0.000388	Sst-IRES-Cre	ME
727204412	132.18753039836884	0.008595978880755	-71.7621841430664	0.084710381925106	34.56250190734863	1.3111612671458204	0.00038	Sst-IRES-Cre	MET
772735561	201.781302690506	0.0289010429432992	-66.65234146118163	0.1498310416936874	41.61597442626953	2.120532553905796	0.0005377777777777	Sst-IRES-Cre	MET
831201867	249.93743002414703	0.0182891911782656	-64.77174250284831	0.2506148815155029	36.48749923706055	2.6354002132505387	0.0004999999999999	Vip-IRES-Cre	MET
758112844	207.656279206276	0.0149589276377561	-70.40243784586589	0.1852935552597046	23.987499237060547	2.4922098791615657	0.0004	Vip-IRES-Cre	MET
653795917	368.59381198883057	0.0206153739236413	-62.42827463150024	0.1208206266164779	27.28125	3.721595411693439	0.00078	Vip-IRES-Cre	MET
766026327	125.93765556812286	0.0074979396313956	-71.23663330078125	0.322027325630188	33.35625457763672	1.4708398336785782	0.00036	Pvalb-IRES-Cre	MET
665576025	185.468852519989	0.0260887517921937	-69.62399851481119	0.0077535971067845	38.48437881469727	2.2311248250659195	0.00064	Sst-IRES-Cre	MET
647103067	127.49992311000824	0.0070888092600767	-69.63409893329327	0.0547256059944629	31.45833396911621	1.4866834012067442	0.00034	Pvalb-IRES-Cre	MET
716718684	314.0626847743988	0.0164457281336306	-69.99423458701686	0.1631126254796981	18.625	3.3705899301011257	0.00062	Vip-IRES-Cre	MET
843407967	103.0624732375145	0.0076761759177504	-64.71780950372869	0.0617366395890712	34.17499923706055	1.7178844814694492	0.0004199999999999	Pvalb-IRES-Cre	MET
772596323	312.6560747623444	0.0250383457532237	-63.94328384399414	0.0277632232755422	35.78750228881836	2.2502302018520006	0.0005799999999999	Sst-IRES-Cre	MET
510706277	98.7500399351	0.005322844739	-74.0376586914	0.00865867640823	26.0781269073	1.32713588172	0.00029	Pvalb-IRES-Cre	ME
741204588	97.03120589256288	0.0066931702471337	-75.213621351454	0.0364127345383167	22.825000762939453	1.486833101234618	0.00036	Sst-IRES-Cre	MET
727204460	171.2498813867569	0.0159476833793678	-77.69312763214111	0.2120654284954071	36.6875	2.753512007527423	0.0005933333333333	Sst-IRES-Cre	MET
623813235	277.2134840488434	0.0171441412277881	-64.61246853783017	0.0023563348222523	25.73958396911621	2.258991163612684	0.0004844444444443	Sst-IRES-Cre	MET
488440436	149.062544107	0.00809240760817	-73.0082244873	0.0552238002419	27.0520839691	1.82278078939	0.00048	Pvalb-IRES-Cre	ME
750748277	154.68749403953552	0.0108114356705605	-71.94757270812988	0.0331159830093383	38.90937423706055	1.8064653142265072	0.00045	Sst-IRES-Cre	MET
834552438	190.30046463012687	0.0129358965594335	-72.17973454793294	0.0143376737833023	31.637500762939453	2.0479027077072125	0.00046	Sst-IRES-Cre	MET
817169015	211.78315579891205	0.0375631659744911	-50.39333490224985	0.0122877592220902	41.46250534057617	1.7196408910501058	0.0005799999999999	Sst-IRES-Cre	MET
754729595	187.1875673532486	0.0188298779850927	-73.17708032781428	0.0317846126854419	58.375	2.335582144233955	0.0007	Sst-IRES-Cre	MET
636854912	163.28133642673492	0.0114724378215658	-66.54952161065464	0.045715969055891	36.49218845367432	1.756939959971588	0.0004075	Sst-IRES-Cre	MET
736887426	220.15628218650812	0.0114855262213472	-63.72956085205078	0.1703842431306839	29.743751525878903	2.223935638277762	0.0003999999999999	Vip-IRES-Cre	MET
760849029	357.96868801116943	0.0436716962473995	-61.546387892503006	0.0938200876116752	19.150001525878903	1.9802772627735377	0.0007879999999999	Sst-IRES-Cre	MET
485048967	36.562461406	0.00389183574784	-77.0860366821	0.0477078333497	25.7749996185	1.16193521864	0.000255	Pvalb-IRES-Cre	ME
700334729	273.59384298324585	0.0226750788792741	-65.74585723876953	0.2826231718063354	32.28125	1.963799823239748	0.0004599999999999	Sst-IRES-Cre	MET
844989066	111.78134381771088	0.0074278336259464	-72.733754938299	0.0617975182831287	33.16250228881836	1.4700788825762503	0.00036	Pvalb-IRES-Cre	MET
731300491	81.09389990568161	0.0044447021770699	-84.95750920912799	0.0113931838423013	16.9765625	1.4963319947129743	0.000425	Pvalb-IRES-Cre	MET
806658697	253.6948025226593	0.0282968013768343	-71.66182916814631	0.1652324646711349	19.49374961853028	1.8743004989050152	0.0005199999999999	Sst-IRES-Cre	MET
759530125	276.40628814697266	0.0187262187495439	-76.27526378631592	0.0803253501653671	19.48375129699707	3.6072781420333726	0.000716	Vip-IRES-Cre	MET
807633551	270.4972326755524	0.024946958346739	-67.84818796011118	0.0346789099276065	33.756248474121094	1.6928090501993696	0.00054	Sst-IRES-Cre	MET
761791119	203.59382033348083	0.0140496339862376	-70.10259323120117	0.1094362437725067	35.765625	2.8665678077131043	0.00045	Vip-IRES-Cre	MET
807641749	168.00010204315186	0.0075279358091605	-65.85187530517578	0.0581029579043388	25.900001525878903	1.663044027934508	0.0004399999999999	Sst-IRES-Cre	MET
750346902	240.62517285346985	0.0240473260944733	-62.11154327392578	0.0223774928599596	33.16874694824219	1.8676360302749848	0.00066	Sst-IRES-Cre	MET
759726741	192.03147292137143	0.0201089589586573	-63.5378303527832	0.0306897405534982	21.40625190734864	2.0806521328816023	0.00058	Sst-IRES-Cre	MET
324493977	185.93749404	0.0185812640541	-71.8150482178	0.115165926516	24.25	1.6511191513	0.00039375	Sst-IRES-Cre	ME
648004256	220.15613317489624	0.0124793370299837	-55.889709048801	0.0361686423420906	37.993751525878906	3.086907072260179	0.0010039999999999	Vip-IRES-Cre	MET
718135969	181.7187517881393	0.0159679101215475	-75.66343765258789	0.1438826322555542	28.08333396911621	2.021169148194264	0.00052	Sst-IRES-Cre	MET
819864229	244.3750351667404	0.0207741570694512	-62.50263907692649	0.0323429442942142	33.42499923706055	1.923811185801412	0.0005399999999999	Sst-IRES-Cre	MET
696124071	292.96875	0.0143759824500821	-70.26178359985352	0.0804574862122535	36.14583206176758	4.053077332038853	0.0006566666666666	Vip-IRES-Cre	MET
886882985	89.43744748830795	0.0069264527248288	-70.04740360804966	0.0100105768069624	29.376564025878903	1.4535880184073504	0.000325	Pvalb-IRES-Cre	MET
679903913	496.0938394069672	0.0221243950379149	-65.00290934244792	0.1790753453969955	-0.03125	1.85463052608224	0.0005399999999999	Sst-IRES-Cre	MET
710738613	213.4375274181366	0.0252867790440939	-69.97914777483258	0.0900990515947341	20.52083396911621	1.9273529622395515	0.0005266666666666	Sst-IRES-Cre	MET
706159288	131.718710064888	0.0181364271569872	-73.04834261807528	0.0349105261266231	20.265625	2.186846866515263	0.0005299999999999	Sst-IRES-Cre	MET
705585853	175.62511563301086	0.0115406109781186	-69.14843292236328	0.0541555173695087	30.012500762939453	2.204170757092816	0.0004999999999999	Sst-IRES-Cre	MET
788980414	308.27265977859497	0.0225131859687029	-69.25780487060547	0.1948145627975464	33.04375076293945	2.372573582628095	0.0005275	Vip-IRES-Cre	MET
836584127	67.81253963708878	0.00530333047805	-75.42171325683594	0.0210757236927747	25.431251525878903	1.495779882515742	0.0003599999999999	Pvalb-IRES-Cre	MET
570098371	130.937501788	0.009196842119	-70.6496047974	0.0390215031803	17.0260429382	1.49673626054	0.00036	Pvalb-IRES-Cre	ME
753722052	173.7499237060547	0.0145289198877614	-74.0837272644043	0.0694459304213523	33.55000305175781	1.8610639042996413	0.00048	Sst-IRES-Cre	MET
601506507	222.9165732860565	0.0116886793409493	-73.26687177022298	0.0133077129721641	37.04166793823242	3.034696785577814	0.00069	Vip-IRES-Cre	MET
718136012	228.1249612569809	0.0235823928599285	-68.42366027832031	0.0907247737050056	19.05624961853028	2.059588837560172	0.00074	Sst-IRES-Cre	MET
697795277	66.56251847743988	0.0051063345862925	-65.67422828674316	0.0772781670093536	35.25000228881836	1.4411981049997244	0.000316	Pvalb-IRES-Cre	MET
823681740	81.9023922085762	0.0067462123992753	-67.51567459106445	0.0233656447380781	25.66874885559082	2.621064222349724	0.0007	Pvalb-IRES-Cre	MET
806822616	275.62499046325684	0.0227278333479597	-71.1169059753418	0.1237332075834274	35.3125	1.984360265806791	0.0006	Sst-IRES-Cre	MET
741098201	141.09362661838531	0.0124199562889245	-74.46990373399522	0.0370222330093383	31.12500190734864	1.509087241034014	0.0003999999999999	Sst-IRES-Cre	MET
825221851	140.5121684074402	0.0085751737654978	-73.9105658531189	0.025968512520194	29.075000762939453	1.3602814564250938	0.00038	Pvalb-IRES-Cre	MET
646570718	77.96870917081833	0.0093776176273591	-65.33380937576294	0.011553494259715	0.2812499801317851	1.5290859889751127	0.00036	Pvalb-IRES-Cre	MET
807641823	145.4060673713684	0.0124190179906704	-75.28026719526811	0.016283493489027	19.109375	1.8997316666786523	0.0004899999999999	Sst-IRES-Cre	MET
582632160	179.151684046	0.00839444391413	-71.5257568359	0.0266469102353	38.5416679382	2.93315001755	0.000533333333333	Vip-IRES-Cre	ME
388874977	192.187696695	0.0111700650538	-68.9970245361	0.085567086935	14.671875	2.011465058	0.00050875	Sst-IRES-Cre	ME
569991910	101.249925792	0.00771363941038	-77.7479858398	0.0541863441467	18.8802089691	1.19118417666	0.0003	Pvalb-IRES-Cre	ME
682492648	201.2499868869781	0.0106967152969183	-61.68066533406576	0.0038523133844137	23.43750190734864	1.666915354067859	0.00038	Pvalb-IRES-Cre	MET
759948010	164.53132033348083	0.0171759178055389	-66.98343849182129	0.0065938490442931	29.025001525878903	1.8422986184779493	0.0005	Sst-IRES-Cre	MET
485630699	113.749966025	0.00630159694059	-79.1717605591	0.05627226457	15.6484375	1.66232940197	0.0003525	Pvalb-IRES-Cre	ME
754549487	376.2498795986176	0.0331921190882981	-55.67207374572754	0.0514788776636123	49.540626525878906	1.9223258409312884	0.000635	Sst-IRES-Cre	MET
757080816	490.2343451976776	0.0344195844417032	-71.39473295211792	0.0620880722999572	9.837499618530272	1.740613656981429	0.0009	Sst-IRES-Cre	MET
570589935	208.59375596	0.00914225412485	-74.8398513794	0.0525475107133	33.3645820618	3.07716236621	0.00074	Vip-IRES-Cre	ME
906724091	162.96885907649994	0.0100334238395675	-72.25647888183593	0.0686074718832969	36.212501525878906	3.048828814423501	0.00056	Vip-IRES-Cre	MET
661267198	233.43753814697263	0.0124339543461757	-66.65375137329102	0.0491248629987239	36.44196319580078	3.973063258665472	0.0007342857142857	Vip-IRES-Cre	MET
648323841	226.7187088727951	0.018557791070534	-53.44672944810655	0.0238884519785642	34.359375	4.62865331669793	0.0009199999999999	Vip-IRES-Cre	MET
740885249	414.6876335144043	0.0251560782740916	-70.44774627685547	0.0062960255891084	7.483333587646484	2.21269197243963	0.0005866666666666	Sst-IRES-Cre	MET
820945667	254.89306449890137	0.0278105742423399	-56.24566593170166	0.0550184287130832	27.918750762939453	1.9382463603689504	0.00078	Sst-IRES-Cre	MET
572375809	120.468750596	0.00605256939415	-71.9847793579	0.0041641369462	25.6187496185	1.65118610289	0.000372	Pvalb-IRES-Cre	ME
759751429	228.28158736228943	0.0148694141818374	-62.18669815063477	0.1151845827698707	20.54625129699707	2.73965418416325	0.00058	Vip-IRES-Cre	MET
727114502	170.15628516674042	0.0123043958718589	-54.26636075973511	0.2171812504529953	32.29166793823242	1.9423004710480367	0.00042	Sst-IRES-Cre	MET
740819727	277.03094482421875	0.0271285767353444	-72.26200008392334	0.1381888389587402	16.943750381469727	1.621680035187448	0.00056	Sst-IRES-Cre	MET
758154001	222.3438173532486	0.0114655746762684	-67.98571692572699	0.1195029392838478	39.26250457763672	2.68051740549734	0.0003799999999999	Vip-IRES-Cre	MET
803472146	115.12496322393416	0.0116670484266354	-74.78242568969726	0.0605718083679676	30.11874961853028	1.6482977733045916	0.0004199999999999	Sst-IRES-Cre	MET
779731731	300.593763589859	0.0337891800976305	-63.48296203613281	0.1165210455656051	24.92500114440918	2.0381210776006093	0.00064	Sst-IRES-Cre	MET
687907602	392.3437297344208	0.0262383106631851	-60.4747446233576	0.1314485669136047	21.8125	1.621195799193367	0.0006474999999999	Sst-IRES-Cre	MET
710730520	147.81257510185242	0.0113850515074066	-71.16382789611816	0.1160747408866882	11.481249809265137	1.6706971423541197	0.000412	Sst-IRES-Cre	MET
705209114	194.84378397464752	0.0267479674140616	-50.04258117675781	0.1094561293721199	35.368751525878906	2.8314615793179336	0.00074	Sst-IRES-Cre	MET
705217315	194.5311725139618	0.0162242517769748	-49.78505270821707	0.197198212146759	60.32292175292969	2.297731366628691	0.00048	Sst-IRES-Cre	MET
692839208	43.75011473894119	0.0048433353049185	-76.03034820556641	0.0171411447227001	19.56250190734864	1.385891566410185	0.00028	Pvalb-IRES-Cre	MET
741835561	363.7496829032898	0.0259582180425848	-64.28295612335205	0.0796980783343315	10.22499942779541	2.055527442747082	0.0007599999999999	Sst-IRES-Cre	MET
567952169	46.5624220669	0.00444273641927	-79.5200424194	0.0388247482479	24.9500007629	1.29499636885	0.000312	Pvalb-IRES-Cre	ME
679068460	151.7188996076584	0.0097403616440348	-73.67159729003906	0.085472747683525	24.78125095367432	1.9038472966849893	0.0004299999999999	Sst-IRES-Cre	MET
807633708	287.3125374317169	0.0510823401319504	-60.2094245323768	0.0365722030401229	33.17499923706055	1.942962011548684	0.0006999999999999	Sst-IRES-Cre	MET
487359276	102.500036359	0.00535773322002	-70.2407989502	0.125833943486	14.2750015259	1.36539910249	0.000265	Pvalb-IRES-Cre	ME
693232442	241.87499284744263	0.0162986136193488	-69.34395599365234	0.2012479156255722	34.046878814697266	3.246579086185182	0.00058	Vip-IRES-Cre	MET
697795393	125.46870112419128	0.0068583638758006	-75.91781546852805	0.0768144205212593	23.21875	1.4266609604268772	0.0003600000000001	Pvalb-IRES-Cre	MET
718594887	214.53139185905457	0.017540859658134	-69.41690656873915	0.0885468497872352	40.5	2.324981480221856	0.00058	Sst-IRES-Cre	MET
649519945	246.87498807907104	0.013511002318126	-69.59737205505371	0.1800616979598999	38.578125	3.0752637255653887	0.0004999999999999	Vip-IRES-Cre	MET
807527244	174.37495291233063	0.0158067406289126	-68.41528930664063	0.0701380744576454	42.58125305175781	1.8341054526455791	0.0004799999999999	Sst-IRES-Cre	MET
475202388	485.000014305	0.0612703406987	-67.0113143921	0.0322718136013	32.625	2.35634662618	0.000565	Sst-IRES-Cre	ME
842908502	98.3123779296875	0.0098756588148902	-62.05006065368652	0.0737780407071113	37.79374694824219	1.3527400775569958	0.0002899999999999	Pvalb-IRES-Cre	MET
718644056	194.53132152557373	0.0207967842943457	-72.24223882501775	0.1572592407464981	34.64374923706055	1.9956898774737155	0.000468	Sst-IRES-Cre	MET
750789473	201.71870291233063	0.0162320783358032	-69.43260955810547	0.1171140745282173	12.840277671813965	1.924086093724625	0.0006066666666666	Sst-IRES-Cre	MET
720167778	241.40623211860657	0.0173182564622302	-64.60202026367188	0.0281358230859041	8.59375	1.8044616875615889	0.00058	Sst-IRES-Cre	MET
565191521	308.124870062	0.0196750086782	-61.0857658386	0.0411317758262	26.3571434021	3.15621398577	0.000671428571429	Vip-IRES-Cre	ME
341459814	70.624999702	0.00424421599301	-69.8803634644	0.027308665216	5.17500019073	1.1020201149	0.000183	Pvalb-IRES-Cre	ME
750461799	191.71886146068573	0.018200420241986	-70.39853413899739	0.0605469495058059	23.43750190734864	1.8563292407666416	0.00052	Sst-IRES-Cre	MET
759784296	222.9686677455902	0.0189952704909007	-70.04605780707465	0.0517841503024101	27.54374885559082	2.528212664386192	0.00084	Vip-IRES-Cre	MET
665502576	150.62496066093445	0.0162937467818664	-62.213787752039295	0.0588621087372303	26.68750190734864	1.808104830419932	0.0004285714285714	Sst-IRES-Cre	MET
678708083	155.93746304512024	0.0125554149131934	-68.47346954345703	0.0634889602661132	36.3203125	3.3261280734919056	0.0006325	Vip-IRES-Cre	MET
704070516	123.906247317791	0.0071882960547198	-79.85598602294922	0.0635021030902862	23.09375	2.04934899825045	0.0005199999999998	Sst-IRES-Cre	MET
803365751	151.22225880622864	0.0184315987965986	-72.81794808127664	0.1585516631603241	36.38750457763672	1.7929076918689253	0.00048	Sst-IRES-Cre	MET
797664123	207.8952789306641	0.0123154605660138	-62.35504995073591	0.0664507001638412	50.11249923706055	2.6766932287343645	0.0004599999999999	Vip-IRES-Cre	MET
705266559	210.15624701976776	0.0237173885544756	-59.54461754692925	0.0454150103032588	36.00390625	1.9538079167247813	0.00055	Sst-IRES-Cre	MET
750461846	310.238778591156	0.0430597411899005	-50.46638454090465	0.0514357909560203	53.98125076293945	2.570669081736674	0.0006399999999999	Sst-IRES-Cre	MET
759948182	245.1946437358856	0.0330288222805034	-64.04675651999081	0.0322938598692417	1.3908652067184448	2.012303910404408	0.0006723076923076	Sst-IRES-Cre	MET
570098593	235.937640071	0.0121779559329	-72.6972961426	0.0649616196752	37.49609375	3.38498192981	0.00071	Vip-IRES-Cre	ME
750805922	319.8436498641968	0.0319366104788413	-60.47599172592163	0.2078921943902969	27.29166603088379	1.9582075563740453	0.00058	Sst-IRES-Cre	MET
679895974	167.18752682209015	0.0281321533690178	-62.58599548339844	0.0967711806297302	31.62500190734864	2.233348512946066	0.0005000000000001	Sst-IRES-Cre	MET
756499370	303.2028079032898	0.0163163489273181	-68.57572491963704	0.0570782236754894	16.600000381469727	1.871929335950468	0.00062	Sst-IRES-Cre	MET
649667498	177.57804691791534	0.0108570423690132	-68.62700380597796	0.1735991984605789	31.981250762939453	2.424493799764154	0.0005559999999999	Vip-IRES-Cre	MET
565191603	244.374915957	0.013694757793	-71.3902587891	0.0921928361058	39.171875	3.21452303759	0.0007	Vip-IRES-Cre	ME
779879349	221.5626835823059	0.0274265437603019	-63.2801144917806	0.2224085479974746	24.589584350585938	2.0302999417518146	0.0006099999999999	Sst-IRES-Cre	MET
693093302	244.9999898672104	0.0163101959536617	-66.93502946333452	0.0516206361353397	36.61458587646485	2.0751901284587406	0.00058	Sst-IRES-Cre	MET
755393467	153.12480926513672	0.009590729336845	-78.11636267768012	0.0179755575954914	17.9375	1.888563650111447	0.0004799999999999	Pvalb-IRES-Cre	MET
627876797	170.9635704755783	0.0127358448020593	-74.09387803077698	0.2137825638055801	14.0625	1.737721757340851	0.0004249999999999	Sst-IRES-Cre	MET
837084094	210.34373342990875	0.0100744801715222	-64.61959838867188	0.0259825773537158	30.90156555175781	1.722211332120203	0.0003949999999999	Pvalb-IRES-Cre	MET
571311039	117.812536657	0.00910021589457	-68.473777771	0.0635342225432	33.38671875	1.29198423901	0.0003525	Pvalb-IRES-Cre	ME
679633864	284.0626537799835	0.0093221048236674	-61.88916269938151	0.0466683767735958	23.734375	2.967930784296345	0.0005799999999999	Vip-IRES-Cre	MET
736805833	277.8123617172241	0.0152410248773879	-66.59546184539795	0.0127844158560037	32.58437728881836	3.31245878532272	0.00113	Vip-IRES-Cre	MET
697787349	89.84378725290298	0.0061664280617013	-73.34633127848308	0.0335401743650436	29.21875047683716	1.3478226550495542	0.0003	Pvalb-IRES-Cre	MET
693265371	145.31250298023224	0.0110053527965669	-78.14078182644315	0.0539486669003963	23.125	3.085708047263544	0.0006399999999999	Vip-IRES-Cre	MET
627876828	181.90106749534607	0.0200502259076937	-70.86809635162354	0.1725581586360931	30.109375	1.8141053027840244	0.0004519999999999	Sst-IRES-Cre	MET
761832412	81.24999701976776	0.0056503948710801	-74.98208694458008	0.0084907980635762	21.106250762939453	1.5895635442372509	0.0003199999999999	Pvalb-IRES-Cre	MET
486777819	95.4688638449	0.00644876282588	-76.9419403076	0.0669051557779	22.7062492371	1.17020773803	0.000227	Pvalb-IRES-Cre	ME
760832993	167.21592843532562	0.0165007741731639	-77.13106875949435	0.0376535803079605	16.825000762939453	1.8247775051694608	0.0005399999999999	Sst-IRES-Cre	MET
678708195	148.90632033348083	0.0095960243643903	-74.03745621901292	0.164626196026802	23.04166603088379	2.600483610911456	0.0004666666666666	Vip-IRES-Cre	MET
807658468	323.5623836517334	0.0298386127495504	-65.53129425048829	0.0574219934642314	17.73124885559082	2.2725018982869383	0.0006	Sst-IRES-Cre	MET
643007462	411.6072654724121	0.018833541396914	-59.70622525896345	0.0470459945499897	41.12890625	4.246737353973369	0.00081	Vip-IRES-Cre	MET
614728680	87.63017505407333	0.0091080832941186	-69.87754221165434	0.0134559450671076	13.700000381469726	1.349439690220282	0.0002919999999999	Pvalb-IRES-Cre	MET
647103464	90.78136086463928	0.0054803781987143	-63.548269271850586	0.0255145858973264	24.24479103088379	1.2763843115411022	0.0002666666666667	Pvalb-IRES-Cre	MET
752042986	246.87498807907104	0.0371334957827331	-69.04566616482205	0.0517414174973964	38.625	2.297558990734802	0.00048	Sst-IRES-Cre	MET
738042857	262.34376430511475	0.0105013964013258	-66.8722095489502	0.0328473150730133	34.38750457763672	2.8335042472645715	0.0006199999999999	Vip-IRES-Cre	MET
750732265	296.2501347064972	0.0214562140193478	-64.53292732238769	0.0764878988265991	33.45624923706055	2.3522328436699205	0.0006999999999999	Sst-IRES-Cre	MET
772129772	186.03110313415527	0.0224588805215808	-59.48137512207031	0.1932651847600937	22.143749237060547	1.848459167570196	0.00048	Sst-IRES-Cre	MET
679887854	239.21874165534973	0.0163734753054282	-71.37330373128255	0.0343533158302307	28.41666984558105	2.130581625225956	0.0004933333333333	Sst-IRES-Cre	MET
731431918	124.06257539987564	0.0089365760847326	-70.00230759840746	0.0517645440995693	24.50000114440918	1.6052950489331668	0.000384	Pvalb-IRES-Cre	MET
761758704	193.90620291233063	0.0098749037442476	-42.11056726629084	0.0608744472265243	71.9041748046875	4.049279547041793	0.0008066666666666	Vip-IRES-Cre	MET
703570927	215.9375250339508	0.0206531975714688	-68.32052612304688	0.0928597077727317	33.25	1.5038897170619685	0.0003959999999999	Sst-IRES-Cre	MET
704455666	145.46871185302734	0.0224849541163709	-71.46636623806424	0.1592511385679245	22.43750190734864	1.9334743356370576	0.00058	Sst-IRES-Cre	MET
906699758	211.4543467760086	0.0121948185852461	-57.75135116577148	0.1236083731055259	39.087501525878906	3.157302506818253	0.0005	Vip-IRES-Cre	MET
745087987	63.59367072582245	0.0054270463268645	-71.31268310546875	0.0522589609026908	27.42500114440918	1.4468993078170949	0.00032	Pvalb-IRES-Cre	MET
736330755	165.6251847743988	0.0096473506466978	-69.46015357971191	0.0364046357572078	25.48750114440918	3.096180030956365	0.0006399999999999	Vip-IRES-Cre	MET
797680651	276.9060730934143	0.0195924322966724	-55.04328595674955	0.0518767945468425	27.67291831970215	3.633393869653593	0.0008799999999999	Vip-IRES-Cre	MET
807527435	144.7811871767044	0.0103419000292911	-74.00844365900213	0.0549294129014015	45.06875228881836	2.886530983899999	0.00068	Vip-IRES-Cre	MET
803087384	249.71884489059448	0.0227911304136787	-60.5397232055664	0.035233698785305	23.706249237060547	1.807269320079305	0.0006399999999999	Sst-IRES-Cre	MET
567927838	63.7499988079	0.00439721329195	-77.3142623901	0.0550864338875	28.7916660309	1.37600516036	0.000306666666667	Pvalb-IRES-Cre	ME
751199266	463.3480906486511	0.0156975230124307	-68.18396273526278	0.0612984113395214	0.9104166626930236	2.609114729035719	0.0007466666666667	Sst-IRES-Cre	MET
324256803	195.624992251	0.0141976665961	-73.6294403076	0.0780669972301	38.75	1.4500093305	0.00043	Sst-IRES-Cre	ME
647816229	290.78108072280884	0.0192307198703192	-62.3859676361084	0.1134933158755302	8.432291984558105	1.7337554032398004	0.0004866666666666	Sst-IRES-Cre	MET
809059366	72.9375034570694	0.0086871635563996	-62.91869608561198	0.0402712859213352	30.368751525878903	1.5321502510568064	0.00034	Pvalb-IRES-Cre	MET
718177320	165.62515497207642	0.0157224703481403	-75.5098550969904	0.0896823406219482	36.6875	2.0015221692939664	0.0004999999999999	Sst-IRES-Cre	MET
480183339	210.781291127	0.0184457377951	-68.2111129761	0.0397304669023	32.4562492371	1.83929585983	0.000365	Sst-IRES-Cre	ME
396608557	130.625069141	0.00715959664507	-69.9003829956	0.0235784575343	22.0	1.44553586508	0.00034125	Pvalb-IRES-Cre	ME
829195312	198.34372401237488	0.0136291019140171	-67.86575826009114	0.1295776069164276	36.49374771118164	3.25233063761432	0.0005399999999999	Vip-IRES-Cre	MET
739558458	271.09354734420776	0.0123812317108996	-74.04676132202148	0.0409124456346035	23.65625	2.9337426166572182	0.00062	Vip-IRES-Cre	MET
689685563	206.96629115513392	0.0183210765781228	-75.10330708821614	0.1218417435884475	28.09659004211425	2.484325052239402	0.0005654545454545	Sst-IRES-Cre	MET
488440893	109.999999404	0.00554955809776	-74.1160736084	0.0915253385901	19.5249996185	1.23136699597	0.000251	Pvalb-IRES-Cre	ME
715113536	259.8438560962677	0.0123993627716583	-70.08126220703124	0.1763020902872085	35.86979293823242	2.570406773147729	0.0005033333333333	Vip-IRES-Cre	MET
745088065	80.00010997056961	0.0070489402902568	-66.23051071166992	0.0308864787220954	32.71875	1.6106377274320125	0.00036	Pvalb-IRES-Cre	MET
704029761	303.1249940395355	0.0316101047618575	-66.585999806722	0.0934775546193122	36.50000381469727	2.494270061655086	0.00058	Sst-IRES-Cre	MET
665281605	64.68742340803146	0.0047939363527123	-75.05466664632162	0.0758342146873474	27.21875	1.5444349182755577	0.0003466666666667	Pvalb-IRES-Cre	MET
757531718	256.56259059906006	0.017248770690178	-63.199585596720375	0.0880772843956947	36.44791793823242	2.814994730118892	0.0005666666666666	Vip-IRES-Cre	MET
754893893	211.874857544899	0.0305881411091506	-53.21482849121094	0.0057319379411637	40.91666793823242	2.244948915273264	0.0006399999999999	Sst-IRES-Cre	MET
693044296	185.1562112569809	0.0198872391403984	-71.22762362162273	0.0513778440654277	42.65625	2.0553245514374496	0.0005599999999998	Sst-IRES-Cre	MET
956269641	74.74998384714127	0.0067483030075711	-78.401311007413	0.0464090555906295	16.75312614440918	1.3619031024053694	0.0003199999999999	Pvalb-IRES-Cre	MET
803595339	76.0095864534378	0.0060083176696399	-73.55473605069247	0.0203263685107231	25.70625114440918	1.5569726387672047	0.0003666666666667	Sst-IRES-Cre	MET
485639243	63.9061331749	0.00433648202379	-75.3418273926	0.0228347033262	9.18124961853	1.34324284283	0.000276	Pvalb-IRES-Cre	ME
320455763	101.5625	0.00554352591794	-78.3937988281	0.0859844386578	32.125	1.73127402147	0.0004175	Pvalb-IRES-Cre	ME
605160536	409.1146886348725	0.0191526246567566	-65.94090065589317	0.1113249585032463	11.208333015441896	2.8338872086452693	0.00066	Vip-IRES-Cre	MET
728786009	239.68753218650812	0.0186124785780243	-72.1345984141032	0.1088654994964599	37.6875	1.9117982188326568	0.0004599999999999	Sst-IRES-Cre	MET
795608159	250.9686648845673	0.0296549972843419	-67.3047614464393	0.1462615877389907	33.67708206176758	2.275383892237422	0.0006199999999999	Sst-IRES-Cre	MET
803439725	263.9060914516449	0.0178856387099236	-70.32076454162598	0.0234954785555601	14.88437557220459	1.964595944065648	0.00058	Sst-IRES-Cre	MET
844178543	192.5637274980545	0.015594880605437	-65.46154073079427	0.0263360030949115	23.63125228881836	3.0738973685343365	0.0007599999999999	Vip-IRES-Cre	MET
698614902	91.8748453259468	0.0071380989269113	-72.68797302246094	0.0090827392414212	26.07291603088379	1.4421960103586224	0.0003533333333333	Pvalb-IRES-Cre	MET
692470904	244.6876466274261	0.0143780339093381	-72.01016553243001	0.0844804123044014	30.66666984558105	2.4480737159021184	0.0006133333333333	Sst-IRES-Cre	MET
642557052	243.7499612569809	0.0124995757278884	-73.21822684151786	0.0298039093613624	30.25000190734864	3.502937726052872	0.0006399999999999	Vip-IRES-Cre	MET
728122493	78.28128337860107	0.0067512296822262	-68.17870330810547	0.0017125530866906	35.15625	1.664788618393964	0.000388	Sst-IRES-Cre	MET
576046210	226.406246424	0.0122021952427	-71.7957839966	0.0971265807748	46.609375	2.94479731401	0.00053	Vip-IRES-Cre	ME
639018115	319.7915554046631	0.018320568733695	-63.16442489624024	0.0860828310251236	27.9765625	3.409558511363622	0.00065	Vip-IRES-Cre	MET
754795653	130.31253218650818	0.0144767421642271	-63.93217849731445	0.153704285621643	30.978126525878903	2.2284946764940985	0.00056	Sst-IRES-Cre	MET
825222283	152.56255865097046	0.0088171965069542	-68.29062128067017	0.0437804795801639	33.44791793823242	1.308690060365044	0.0003466666666666	Pvalb-IRES-Cre	MET
750724235	264.41481709480286	0.0434766970693538	-72.60547392708915	0.0761394724249839	30.431251525878903	2.855122875759435	0.0006399999999999	Sst-IRES-Cre	MET
679863446	171.32814228534698	0.0246562088093882	-75.95235891903148	0.1054213270545005	30.94791603088379	2.065889259533133	0.0004799999999999	Sst-IRES-Cre	MET
703169690	214.21878039836884	0.0107212802263982	-61.360575612386064	0.0364508554339408	15.364583015441896	1.5402029188284807	0.0004	Sst-IRES-Cre	MET
482444444	64.5312517881	0.00482288038976	-76.9548416138	0.0449956208467	25.0187492371	1.37752586262	0.000301	Pvalb-IRES-Cre	ME
718636190	142.03132688999176	0.0141181669918836	-77.81757909601384	0.0967892035841941	29.1796875	1.660832336271839	0.0005549999999999	Sst-IRES-Cre	MET
908960935	126.75006687641144	0.0084896554677815	-67.27319197221236	0.0220289602875709	28.39375114440918	1.303959791507559	0.0002999999999999	Vip-IRES-Cre	MET
727327912	203.74995470047	0.0204455384840561	-73.79708644321987	0.0314683057367801	39.90625381469727	2.501050179217803	0.0005600000000001	Sst-IRES-Cre	MET
646431913	142.34362542629242	0.0186684920464689	-72.35841512680054	0.1711566597223281	30.45833396911621	2.2962223908410286	0.0005399999999999	Sst-IRES-Cre	MET
754893997	180.1559329032898	0.0090024349347764	-62.40040874481201	0.1743737608194351	33.56875228881836	1.4465139157879576	0.0003599999999999	Sst-IRES-Cre	MET
751183031	109.92173850536346	0.0107500998588593	-68.20031774611701	0.0351816415786743	39.08541870117188	1.5483575725649663	0.0004399999999999	Sst-IRES-Cre	MET
501736631	111.093707383	0.00828939854894	-71.4365234375	0.108885496855	32.1145820618	3.44171680322	0.00064	Vip-IRES-Cre	ME
703972537	328.5938501358032	0.0242998225715422	-66.41994391547308	0.0914497524499893	24.46875	1.8342130722862893	0.00052	Sst-IRES-Cre	MET
579290303	146.562501788	0.00679589981944	-73.9164352417	0.101382933557	25.7124996185	1.30622983632	0.000271	Pvalb-IRES-Cre	ME
832365760	103.26281934976578	0.0074919346222646	-62.32539298317649	0.0518519282341003	42.56562805175781	1.4589561697471725	0.0003299999999999	Pvalb-IRES-Cre	MET
795796672	229.9373596906662	0.0211195907658269	-68.33461622758345	0.1274197399616241	5.077500343322754	1.9064148786249309	0.000516	Sst-IRES-Cre	MET
692651203	170.93734443187714	0.0178443175446276	-63.24040010240343	0.206453189253807	29.43750190734864	1.7306334086215565	0.00052	Sst-IRES-Cre	MET
892536014	87.56263554096222	0.0071377369120346	-60.50641493363814	0.0293410643935203	34.212501525878906	1.4851734371995224	0.0003199999999999	Pvalb-IRES-Cre	MET
669074640	167.49998927116394	0.0199799669783192	-62.729489135742185	0.0867839455604553	25.15625190734864	1.9002445786291084	0.0006599999999998	Sst-IRES-Cre	MET
759440597	301.5534281730652	0.0341087801484275	-61.1063768863678	0.0627149045467376	39.83437728881836	1.794414779669805	0.0004599999999999	Sst-IRES-Cre	MET
745063641	170.3122854232788	0.0064884643456537	-76.21243286132812	0.0574336387217044	34.087501525878906	1.3379472191828825	0.0003499999999999	Pvalb-IRES-Cre	MET
836592858	116.75002425909042	0.0069515924107719	-71.77639171055385	0.0287511777132749	32.150001525878906	1.5141204807159396	0.00038	Pvalb-IRES-Cre	MET
727172315	207.03125	0.0190088615667467	-60.223036448160805	0.0402197763323783	40.237501525878905	2.053746409085909	0.0007919999999999	Sst-IRES-Cre	MET
752067803	219.6874469518661	0.0116323215741889	-69.53213214874268	0.0632713660597801	35.625003814697266	1.5808849746569396	0.00034	Sst-IRES-Cre	MET
705889505	204.0625661611557	0.0193162486002535	-63.98427073160807	0.0897004231810569	33.09375	1.5662349957685815	0.0004799999999999	Sst-IRES-Cre	MET
800318692	118.03100258111954	0.0105205011379186	-69.29635385366586	0.0161462239921093	28.10000228881836	1.687406841249003	0.00042	Sst-IRES-Cre	MET
574399717	105.000033975	0.00733384966598	-66.7315216064	0.00947562232614	21.8812503815	1.39120570767	0.000292	Pvalb-IRES-Cre	ME
808486121	344.2498445510864	0.0216786739676673	-63.21150138161399	0.1910740286111831	2.3499999046325684	2.0273904578670137	0.0008799999999999	Sst-IRES-Cre	MET
657999088	185.46874821186063	0.026022194647131	-64.00844157825817	0.1974516361951828	39.03125381469727	1.9533942976036185	0.0005000000000001	Sst-IRES-Cre	MET
647103728	216.7186737060547	0.0177558403515234	-65.89825083414713	0.100018210709095	32.40625	2.492125279449787	0.00061	Sst-IRES-Cre	MET
657835250	149.2188572883606	0.0127976791918314	-64.22241002863103	0.0929419845342636	18.60416603088379	1.805440827799116	0.0004766666666666	Sst-IRES-Cre	MET
715162865	123.59368801116943	0.0101504358663286	-58.70887978871664	0.2572646737098694	40.35937881469727	3.1528504004023468	0.0006100000000001	Vip-IRES-Cre	MET
851887346	179.34364080429077	0.0163069776463783	-72.17841131036931	0.1276366561651229	25.174999237060547	1.918052828993568	0.0005199999999999	Sst-IRES-Cre	MET
486352114	135.156214237	0.00642065760135	-76.0302352905	0.0549155771732	22.03125	1.60057244845	0.000375	Sst-IRES-Cre	ME
500966656	232.031315565	0.0224069351286	-70.6153488159	0.0807148590684	28.3562507629	1.86344821798	0.00054	Sst-IRES-Cre	ME
737379585	154.84370291233063	0.0116348641821622	-61.66057035658095	0.1319695264101028	43.98750305175781	2.322810430346333	0.0003599999999999	Vip-IRES-Cre	MET
718611725	269.84357833862305	0.0210453271779343	-72.0917579650879	0.1129054650664329	23.6875	2.0769431928027884	0.0006	Sst-IRES-Cre	MET
693085460	219.0626412630081	0.0252586345288562	-61.02024671766493	0.013597042299807	36.9375	2.042706536684358	0.0004599999999999	Sst-IRES-Cre	MET
689636633	157.5000286102295	0.0135814858830286	-69.75274658203125	0.0311960596591234	32.71875267028808	2.06270738895588	0.0005519999999999	Sst-IRES-Cre	MET
758269209	202.3436427116394	0.0105792628717636	-70.18211809794109	0.0294445436447858	14.875	2.780612247502204	0.001	Vip-IRES-Cre	MET
750757147	271.8749940395355	0.0287080515403184	-64.22607845730252	0.0287621337920427	39.78125	1.9834429349503573	0.00056	Sst-IRES-Cre	MET
779879712	199.03117418289185	0.0256191853673682	-70.84997969407301	0.2489912211894989	39.03958257039388	1.778261214939399	0.0004733333333333	Sst-IRES-Cre	MET
687891745	310.15634536743164	0.0196430394871425	-79.56728897094726	0.1784362196922302	34.125	1.7772424468317922	0.0005066666666666	Sst-IRES-Cre	MET
716473635	176.25011503696442	0.0126611428897811	-76.47977447509766	0.0053379656746983	18.633928298950195	2.820540063551991	0.0008142857142857	Vip-IRES-Cre	MET
313861411	135.312616825	0.00682557524538	-68.6992721558	0.0169601105154	21.2395839691	1.59308404621	0.000375	Pvalb-IRES-Cre	ME
479298854	58.5937872529	0.00431266833719	-77.0154495239	0.0542815104127	12.8249998093	1.45379206301	0.000336	Pvalb-IRES-Cre	ME
718054696	72.6560577750206	0.0063796245543178	-72.46670193142361	0.0341169759631156	32.0	1.5776518838769795	0.0004199999999999	Pvalb-IRES-Cre	MET
666141992	59.84378606081009	0.0060534110647105	-74.9745555676912	0.061863999813795	24.04166603088379	1.5760729922937635	0.0004	Pvalb-IRES-Cre	MET
576046388	278.437495232	0.0104254847546	-63.1793899536	0.0188645776361	13.15625	2.57290385319	0.00072	Vip-IRES-Cre	ME
729269557	69.37488168478012	0.0050740559464267	-73.09445524215698	0.0812469199299812	26.58749961853028	1.4464621861824676	0.000336	Sst-IRES-Cre	MET
704759096	203.2812386751175	0.0130878541758284	-63.28141318427192	0.0373301282525062	40.21875	1.6927377181997785	0.0003799999999998	Sst-IRES-Cre	MET
766625082	168.0937111377716	0.0189663528320475	-63.295868682861325	0.0099461693316698	41.984375	1.982165820099039	0.00054	Sst-IRES-Cre	MET
807396668	292.28103160858154	0.0172915517004967	-69.90541017972507	0.2034618407487869	15.696874618530272	2.917582835799408	0.00069	Vip-IRES-Cre	MET
762651966	128.4376084804535	0.0062414767274584	-69.1448471069336	0.0096186716109514	14.05000114440918	1.8249535003060808	0.0004799999999999	Pvalb-IRES-Cre	MET
772121919	114.1875460743904	0.0102889551387227	-57.22267074584961	0.0467987842857837	38.85625457763672	1.5486329935840517	0.00038	Sst-IRES-Cre	MET
695289158	201.8748819828033	0.0161317941204271	-65.66260875355114	0.0670933574438095	44.03125152587891	3.3225428477002525	0.000644	Vip-IRES-Cre	MET
491029832	182.500004768	0.00977356802457	-71.7014846802	0.119770824909	29.2875022888	1.70693600765	0.000436	Sst-IRES-Cre	ME
837141835	76.90627872943878	0.005711147642514	-72.12184143066406	0.3140754103660583	36.57500076293945	1.5396005262803414	0.0003199999999999	Pvalb-IRES-Cre	MET
760071501	291.7839586734772	0.0240431800027203	-71.2205073038737	0.0466547161340713	29.55000114440918	2.133806473498723	0.0004999999999999	Sst-IRES-Cre	MET
786228558	64.6873489022255	0.0049234512491732	-75.2957930131392	0.0192969758063554	24.193750381469727	1.4819614226813314	0.0003	Pvalb-IRES-Cre	MET
807585101	163.2499247789383	0.0229194245572337	-60.15119094848633	0.0163570176810026	47.240631103515625	2.3732520600312728	0.00056	Sst-IRES-Cre	MET
820897104	169.78134214878082	0.0100177112667732	-63.24573794278231	0.0476634725928306	29.931251525878903	1.8199897978777544	0.0004699999999999	Pvalb-IRES-Cre	MET
670066005	116.87500029802322	0.0077019128658548	-72.68468529837472	0.0034710026811808	18.7421875	1.5306577656816802	0.0003649999999999	Pvalb-IRES-Cre	MET
670106972	86.40628308057785	0.0068220949376068	-68.87962826815519	-0.003560560522601	34.5625	1.53680378043453	0.0003599999999999	Pvalb-IRES-Cre	MET
752067932	226.71888768672943	0.0394435523292297	-66.20942115783691	0.0652544647455215	46.60625457763672	2.428317177790228	0.0006	Sst-IRES-Cre	MET
803407199	156.21887147426605	0.0104006627060199	-70.08757400512695	0.0355176664888858	18.734375	1.6112132778943389	0.0004	Sst-IRES-Cre	MET
685729119	94.06249970197678	0.0056253706106804	-66.09465560913085	0.0530896931886673	33.312503814697266	1.3492912583536754	0.0002999999999999	Sst-IRES-Cre	MET
692675937	198.28124344348907	0.0125803089406321	-71.25067952473958	0.2884876728057861	25.078125	2.5021785516938744	0.00048	Vip-IRES-Cre	MET
483083617	292.812526226	0.0268099718287	-69.3377838135	0.156620815396	34.0625	1.64075773688	0.000435	Sst-IRES-Cre	ME
473564515	143.124967813	0.0118075180675	-71.6164169312	0.092290148139	28.7125034332	1.71414760266	0.000393	Sst-IRES-Cre	ME
772121959	176.09363794326782	0.0185403079428875	-74.23510284423828	0.0539765208959579	30.69375228881836	1.915386723123712	0.0006599999999999	Sst-IRES-Cre	MET
750462319	136.8749588727951	0.0108189343876887	-71.1258659362793	0.050082191824913	32.0	1.8291675157713985	0.00038	Sst-IRES-Cre	MET
679028081	235.7813566923141	0.0243320719028586	-65.94196548461915	0.1770876049995422	22.75	1.754141187845347	0.0005299999999999	Sst-IRES-Cre	MET
485287282	251.56250596	0.0228029634147	-65.2991104126	0.00831763353199	17.6187496185	1.86401367038	0.000405	Sst-IRES-Cre	ME
490276212	273.4375	0.0207962029078	-78.4320983887	0.0697836056352	31.015625	2.15954845101	0.0004625	Sst-IRES-Cre	ME
736896373	335.4688584804535	0.015358796783905	-77.38946084415211	0.01894436404109	2.0927083492279053	4.77119502503245	0.0015133333333333	Vip-IRES-Cre	MET
718882166	116.56249314546584	0.0080608177807343	-75.28961854822495	0.036792829632759	29.203125	1.639180084994234	0.00038	Pvalb-IRES-Cre	MET
823960949	134.99996066093445	0.0095491011129611	-62.38262990315755	0.0536822490394115	35.52499771118164	1.4243210289256765	0.00034	Pvalb-IRES-Cre	MET
336676216	100.937500596	0.00503413732	-82.9141769409	0.0239616632462	21.2875003815	1.36182654347	0.000284	Pvalb-IRES-Cre	ME
324257146	245.31249702	0.0159825539742	-72.5818023682	0.0296181812882	40.9937515259	2.13863766089	0.000398	Sst-IRES-Cre	ME
704071039	216.7188972234726	0.0172974920661437	-66.76856104532878	0.1382796615362167	29.13125228881836	1.7656762964256305	0.0004679999999999	Sst-IRES-Cre	MET
656901504	274.37490224838257	0.0174240239704473	-60.229670715332034	0.0289668086916208	14.078125953674316	2.671654685967744	0.0007199999999999	Vip-IRES-Cre	MET
762742145	90.78120440244676	0.0065003353656473	-66.20994415283204	0.0175609216094017	28.54062461853028	1.4916942035892031	0.0003099999999999	Pvalb-IRES-Cre	MET
834602368	196.6467946767807	0.0195735766487878	-60.02206316861239	0.0995234474539756	40.39999771118164	1.8926768266040968	0.0004199999999999	Sst-IRES-Cre	MET
601810307	176.1718988418579	0.0110444454207374	-64.81024417361698	0.2782247364521026	27.22395896911621	1.754844259631393	0.0003633333333333	Sst-IRES-Cre	MET
788325766	183.8125586509705	0.0155720892077565	-68.66248016357422	0.0300736669450998	32.73125457763672	1.9430401408271945	0.0003999999999999	Sst-IRES-Cre	MET
487400838	162.95042634	0.00599169189374	-69.2242050171	0.0376798473299	4.703125	1.31030905841	0.00028125	Pvalb-IRES-Cre	ME
720323976	117.34374612569808	0.009316792312875	-73.06031581333706	0.02927777916193	35.09375	1.614713806467727	0.00038	Pvalb-IRES-Cre	MET
727336328	204.843744635582	0.0185297599389347	-60.82786382039388	0.0847732797265052	30.36458396911621	1.843860440817173	0.0005266666666666	Sst-IRES-Cre	MET
665478543	185.4686290025711	0.0188275619150364	-67.80101089477539	0.0810446739196777	29.69531440734864	2.059344580699872	0.000505	Sst-IRES-Cre	MET
710755730	198.8282650709152	0.0167459109402785	-65.29398727416992	0.1282275766134262	40.47500076293945	1.7715385324557462	0.000428	Sst-IRES-Cre	MET
803620243	282.2500765323639	0.0268176358381802	-66.80063837224787	0.1337099820375442	3.0281248092651367	1.7747995689799825	0.0005499999999999	Sst-IRES-Cre	MET
809649556	58.87498706579208	0.0060140809789042	-75.21203279495239	0.0152260931208729	25.05000114440918	1.7513386340259345	0.0004099999999999	Pvalb-IRES-Cre	MET
759899545	203.7496417760849	0.0177368582892277	-68.41523318820529	0.1935438513755798	32.78125	1.8948142413720777	0.0004999999999999	Sst-IRES-Cre	MET
489719193	51.250115037	0.00421365579133	-76.4303894043	0.0361715331674	34.53125	1.16432221185	0.00023375	Pvalb-IRES-Cre	ME
704284060	287.04044222831726	0.0168067215094083	-55.79454040527344	0.0439922250807285	35.77083969116211	3.730235075487073	0.0007866666666667	Vip-IRES-Cre	MET
313861539	69.062538445	0.00644017222433	-60.5382957458	0.0332983806729	22.5	1.12924716868	0.000218	Pvalb-IRES-Cre	ME
843400612	123.77409636974336	0.0092434393640355	-69.70603506905692	0.0038448679260909	26.010936737060547	1.3413870226719686	0.0004049999999999	Pvalb-IRES-Cre	MET
720692646	205.46886324882507	0.0156382278788945	-63.10700572620738	0.0370709300041198	39.54999923706055	2.181678625427412	0.000526	Sst-IRES-Cre	MET
742008238	87.03135699033737	0.0050711015226945	-74.18211873372395	0.0158462785184383	20.575000762939453	1.7414192933696933	0.0004399999999999	Sst-IRES-Cre	MET
639002031	207.55214989185333	0.0150711248825357	-75.66932460239956	0.0224321447312831	25.053572790963308	3.1467471308744064	0.0005057142857142	Vip-IRES-Cre	MET
531121585	249.218866229	0.0143690652458	-72.1371765137	0.0663887560368	30.6375007629	2.96057160309	0.000556	Vip-IRES-Cre	ME
825222584	100.99990665912628	0.0076226156233662	-73.25742686878552	0.0188356935977935	24.893749237060547	1.4630970258698306	0.00038	Pvalb-IRES-Cre	MET
676685241	238.2812798023224	0.0136406653683696	-69.62704086303711	0.0833111256361007	27.45703232288361	2.443067414659598	0.0006324999999999	Vip-IRES-Cre	MET
479225274	105.468638241	0.00732488796714	-68.587928772	0.0845737978816	24.0562515259	1.46440365804	0.000308	Pvalb-IRES-Cre	ME
788325819	348.722368478775	0.0327601982562245	-65.52245457967122	0.1010619476437568	29.31562614440918	2.1218946932113063	0.00061	Sst-IRES-Cre	MET
696059326	234.53108966350555	0.0187646433522537	-70.10471598307292	0.250300794839859	19.00000190734864	1.7282037128698131	0.0005399999999999	Sst-IRES-Cre	MET
832005570	231.1248779296875	0.0144731525385922	-73.90016174316406	0.1122904792428016	31.075000762939453	2.526198001486996	0.0005399999999999	Vip-IRES-Cre	MET
488687042	221.093714237	0.00916673648745	-74.0521774292	0.0425620898604	17.6197910309	1.59107339004	0.000345	Pvalb-IRES-Cre	ME
679650759	205.46889305114743	0.0121997736051994	-70.0708930275657	0.3071004152297973	29.6875	2.3486757744257067	0.0004399999999999	Vip-IRES-Cre	MET
762766803	89.5313248038292	0.0083676251109546	-63.77555677625868	0.0157160591334104	25.408334732055664	1.6339095522927929	0.0003533333333333	Pvalb-IRES-Cre	MET
710895059	145.9375023841858	0.0153048740313277	-74.69569396972656	0.0625030025839805	25.412500381469727	1.8839393975424337	0.0004319999999999	Sst-IRES-Cre	MET
689030611	109.37495529651642	0.0086061003595473	-70.60073725382487	0.0385576859116554	17.037500381469727	1.7211184350046231	0.0004319999999999	Sst-IRES-Cre	MET
318522838	103.281363845	0.00440392423015	-77.5536880493	0.0613643974066	15.28125	1.67123752944	0.000438333333333	Pvalb-IRES-Cre	ME
740165079	198.1250643730164	0.0192636194750519	-63.086233139038086	0.1959730833768844	33.98125076293945	2.48638681056255	0.00058	Sst-IRES-Cre	MET
509617624	150.000110269	0.00746066645598	-71.8766479492	0.0468629747629	21.78125	1.39432781626	0.000325	Pvalb-IRES-Cre	ME
718882265	65.23435562849045	0.0060344365943243	-71.8576595908717	0.0059562758542597	10.468750582800972	1.393731774313128	0.0003111111111111	Pvalb-IRES-Cre	MET
515302868	124.375037849	0.00751950160733	-77.403427124	0.00342071987689	19.640625	1.43626880911	0.00037	Pvalb-IRES-Cre	ME
760268259	173.9061325788498	0.0149724691978017	-64.48238711886935	0.0252882726490497	36.21458435058594	2.112754240007864	0.00052	Sst-IRES-Cre	MET
313861608	81.2499970198	0.00591908951514	-74.6396484375	0.00915148854256	23.3875007629	1.39723656146	0.000305	Pvalb-IRES-Cre	ME
843400687	74.67389851808548	0.0100657928041282	-52.96717933986498	0.0499429106712341	20.799999237060547	1.3299953143795826	0.0003199999999999	Pvalb-IRES-Cre	MET
741803504	172.81226813793182	0.022552061331082	-69.09191449483235	0.0252973437309265	34.502498626708984	2.2684498368278447	0.00054	Sst-IRES-Cre	MET
770237944	356.4687371253968	0.0425444480584319	-60.46180901160607	0.0450068637728691	35.006874084472656	1.9690511367345904	0.000482	Sst-IRES-Cre	MET
808445433	69.35659795999527	0.0099604250875606	-66.28668386285955	0.0813774839043617	33.51874923706055	1.5070513291512708	0.00034	Pvalb-IRES-Cre	MET
803603965	140.97662270069122	0.0179186640539158	-69.59526238074669	0.0957069545984268	21.03125190734864	1.8210066764618664	0.00036	Sst-IRES-Cre	MET
328549885	288.281261921	0.0363871263202	-62.3680496216	0.0430564247072	36.75	2.37918217485	0.00057	Sst-IRES-Cre	ME
750798337	240.3978407382965	0.0216790735951914	-59.82307929992676	0.2179782390594482	38.03125	1.7752650496360114	0.0005199999999999	Sst-IRES-Cre	MET
750446086	177.03132331371307	0.0135012368938008	-69.52011775970459	0.0655431449413299	12.368749618530272	1.718285436655534	0.0004999999999999	Sst-IRES-Cre	MET
322520586	82.8124955297	0.00509994139192	-83.3805389404	0.0359153226018	17.5	1.48230866625	0.000374166666667	Pvalb-IRES-Cre	ME
730744331	76.09347999095917	0.0059747932770008	-71.29383494059245	0.0245245452970266	21.61250114440918	1.436926767078286	0.00034	Pvalb-IRES-Cre	MET
755541521	112.9545345902443	0.0087208758629065	-66.0652084350586	0.0319395959377288	30.01875114440918	1.238609238781464	0.00034	Pvalb-IRES-Cre	MET
656860694	121.25010788440704	0.0094672094141604	-55.32877486092704	0.0490868873894214	31.39583396911621	2.5846733180137664	0.00048	Vip-IRES-Cre	MET
762709526	113.2812425494194	0.0077534430959684	-70.00675540500217	0.0200494602322578	22.75	1.5902834145008062	0.0003599999999999	Pvalb-IRES-Cre	MET
663193112	211.87499165534973	0.0116590103680935	-63.09300825330946	0.0249147377908229	7.46875	1.433177014864689	0.0005266666666667	Pvalb-IRES-Cre	MET
697804311	87.96863257884979	0.0072496014825948	-72.42326507568359	0.0738308876752853	30.34375190734864	1.3694754610713025	0.0002999999999999	Pvalb-IRES-Cre	MET
705144343	220.9376096725464	0.0255117581285992	-69.59425438774957	0.2421647608280182	30.00000190734864	1.842974519081347	0.0005599999999998	Sst-IRES-Cre	MET
705570328	321.09373807907104	0.0212138318237937	-75.60611724853516	0.0592813827097415	24.33333396911621	1.8813544172527208	0.0005733333333333	Sst-IRES-Cre	MET
322536988	187.656208873	0.0141696845021	-79.2035598755	0.136457264423	24.25	1.77185643846	0.000496	Sst-IRES-Cre	ME
692528669	169.2187488079071	0.0108825694177857	-68.86176300048828	0.0793852806091308	22.1875	1.7400263628627055	0.0004399999999999	Sst-IRES-Cre	MET
575923740	212.968826294	0.0115112678056	-69.3597869873	0.0464839525521	36.80078125	3.01790961315	0.0006025	Vip-IRES-Cre	ME
750798367	254.21905517578125	0.0185628806508496	-55.59300518035889	0.1108368411660194	38.31874847412109	1.7899950695494484	0.0005399999999999	Sst-IRES-Cre	MET
728098342	155.6248813867569	0.0140094496570913	-78.67065525054932	0.137365236878395	11.0703125	1.5656419537768202	0.0003599999999999	Sst-IRES-Cre	MET
679265830	336.25003695487976	0.0179008297237195	-71.44807503440164	0.2613507509231567	34.9921875	3.074030211664887	0.000645	Vip-IRES-Cre	MET
898983466	188.57797980308533	0.0129445340680748	-55.739864603678384	0.2418183237314224	37.95208740234375	2.132755877032172	0.0003666666666666	Vip-IRES-Cre	MET
730744363	138.43749463558197	0.0081471399055415	-73.15496444702148	0.0510140433907508	21.0234375	1.4257286606054465	0.0003499999999999	Pvalb-IRES-Cre	MET
720545325	308.1251084804535	0.0251674067312298	-83.1125901874743	0.1018942892551422	28.796875	2.198868992798404	0.00073	Sst-IRES-Cre	MET
762652214	88.74987810850143	0.0049308188495241	-71.34268273247613	0.0250647366046905	18.90625	1.6380930955586088	0.00036	Pvalb-IRES-Cre	MET
710755895	103.28136384487152	0.0064294896219204	-75.59063381618924	0.0256915800273418	18.5390625	1.3744360840192371	0.0003349999999999	Sst-IRES-Cre	MET
737412666	373.59368801116943	0.0136822320888837	-65.76993560791016	0.2022976279258728	42.41875076293945	2.4433280941565214	0.0003999999999999	Vip-IRES-Cre	MET
741090878	158.43753516674042	0.0162918167042477	-75.106787109375	0.0404738001525402	32.0	1.769678529302999	0.0005199999999999	Sst-IRES-Cre	MET
473540161	150.00000596	0.0164733772053	-69.6007232666	0.254479914904	34.3203163147	1.42835110017	0.00035125	Sst-IRES-Cre	ME
808846919	285.76287627220154	0.0298290235954912	-67.34558931986491	0.2078839987516403	21.44166755676269	1.976468124972612	0.00064	Sst-IRES-Cre	MET
511247944	61.8749596179	0.00696204997735	-72.9723205566	0.0163095258176	13.0687503815	1.57071225698	0.00034	Pvalb-IRES-Cre	ME
804963913	307.62508511543274	0.026491323956887	-36.2849946455522	0.124903030693531	45.52396011352539	3.091138768160753	0.0007399999999999	Vip-IRES-Cre	MET
705291850	228.74991595745087	0.0336516823925941	-66.9708465576172	0.1086160317063331	31.28125190734864	1.871177725141348	0.00068	Sst-IRES-Cre	MET
812951117	143.9688503742218	0.0107307212031309	-76.00381469726562	0.0394950360059738	25.23750305175781	3.107906178555968	0.00088	Vip-IRES-Cre	MET
765888079	99.06253218650818	0.0091508803994888	-68.18338775634766	0.0473429262638092	28.296875	1.482592859584493	0.00037	Pvalb-IRES-Cre	MET
823658063	101.38896852731703	0.008079146683696	-68.40647170122932	0.0127663994207978	22.650001525878903	1.6049848025816638	0.00037	Pvalb-IRES-Cre	MET
572409429	67.3438608646	0.00431814772344	-82.3871994019	0.0456111095846	27.5625	1.46141126809	0.00032	Pvalb-IRES-Cre	ME
770238038	171.2501496076584	0.0115495229381343	-74.94892813942649	0.0213354080915451	27.487499237060547	1.5509227218869708	0.00042	Sst-IRES-Cre	MET
639395418	318.6197876930237	0.0172500246845059	-62.02952052928783	0.0974530354142189	34.65	3.5071056069707347	0.000676	Vip-IRES-Cre	MET
693044826	162.34374046325684	0.0148970677324328	-75.78458997938368	0.0354545451700687	15.09375	2.105070523265844	0.0005199999999998	Sst-IRES-Cre	MET
694126170	260.15639305114746	0.0098757505229441	-70.03597030639648	0.1111666560173034	33.55208206176758	2.1952882046043354	0.0004066666666665	Vip-IRES-Cre	MET
759440987	296.5623736381531	0.0124892805163665	-69.72924423217773	0.0670475214719772	37.42499923706055	2.9630427014695684	0.0005199999999999	Vip-IRES-Cre	MET
744416867	90.4683992266655	0.006833345621371	-76.80049514770508	0.0547590032219886	17.950000762939453	1.428392780370444	0.0003199999999999	Pvalb-IRES-Cre	MET
892421732	79.31254804134369	0.0061947335790174	-75.00962829589844	0.0145024629309773	32.01250457763672	1.5478915653302494	0.00038	Pvalb-IRES-Cre	MET
756672100	49.21874776482582	0.0088570511739439	-54.08427914706144	0.0289159305393695	34.28000259399414	1.9307286379870088	0.000404	Pvalb-IRES-Cre	MET
570091111	149.687573314	0.00890085715448	-68.9976043701	0.0280609931797	24.5812511444	1.4774079368	0.000372	Pvalb-IRES-Cre	ME
649668205	185.62503159046173	0.014222840276566	-60.931357519967214	0.0724521353840828	40.64583206176758	2.749442121352464	0.0006399999999999	Vip-IRES-Cre	MET
795870832	214.74990248680115	0.0233793416186798	-70.60820492831144	0.1914309412240982	8.30000114440918	1.920130982908352	0.00068	Sst-IRES-Cre	MET
851019376	375.0934898853302	0.0264256106253345	-57.86699644724528	0.1394379734992981	29.00625228881836	2.289813182699164	0.00074	Sst-IRES-Cre	MET
752027250	133.89208912849426	0.0120685699821467	-68.92033301459418	0.0423953682184219	32.906253814697266	1.883196772100609	0.0004399999999999	Sst-IRES-Cre	MET
786228859	246.29075825214383	0.0279223378488299	-70.6689453125	0.0167420469224452	35.9375	1.9927954920356448	0.00056	Sst-IRES-Cre	MET
720684671	205.9374898672104	0.0168088752287911	-73.74913363986545	0.1382456719875335	24.4765625	2.324294322440785	0.0006499999999999	Sst-IRES-Cre	MET
591627904	152.343943715	0.00809890449048	-73.8495483398	0.0691306889057	41.7000007629	2.61954742508	0.000412	Vip-IRES-Cre	ME
727238274	143.90617609024048	0.0126231196263833	-73.04072418212891	0.1277326941490173	38.25625076293945	1.711687675104825	0.000404	Sst-IRES-Cre	MET
720725635	126.87499821186066	0.0083019416787397	-61.214729732937286	0.0718826577067375	27.90625	1.5037892865585447	0.0003319999999999	Sst-IRES-Cre	MET
797771399	192.7500069141388	0.0086083738816787	-79.57904676957564	0.0525224283337593	44.65625	4.136636946429178	0.00076	Vip-IRES-Cre	MET
727041671	261.406272649765	0.0308136783749301	-69.72356499565973	0.1965586990118026	35.17187690734863	2.585213755493037	0.0006899999999999	Sst-IRES-Cre	MET
765970060	134.06237959861755	0.0096506311545101	-63.33816432952881	0.0311166234314441	28.88125228881836	1.4600343972512226	0.0003799999999999	Pvalb-IRES-Cre	MET
768763533	169.90600526332855	0.0157735535912533	-71.94626312255859	0.0856478288769722	34.96562576293945	2.204498623651748	0.0004999999999999	Sst-IRES-Cre	MET
808535692	406.4983129501343	0.0210163439784726	-70.0933100382487	0.1615046113729477	14.653125762939451	1.781975689040654	0.0007099999999999	Sst-IRES-Cre	MET
668444309	193.90612840652463	0.0121301710401573	-74.83566999435425	0.0387668199837207	19.6796875	2.8213027463387834	0.000715	Vip-IRES-Cre	MET
729212566	219.6874618530273	0.0249265675895847	-66.31045150756836	0.0074211424216628	11.15625	2.0159023115569514	0.000625	Sst-IRES-Cre	MET
717637270	130.7813674211502	0.0083861201051604	-82.52057571411133	0.040570106357336	12.000000272478376	1.7218267654428747	0.0003971428571428	Pvalb-IRES-Cre	MET
803047064	132.71138072013855	0.0113442665427555	-60.170820236206055	0.0542015023529529	34.02499771118164	1.865128596265498	0.00048	Sst-IRES-Cre	MET
756500119	211.7968946695328	0.0162702682535537	-56.729302978515626	0.0427996553480625	38.88125228881836	1.550995291848741	0.0003899999999999	Sst-IRES-Cre	MET
565880475	162.500187755	0.00789695152453	-73.9775772095	0.0427110940218	47.984375	3.26901656826	0.00059	Vip-IRES-Cre	ME
754697892	107.3438599705696	0.0082070990287018	-78.96890068054199	0.0342045202851295	34.11250305175781	2.013474243393984	0.00056	Sst-IRES-Cre	MET
482690728	162.544712424	0.00953145506847	-70.6075286865	0.0740037932992	20.9750003815	1.35590037198	0.000279	Sst-IRES-Cre	ME
892495532	85.56262403726578	0.0058747383925068	-72.71630096435547	0.0081360563635826	27.24374961853028	1.5248240526945578	0.0003599999999999	Pvalb-IRES-Cre	MET
681649837	84.21874791383743	0.0072242626809198	-70.88360913594563	0.0201922226697206	26.42410659790039	1.4868119886865137	0.00032	Pvalb-IRES-Cre	MET
759555764	180.7813495397568	0.0135048787914824	-76.90640869140626	0.0121978903189301	3.114843845367432	2.704953312506892	0.0008428571428571	Vip-IRES-Cre	MET
707397301	199.2187798023224	0.0205339637768097	-49.31377983093262	0.0994756445288658	39.36458206176758	1.873374049271388	0.0006933333333333	Sst-IRES-Cre	MET
725903029	191.87507033348083	0.0181231353106678	-68.6424797905816	0.1937290430068969	41.81874847412109	2.027658372130465	0.0004679999999999	Sst-IRES-Cre	MET
560424631	215.781331062	0.00987944236078	-77.8553085327	0.0365649908781	37.6124992371	2.71634052733	0.000624	Vip-IRES-Cre	ME
657442490	339.84366059303284	0.0248540511853952	-71.51313705444336	0.0120424525812268	12.906250476837158	2.234002190850992	0.00056	Sst-IRES-Cre	MET
756524730	295.700341463089	0.0244695939046355	-67.58113034566243	0.008655815385282	19.071876525878903	1.6797280050038914	0.0005899999999999	Sst-IRES-Cre	MET
509683388	146.718785167	0.00928631447141	-67.3776779175	0.0155203137547	27.546875	1.27749865688	0.00026	Pvalb-IRES-Cre	ME
582641339	252.656370401	0.0162207171037	-60.2816848755	0.010339923203	47.796875	3.05705391498	0.0006	Vip-IRES-Cre	ME
807347904	258.1249475479126	0.0251706067961963	-63.20486609141032	0.1580371111631393	20.822917938232425	2.103895308454699	0.00068	Sst-IRES-Cre	MET
476104386	84.3749642372	0.00450208118408	-71.2060165405	0.031659912318	21.5625	1.17956854426	0.000251666666667	Sst-IRES-Cre	ME
716760772	167.03112423419952	0.0129884369840121	-75.4896369934082	0.1457289606332779	34.16875076293945	2.8147530337132336	0.0005479999999999	Vip-IRES-Cre	MET
718571204	212.6561850309372	0.0200441736960488	-53.07880841768705	0.2486871480941772	51.69791793823242	2.338212287826991	0.0006066666666666	Sst-IRES-Cre	MET
758179526	245.156079530716	0.0177010063603725	-65.99540481567382	0.2453680634498596	27.8416690826416	2.7317871218038494	0.00052	Vip-IRES-Cre	MET
762463942	274.45316314697266	0.0191686133823536	-61.711975479125975	0.1166924834251403	33.76875305175781	3.1671758019055085	0.0007049999999999	Vip-IRES-Cre	MET
710911693	125.9375661611557	0.0097907275204769	-69.15970142071063	0.0329088531434536	21.92708396911621	1.883201411642213	0.0004466666666667	Sst-IRES-Cre	MET
713336527	159.53120589256287	0.0094985400923593	-58.08635711669922	0.0394515842199325	18.88541984558105	1.572478315490338	0.0003733333333332	Sst-IRES-Cre	MET
710887122	113.59374970197678	0.0093084270573081	-64.01975758870442	0.1167606487870216	16.437500476837158	1.6698138806014513	0.000355	Sst-IRES-Cre	MET
694183636	230.1560938358307	0.0145412550202849	-73.60401852925618	0.1956024318933487	34.046875	2.570838686147878	0.0004533333333333	Vip-IRES-Cre	MET
766674646	239.84374105930328	0.0170809451953843	-73.9284568786621	0.036356221884489	35.78750228881836	1.6315331458784188	0.0005	Sst-IRES-Cre	MET
669165270	189.218744635582	0.0122006546930908	-77.72631211714311	0.1770379841327667	10.677083015441896	2.316190271855259	0.0005966666666666	Sst-IRES-Cre	MET
843409112	76.87507569789886	0.0064671228722618	-75.95605214436848	0.0564728416502475	0.4781250357627868	1.5124627508463098	0.0002999999999999	Pvalb-IRES-Cre	MET
510715606	98.9955067635	0.00772298828548	-74.5770797729	0.0657196864486	21.3187503815	1.33184309756	0.00028	Pvalb-IRES-Cre	ME
738551522	307.65628814697266	0.0232533315486513	-62.3794638893821	0.0346843712031841	31.33749961853028	3.809304903980967	0.00092	Vip-IRES-Cre	MET
657983207	127.81260907649994	0.014333754997871	-61.56776936848959	0.0148800536990165	36.020833333333336	1.8114842855890896	0.0004066666666666	Sst-IRES-Cre	MET
718128873	201.87510550022125	0.0137299008836573	-79.62552558051215	0.0777485072612762	20.22395896911621	1.7076546705422084	0.0005266666666666	Sst-IRES-Cre	MET
706463467	193.749874830246	0.0201096377998333	-72.18503799438477	0.1655641347169876	38.66666793823242	2.452292544229361	0.0006333333333333	Sst-IRES-Cre	MET
718874355	92.50007569789886	0.0066573850169352	-75.71426936558315	0.0736365467309951	17.568750381469727	1.543237756742831	0.0003639999999999	Pvalb-IRES-Cre	MET
812951286	266.2189900875092	0.017103491316482	-65.46301824396306	0.0341390967369079	37.01250076293945	3.08724968426713	0.0008699999999999	Vip-IRES-Cre	MET
818792182	99.12502020597458	0.0078233577246544	-69.858530217951	0.1067233458161354	30.42500114440918	1.2822590923273645	0.00028	Pvalb-IRES-Cre	MET
679462648	245.4688251018524	0.0298300600865658	-69.43828582763672	0.2268515080213546	28.62500190734864	2.3275211907136164	0.00062	Sst-IRES-Cre	MET
693069559	133.906289935112	0.011877379761028	-74.86146630181207	0.0958211570978164	24.390625	1.9741231514150328	0.00047	Sst-IRES-Cre	MET
850790138	244.25002932548523	0.022067944868945	-69.92117233276367	0.1744420975446701	36.28750228881836	2.1135060012997	0.0005199999999999	Sst-IRES-Cre	MET
756672253	118.5939759016037	0.0056037599292349	-76.43115095658736	0.0087685659527778	22.93124961853028	1.2625769644497702	0.0003199999999999	Pvalb-IRES-Cre	MET
572376830	129.687309265	0.00806618377996	-67.9297332764	0.0042710728012	26.2135410309	1.17903981373	0.000306666666667	Pvalb-IRES-Cre	ME
579282688	103.281252086	0.00779071195151	-74.3985824585	0.0472614020109	19.78125	1.45194981767	0.000366666666667	Pvalb-IRES-Cre	ME
805619463	199.2187052965164	0.0161699806766389	-73.76782503995028	0.0357037484645843	-0.3062500258286794	2.0778570988312333	0.00066	Sst-IRES-Cre	MET
752076561	245.4688847064972	0.0298755517392854	-61.23585557937622	0.1270797252655029	32.67500305175781	2.0934800558501534	0.00074	Sst-IRES-Cre	MET
727279381	311.19784712791443	0.0216222401968231	-57.69397122519357	0.0587463974952697	27.99375343322754	2.001280162909618	0.0005279999999999	Sst-IRES-Cre	MET
825296663	44.43754255771637	0.0056107441576588	-71.08096567789714	0.0820851624011993	28.28750228881836	1.4016582518683804	0.0003199999999999	Pvalb-IRES-Cre	MET
476686112	240.781292319	0.0229971799225	-64.7840652466	0.116980828345	47.6624984741	1.87129861192	0.000495	Sst-IRES-Cre	ME
523478821	231.562420726	0.0194120421241	-71.2807159424	0.0236294623464	41.6749992371	2.88153401493	0.00052	Vip-IRES-Cre	ME
850872104	495.5939054489136	0.025676993687613	-54.539927291870114	0.053591288626194	15.615625381469728	2.445682368651241	0.000715	Sst-IRES-Cre	MET
741140268	285.15625	0.0178343421064297	-70.52129821777343	0.0468761622905731	4.9375	1.880942664450548	0.0005999999999999	Sst-IRES-Cre	MET
740099887	268.74980330467224	0.0219113609082025	-70.41968441009521	0.0688532963395118	4.206250190734863	1.7585749578807528	0.0005399999999999	Sst-IRES-Cre	MET
766060336	70.71883976459503	0.0059823298775582	-63.66963005065918	0.0440687574446201	39.04375457763672	1.4729477822574637	0.0003599999999999	Pvalb-IRES-Cre	MET
738379580	243.5511350631714	0.0224457834579916	-81.04216596815321	0.0327225513756275	-1.0437500476837158	3.240660687134711	0.0012399999999999	Vip-IRES-Cre	MET
805619519	141.906276345253	0.0116060088152436	-71.42626120827414	0.0373859889805316	30.67500114440918	1.7264904821475733	0.0005399999999999	Sst-IRES-Cre	MET
844875592	176.9375205039978	0.0105100210821242	-70.37227401733398	0.0735381469130516	36.23958587646485	2.844916645663256	0.0004799999999999	Vip-IRES-Cre	MET
479897420	319.866210222	0.0296965902373	-64.9805145264	0.0311772804707	28.8125019073	2.06868804223	0.000488333333333	Sst-IRES-Cre	ME
668337999	127.03125178813934	0.0130752382505894	-66.43841722276476	0.0689882412552833	34.328125	1.6924811223452658	0.00041	Sst-IRES-Cre	MET
753936208	170.31230032444	0.0196910845694076	-67.07281833224826	0.0616259761154651	21.27291679382324	1.662986724621532	0.0004933333333333	Sst-IRES-Cre	MET
733333331	113.75026404857635	0.0067187854995752	-69.30513095855713	0.05748276039958	30.381250381469727	1.3319130889984696	0.00034	Pvalb-IRES-Cre	MET
669165397	145.4687863588333	0.0188499647142744	-75.21349452092097	0.1153859421610832	28.784374237060547	2.1339098504321106	0.0006019999999999	Sst-IRES-Cre	MET
523478869	90.9376144409	0.00665422829877	-80.3424835205	0.00733394920826	15.5562496185	2.48738817982	0.000816	Vip-IRES-Cre	ME
805603173	166.28111898899078	0.0162751561290834	-62.08744525909424	0.0230526123195886	17.305469512939453	1.9257111798542323	0.000625	Sst-IRES-Cre	MET
703219562	235.93761026859283	0.0288645330365463	-66.76635971069337	0.0786283165216445	32.84375	2.3658437897924167	0.0005600000000001	Sst-IRES-Cre	MET
693266287	244.21878159046173	0.0150991411109072	-63.92418416341146	0.1520975828170776	30.87500190734864	2.5900211589705604	0.0004399999999999	Vip-IRES-Cre	MET
759924594	207.3436677455902	0.0242738444426912	-68.12047290802002	0.0100407609716057	19.700000762939453	2.252709145435074	0.00058	Sst-IRES-Cre	MET
807348085	167.43743419647217	0.0192672239490119	-79.95146408081055	0.0652775019407272	20.43750190734864	2.0321090886527147	0.00064	Sst-IRES-Cre	MET
718759804	157.8126847743988	0.0137707118927245	-66.30011494954427	0.0062414947897195	33.89731979370117	2.322322928106627	0.0004942857142857	Sst-IRES-Cre	MET
750241663	327.34373211860657	0.0254034116979895	-58.53314018249512	0.1776343733072281	37.66249847412109	1.9700317271772527	0.0005	Sst-IRES-Cre	MET
750331780	266.3673162460327	0.0540510435411139	-63.52693419022994	0.0633115470409393	37.99687576293945	2.562005084166419	0.0007599999999999	Sst-IRES-Cre	MET
759416712	400.9999930858612	0.0227863453205147	-55.60562744140625	0.0097793592140078	20.64999961853028	2.345951321948312	0.0007099999999999	Sst-IRES-Cre	MET
758196105	119.53105032444	0.0107426635234315	-66.27896404266357	0.0412055440247058	23.76875114440918	1.814540951425556	0.0004399999999999	Pvalb-IRES-Cre	MET
718784393	335.78136563301086	0.0359675985228012	-68.18040873209635	0.1216933503746986	18.92500114440918	1.952565513843432	0.0006159999999999	Sst-IRES-Cre	MET
740157322	134.68722999095917	0.0143962173762153	-69.44239976671007	0.0536703281104564	22.9375	1.996514781364853	0.00048	Sst-IRES-Cre	MET
710223757	171.40623927116394	0.0157144251484762	-49.197305043538414	0.2200128734111786	28.614585876464844	2.6557095753884563	0.0007533333333333	Vip-IRES-Cre	MET
759891857	170.15628516674042	0.0201470567591834	-62.93605842590332	0.2507888078689575	49.775001525878906	2.4932324639593344	0.00052	Sst-IRES-Cre	MET
703276947	260.1562738418579	0.016691413953913	-46.716590881347656	0.0139972921460866	42.368751525878906	3.2360085266297887	0.0009439999999999	Vip-IRES-Cre	MET
844908436	161.03138029575348	0.010188493292699	-59.716759872436526	0.0550705902278423	47.44375228881836	3.0881816341690187	0.0004799999999999	Vip-IRES-Cre	MET
481093525	78.2812535763	0.0078189862506	-69.0012588501	0.0584532245994	12.6937503815	1.32153680993	0.00027	Pvalb-IRES-Cre	ME
906766242	212.81233429908752	0.0112470861343312	-70.24416427612304	0.0709529817104339	36.49062347412109	3.1587241593218223	0.0005199999999999	Vip-IRES-Cre	MET
844933030	183.81258845329285	0.0124600267077869	-74.16950836181641	0.1579537391662597	45.0390625	2.6923576989341607	0.000485	Vip-IRES-Cre	MET
762464168	200.46882331371307	0.0122843614461647	-70.09150102403429	0.1430299133062362	36.31874847412109	2.4848009695399904	0.00048	Vip-IRES-Cre	MET
636856236	268.8802480697632	0.0297202342145797	-68.05397360665458	0.0376199893653392	36.52734375	1.9489260651539333	0.0004374999999999	Sst-IRES-Cre	MET
738043822	264.68732953071594	0.0141327296226569	-66.07948472764757	0.1635455340147018	7.699999809265137	2.046239329455918	0.00054	Vip-IRES-Cre	MET
720545711	384.06264781951904	0.0203324148319823	-68.11631088256836	0.0644498467445373	18.625	1.978211494662542	0.000572	Sst-IRES-Cre	MET
704047023	226.7186343669892	0.0180953962267147	-75.64973907470703	0.1213340386748313	25.46875	1.6263917318470782	0.0004639999999999	Sst-IRES-Cre	MET
329254830	139.531254768	0.0107656683919	-74.6727905273	0.160879477859	22.5499992371	1.45292153105	0.000333	Sst-IRES-Cre	ME
693061554	233.7498366832733	0.024681348334854	-69.61511484781902	0.232084646821022	36.046875	1.9052688914357208	0.0004999999999999	Sst-IRES-Cre	MET
718202813	224.2186665534973	0.0208163040536072	-68.1027214050293	0.2173439860343933	13.556251525878906	1.8774794119746268	0.000712	Sst-IRES-Cre	MET
761743293	325.90916752815247	0.0217716557457835	-54.60777928278996	0.0339641459286212	37.48749923706055	3.274639698293784	0.0009799999999999	Vip-IRES-Cre	MET
760956866	142.18749105930328	0.0109875631688285	-70.78392887115479	0.0182608589529991	16.493751525878906	1.7315976334861554	0.0005199999999999	Sst-IRES-Cre	MET
745080784	129.53127920627594	0.0065653431343066	-64.53852272033691	0.0895840749144554	30.77187728881836	1.60423891281467	0.00037	Pvalb-IRES-Cre	MET
823830483	116.062693297863	0.0079580665376806	-69.94968531681941	0.0054860948584973	28.75625228881836	1.7012761220279569	0.0004199999999999	Pvalb-IRES-Cre	MET
475047891	310.468792915	0.031774316377	-72.0027694702	0.0298002120107	6.7421875	1.7416307032	0.00048	Sst-IRES-Cre	ME
692635606	278.4374952316284	0.0124525266387754	-64.3801284790039	-0.001308983657509	6.750000953674316	1.9094990295737504	0.0006599999999999	Vip-IRES-Cre	MET
766650329	334.8750174045563	0.0190894363438829	-70.36430358886719	0.1710694879293441	11.571874618530272	1.9059093127041404	0.00056	Sst-IRES-Cre	MET
648030172	181.24988675117493	0.0100058214190386	-76.50537664240056	0.0431517399847507	20.90625	3.887755056676001	0.0007399999999999	Vip-IRES-Cre	MET
698042345	86.71874552965164	0.0067763399409038	-65.97551536560059	0.0133614744991064	25.59375	1.384269306976926	0.000324	Pvalb-IRES-Cre	MET
825296874	208.5937112569809	0.0184719065484555	-68.23191833496094	0.1699778139591217	23.71875190734864	1.4964351015074118	0.00038	Pvalb-IRES-Cre	MET
318556138	148.749992251	0.00935336769302	-70.4658737183	0.0565289407969	31.484375	1.40563546351	0.000385833333333	Pvalb-IRES-Cre	ME
760981484	92.18749403953552	0.011937212108635	-64.97678544786241	0.0276660230010747	34.30000305175781	1.8216905536647765	0.0005299999999999	Sst-IRES-Cre	MET
759531501	228.437602519989	0.0135721740810213	-71.42979049682617	0.0236663129180669	25.53125190734864	3.114800246841359	0.0006599999999999	Vip-IRES-Cre	MET
475465708	244.37507987	0.0225851470005	-72.7958526611	0.148372203112	23.0	1.5383414444	0.000541	Sst-IRES-Cre	ME
779708399	155.3749442100525	0.0144537614926561	-71.41585748845881	0.0138199087232351	38.84062576293945	1.9541649761341728	0.00052	Sst-IRES-Cre	MET
692266992	259.3751549720764	0.0115693066689038	-74.63834599086216	0.0638457462191581	36.03125	3.561012510976481	0.000648	Vip-IRES-Cre	MET
313862134	219.218745828	0.00835050047563	-74.1142425537	0.0653395056725	29.6875	1.80109976435	0.000484	Sst-IRES-Cre	ME
823609338	73.59515875577927	0.0089518644114265	-70.36744280214663	0.0148065499961376	38.78594207763672	1.6377096316445643	0.0004399999999999	Pvalb-IRES-Cre	MET
756099070	85.62526106834412	0.0059622344183348	-68.5257085164388	0.0487514920532703	31.51249885559082	1.2605067953703262	0.0002799999999999	Pvalb-IRES-Cre	MET
676767745	326.0935842990875	0.022468638309323	-58.21284523010254	0.0396256558597087	29.98437690734864	3.426021880984388	0.001095	Vip-IRES-Cre	MET
745089035	121.40597403049468	0.0048979896369356	-72.53743896484374	0.0459840260446071	10.981250762939451	1.6969201114387276	0.0004307692307692	Pvalb-IRES-Cre	MET
805644302	264.5625174045563	0.033500133071131	-68.4922849214994	0.160636767745018	22.825000762939453	2.096076521757651	0.0006599999999999	Sst-IRES-Cre	MET
313862167	181.874960661	0.01103656764	-79.635635376	0.124726444483	0.427083343267	1.71511782649	0.000588333333333	Sst-IRES-Cre	ME
738043931	252.187728881836	0.0161903720813163	-70.00966548919678	0.0319855734705925	28.63749885559082	3.479947680375775	0.0008866666666666	Vip-IRES-Cre	MET
711403551	352.1874845027924	0.0353352696293992	-49.14422798156738	0.0475959107279777	54.0	2.151809866082006	0.0005	Sst-IRES-Cre	MET
562530336	327.723294497	0.0156891808419	-64.4382247925	0.0522093549371	50.8203125	2.62054916116	0.000465	Vip-IRES-Cre	ME
759457825	321.50381803512573	0.0407374997576355	-62.454569596510666	0.0251044910401105	27.01875305175781	2.0136601208684306	0.0005799999999999	Sst-IRES-Cre	MET
485058595	353.571385145	0.0292218902095	-67.0185089111	0.13890376687	31.4921875	1.70998530851	0.000465	Sst-IRES-Cre	ME
795781168	214.4687920808792	0.015858187487945	-70.59581909179687	0.1598946005105972	32.056251525878906	2.063570970037642	0.0005399999999999	Sst-IRES-Cre	MET
728533046	189.06249105930328	0.0183597104062836	-73.40207799275716	0.1413215100765228	29.33593940734864	1.624955162520857	0.0004399999999999	Sst-IRES-Cre	MET
674449465	201.56249403953552	0.0165759813348867	-73.5792798128995	0.100787378847599	21.772321701049805	2.016204877843055	0.0006199999999999	Sst-IRES-Cre	MET
756049977	236.2499088048935	0.0303258618064886	-65.28267923990886	0.0647914558649063	16.640626907348633	1.7241138109489806	0.0005666666666666	Sst-IRES-Cre	MET
479905853	214.464262128	0.0155455050569	-71.5020370483	0.0666440650821	3.21875	2.03861412117	0.00074	Sst-IRES-Cre	ME
831129668	171.93762958049774	0.0109054045303526	-68.55389404296875	0.0333427153527736	38.33749771118164	3.687565531481859	0.00074	Vip-IRES-Cre	MET
692824134	91.09371155500412	0.0065315860489051	-67.15176696777344	0.0187007058411836	24.78125	1.8269334449711885	0.0004099999999999	Pvalb-IRES-Cre	MET
769968202	183.77847969532013	0.0189631688383533	-71.88850957697088	0.2732266187667846	28.96249961853028	2.3584689581802696	0.0006999999999999	Sst-IRES-Cre	MET
807602251	308.1009089946747	0.0169614068522456	-68.88294358686967	0.1973160952329635	45.36250305175781	2.425986370837767	0.00052	Sst-IRES-Cre	MET
333604946	114.06250298	0.00690605500051	-73.1888122559	0.0661664158106	11.390625	1.55362870958	0.0004225	Pvalb-IRES-Cre	ME
715147348	232.65624046325684	0.0199710228227849	-55.64026896158854	0.0185464397072792	40.40104293823242	2.978189562237816	0.0005699999999999	Vip-IRES-Cre	MET
887048277	149.57816898822784	0.0090817998591007	-74.83088829403832	0.0726266726851463	21.61250305175781	1.5039226251974571	0.0003999999999999	Pvalb-IRES-Cre	MET
809338969	195.062518119812	0.0178155476530747	-69.16428833007812	0.1670518815517425	37.203125	1.8781350513141264	0.0005	Sst-IRES-Cre	MET
805636186	163.28135132789612	0.0206868472704914	-70.3766098022461	0.0686914473772049	40.19062805175781	1.9981119811229529	0.00056	Sst-IRES-Cre	MET
756549723	286.83027625083923	0.0302430457270373	-64.42051315307617	0.0341626182198524	49.09791564941406	1.7616874640969185	0.0006266666666666	Sst-IRES-Cre	MET
491038812	56.7187517881	0.00407017543156	-83.2276611328	0.0936134979129	16.1062507629	1.25261396395	0.000292	Pvalb-IRES-Cre	ME
747014238	192.03147292137143	0.0211806666010652	-65.44929599761963	0.1886712461709976	21.43750190734864	2.364597178221211	0.00064	Sst-IRES-Cre	MET
740100200	215.1561677455902	0.0214491376274352	-71.10602855682373	0.0409952476620674	29.68124961853028	1.9735174586200328	0.0006399999999999	Sst-IRES-Cre	MET
713181291	189.21886384487152	0.0232871491314644	-66.09172439575195	0.0042389892041683	25.575000762939453	2.2825815268764016	0.0004999999999999	Sst-IRES-Cre	MET
806725741	238.1249964237213	0.0241871151770751	-66.61676580255681	0.2251611500978469	10.96250057220459	1.7783360394815777	0.00062	Sst-IRES-Cre	MET
718653557	188.1248354911804	0.0088613590381933	-76.09014615145597	0.0297410190105438	18.77604103088379	1.4887999290186045	0.0003499999999999	Pvalb-IRES-Cre	MET
886335606	94.56241130828856	0.0093530531534171	-66.30118795541617	0.0223425086587667	15.974220275878906	1.4879427318383516	0.0003249999999999	Pvalb-IRES-Cre	MET
693135479	125.4686713218689	0.0101608409037491	-72.98588104248047	0.1518772393465042	15.625	1.7977796557381829	0.0004799999999999	Sst-IRES-Cre	MET
803072117	284.8190665245056	0.0300035507678641	-64.63117065429688	0.0288394689559936	27.193750381469727	1.9412223223588976	0.0006	Sst-IRES-Cre	MET
718645369	84.21874791383743	0.0067341350695534	-74.6055217069738	-0.0027944683097302	26.96250343322754	1.4268697870656122	0.000336	Sst-IRES-Cre	MET
802990210	254.90090250968933	0.0285778040033836	-51.33208111354283	0.0267290621995925	20.42500114440918	1.94652685995776	0.00058	Sst-IRES-Cre	MET
313862274	169.062495232	0.0188972519921	-64.2588272095	0.0413484051824	38.6205368042	1.89942227231	0.000479285714286	Sst-IRES-Cre	ME
754804871	230.46892881393435	0.0110178576623762	-68.33320236206055	0.0137639688327908	31.01041603088379	1.9596435235448784	0.0005133333333333	Sst-IRES-Cre	MET
581404810	179.374843836	0.007000446507	-69.3731384277	0.0678989961743	27.6812496185	1.54300628089	0.000444	Pvalb-IRES-Cre	ME
689678479	198.28124344348907	0.0165829346338335	-56.44879574245877	0.0743457153439521	44.85937690734863	1.8427046315425253	0.000575	Sst-IRES-Cre	MET
740673680	210.4688584804535	0.0196824972465642	-76.25252437591553	0.1516295373439788	21.456249237060547	2.015174489749759	0.0004599999999999	Sst-IRES-Cre	MET
601811091	407.9427421092987	0.0379484936357122	-67.6740858895438	0.0204472970217466	-0.2395831743876139	2.0061505175133267	0.0007266666666666	Sst-IRES-Cre	MET
715163795	239.06241357326508	0.0116201350718738	-72.55234874378552	0.1304626911878585	44.35416920979818	3.61943450410325	0.0006	Vip-IRES-Cre	MET
713238678	223.7501442432404	0.0133519043538326	-76.07262802124023	0.2104479670524597	17.375	1.5878061810432955	0.0003866666666666	Sst-IRES-Cre	MET
823281815	112.90626227855682	0.0112856630723655	-73.35279846191406	0.014031802304089	16.493751525878906	1.417140161229005	0.0003199999999999	Pvalb-IRES-Cre	MET
475580568	165.803566575	0.0103319234338	-73.2946472168	0.114712543786	37.8499984741	1.61793940799	0.000454	Sst-IRES-Cre	ME
759908509	165.3127521276474	0.0155258044932863	-60.30787801742554	0.0300504080951213	2.6937503814697266	1.8482609459028807	0.0004333333333333	Sst-IRES-Cre	MET
718645405	83.74994248151779	0.0108623751820361	-60.77411994934082	0.0163749624043703	25.60000114440918	1.8224460017570323	0.0004319999999999	Sst-IRES-Cre	MET
718219424	87.26570010185242	0.0059704731064416	-70.94417941185736	-0.0077573214657604	23.24218940734864	1.497203615646303	0.0003599999999999	Pvalb-IRES-Cre	MET
744843426	204.21867072582245	0.014539539356007	-66.15001254611545	0.0204375013709068	24.81875228881836	2.482626177765893	0.00108	Pvalb-IRES-Cre	MET
313862306	367.656260729	0.0250588551228	-72.7093658447	0.163964539766	33.1937484741	1.70954160005	0.000591	Sst-IRES-Cre	ME
324266146	207.031279802	0.0298502043913	-70.7011032104	0.141044139862	27.4583339691	1.90690810858	0.000475	Sst-IRES-Cre	ME
679250089	163.43745589256287	0.0117525692454495	-64.68044662475586	0.0308030098676681	16.21875	3.015798915817347	0.00052	Vip-IRES-Cre	MET
847087797	85.53134649991989	0.0079445478232026	-65.33482595590445	0.0169581305235624	33.91250228881836	1.3151497678836477	0.0002799999999999	Pvalb-IRES-Cre	MET
740853942	317.03126430511475	0.0345087994853437	-74.69960689544678	0.1251628249883651	27.4375	1.7602054758986228	0.0006	Sst-IRES-Cre	MET
659056830	281.71879053115845	0.016294825618973	-69.99690712822809	0.2175866961479187	26.59375	2.794236506047487	0.0006799999999999	Vip-IRES-Cre	MET
768796864	159.3748927116394	0.0363305607030526	-54.73170166015625	0.0463918894529342	32.69853030934053	2.304237445758593	0.0005647058823529	Sst-IRES-Cre	MET
491030723	186.718717217	0.0217075566956	-71.5811462402	0.0737541764975	19.4562492371	2.05387358123	0.000531	Sst-IRES-Cre	ME
760416458	273.4376788139343	0.0504879060086387	-64.37251815795898	0.0373791232705116	48.50312805175781	2.297010885527184	0.00064	Sst-IRES-Cre	MET
324266189	236.249998212	0.0240577000187	-67.1558532715	0.17793494463	38.71875	1.8245463506	0.000482	Sst-IRES-Cre	ME
575637715	282.812476158	0.024607568335	-71.9272232056	0.0787379667163	35.0187492371	2.16684584321	0.000592	Sst-IRES-Cre	ME
755435736	183.0681413412094	0.0075183294289065	-67.51880391438802	0.0073157437145709	28.775001525878903	1.3077265570051757	0.0004299999999999	Pvalb-IRES-Cre	MET
817195225	371.4100420475006	0.0355866175901603	-60.44793619428362	0.0380055978894233	32.92708206176758	2.002347066143835	0.0006299999999999	Sst-IRES-Cre	MET
685656286	127.4999976158142	0.0122054457676918	-68.01207046508789	0.0351691618561744	22.84375	2.208563580907085	0.0004600000000001	Sst-IRES-Cre	MET
756074718	129.06265258789062	0.0120883382908837	-63.910526275634766	0.0465969815850257	34.36250305175781	1.6690149330795043	0.00048	Sst-IRES-Cre	MET
623945953	246.0938096046448	0.0238879191386154	-67.98327347327923	0.1772279739379882	3.2070314288139343	1.7706208723623746	0.0007674999999999	Sst-IRES-Cre	MET
760842466	376.7184913158417	0.0341962442417856	-67.34257984161377	0.0508969873189926	20.07291603088379	1.9998945562857529	0.0005066666666666	Sst-IRES-Cre	MET
764872932	71.9062015414238	0.0062935665928781	-69.89174149676067	0.0218038242310285	35.35625457763672	1.3998978136594475	0.00036	Pvalb-IRES-Cre	MET
313862373	67.5000026822	0.00509893707982	-76.8938217163	0.0211086180061	14.765625	1.3800512571	0.000338333333333	Pvalb-IRES-Cre	ME
703154406	311.56253814697266	0.0337663576484319	-49.27067811148508	0.1059178933501243	40.83594036102295	2.1680054416864705	0.0006949999999998	Sst-IRES-Cre	MET
750242027	228.59400510787964	0.0200883375971524	-65.59764183892145	0.0565172508358955	15.709723472595217	1.8350178057076425	0.0005644444444444	Sst-IRES-Cre	MET
754804972	254.0624439716339	0.0182564658124277	-63.73420333862305	0.0387779548764228	43.12812805175781	2.0734301944979023	0.0005199999999999	Sst-IRES-Cre	MET
761325810	183.75033140182487	0.0091204179068856	-80.61516380310059	0.0376742929220199	34.51666641235352	3.3643772701516426	0.0007399999999999	Vip-IRES-Cre	MET
396650742	194.531053305	0.010378816679	-80.618347168	0.0784129947424	25.265625	1.38914872421	0.00031	Pvalb-IRES-Cre	ME
704047351	214.9999886751175	0.0200644398852288	-60.60852813720703	0.0918799191713333	32.234375	1.7447835369381908	0.0005133333333333	Sst-IRES-Cre	MET
760973561	169.2190021276474	0.0140105544123798	-66.2110595703125	0.0851659178733825	24.61874961853028	1.843174769634169	0.0005	Sst-IRES-Cre	MET
694847737	361.0936999320984	0.0293477284843803	-63.85331171209162	0.0443332679569721	2.1718751192092896	3.551748806864949	0.0010249999999999	Vip-IRES-Cre	MET
665602299	118.43734234571455	0.0103266598498209	-70.70181732177734	0.337863028049469	26.37500190734864	1.9726909407679427	0.0004999999999999	Sst-IRES-Cre	MET
750807290	194.6876496076584	0.0211998542423994	-60.502548429701065	0.0513114780187606	23.434375762939453	1.7222677666134976	0.0005	Sst-IRES-Cre	MET
759744765	184.218779206276	0.0175333394894067	-73.67107772827148	0.0107875810936093	14.306249618530272	2.246539050354213	0.0006	Sst-IRES-Cre	MET
710920450	330.15626668930054	0.0310074186158356	-69.41687545776367	0.0352886244654655	14.156250794728598	2.4517654071725405	0.00062	Sst-IRES-Cre	MET
571255047	229.28571701	0.0144588368527	-73.5998458862	0.01438597776	24.1375007629	2.61821547445	0.0007	Vip-IRES-Cre	ME
758130953	83.74976366758347	0.0054869660925558	-65.96166784113103	0.0152604850009083	30.75	1.4355541471314686	0.00036	Pvalb-IRES-Cre	MET
738453781	204.68749105930328	0.0127017413744002	-62.82209663391113	0.0330060720443725	34.10625076293945	3.103086162015615	0.00102	Vip-IRES-Cre	MET
837560603	97.70434349775314	0.0075931108391112	-66.94791967218572	0.0740198791027069	29.490625381469727	1.4339580208461438	0.0003399999999999	Pvalb-IRES-Cre	MET
757139742	135.46885550022125	0.0162543064167736	-61.45362243652344	0.0174684021621942	23.66874885559082	1.459754387780817	0.0004199999999999	Sst-IRES-Cre	MET
475515168	242.1875	0.0157444072434	-72.1569061279	0.190551131964	9.5	1.4910164839	0.000405	Sst-IRES-Cre	ME
807635236	231.04779422283173	0.0269144595567211	-64.54413080215454	0.0552600584924221	37.34375	2.2720251699178178	0.00058	Sst-IRES-Cre	MET
680560932	234.84370112419128	0.0098805118703434	-69.59026260375977	0.0422097146511077	43.67187881469727	2.8313759860806087	0.0005174999999999	Vip-IRES-Cre	MET
797722932	190.0780200958252	0.0122933884523029	-73.86925603472997	0.2468017786741256	26.902084350585938	2.2756808788620297	0.0005199999999999	Vip-IRES-Cre	MET
807627066	433.64301323890686	0.0356758728405643	-66.27210709542939	0.0109500121325254	32.43124771118164	2.1438056178090634	0.0005399999999999	Sst-IRES-Cre	MET
847694140	223.31255674362183	0.0220969300810531	-69.1467674255371	0.0125527810305356	1.5875000953674316	2.173011934303849	0.0006999999999999	Sst-IRES-Cre	MET
722774333	302.656352519989	0.0448738720406636	-60.52783966064453	0.0444284565746784	40.4921875	2.5049196262815494	0.00069	Sst-IRES-Cre	MET
753985861	388.7498676776886	0.0410680086119091	-60.59973621368408	0.091025486588478	40.63750076293945	2.3171836515007698	0.00064	Sst-IRES-Cre	MET
759769430	368.90658736228943	0.0299677087510835	-60.4037467956543	0.1093158796429634	13.76875114440918	1.813483822835744	0.00056	Sst-IRES-Cre	MET
817981788	109.03125256299973	0.0062127520625698	-72.56749239834872	0.0398799106478691	21.61250114440918	1.605225271099634	0.0004199999999999	Pvalb-IRES-Cre	MET
593054045	258.124887943	0.0171172016685	-69.6251373291	0.0478468872607	47.5999984741	3.07418452287	0.000544	Vip-IRES-Cre	ME
324495712	196.562543511	0.0217056055935	-63.5508232117	0.0360249504447	34.3937492371	2.08856842491	0.000492	Sst-IRES-Cre	ME
727181668	138.7498825788498	0.0118931752182343	-75.84084181352095	0.033418521285057	33.89583206176758	1.7640597557235267	0.00046	Sst-IRES-Cre	MET
575646054	302.343785763	0.0266904440132	-64.8493881226	0.086786441505	24.3359375	2.15819652436	0.00069	Sst-IRES-Cre	ME
729270635	357.9687476158142	0.0207827846223406	-62.27021814982096	0.0626132935285568	39.02083206176758	1.98193753813484	0.0005199999999999	Sst-IRES-Cre	MET
627870060	135.4167014360428	0.0132476796296412	-64.5008564999229	0.0645842775702476	30.57291603088379	1.9726959039701213	0.00042	Sst-IRES-Cre	MET
779839858	178.6564141511917	0.0205905497346109	-69.25469360351562	0.0517431870102882	33.46249771118164	1.9926982347982527	0.0005399999999999	Sst-IRES-Cre	MET
770238836	248.2812702655792	0.0309396062251483	-67.63490180969238	0.0497204028069973	11.528125762939451	2.02389138885158	0.0006099999999999	Sst-IRES-Cre	MET
674482551	228.5936325788498	0.0218105442713942	-72.22005615234374	0.1335162818431854	22.72916603088379	2.014602085347472	0.0005466666666666	Sst-IRES-Cre	MET
892414330	138.21883499622345	0.0072830390375093	-64.84607419100675	0.0612938143312931	19.68750190734864	1.6668780720897918	0.00042	Pvalb-IRES-Cre	MET
744458623	120.4688996076584	0.0059807704856899	-73.95244026184082	0.0832828357815742	25.74062728881836	1.8350310856447585	0.0003499999999999	Pvalb-IRES-Cre	MET
683411842	269.6094214916229	0.0169112841771186	-71.5902247428894	0.3098245561122894	-2.906250238418579	3.0318823257905314	0.0006999999999999	Vip-IRES-Cre	MET
729368968	345.93746066093445	0.020300281468856	-65.56776123046875	0.123436264693737	1.46875	2.057789938364093	0.0006600000000001	Sst-IRES-Cre	MET
756500874	252.6563405990601	0.0345583586782128	-65.25829696655273	0.080623835325241	34.05000305175781	1.6091996396945527	0.0005199999999999	Sst-IRES-Cre	MET
711903629	167.34375059604645	0.0145967469089811	-70.3126745223999	0.0643310621380806	18.94791603088379	1.900377454522891	0.00042	Sst-IRES-Cre	MET
486754703	190.134003758	0.0111057317351	-73.6521224976	0.0392634160817	4.765625	1.75799136947	0.000413333333333	Pvalb-IRES-Cre	ME
692808080	127.8124898672104	0.0103938237968114	-71.5893497467041	0.0865762308239936	29.415180206298828	1.373941199312842	0.0002828571428571	Pvalb-IRES-Cre	MET
794937757	260.98015904426575	0.0259289490784485	-66.33488130569458	0.009030663408339	27.606250762939453	2.1144280829633515	0.00048	Sst-IRES-Cre	MET
740780456	124.9999925494194	0.0141489588613907	-74.5347490310669	0.0470267049968242	35.431251525878906	2.0465959903088944	0.0004199999999999	Sst-IRES-Cre	MET
807635370	157.06245601177216	0.0158139176574686	-67.96474318070845	0.2248419970273971	45.21875	2.271021569486215	0.0005	Sst-IRES-Cre	MET
750176684	102.65607386827467	0.0088800293555163	-76.32136611938476	0.046371191740036	13.524999618530272	1.8895740016678608	0.00056	Sst-IRES-Cre	MET
591268268	121.607244015	0.00702053325648	-71.524810791	0.0571409203112	27.2135410309	1.37165391002	0.000313333333333	Pvalb-IRES-Cre	ME
757885358	100.93745589256288	0.0085516491837581	-71.45285669962566	0.0394248068332672	14.83750057220459	1.5885914257387244	0.0004399999999999	Sst-IRES-Cre	MET
472517038	171.316996217	0.0127624831678	-73.9048614502	0.0736213847995	14.9750013351	1.27475923719	0.000279	Sst-IRES-Cre	ME
847792560	238.906279206276	0.0176329598507619	-69.65824959494851	0.0593982674181461	31.07187461853028	1.9029448261009752	0.0004399999999999	Sst-IRES-Cre	MET
759540146	152.96877920627594	0.0096496128511747	-74.78648567199707	0.0101190013810992	21.75625228881836	3.148536964812919	0.0009599999999999	Vip-IRES-Cre	MET
779864499	123.35308641195296	0.0123861218383121	-75.33323351542155	0.0257956683635711	16.26875114440918	1.9716832456457063	0.00056	Sst-IRES-Cre	MET
760809918	387.3295187950134	0.0389791766034378	-72.83872270584106	0.0251466110348701	31.095834732055664	2.350275752422773	0.0006733333333333	Sst-IRES-Cre	MET
761326027	170.78112065792084	0.0115175999217176	-70.32454776763916	0.0736709237098693	38.95000457763672	3.315949750617779	0.0006099999999999	Vip-IRES-Cre	MET
648038863	271.56245708465576	0.0093077066671627	-65.66205558776855	0.0431229099631309	41.60625076293945	3.3987027515186234	0.000728	Vip-IRES-Cre	MET
728803793	120.62495946884157	0.0141565687761544	-50.01616605122884	0.1169679388403892	30.05625076293945	1.7540067077706252	0.000568	Sst-IRES-Cre	MET
676702674	200.4687786102295	0.0112270346524453	-76.23983446756999	0.0963465571403503	34.203128814697266	2.8520239587491294	0.0005249999999999	Vip-IRES-Cre	MET
834464214	93.37493777275084	0.0059731986744406	-73.29004391756925	0.0082083279266953	22.184375762939453	1.6131003366215284	0.0004	Sst-IRES-Cre	MET
700713441	217.96874701976776	0.0154849361851966	-74.19115278455946	0.0385706089437007	25.84375	1.702876358278132	0.0005399999999999	Sst-IRES-Cre	MET
765921766	98.6250266432762	0.0064494909488038	-71.13772137959798	0.0186108853667974	27.36250114440918	1.366075752385977	0.0003199999999999	Pvalb-IRES-Cre	MET
569723367	94.9999988079	0.00603482877883	-62.7908287048	0.0249732267112	24.0	1.33843235711	0.0003	Pvalb-IRES-Cre	ME
657615340	157.0313274860382	0.0100540741370944	-61.28561521831312	0.0364479608833789	41.51562881469727	3.701942400577876	0.00107	Vip-IRES-Cre	MET
812919277	231.0936897993088	0.0099763648228768	-75.62444559733073	0.0612543039023876	33.39375305175781	3.684100196007464	0.0008199999999999	Vip-IRES-Cre	MET
592816620	287.500083447	0.0162502067136	-61.7257728577	0.198210060596	43.3125	2.52238617646	0.00048	Vip-IRES-Cre	ME
727058929	116.09359085559844	0.0074437258799501	-72.82768096923829	0.0672846958041191	33.031253814697266	1.5895995329062529	0.0004733333333333	Sst-IRES-Cre	MET
747047415	147.03130722045898	0.0106441737331781	-65.03384468772195	0.0345727652311325	25.69999885559082	1.5226925239465467	0.0003799999999999	Sst-IRES-Cre	MET
759761401	239.06268179416656	0.0165239436591724	-77.42061614990234	0.0742479488253593	21.168750762939453	3.771289017740219	0.0007399999999999	Vip-IRES-Cre	MET
658139646	339.84389901161194	0.0384225866682277	-53.35709190368652	0.107095330953598	34.328125	3.000890383559033	0.00065	Vip-IRES-Cre	MET
778291711	88.12488615512848	0.0077570854935583	-71.50107040405274	0.0780440643429756	28.39791679382324	1.916976592443621	0.0004266666666666	Sst-IRES-Cre	MET
810617353	257.6877176761627	0.011454256800825	-68.43649638782848	0.0324861854314804	37.162506103515625	3.4767779072741707	0.00062	Vip-IRES-Cre	MET
692161037	257.18754529953003	0.0204887044204333	-66.66981506347656	0.2123461961746215	32.66666793823242	1.8614305873164487	0.00058	Sst-IRES-Cre	MET
475892238	65.7813698053	0.0063715209122	-77.5109863281	0.0459909923375	32.2625007629	1.68827146941	0.000375	Pvalb-IRES-Cre	ME
569723405	90.781211853	0.00662720763619	-72.3246231079	0.0106966979802	17.2777786255	1.35135741166	0.000335555555556	Pvalb-IRES-Cre	ME
760269328	195.3124850988388	0.0153209738072957	-77.94002628326416	0.0074119479395449	4.22812557220459	1.905205829621175	0.0007	Sst-IRES-Cre	MET
722831890	143.28140020370483	0.0166222592210052	-69.23325093587239	0.0792144611477851	36.962501525878906	1.768693490663861	0.000492	Sst-IRES-Cre	MET
741788179	150.4688262939453	0.0154845527975024	-77.68872748480902	0.0619666203856468	28.11874961853028	1.961871493403336	0.0006	Sst-IRES-Cre	MET
759908886	130.21603226661682	0.0095849722798789	-68.54438682224439	0.1007454320788383	23.00000190734864	1.7314511773158834	0.0004199999999999	Sst-IRES-Cre	MET
718883357	87.656170129776	0.0064966869715105	-82.4258207841353	0.0251300632953643	18.74374961853028	1.5366452058051796	0.00036	Pvalb-IRES-Cre	MET
657984036	183.1250637769699	0.0116262380236255	-50.169830594744	0.0231336783617734	29.3125	1.9006179937159715	0.0005399999999999	Sst-IRES-Cre	MET
761301546	224.8437702655792	0.0117061663238535	-72.49248962402343	0.0649931728839874	32.712501525878906	3.148316546403762	0.0006	Vip-IRES-Cre	MET
718473774	142.96893775463104	0.0151239708564946	-75.31709120008681	0.0405632331967353	43.15625	2.2901589984253627	0.00048	Sst-IRES-Cre	MET
562539062	254.062533379	0.0121327356446	-67.6989059448	0.0613565295935	49.3687515259	2.35005556585	0.000408	Vip-IRES-Cre	ME
485182007	59.5982782543	0.00502130841233	-69.2702255249	0.0497951172292	22.4166698456	1.31833878527	0.00027	Pvalb-IRES-Cre	ME
705710648	159.53128039836884	0.0189941606786491	-67.97530280219183	0.1374024748802185	23.34375190734864	2.053342287455071	0.0007399999999999	Sst-IRES-Cre	MET
750733881	185.6250613927841	0.0168685062852895	-74.2767832829402	0.0247571747750043	27.293750762939453	1.9277882854382715	0.0005399999999999	Sst-IRES-Cre	MET
759761472	234.85800623893732	0.0198156588744269	-68.151368882921	0.0274126287549734	10.800000190734863	1.7913499638674055	0.00068	Sst-IRES-Cre	MET
713132614	237.03128099441528	0.0139877578905447	-53.4271977742513	0.1058123409748077	49.609375	1.714340433726594	0.00041	Sst-IRES-Cre	MET
760834631	206.56222105026245	0.0141812980964473	-66.2882251739502	0.2174359709024429	34.187503814697266	2.050227192952813	0.0005	Sst-IRES-Cre	MET
771934792	171.87514901161194	0.0152495641361841	-76.39529724121094	-0.0048101949505507	18.215625762939453	1.9134527426244785	0.00046	Sst-IRES-Cre	MET
761834063	99.06253218650818	0.0064265545770578	-70.08461380004883	0.0334926284849643	26.731250762939453	1.6420764549933289	0.0003999999999999	Pvalb-IRES-Cre	MET
639380048	312.5000894069672	0.0165096468766727	-66.7406354157821	0.0637696608901023	16.85714340209961	2.8474330717414498	0.00068	Vip-IRES-Cre	MET
898697809	226.59385204315183	0.0141185858829242	-64.39587059020997	0.1050776019692421	29.231250762939453	2.2960804277391125	0.0004199999999999	Vip-IRES-Cre	MET
718195284	161.40635311603546	0.0125848947636051	-73.01676357493682	0.1098161712288856	25.71875	1.4562631562083823	0.0004919999999999	Sst-IRES-Cre	MET
745097813	129.2184740304947	0.0116230866934829	-62.15946752374823	0.0046984087675809	23.24062728881836	1.423522867461644	0.00034	Pvalb-IRES-Cre	MET
753912409	257.1872472763061	0.0178358373680984	-66.42254829406738	0.1660910993814468	21.700000762939453	1.857778976413555	0.0005799999999999	Sst-IRES-Cre	MET
761383513	123.28128516674042	0.010227537816718	-73.45208316379123	0.0016491692513227	16.212501525878906	1.6898594729356786	0.0004199999999999	Pvalb-IRES-Cre	MET
653863515	210.15620231628412	0.0150392525483872	-63.00731611251831	0.0305542573332786	33.062503814697266	3.559552449967835	0.00106	Vip-IRES-Cre	MET
753707616	461.5623354911804	0.0508259995089049	-60.76923370361328	0.0916485115885734	28.17083549499512	2.1935134770096374	0.0006733333333333	Sst-IRES-Cre	MET
579283563	70.4689025879	0.00480800596043	-74.9022216797	0.0338089093566	27.8958339691	1.4697922528	0.000313333333333	Pvalb-IRES-Cre	ME
572295788	107.187613845	0.00764561564026	-72.9819030762	0.00797497387975	25.8359375	1.22067681491	0.0003	Pvalb-IRES-Cre	ME
825256574	93.9062088727951	0.0075296657540891	-72.28722305297852	0.0481217876076698	28.68750190734864	1.5311623509613763	0.0004199999999999	Pvalb-IRES-Cre	MET
759458430	373.7944960594177	0.0230943046952543	-62.05993097478693	0.1822103708982467	9.658333778381348	2.320025045579827	0.0007866666666666	Vip-IRES-Cre	MET
524675712	109.062500298	0.00791628167637	-74.7324447632	0.056054558605	32.5437507629	3.25348982954	0.000464	Vip-IRES-Cre	ME
892504707	82.43751525878906	0.0057274883757129	-60.92217046564276	0.0275124311447143	34.66875076293945	1.4097655427877334	0.0002999999999999	Pvalb-IRES-Cre	MET
713288327	167.49998927116394	0.0163329151703533	-67.66825103759766	0.2385722249746322	33.515628814697266	1.82341775390626	0.0004399999999999	Sst-IRES-Cre	MET
648874633	393.4374749660492	0.0198506111287796	-60.21802478366428	0.1658387184143066	17.77083396911621	3.80763392767696	0.0007633333333333	Vip-IRES-Cre	MET
718654090	157.34389424324036	0.0171169149008145	-75.78120422363281	0.0824743211269378	4.046875	1.9138072692980952	0.00075	Sst-IRES-Cre	MET
764734091	195.1564699411392	0.0146221992394413	-62.05629009670682	0.0157161578536033	17.375001907348633	1.367912269929307	0.0004399999999999	Pvalb-IRES-Cre	MET
719637133	212.656319141388	0.0208285515633256	-74.87666112726384	0.1756886541843414	37.84999847412109	2.01515611940037	0.0004359999999999	Sst-IRES-Cre	MET
692783767	179.37511205673218	0.0113762669661517	-71.77779388427734	0.0288082547485828	31.5	3.1076215918112053	0.00052	Vip-IRES-Cre	MET
676768413	266.4063572883606	0.0224435950598769	-75.73512183295355	0.1976448744535446	37.34375	2.3962457364391456	0.0006199999999998	Vip-IRES-Cre	MET
758147742	89.53093737363815	0.0099658188331478	-64.65667114257812	0.0308252461254596	23.96875	1.5346428470201687	0.00034	Pvalb-IRES-Cre	MET
704768671	235.78113317489624	0.0208241406353768	-63.28139322454279	0.129845529794693	30.96875190734864	2.0462702959482857	0.0005999999999999	Sst-IRES-Cre	MET
719604384	166.8749898672104	0.0194178335503849	-66.23613166809082	0.0485483594238758	3.718750198682149	1.7957056268003349	0.0006166666666667	Sst-IRES-Cre	MET
594594470	165.625378489	0.00544311318772	-75.9137420654	0.0113019160926	35.9140625	2.92473019123	0.0005925	Vip-IRES-Cre	ME
760064682	103.26696932315826	0.0061844650215078	-62.65130500793457	0.0468091554939746	37.76250457763672	1.8461667847533048	0.00046	Sst-IRES-Cre	MET
646458029	204.99999821186063	0.0219836993900483	-72.3839201927185	0.1115420311689376	39.92499923706055	1.929427938287502	0.0004799999999999	Sst-IRES-Cre	MET
685632174	237.812489271164	0.0205735120834069	-70.06667556762696	0.1498399674892425	5.333333492279053	1.746022372955888	0.0009933333333332	Sst-IRES-Cre	MET
668265140	110.31249910593031	0.0060256993296418	-77.96272636862362	0.004361743107438	15.062500953674316	1.5715790799345968	0.0004399999999999	Sst-IRES-Cre	MET
898976436	170.0936108827591	0.0096421780885512	-73.88996332341975	0.0994055271148681	33.57291793823242	3.154851197854521	0.00056	Vip-IRES-Cre	MET
817957562	65.40615111589432	0.0132687532027968	-63.87313389778137	0.0788339674472808	22.368751525878903	1.4121343869894325	0.00036	Pvalb-IRES-Cre	MET
661293762	213.90612423419952	0.011789408708986	-71.23780168805804	0.1346391588449478	1.3281250596046448	2.5631943886934825	0.0007099999999999	Vip-IRES-Cre	MET
738429639	176.71851813793182	0.0095835041501298	-77.54790019989014	0.0850057154893875	39.46875	3.766188595676297	0.00062	Vip-IRES-Cre	MET
715156169	310.6251358985901	0.0206842679783881	-56.14925280484286	0.0239268951117992	27.765625	3.5999384778632404	0.00075	Vip-IRES-Cre	MET
810617546	323.9155411720276	0.0151284370930621	-67.82322336832682	0.1625633686780929	32.039581298828125	2.362729032720323	0.0004533333333333	Vip-IRES-Cre	MET
812935883	218.62494945526123	0.0134249587997314	-71.94823303222657	0.0507835038006305	22.299999237060547	3.100291724090967	0.00072	Vip-IRES-Cre	MET
804817611	269.6114182472229	0.029949129141438	-68.26411379300632	0.0875943526625633	12.02500057220459	1.7920963962540468	0.00064	Sst-IRES-Cre	MET
741796557	381.7184269428253	0.0301457607579171	-70.70059882269965	0.0776658058166503	31.36736297607422	1.9603546958471985	0.0006466666666666	Sst-IRES-Cre	MET
873712332	133.99989902973175	0.0159804591773116	-71.16118392944335	0.0425098687410354	37.36328125	1.890110081186949	0.0005775	Sst-IRES-Cre	MET
692300498	185.46874821186063	0.0110182685453929	-72.53446515401204	0.0802486762404441	40.96875381469727	3.114870227078461	0.0006479999999999	Vip-IRES-Cre	MET
658139862	288.43748569488525	0.012204471687904	-70.89802620627664	0.081545203924179	35.0859375	3.5382408164131247	0.000645	Vip-IRES-Cre	MET
753896151	275.31278133392334	0.0282332676619823	-65.66134897867839	0.2225431650876999	36.49374771118164	1.7247230570273273	0.0004999999999999	Sst-IRES-Cre	MET
772000472	64.17188793420792	0.0049711095187524	-68.87708854675293	0.0569710619747638	33.80624771118164	1.3940701245595992	0.0003199999999999	Pvalb-IRES-Cre	MET
736774881	265.2539312839508	0.0191704586003288	-67.88916084983133	0.0886395275592804	23.012500762939453	3.2876440388618624	0.0007399999999999	Vip-IRES-Cre	MET
716507874	249.3751049041748	0.0167613400925814	-61.31581846872965	0.0909524634480476	27.17708396911621	3.063313571333936	0.0005866666666667	Vip-IRES-Cre	MET
761768675	225.1419574022293	0.0125563966838108	-72.02214050292969	0.0789743512868881	44.04531097412109	3.7340547424576096	0.0008699999999999	Vip-IRES-Cre	MET
803392236	223.59398007392883	0.0179671101856274	-74.27159042358399	0.0539977997541427	0.9171874523162842	2.124123660649696	0.000785	Sst-IRES-Cre	MET
745073394	91.25003218650818	0.0092683115931972	-65.32437515258789	0.0657070130109787	26.38125228881836	1.3665998419525698	0.0002799999999999	Pvalb-IRES-Cre	MET
741198581	147.03139662742615	0.015491957533883	-76.01375198364258	0.0559182092547416	32.86249923706055	1.711484066664975	0.0005	Sst-IRES-Cre	MET
809642743	125.40636956691742	0.0075532511875268	-69.24444649436258	0.0685267522931099	23.475000381469727	1.6421806466447575	0.0004199999999999	Pvalb-IRES-Cre	MET
752020215	208.906352519989	0.0317125237994991	-63.022583855523	0.0705018490552902	20.950000762939453	2.108263662622404	0.0006999999999999	Sst-IRES-Cre	MET
730794744	297.65623807907104	0.0145284296693522	-59.10813369750976	0.048201747238636	34.742191314697266	3.21946611811626	0.0005999999999999	Vip-IRES-Cre	MET
719547130	182.96870589256287	0.0165326735127636	-77.4934012673118	0.0521402955055236	4.7578125	1.853804187320074	0.0005600000000001	Sst-IRES-Cre	MET
694717177	213.43742311000824	0.0108957563316096	-71.18819109598796	0.2011635601520538	32.01988705721769	2.577626454882858	0.0004454545454545	Vip-IRES-Cre	MET
638356222	109.76562649011612	0.0062720311609034	-71.41725673231967	0.0411161221563816	22.321428298950195	1.3444084213228396	0.0003228571428571	Pvalb-IRES-Cre	MET
740649731	211.4061266183853	0.0160827374954831	-76.36426467895508	0.1496084183454513	32.099998474121094	2.29466158412745	0.0005999999999999	Sst-IRES-Cre	MET
481127173	93.5937091708	0.00624132742916	-73.8991851807	0.0474311709404	24.9874992371	1.58284890809	0.00033	Pvalb-IRES-Cre	ME
705817351	206.71871304512024	0.0200185916272829	-55.71803841224084	0.0806426033377647	40.0625	2.5008627567909216	0.0005499999999999	Sst-IRES-Cre	MET
722774792	246.8751072883606	0.0139989909625113	-63.41227487417368	0.0687439516186714	12.895833969116213	1.734044453892648	0.00046	Sst-IRES-Cre	MET
849595147	184.6874952316284	0.0173087080487865	-74.31610107421875	0.0629084780812263	26.587501525878903	2.079008407281129	0.0005199999999999	Sst-IRES-Cre	MET
778275604	247.49991297721863	0.0242234052224656	-66.39960965243253	0.130151942372322	39.95208740234375	2.4262310687033364	0.0007199999999999	Sst-IRES-Cre	MET
726264600	138.59374821186066	0.0109981422208839	-73.54752265082465	0.0897666364908218	22.225000381469727	1.7844860313299875	0.000548	Sst-IRES-Cre	MET
760285976	244.8434680700302	0.0187213614023604	-75.29644944932726	-0.0427824594080448	25.72500228881836	1.9223385019332204	0.00056	Sst-IRES-Cre	MET
669805339	125.93746185302734	0.0064410526762022	-63.52667872111002	0.0226812176406383	26.34375	1.522044489435607	0.0003333333333333	Pvalb-IRES-Cre	MET
724790044	190.46878814697263	0.0172105375704934	-61.68213611178928	0.1756981611251831	38.26874923706055	2.7512502463671344	0.0006159999999999	Sst-IRES-Cre	MET
803605276	191.7186975479126	0.0154182211064263	-72.18777147928874	0.0390678234398365	20.243751525878903	1.7803783309533852	0.00056	Sst-IRES-Cre	MET
763054878	81.17179572582245	0.0058637131794998	-71.87432098388672	0.0090429270640015	9.631250381469728	1.493642615851626	0.0003199999999999	Pvalb-IRES-Cre	MET
805587743	269.53136920928955	0.0185200286650343	-65.45960639504825	0.1643328666687011	14.693750381469728	2.5387445409781324	0.0006	Vip-IRES-Cre	MET
800320286	219.1847562789917	0.0269998488292044	-55.20228086199079	0.0455331280827522	21.158748626708984	1.745729062464023	0.000668	Sst-IRES-Cre	MET
818023203	60.453202575445175	0.0059955828666858	-70.2938643745754	0.0883567705750465	36.04999923706055	1.3450026548154672	0.0003199999999999	Pvalb-IRES-Cre	MET
670329639	58.28136205673218	0.0046605672266911	-64.82718234592014	0.0860238745808601	34.140628814697266	1.7624967658703334	0.0003399999999998	Pvalb-IRES-Cre	MET
725945133	121.25010788440704	0.0109658594373739	-61.17211112976074	0.0418261922895908	34.743751525878906	2.2762638867644283	0.000508	Sst-IRES-Cre	MET
704604977	112.18738555908205	0.0134224548080824	-77.06257553100586	0.1296794861555099	36.96875381469727	1.6264143490527805	0.0004399999999999	Sst-IRES-Cre	MET
660704050	313.4373426437378	0.0401657700003839	-68.15556656686883	0.0740146115422248	42.23958206176758	2.184313569190691	0.0005533333333332	Sst-IRES-Cre	MET
718138161	202.18753814697263	0.0179782450391188	-69.50416564941406	0.0136506156995892	17.479167302449543	2.0094187231226672	0.0006533333333333	Sst-IRES-Cre	MET
817957684	109.68761146068572	0.0083970166189209	-65.31496200561523	0.0368265733122825	27.80000114440918	1.639422597395291	0.0004399999999999	Pvalb-IRES-Cre	MET
722889525	74.84376430511475	0.0438640266301464	-64.95659110659645	0.068192183971405	31.0625	1.459008971261416	0.00038	Pvalb-IRES-Cre	MET
803056434	225.875124335289	0.0280413835893143	-60.26861190795898	0.0389668978750705	29.342185974121094	1.8600361051025465	0.0005449999999999	Sst-IRES-Cre	MET
807619392	192.21866130828852	0.0195365043145641	-57.3790714263916	0.0298170112073421	28.939584732055664	2.086060443993857	0.0005933333333333	Sst-IRES-Cre	MET
753707847	232.6562702655792	0.0179298316688626	-65.01060104370117	0.1284762918949127	31.2450008392334	1.9549865179037007	0.00048	Sst-IRES-Cre	MET
759671629	296.4687049388885	0.0289586685398264	-65.01176350911459	0.1846853643655777	19.97291755676269	1.6005577910808215	0.0005466666666666	Sst-IRES-Cre	MET
707201871	246.87498807907104	0.0161943284758751	-59.96958923339844	0.2299259752035141	5.07421875	1.8743723511008208	0.0005974999999999	Sst-IRES-Cre	MET
759450448	234.53158140182487	0.0120912668154464	-63.37842407226562	0.035096600651741	26.5625	3.136613940635321	0.00056	Vip-IRES-Cre	MET
718646099	160.3124886751175	0.0187701989630017	-66.27941398620605	0.1630085855722427	38.90625	1.7404744392528044	0.0005199999999998	Sst-IRES-Cre	MET
754436948	318.7499046325684	0.0279150398455824	-50.362808814415565	0.0028605232946574	37.466251373291016	1.7091201588854872	0.000456	Sst-IRES-Cre	MET
726231894	321.71890139579773	0.0237178883832949	-62.5373666551378	0.069547951221466	9.243749618530272	2.072582246332741	0.000812	Sst-IRES-Cre	MET
754748254	235.31264066696167	0.0103348503719123	-62.8065431382921	0.1441153883934021	28.871875762939453	1.6066204171435423	0.00048	Sst-IRES-Cre	MET
647842659	196.0936337709427	0.0121439928539859	-68.76816643608942	0.0378411263227462	18.70833396911621	1.877983134287029	0.0003983333333333	Sst-IRES-Cre	MET
718195555	216.7186290025711	0.0181528693369226	-73.39102249145508	0.1634903252124786	38.54167175292969	2.184527020040119	0.0006133333333333	Sst-IRES-Cre	MET
480963429	80.62492311	0.00559770835502	-80.1982574463	0.0221640095115	29.4375	1.55387776654	0.000343	Pvalb-IRES-Cre	ME
751217510	455.1561176776886	0.0195258258062824	-52.06602266099718	0.0527218729257583	14.08541774749756	1.8554422640439825	0.0009199999999999	Sst-IRES-Cre	MET
705112937	192.656084895134	0.0124858369003332	-74.08390808105469	0.2260616570711136	14.32812523841858	2.0037916814164896	0.000625	Sst-IRES-Cre	MET
723487593	125.62499940395357	0.0092620399126639	-74.31482791900635	0.0472767129540443	22.84375	1.3981609486191755	0.0003333333333333	Pvalb-IRES-Cre	MET
333785962	107.187502086	0.00795370402992	-75.8493499756	0.106533244252	14.78125	1.29225327671	0.0002825	Pvalb-IRES-Cre	ME
837675888	141.79694652557373	0.0103401663735746	-75.3329610824585	0.0379354953765869	26.356250762939453	1.7125875437786595	0.00048	Sst-IRES-Cre	MET
662580082	101.71885788440704	0.0067453631035239	-71.24433135986328	0.0200026407837867	20.0	1.4160993742531152	0.00045	Pvalb-IRES-Cre	MET
808479620	96.00002318620682	0.0057531159920799	-69.70607223510743	0.0535699650645256	23.965625762939453	1.7397625806361634	0.0003999999999999	Pvalb-IRES-Cre	MET
751250310	159.68741476535797	0.0184036807993427	-66.42203903198242	0.1921246796846389	41.93124771118164	2.595716896237181	0.0006	Sst-IRES-Cre	MET
685714311	282.1875214576721	0.0262017691340521	-65.23853641086154	0.1614067703485489	28.3125	2.18772573305633	0.0006000000000001	Sst-IRES-Cre	MET
717646732	80.93753457069397	0.0068735424517138	-62.55373975965712	0.0465764515101909	27.362499237060547	1.4540696114909166	0.00032	Pvalb-IRES-Cre	MET
797748111	178.40620875358582	0.0108603014850493	-72.32065277099609	0.031924232840538	26.575000762939453	3.086394015361189	0.0008599999999999	Vip-IRES-Cre	MET
710847377	167.18745231628418	0.0102252227083372	-69.07140757242838	0.1506187170743942	20.487499237060547	1.7303026718744736	0.0003839999999999	Sst-IRES-Cre	MET
754502546	96.24996036291122	0.006183902662316	-68.9409047907049	0.0355996787548065	36.58125305175781	1.728765116945161	0.00046	Pvalb-IRES-Cre	MET
679226264	222.34386205673212	0.0134281354761616	-73.46302740914481	0.0811766907572746	11.348215103149414	2.3290551996135647	0.0005057142857143	Vip-IRES-Cre	MET
839551898	352.21850872039795	0.0234769076871664	-72.11779135244863	0.1003952100872993	15.317857776369369	1.8731169969444503	0.0007114285714285	Sst-IRES-Cre	MET
679512991	157.49987959861755	0.0183154585581382	-76.04053150523792	0.1724283248186111	26.47916984558105	2.321748420000736	0.0006266666666666	Sst-IRES-Cre	MET
490908575	97.6562127471	0.00404164894382	-77.577545166	0.0901973471045	9.76875019073	1.18737619208	0.000244	Sst-IRES-Cre	ME
396274594	122.187457979	0.00596364380491	-75.7397460938	0.0110582625493	31.609375	1.34666814065	0.00033	Pvalb-IRES-Cre	ME
711838627	143.12511682510376	0.012159297518122	-61.948956383599175	0.1130132228136062	45.29375076293945	2.0003027939232783	0.000456	Sst-IRES-Cre	MET
705817510	157.0313572883606	0.0157452940390645	-73.08829650878906	0.2780622541904449	30.518749237060547	2.0791123040901907	0.0004479999999999	Sst-IRES-Cre	MET
704531371	194.2188143730164	0.018405925805767	-75.83770682594992	0.1326251924037933	29.232954025268555	1.911042753821324	0.0005	Sst-IRES-Cre	MET
753847212	226.0935753583908	0.0302804846318835	-50.13717963478782	0.1142326965928077	25.395313262939453	2.370700482955902	0.0007049999999999	Sst-IRES-Cre	MET
759909292	230.4685413837433	0.0306094172907304	-74.03431129455566	0.0059739090502262	26.23124885559082	2.314791442564978	0.0005199999999999	Sst-IRES-Cre	MET
755444656	95.82380205392838	0.0067920513160022	-73.50820350646973	0.0072822854854166	16.081249237060547	1.4566496006446374	0.00036	Pvalb-IRES-Cre	MET
576285618	209.531366825	0.0122136145643	-70.4438476562	0.0356827564538	46.6375007629	2.83820895781	0.00062	Vip-IRES-Cre	ME
760507316	352.0454168319702	0.02542551222657	-65.24479467218572	0.1020446717739105	44.0	4.08063220144126	0.00074	Vip-IRES-Cre	MET
481127348	118.437498808	0.00628468100861	-74.4163742065	0.0252852868289	16.6124992371	1.69673334062	0.000397	Pvalb-IRES-Cre	ME
718875577	113.74995857477188	0.0085508389628449	-73.02782964706421	0.0346488580107688	34.328128814697266	1.7289693256358711	0.0004599999999999	Pvalb-IRES-Cre	MET
710912956	204.2187601327896	0.0242739636473157	-62.277711050851	0.0598459132015705	16.76171875	2.052680530523576	0.0008	Sst-IRES-Cre	MET
769772476	157.3435515165329	0.0129206312414528	-66.43248901367187	0.0251776278018951	25.26249885559082	1.809461759526876	0.00048	Sst-IRES-Cre	MET
823290814	66.46876782178879	0.0068101793926223	-73.15793054754084	0.0336737595498561	25.025001525878903	1.589401237855527	0.00034	Pvalb-IRES-Cre	MET
488688580	78.437499702	0.00511572832682	-61.8983535767	0.0355323664844	13.015625	1.29545815393	0.0002925	Pvalb-IRES-Cre	ME
741960645	163.9062762260437	0.0142218013526531	-64.13241052627563	0.1294808983802795	29.534374237060547	1.7503324353566745	0.00047	Sst-IRES-Cre	MET
711338953	86.71874552965164	0.0059867768346625	-73.19980080922444	0.0362096652388572	30.125	1.8262390394835128	0.0004799999999999	Sst-IRES-Cre	MET
759532491	171.4063584804535	0.0144857190455548	-75.85107803344727	0.0784408971667289	22.30624961853028	2.887419202082516	0.0007199999999999	Vip-IRES-Cre	MET
718654414	94.37507390975952	0.0083857429826135	-71.82770191539417	0.0499695986509323	16.075000381469728	1.768749518005642	0.0003719999999999	Pvalb-IRES-Cre	MET
760368080	370.46870589256287	0.0344941819122315	-68.59348487854004	0.1675648391246795	8.375	1.902467576728952	0.00072	Sst-IRES-Cre	MET
688958418	225.78124701976776	0.015249884681331	-72.03980560302735	0.1022044345736503	24.89583396911621	2.064615908089355	0.0005133333333332	Sst-IRES-Cre	MET
579414994	127.343550324	0.0127790968198	-64.3266830444	0.0147597705945	24.3812503815	1.46338529759	0.000336	Pvalb-IRES-Cre	ME
809110485	192.8436160087585	0.0150816964050949	-75.11262969970703	0.0623130239546299	25.712501525878903	1.545415808243841	0.0004199999999999	Sst-IRES-Cre	MET
772000727	224.7813045978546	0.0225036248455255	-65.11718958074397	0.17398302257061	36.265625	2.164672033976896	0.0006299999999999	Sst-IRES-Cre	MET
750783451	275.6250202655792	0.026251278594039	-59.86487293243408	0.1065391600131988	7.250000476837158	2.1809989015858853	0.0006799999999999	Sst-IRES-Cre	MET
836512731	178.18740010261536	0.0095067565359014	-60.28251162442294	0.0356541834771633	29.256250381469727	1.4160194987023085	0.0003499999999999	Pvalb-IRES-Cre	MET
601803754	176.53851211071014	0.0213919570651969	-65.99248123168945	0.2126844674348831	36.234375	1.8377731602254983	0.0004049999999999	Sst-IRES-Cre	MET
847834091	381.0313045978546	0.0344704314304079	-72.32076009114583	0.0947292074561119	16.533594131469727	2.864989967385	0.0006524999999999	Vip-IRES-Cre	MET
504605677	208.906129003	0.0175985975541	-71.252166748	0.029213283211	25.1937503815	2.08599714906	0.00048	Sst-IRES-Cre	ME
757894130	277.3014307022095	0.0232777691707757	-56.96581353081597	0.0220813918858766	23.293750762939453	2.2178588329013835	0.00071	Sst-IRES-Cre	MET
718654456	144.99995112419128	0.0088487169832617	-69.28906141008649	0.0248481053858995	26.895835876464844	1.7801316624830728	0.0004066666666666	Pvalb-IRES-Cre	MET
657673212	321.24999165534973	0.0251064133767213	-63.23344230651856	0.2385178357362747	7.34375	2.065818119889223	0.0007	Sst-IRES-Cre	MET
718564349	192.1873837709427	0.0145121954348968	-78.65928649902344	0.0374945774674415	20.97916603088379	1.9134178260461097	0.0005600000000001	Sst-IRES-Cre	MET
753691665	263.2812261581421	0.0143640351159013	-73.25174882676866	0.1516984701156616	28.933334350585938	1.9935760627392327	0.0005333333333333	Sst-IRES-Cre	MET
779979799	243.31249296665192	0.0166475426252684	-68.47013346354167	0.0657364279031753	30.818750381469727	3.6699299588685546	0.0006999999999999	Vip-IRES-Cre	MET
831179799	199.218824505806	0.0112895081888369	-62.27068710327149	0.1295753717422485	47.234375	2.7351655255827843	0.00052	Vip-IRES-Cre	MET
740731933	406.2499701976776	0.0291698756988649	-67.00869835747613	0.0975345149636268	21.06875228881836	1.4519332084488952	0.0007399999999999	Sst-IRES-Cre	MET
763063326	84.75009351968765	0.0062443142633796	-70.195313673753	0.0089467596262693	31.106250762939453	1.4089237880066037	0.00034	Pvalb-IRES-Cre	MET
715148321	225.3125011920929	0.0120804160479983	-60.410286373562286	0.0148455929011106	31.61250305175781	2.371820067851929	0.0005199999999999	Vip-IRES-Cre	MET
646786083	81.7188248038292	0.0064146040548754	-74.29256057739258	0.0815518870949745	26.1875	1.474522802983564	0.0003449999999999	Pvalb-IRES-Cre	MET
729148452	186.8753284215927	0.0224838670794676	-61.39401741027832	0.0080716265365481	36.96875381469727	2.3906774604534857	0.00062	Sst-IRES-Cre	MET
716729379	227.34354436397552	0.0130635070379752	-78.33088684082031	0.071868859231472	33.046875	2.67443874907715	0.00078	Vip-IRES-Cre	MET
693144614	201.40621066093445	0.012684762632312	-63.34434254964193	0.0752353742718696	33.609375	3.042382080266697	0.000635	Vip-IRES-Cre	MET
638176297	249.21871721744537	0.016936961761364	-74.32632690429688	0.0591136738657951	9.568750381469728	2.5585279781503942	0.000624	Vip-IRES-Cre	MET
722897963	132.49999284744263	0.0064236722809154	-75.25810623168945	0.0360205844044685	24.8828125	1.6037136410225463	0.0003999999999999	Pvalb-IRES-Cre	MET
706628654	218.5937464237213	0.014117803713951	-70.00366306304932	0.046825211495161	57.69791793823242	1.8410465098519653	0.0006533333333333	Sst-IRES-Cre	MET
515296303	121.87499553	0.0065571965355	-78.0653152466	0.0424211397767	19.0572910309	1.52035030048	0.00035	Pvalb-IRES-Cre	ME
718474288	254.68748807907104	0.0195220691529318	-67.975095960829	0.0784246176481247	35.1875	1.985000377690672	0.00056	Sst-IRES-Cre	MET
834677809	234.40630733966827	0.0135007701718216	-66.92789112437855	0.0609934590756893	24.95625114440918	2.0304024671101035	0.00052	Sst-IRES-Cre	MET
567446579	239.062532783	0.00766254235503	-79.047454834	0.0187394954264	22.78125	1.24919444105	0.000331428571429	Pvalb-IRES-Cre	ME
713116724	98.12498092651369	0.0084993467812744	-58.13002243041992	0.0268977917730808	25.09375	1.6360082429644127	0.0004	Sst-IRES-Cre	MET
745040951	66.56255573034286	0.0069057067619931	-60.24536323547363	0.0548029877245426	0.1758928596973419	1.7484352235756553	0.0003857142857142	Pvalb-IRES-Cre	MET
796666943	293.4374511241913	0.0122032935472959	-76.52695274353027	0.0386551134288311	12.13437557220459	3.157388176864094	0.00089	Vip-IRES-Cre	MET
727034950	330.1559388637543	0.0263935592884405	-69.39041646321614	0.0999899581074714	0.3462499678134918	1.9145412093425307	0.000524	Sst-IRES-Cre	MET
753945691	248.5938966274261	0.0188784538661243	-71.08454036712646	0.1532951593399047	29.24374961853028	1.758577217395297	0.0005	Sst-IRES-Cre	MET
762670171	73.90613108873367	0.0061750825824247	-69.1490577697754	0.046387180685997	27.5625	1.410774050137318	0.00034	Pvalb-IRES-Cre	MET
698027101	78.28132063150406	0.0075949462891059	-82.20473534720284	0.0483585074543952	4.4125	1.27835336581806	0.000304	Pvalb-IRES-Cre	MET
680553572	222.81253337860107	0.0131187648107286	-69.66300201416016	0.136843204498291	35.234375	3.514676379484015	0.0005674999999999	Vip-IRES-Cre	MET
650128484	136.24995946884155	0.0088445664478543	-65.51408386230469	0.0181673541665077	23.287500381469727	1.94910968073408	0.000492	Pvalb-IRES-Cre	MET
648080486	295.94358801841736	0.0132439409059995	-66.66343129475912	0.0642673149704933	32.296875	3.758367186459408	0.0005899999999999	Vip-IRES-Cre	MET
750783593	174.0623414516449	0.0134435381426691	-69.26740010579427	0.0382756702601909	17.650001525878906	1.5702104478747976	0.0004799999999999	Sst-IRES-Cre	MET
714517612	310.6249272823334	0.0100885216074408	-53.27796401977539	0.0738482251763343	57.375	3.229235552352573	0.00048	Vip-IRES-Cre	MET
752086133	214.9999588727951	0.0202907934994287	-61.07991933822632	0.329255074262619	41.05624771118164	1.846941535198029	0.0005199999999999	Sst-IRES-Cre	MET
653790329	369.8436617851257	0.0155791533664475	-56.496695041656494	0.0240236669778823	29.53125190734864	3.7050660235664594	0.0008799999999999	Vip-IRES-Cre	MET
772476028	204.28137481212616	0.0269452604032315	-67.94495544433593	0.1811651736497879	14.021875381469728	1.9916569926649497	0.0006099999999999	Sst-IRES-Cre	MET
789179519	234.562486410141	0.0199359149040939	-62.11911506652832	0.0729028508067131	28.306251525878903	2.863964141668405	0.0008799999999999	Vip-IRES-Cre	MET
487640196	86.5623876452	0.00523181482334	-70.4189300537	0.0272234305739	20.5437507629	1.25572440539	0.0003	Pvalb-IRES-Cre	ME
666209423	130.07813692092896	0.0180681025457698	-63.46619953828699	0.1682061851024627	25.45833396911621	1.839642512222798	0.0004866666666665	Sst-IRES-Cre	MET
497560724	128.124922514	0.0104505657191	-75.439125061	0.02735039033	38.5078125	2.11028678391	0.000445	Sst-IRES-Cre	ME
648121494	237.5000268220901	0.0176196441867831	-63.133929116385325	0.0453792475163936	32.72916793823242	3.138820981895338	0.0007066666666667	Vip-IRES-Cre	MET
695266455	281.0937762260437	0.016392629729857	-64.18955421447754	0.0449668578803539	11.130208651224772	2.1684417179324345	0.0007133333333333	Vip-IRES-Cre	MET
716000413	210.7812464237213	0.0077500996590947	-69.88109471247746	0.0691739842295646	36.38541793823242	3.6340686781633935	0.0008333333333333	Vip-IRES-Cre	MET
648137894	211.0937386751175	0.01395899517865	-72.15449237823486	0.0896122381091117	25.23437595367432	3.244200447447413	0.00074	Vip-IRES-Cre	MET
658418858	126.87492370605467	0.005562609713016	-70.69981384277344	0.0526046603918075	23.2890625	1.402969299991489	0.00033	Pvalb-IRES-Cre	MET
720170155	116.40605330467224	0.0100272363353391	-78.1051664352417	0.0758513137698173	31.0625	2.008907219517805	0.00056	Sst-IRES-Cre	MET
839101611	163.75014185905457	0.0154964467483541	-75.04373030229048	0.0621556043624877	36.92708587646485	1.6234682485336964	0.0004399999999999	Sst-IRES-Cre	MET
713723052	264.6876573562622	0.0137503427146926	-65.58123694525824	0.0116218291223049	28.99374961853028	3.452783478927806	0.000876	Vip-IRES-Cre	MET
716008621	277.49988436698914	0.0094162434437477	-74.51353200276692	-0.0004083110252395	18.762500762939453	3.8316025241292095	0.0009079999999999	Vip-IRES-Cre	MET
758262960	214.5313173532486	0.0104025300404523	-76.0337871975369	0.0678472220897674	21.971874237060547	3.1180283786380967	0.00084	Vip-IRES-Cre	MET
682454193	68.12499463558197	0.0056447286969563	-79.43740012428977	0.2183183282613754	13.9375	1.584438536100285	0.0003699999999999	Pvalb-IRES-Cre	MET
705268919	141.56261086463928	0.011980808549205	-71.08464584350585	0.0733695924282074	33.125003814697266	2.3951604181753425	0.0005199999999998	Sst-IRES-Cre	MET
704482491	223.43748807907104	0.0236512148597699	-67.32769536972046	0.2747314572334289	52.01562881469727	1.969349018503528	0.0004999999999999	Sst-IRES-Cre	MET
703286461	179.5312464237213	0.0254452802386372	-63.14460548987756	0.058883000165224	43.59999847412109	2.29927574324689	0.0005679999999999	Sst-IRES-Cre	MET
700484799	316.4062798023224	0.0190441051677431	-62.80222998725044	0.0482179224491119	25.84375	3.299963100341951	0.0009000000000001	Vip-IRES-Cre	MET
804957376	175.7497787475586	0.0180058981501571	-69.11968013218471	0.0283615104854106	32.282814025878906	1.962152532874179	0.00061	Sst-IRES-Cre	MET
501730497	259.218871593	0.0293240666305	-66.9698867798	0.204253703356	38.7312507629	2.3265251738	0.000632	Sst-IRES-Cre	ME
642821317	358.14744234085083	0.0215699231321633	-47.60205523173014	0.0283502303063869	31.368750381469727	3.1621471503626246	0.000668	Vip-IRES-Cre	MET
686075082	109.2187836766243	0.008552023232306	-73.57199443470348	0.069827526807785	5.928571224212647	1.533979242505075	0.0004714285714285	Sst-IRES-Cre	MET
568790226	77.1428868175	0.00550853169417	-72.8288879395	0.0403395295143	24.296875	1.51587713242	0.000325	Pvalb-IRES-Cre	ME
678677721	210.62487363815308	0.0091575103333066	-63.94253076825823	0.0636062324047088	47.921875	3.066319965709025	0.00052	Vip-IRES-Cre	MET
769772762	262.49998807907104	0.0253873715640415	-69.14307975769043	0.1674516648054123	37.57500457763672	2.0114312656398217	0.0005	Sst-IRES-Cre	MET
753798363	145.93733847141266	0.0085022964964287	-68.82608710394965	0.0457352250814437	36.61250305175781	1.5015551713263529	0.0003799999999999	Sst-IRES-Cre	MET
714378460	265.46889543533325	0.0222838142215199	-58.63665199279785	0.0303550474345684	28.09375	3.3261735421844283	0.000645	Vip-IRES-Cre	MET
647105759	165.4687523841858	0.0113637747841131	-68.25223092471852	0.1074441820383071	45.93750381469727	1.6311049745791646	0.00039	Sst-IRES-Cre	MET
839519458	295.4375743865967	0.0264947110687724	-68.08528442382813	0.1309194713830948	5.458333492279053	2.218376832992682	0.0007333333333333	Sst-IRES-Cre	MET
747056356	152.6561677455902	0.013383554544583	-84.5540246963501	0.0726589560508728	-4.265625	1.6471516833734343	0.0007199999999999	Sst-IRES-Cre	MET
593054951	335.156291723	0.0174329049852	-60.3692359924	0.0201520640403	24.4479160309	2.93182283689	0.000793333333333	Vip-IRES-Cre	ME
728059122	62.656328082084656	0.0056244337319098	-76.96127198871814	0.0123509522527456	24.80208396911621	1.459665700485618	0.0003466666666666	Sst-IRES-Cre	MET
477490421	81.8749666214	0.00634786593628	-70.4622573853	0.0586271584034	25.2875003815	1.24022924333	0.000238	Pvalb-IRES-Cre	ME
488230133	105.223104358	0.00520458944179	-75.937713623	0.0324520803988	27.0937519073	1.19463832153	0.0002675	Pvalb-IRES-Cre	ME
721693943	78.59386503696442	0.0055706935161717	-66.54598575168185	0.0430679395794868	34.724998474121094	1.528624941936669	0.0003	Pvalb-IRES-Cre	MET
637365495	264.1927301883697	0.0144481123109201	-74.26967989165207	0.0214181635528802	15.593750953674316	3.0913276255067976	0.0007199999999999	Vip-IRES-Cre	MET
713747705	243.90636384487152	0.0154660363671502	-63.22350463867188	0.0507734231650829	34.36718845367432	2.6865799107159605	0.0006649999999999	Vip-IRES-Cre	MET
839527672	203.28131318092343	0.0222894135005503	-64.2911823272705	0.1220923736691474	38.03750228881836	2.0301030281998345	0.00046	Sst-IRES-Cre	MET
669166845	176.5623837709427	0.0109680719647805	-66.24523289998372	0.1203757002949714	17.018749237060547	1.812369711117458	0.000628	Sst-IRES-Cre	MET
759901440	368.2986199855805	0.0387509959092144	-49.12276291847229	0.1900486648082733	70.39375305175781	2.3901208349016083	0.00068	Sst-IRES-Cre	MET
760016133	192.5000548362732	0.0273851251166524	-52.08035682229435	0.0175937321037054	30.60468864440918	1.818368617651472	0.00058	Sst-IRES-Cre	MET
758263047	75.46862959861755	0.0082245948526632	-68.02704366048177	0.0047601736150681	18.78125	1.581976554603394	0.00034	Pvalb-IRES-Cre	MET
722799879	97.5000336766243	0.0081431091583844	-67.43775634765625	0.074449598789215	28.59375127156576	1.3462011892413372	0.0003333333333333	Sst-IRES-Cre	MET
659934473	305.3126037120819	0.0292279069222178	-68.43358294169109	0.1006885766983032	33.01875305175781	2.546143192564873	0.0007319999999999	Sst-IRES-Cre	MET
674221323	108.28128457069396	0.0071037470800376	-71.42564264933269	0.0303879417479038	20.5	1.5555686838709226	0.0004149999999999	Pvalb-IRES-Cre	MET
764726542	123.62518161535264	0.0068043631785819	-67.0472625732422	0.0237057115882635	27.50000190734864	1.326317099910264	0.0003199999999999	Pvalb-IRES-Cre	MET
657845523	333.75006914138794	0.0269910753442917	-65.35233306884766	0.0331041999161243	17.953125	2.197747913615105	0.0005999999999999	Sst-IRES-Cre	MET
713886995	188.1251037120819	0.0099134586388332	-65.45186350895808	0.0509108901023864	50.01562881469727	2.549029208310692	0.0004999999999999	Vip-IRES-Cre	MET
750824726	186.24991178512573	0.0140410730511101	-70.34461975097656	0.0399336889386177	14.024999618530272	1.8631289210246744	0.00054	Sst-IRES-Cre	MET
808529175	234.2812418937683	0.0377020143552858	-59.85626993952571	0.068335048854351	45.42812347412109	2.525597015576741	0.000575	Sst-IRES-Cre	MET
716492058	252.9686987400055	0.0130490605646693	-68.25249036153157	0.0145461857318878	31.40625	3.615068394047825	0.0008	Vip-IRES-Cre	MET
754822442	226.09347105026245	0.0207749171290373	-62.61127641465929	0.1719907820224762	21.61250114440918	1.7421946151465817	0.00052	Sst-IRES-Cre	MET
797740330	259.08008217811584	0.0192873972732173	-62.36843083699544	0.0405519604682922	18.73124885559082	3.0180838832738544	0.0009199999999999	Vip-IRES-Cre	MET
716270892	225.1562476158142	0.0140661454001292	-67.96398849487305	0.1302956193685531	32.07500076293945	2.710024275631277	0.000516	Vip-IRES-Cre	MET
710757677	212.42183446884155	0.0183597356541801	-61.86821140962488	0.2365429699420929	51.9375	2.192995042387611	0.0004599999999999	Sst-IRES-Cre	MET
898682154	198.0288177728653	0.0083827362741787	-63.80914981548603	0.1345336139202118	27.950000762939453	2.201876302617088	0.0004199999999999	Vip-IRES-Cre	MET
676826415	386.4062428474426	0.0169844861362968	-70.28607788085938	0.0546528697013855	19.22916984558105	3.781729614289366	0.0010933333333333	Vip-IRES-Cre	MET
692522289	199.84374940395355	0.0106544670103433	-45.92196833292643	0.0166758056730031	35.250003814697266	2.179162727810639	0.000692	Sst-IRES-Cre	MET
594611511	265.624821186	0.0159721313863	-59.9242706299	0.0372504517436	42.6979179382	2.95306030021	0.000586666666667	Vip-IRES-Cre	ME
778194234	170.40622234344482	0.0197043414763124	-56.81200675964355	0.159436747431755	38.439064025878906	2.2889756102329835	0.0005799999999999	Sst-IRES-Cre	MET
649219388	325.1561224460602	0.0203742535570478	-61.04394048055013	0.051537849009037	-0.40625	2.8548961100320187	0.0010599999999998	Vip-IRES-Cre	MET
810634557	190.00019133090973	0.0110913070643828	-75.15791320800781	0.115047201514244	25.96875	2.348596138074552	0.00048	Vip-IRES-Cre	MET
730803523	190.3124898672104	0.0116513892542204	-76.59268327192827	0.045260515064001	24.01785659790039	3.079740365972416	0.0007542857142857	Vip-IRES-Cre	MET
604646725	256.2499046325684	0.0182203132340003	-70.04945057836072	0.0335381180047988	27.057292302449543	2.7959862602458827	0.0006466666666666	Vip-IRES-Cre	MET
475049291	218.281373382	0.022092929864	-67.525428772	0.0656530335546	20.2937507629	1.69213231443	0.000462	Sst-IRES-Cre	ME
679578958	199.0624964237213	0.0115276094489975	-70.48318317958287	0.0360926650464534	14.008928298950195	2.436578260443465	0.0004942857142857	Vip-IRES-Cre	MET
703565134	111.71890050172806	0.0084840415700399	-73.82059936523437	0.0311542619019746	30.00000190734864	1.5723945496185463	0.0003999999999999	Sst-IRES-Cre	MET
758263126	227.96878218650812	0.0122050131073968	-76.81930465698242	0.1789468377828598	14.250000953674316	2.3831948824532505	0.00048	Vip-IRES-Cre	MET
750472545	170.78112065792084	0.0216247337223534	-63.3838680267334	0.0169515497982502	16.362499237060547	2.1044432719534405	0.0006599999999999	Sst-IRES-Cre	MET
807570785	166.90631210803986	0.0112144782396043	-71.30158920288086	0.0204209852963686	15.615625381469728	2.035999763069984	0.00052	Sst-IRES-Cre	MET
861785444	423.970490694046	0.0384362541522394	-65.37392679850261	0.0953343585133552	26.540626525878903	2.29557298093311	0.0007399999999999	Sst-IRES-Cre	MET
720579946	199.68757033348083	0.0160816910153387	-73.54622421264648	0.0361218638718128	20.76250095367432	1.861460383187088	0.0005179999999999	Sst-IRES-Cre	MET
722931053	90.93765169382095	0.0068393147527407	-79.2258472442627	0.0515658296644687	34.1640625	1.63262080251533	0.0003249999999999	Pvalb-IRES-Cre	MET
592833901	215.781241655	0.0125162046638	-76.4824295044	0.00799952633679	27.1124992371	2.84049637118	0.00076	Vip-IRES-Cre	ME
811699569	129.0939301252365	0.0096331213258757	-67.82475891113282	0.0509332381188869	38.38750457763672	3.182912115089217	0.0005799999999999	Vip-IRES-Cre	MET
848334195	138.7186348438263	0.0129543685451805	-66.32573353160511	0.0372401364147663	25.418750762939453	1.734486925757752	0.00046	Sst-IRES-Cre	MET
808824183	226.12498700618744	0.0237800511468069	-72.28171611967541	0.2086779028177261	40.61249923706055	2.6798801284381883	0.0006199999999999	Sst-IRES-Cre	MET
807611768	91.89901500940324	0.006477105406713	-77.26031494140625	0.0125071965157985	36.68437576293945	1.793775158410818	0.0004699999999999	Sst-IRES-Cre	MET
795749753	176.9484579563141	0.0169690446639154	-72.9625415802002	0.0687083154916763	37.24687576293945	1.986221069952231	0.00051	Sst-IRES-Cre	MET
688926074	191.56253337860107	0.0152995625333069	-75.52512979507446	0.1577576845884323	34.390625	1.9376684498119467	0.00051	Sst-IRES-Cre	MET
648547708	209.68753099441528	0.0085893678993231	-64.91291332244873	0.0118551785126328	30.40625190734864	1.6625460101305318	0.00038	Pvalb-IRES-Cre	MET
685624703	154.06237542629242	0.0138542100069376	-73.07394561767578	0.0574376508593559	41.02343845367432	1.8047617260238875	0.0004899999999999	Sst-IRES-Cre	MET
750472575	222.81263768672943	0.0262987369840232	-69.30830618051382	0.1964987516403198	21.525001525878903	1.948286219404597	0.0005866666666666	Sst-IRES-Cre	MET
567987585	129.843786359	0.00773878553554	-71.0059814453	0.0217410381883	32.6500015259	1.22283142243	0.000292	Pvalb-IRES-Cre	ME
817048962	282.6952934265137	0.0314991998989733	-60.43568253517151	0.0822977945208549	25.162500381469727	1.756045510946021	0.00052	Sst-IRES-Cre	MET
819793287	397.7468013763428	0.0339601674558463	-58.52938461303711	0.0365187190473079	15.578750610351562	2.026771873034219	0.000664	Sst-IRES-Cre	MET
807349639	166.68765246868134	0.0131711447076064	-70.14819946289063	0.0346875488758087	38.19375228881836	2.0418209709768056	0.0004399999999999	Sst-IRES-Cre	MET
588189066	112.343676388	0.00647534408961	-72.3287582397	0.0737296938896	33.6062507629	1.41141156271	0.000336	Pvalb-IRES-Cre	ME
803417493	188.6250227689743	0.015472073609192	-72.14489121870561	0.0857910588383674	33.5625	2.016000356860608	0.00052	Sst-IRES-Cre	MET
679447960	102.18749940395357	0.0073003660811251	-67.87344296773274	0.0533358715474605	33.74479293823242	1.4764695367293184	0.0003499999999999	Sst-IRES-Cre	MET
760876441	328.28137278556824	0.022847214978108	-67.2839838663737	0.0157532077282667	13.100000381469728	2.0945816249650564	0.0006599999999999	Sst-IRES-Cre	MET
750472605	413.5797321796417	0.0238562183811949	-64.65442258661443	0.0798879265785217	31.318750381469727	1.8838002537981169	0.00062	Sst-IRES-Cre	MET
899755423	124.562568962574	0.0094451161582296	-80.0891098022461	0.0521227419376373	37.44792175292969	2.923662222914283	0.0006333333333333	Vip-IRES-Cre	MET
491031969	54.5313283801	0.00496848382993	-81.3541183472	0.031324185431	12.1875	1.36474011426	0.000291666666667	Pvalb-IRES-Cre	ME
659598755	338.90631794929504	0.0300461169476648	-53.1195068359375	0.1180696710944175	-17.45833396911621	3.4279677052370467	0.0011133333333332	Sst-IRES-Cre	MET
321023397	92.3437848687	0.00620069469131	-74.0444412231	0.054768987	23.3937492371	1.56444239219	0.000375	Pvalb-IRES-Cre	ME
646393258	269.68759298324585	0.0252187126964665	-66.09214973449707	0.1137759909033775	36.54375076293945	2.0212460220970043	0.0005599999999999	Sst-IRES-Cre	MET
715140522	262.3438537120819	0.0171789655025307	-53.75915615375225	0.104103684425354	56.83124923706055	3.786446387333543	0.0005639999999998	Vip-IRES-Cre	MET
794865067	205.1248848438263	0.0123084027191831	-69.27951126098633	0.0146524235606193	24.912500381469727	2.18374689813835	0.00051	Sst-IRES-Cre	MET
780766638	213.3437693119049	0.0213417468768464	-64.71846042979847	0.043771669268608	26.371875762939453	3.6151508603418665	0.00087	Vip-IRES-Cre	MET
760294832	345.51408886909485	0.0317408430959666	-63.39776141826923	0.0924895107746124	33.75	1.808534890048221	0.0005399999999999	Sst-IRES-Cre	MET
746999234	208.1252932548523	0.0230976239033945	-69.5771650834517	0.0604924894869327	29.353126525878903	2.587924076558576	0.00073	Sst-IRES-Cre	MET
892472771	71.68746739625931	0.0055856547636904	-67.61132685343425	0.0099288867786526	27.775001525878903	1.4339564322118363	0.0002999999999999	Pvalb-IRES-Cre	MET
681586118	193.5938149690628	0.0134341614902598	-82.61799458095005	0.157364547252655	1.129465103149414	2.105888436281677	0.0005366666666667	Vip-IRES-Cre	MET
707333574	207.34374225139612	0.0185454405538288	-69.93831176757813	0.0750065594911575	25.20833396911621	1.8879421748906104	0.0005066666666666	Sst-IRES-Cre	MET
837578188	106.00009560585022	0.0072107107111754	-65.62808380126953	0.0252697728574275	25.174999237060547	1.4361326878380414	0.00036	Pvalb-IRES-Cre	MET
795684301	378.15624475479126	0.0154805467116285	-74.17854794588956	0.5383031368255615	30.49791717529297	1.6454065435387044	0.0005333333333333	Sst-IRES-Cre	MET
763014609	80.93757182359695	0.0061439870970592	-77.31389132412997	0.014934629201889	23.93124961853028	1.4148113499938724	0.00034	Pvalb-IRES-Cre	MET
716746196	264.6874785423279	0.0219275776369201	-65.56248304578993	0.0816984698176384	26.34375190734864	3.44309022445765	0.0006266666666666	Vip-IRES-Cre	MET
728772052	175.1563847064972	0.0177590721497566	-56.2559822400411	0.3380088806152344	49.14285659790039	2.0942681433764805	0.0004457142857143	Sst-IRES-Cre	MET
772517332	104.54682260751724	0.0075770815703039	-60.03927652459396	0.0304868668317794	18.418270111083984	1.7160201404253266	0.0003953846153846	Pvalb-IRES-Cre	MET
823651799	194.0937042236328	0.0131557378649954	-45.16148875309871	0.0136833740398287	35.57083511352539	1.9530288143871648	0.0004933333333333	Pvalb-IRES-Cre	MET
808537562	305.1249086856842	0.0334051264252722	-62.55581932067871	0.0561018101871013	16.631250381469727	1.936929647883181	0.0006600000000001	Sst-IRES-Cre	MET
750824926	194.06260550022125	0.0193614492394831	-69.1171137491862	0.026607496663928	15.293749809265137	2.033752929395465	0.0005733333333333	Sst-IRES-Cre	MET
765881829	127.40641832351685	0.0091037200578792	-66.56211700439454	0.001196568715386	23.506250381469727	1.610049251280849	0.0004	Pvalb-IRES-Cre	MET
598380007	140.937536955	0.00836634365341	-77.6833343506	0.0281159803271	11.140625	1.37028339059	0.000365	Pvalb-IRES-Cre	ME
837127659	95.81241011619568	0.006157135475381	-72.36807022094726	0.0149160865694284	13.456250190734863	1.8770821113218656	0.00042	Pvalb-IRES-Cre	MET
809102827	271.468847990036	0.0478662191041223	-66.3658613725142	0.0115979658439755	25.88125228881836	1.8814455137099133	0.00065	Sst-IRES-Cre	MET
718654972	119.84370648860931	0.008138486949218	-66.48377482096355	0.0046319528482854	22.9375	1.347205210739869	0.0003699999999999	Pvalb-IRES-Cre	MET
754814460	178.9064258337021	0.0166900200847131	-60.10277938842773	0.0919463783502578	1.1333332856496174	2.088566537559831	0.0007199999999999	Sst-IRES-Cre	MET
764726782	60.482922941446304	0.0124885400654244	-72.35156860351563	0.0507029853761196	23.475000381469727	1.47304526187355	0.0004	Pvalb-IRES-Cre	MET
481127932	164.687469602	0.00836385982642	-70.6443557739	0.0220953691751	24.5812492371	1.39711739038	0.000282	Pvalb-IRES-Cre	ME
571379222	64.2188638449	0.00412345426035	-75.560836792	0.0720957666636	17.6687507629	1.42938456801	0.000296	Pvalb-IRES-Cre	ME
779857432	235.5000227689743	0.0266904393218751	-63.78835563659668	0.1088837385177612	14.462499618530272	1.8313514011599188	0.0006199999999999	Sst-IRES-Cre	MET
751226394	280.62495589256287	0.0278191293559632	-53.4318286895752	0.0429723933339118	47.82916641235352	2.790363033231285	0.0007399999999999	Sst-IRES-Cre	MET
719113765	117.96874552965164	0.0099080428777366	-62.83219029353215	0.0415164902806282	22.59375	1.8364772159354013	0.0004799999999999	Sst-IRES-Cre	MET
750833190	138.593852519989	0.0109980772476444	-71.21037292480469	0.1153712794184684	20.6875	1.537147912268059	0.00039	Sst-IRES-Cre	MET
740732467	347.9686677455902	0.0244108727501591	-75.92359585232205	0.164133071899414	29.806251525878903	2.104839328014043	0.0004799999999999	Sst-IRES-Cre	MET
750415413	114.8439347743988	0.0089143601985262	-76.51214790344238	0.029523542150855	20.668750762939453	1.4849974765226552	0.0003599999999999	Sst-IRES-Cre	MET
476753465	230.624958873	0.0161065551535	-72.4381256104	0.217359259725	40.5625038147	1.74971592671	0.0004	Sst-IRES-Cre	ME
849522241	308.2188963890076	0.0288920872299222	-66.56007385253906	0.2341194450855255	-0.065624862909317	1.90761575469795	0.000805	Sst-IRES-Cre	MET
779693640	185.12488901615143	0.0199065982134936	-73.22287680886008	0.1084228828549385	25.76875114440918	1.7233882907828322	0.00058	Sst-IRES-Cre	MET
740675145	312.3437762260437	0.0259087169043914	-67.36138746473524	0.1292774081230163	15.462499618530272	2.112696391351645	0.0008399999999999	Sst-IRES-Cre	MET
759565899	363.7500703334808	0.0223674261647393	-64.47901602352367	0.1388182342052459	36.90833282470703	2.877859767926724	0.0007666666666666	Vip-IRES-Cre	MET
646852171	120.15624344348907	0.0066933070296566	-71.86514458289513	0.0396738462150096	13.5625	1.651578896354497	0.00036	Pvalb-IRES-Cre	MET
649498191	142.03108847141266	0.0124502934291091	-61.91488402230399	0.025639072060585	24.760416666666668	1.9122384464515825	0.00042	Pvalb-IRES-Cre	MET
750210640	216.42056107521057	0.0209928277837066	-66.11378563774957	0.1434142738580703	5.535417079925537	2.029670260397067	0.0006999999999999	Sst-IRES-Cre	MET
574377552	110.781289637	0.00734691213095	-77.3323440552	0.0406029447913	24.234375	1.27418198006	0.000286666666667	Pvalb-IRES-Cre	ME
668175960	235.9376400709152	0.0165693385676516	-72.76742095947266	0.1343991011381149	20.14583396911621	1.881507955798792	0.0005266666666665	Sst-IRES-Cre	MET
754527842	80.78116923570633	0.0073004671556617	-70.4237983010032	0.0371367931365966	24.268749237060547	1.4236128171644191	0.0003199999999999	Pvalb-IRES-Cre	MET
760041059	215.62498807907104	0.0192205579537405	-63.37347984313965	0.055865466594696	27.512500762939453	3.2437379172733865	0.0007399999999999	Vip-IRES-Cre	MET
568757860	280.937343836	0.0196237789069	-69.8247680664	0.102041840553	37.2395820618	2.922998657	0.000513333333333	Vip-IRES-Cre	ME
832515683	136.09382510185242	0.0081720150339509	-70.23610051472981	0.053522054105997	28.762500762939453	1.6139404755288942	0.00038	Pvalb-IRES-Cre	MET
807276131	225.40630400180817	0.0253143633140484	-62.27296170321378	0.1616722345352172	29.30000114440918	1.7238595050953716	0.0005199999999999	Sst-IRES-Cre	MET
669838950	107.9687476158142	0.0067240798444701	-70.91732653449563	0.0610214099287986	13.75	1.5884160158226672	0.00038	Pvalb-IRES-Cre	MET
475549284	95.9821417928	0.00798739146242	-75.1253585815	0.0352624356747	18.1979160309	1.34609102085	0.00032	Pvalb-IRES-Cre	ME
861826664	309.40619111061096	0.0371236847601849	-74.00632823597302	0.0178089048713445	14.251564025878906	1.8428823386922368	0.00064	Sst-IRES-Cre	MET
759762537	256.7188143730164	0.0139193821169857	-62.43556506817158	0.0076390341855585	24.885417302449543	2.8077799744773944	0.0009199999999999	Vip-IRES-Cre	MET
803384938	335.3811800479889	0.0316417919608722	-66.46151263897235	0.2008905559778213	23.78125190734864	1.9005063007371927	0.0005199999999999	Sst-IRES-Cre	MET
689098357	157.0311337709427	0.0107903288422961	-69.21006665910993	0.0855826586484909	12.9375	1.7775879547700215	0.0004085714285714	Sst-IRES-Cre	MET
760893046	164.68752920627594	0.0159727743284445	-74.37515869140626	0.0490479543805122	32.01250457763672	2.115478762087267	0.0005799999999999	Sst-IRES-Cre	MET
500862585	82.03125	0.00540965981332	-72.5131378174	0.0204274095595	28.9562492371	1.39538133123	0.000312	Pvalb-IRES-Cre	ME
714485370	258.1251561641693	0.0248521762310601	-66.14734573364258	0.025890065357089	36.07500076293945	2.978705085671992	0.0005719999999998	Vip-IRES-Cre	MET
639389307	350.0000238418579	0.0141634853541351	-67.93643515450614	0.1231731325387954	13.214844346046448	2.92848844161683	0.0005425	Vip-IRES-Cre	MET
524693113	272.343784571	0.0107707149747	-65.7026062012	0.0799492225051	30.1062507629	3.33142147643	0.000568	Vip-IRES-Cre	ME
682143357	225.625142455101	0.0116818400807399	-75.63928146362305	0.1517186313867569	34.781251695421005	2.4465136700425862	0.0004999999999999	Vip-IRES-Cre	MET
329322109	235.624998808	0.0122822600876	-71.8459243774	0.0870126709342	18.53125	1.50020251036	0.000415	Sst-IRES-Cre	ME
574377603	122.65624851	0.00756211726832	-69.9672317505	0.0115335974842	14.2395849228	1.39500175279	0.000313333333333	Pvalb-IRES-Cre	ME
764890762	88.21883797645569	0.0064511392389427	-70.29846725463867	0.0318537876009941	26.54375267028809	1.4047572935549832	0.0003333333333332	Pvalb-IRES-Cre	MET
716721810	173.43729734420776	0.0131181545894368	-70.9504747390747	0.115431822836399	22.296875	2.873072182041482	0.0005349999999999	Vip-IRES-Cre	MET
729190038	165.0000363588333	0.0194832126084856	-69.41178448994954	0.0815292969346046	34.95000076293945	1.7258835296850674	0.0005319999999999	Sst-IRES-Cre	MET
475549334	85.1562470198	0.00460477781272	-72.2055664062	0.0184759330004	5.2265625	1.31154245461	0.000245	Pvalb-IRES-Cre	ME
778194586	134.6154808998108	0.0146210498350524	-74.63317593661222	0.0232497528195381	2.3343749046325684	1.9062107172025395	0.0005599999999999	Sst-IRES-Cre	MET
694169245	179.84358966350555	0.0115413458048311	-71.69187927246094	0.0387112349271774	30.78125190734864	3.3476866080509384	0.00078	Vip-IRES-Cre	MET
823594655	119.65999007225037	0.0084895376569738	-63.16136081402119	0.0072764991782605	29.028125762939453	1.4661799339512651	0.0003799999999999	Pvalb-IRES-Cre	MET
765808292	76.20524615049362	0.0086468802794727	-60.8914726802281	0.0344561822712421	22.81875228881836	1.561288759514721	0.00038	Pvalb-IRES-Cre	MET
668249770	335.46873927116394	0.0260736277410212	-53.08459608895438	0.0557595342397689	49.34375	2.3373624567652054	0.0005399999999999	Sst-IRES-Cre	MET
656977580	261.4060938358307	0.0170777092425918	-57.2274135242809	0.0232670810073614	17.78472137451172	3.1156077593100897	0.0011222222222221	Vip-IRES-Cre	MET
754781874	219.2186266183853	0.0165072018732408	-67.12211990356445	0.0288136731833219	26.05468940734864	1.7644214918921393	0.000595	Sst-IRES-Cre	MET
720375475	112.0312437415123	0.0077538279419499	-76.1306881374783	0.0076953689567744	30.90625190734864	1.5247838953441524	0.000345	Pvalb-IRES-Cre	MET
660737718	165.7813936471939	0.0330937012578755	-66.35164348895734	0.1405138373374939	35.03125	2.0658413903247306	0.0004949999999999	Sst-IRES-Cre	MET
680791736	218.43749284744263	0.0219475846843947	-68.61925315856934	0.2748260796070099	17.367189407348633	1.7507189624101076	0.00057	Sst-IRES-Cre	MET
756100795	193.75018775463104	0.010976499983143	-73.64819399515788	0.1346013247966766	28.06250190734864	1.5172269046936635	0.0003799999999999	Pvalb-IRES-Cre	MET
718474941	72.65643775463104	0.0073806626639487	-75.54693010118272	0.0116431545466184	32.250003814697266	1.499988049308771	0.00036	Sst-IRES-Cre	MET
714976957	254.37504053115845	0.0245720926452483	-51.32376441955567	0.0424462333321571	28.924999237060547	3.219790913644941	0.000712	Vip-IRES-Cre	MET
753716937	210.7387483119965	0.0174097828531033	-69.15053219265408	0.0228890646249055	30.081249237060547	2.147033600237217	0.0005	Sst-IRES-Cre	MET
809668298	266.73424243927	0.0068782025312113	-75.30155487060547	0.2112330347299575	26.47187614440918	1.4867597473587644	0.00035	Pvalb-IRES-Cre	MET
702082762	145.93765139579773	0.014364926889335	-64.11371765136718	0.0322101935744285	25.46875063578288	2.1664787628290645	0.0005666666666666	Sst-IRES-Cre	MET
727363278	151.7188996076584	0.0142229582137103	-68.77584492076527	0.0442157797515392	26.1953125	1.5932433406771025	0.0003999999999999	Sst-IRES-Cre	MET
899673809	152.4399369955063	0.0086379469357339	-69.46372500332919	0.0406560599803924	37.77708435058594	3.100565218978492	0.0005666666666666	Vip-IRES-Cre	MET
759959254	241.5628284215927	0.0171776769978121	-64.48533248901367	0.0921461433172226	38.47500228881836	1.9211274640971483	0.0004899999999999	Sst-IRES-Cre	MET
764784343	126.0940432548523	0.0071590256841536	-73.89191207885742	0.0043269949965178	32.13750076293945	1.570824653257081	0.0003199999999999	Pvalb-IRES-Cre	MET
763096792	73.5940933227539	0.0087577617837622	-71.51243693033854	0.0877929851412773	12.872917175292969	1.5635182757195496	0.0003466666666666	Pvalb-IRES-Cre	MET
722849501	225.0000387430191	0.0231083555410174	-63.27699890136719	0.0960446149110794	21.693750381469727	2.1988422857601444	0.0008319999999999	Sst-IRES-Cre	MET
657985245	297.9687750339508	0.0187752335575606	-63.83825607299805	0.0309732612222433	3.679687738418579	2.171798039755003	0.0005849999999999	Sst-IRES-Cre	MET
740110050	160.31263768672943	0.0173059855829858	-73.79654069380327	0.1275525540113449	12.964844703674316	1.594006461145582	0.0003674999999999	Sst-IRES-Cre	MET
740134630	278.437614440918	0.0246106899471676	-65.3399076461792	0.0775810107588768	12.845832824707031	2.2615904546488803	0.0007	Sst-IRES-Cre	MET
817188583	213.47354352474213	0.0224169965457919	-67.05092092660757	0.041446927934885	31.043750762939453	2.032597273740412	0.0005999999999999	Sst-IRES-Cre	MET
718196458	140.7812386751175	0.0116465061609167	-77.74561614990235	0.1173262745141983	30.51875076293945	1.833494303792565	0.000532	Sst-IRES-Cre	MET
475057898	212.499886751	0.0248136868715	-73.6112365723	0.274229347706	31.0187530518	2.06676826086	0.000457	Sst-IRES-Cre	ME
756109037	106.40620440244676	0.0086733697460005	-59.43991606576102	0.0411435924470424	17.075000762939453	1.3498244604710734	0.0002999999999999	Pvalb-IRES-Cre	MET
718647025	310.6251060962677	0.0290892552036981	-62.57990036010742	0.0995732694864273	11.890625715255736	1.9775201844321515	0.0006399999999999	Sst-IRES-Cre	MET
837594867	110.24997383356094	0.008589257773576	-75.1254488627116	0.0703111365437507	24.589584350585938	1.5812521953922236	0.0003999999999999	Pvalb-IRES-Cre	MET
688058099	189.8438185453415	0.0138152086415268	-71.49009288441052	0.1260010600090026	12.479167938232422	2.124776110545685	0.0005266666666666	Sst-IRES-Cre	MET
396652279	121.87499553	0.00622241871178	-72.0374526978	0.0594092532992	14.7937498093	1.42970695862	0.000315	Pvalb-IRES-Cre	ME
692793083	252.0312368869781	0.0133608378642223	-61.18623563978407	0.0744350478053093	35.1875	2.4325014891132533	0.00042	Vip-IRES-Cre	MET
772558590	239.84381556510925	0.0237824633129046	-66.70194091796876	0.0516447611153125	30.556251525878903	1.94774821631144	0.0005999999999999	Sst-IRES-Cre	MET
659590916	229.06260192394257	0.0208446954006871	-64.35235769098455	0.0911649540066719	40.125	1.749659464247095	0.00057	Sst-IRES-Cre	MET
501280518	153.281241655	0.00947523482041	-70.6198348999	0.0320168957114	35.6875	1.88929883586	0.000404	Sst-IRES-Cre	ME
817073927	210.5467319488525	0.0249855572479914	-70.26711331881009	0.0716049671173095	42.80937576293945	2.4019868118936145	0.00057	Sst-IRES-Cre	MET
755625739	93.43738108873367	0.0068759518383423	-67.38462018966675	0.0126756662502884	19.71249961853028	1.2624391588952777	0.0003199999999999	Pvalb-IRES-Cre	MET
809332492	189.81242179870603	0.020868089939476	-56.179368019104	0.012423075735569	21.245834350585938	2.201369341692635	0.0006333333333333	Sst-IRES-Cre	MET
674238221	205.1561325788498	0.0128732434555654	-61.00584182739258	0.0523332841694355	26.946428298950195	1.9504268789998287	0.0005371428571427	Sst-IRES-Cre	MET
759443215	172.65623807907104	0.0313047929706281	-54.862413024902345	0.0961623191833496	16.00625228881836	1.845787501472183	0.00054	Sst-IRES-Cre	MET
778178321	153.28136086463928	0.0145935615638155	-69.32685158469461	0.1836299151182174	33.34375	1.9952890673092087	0.0004999999999999	Sst-IRES-Cre	MET
740224788	135.62506437301636	0.0112679528217041	-69.1378002166748	0.0347563400864601	19.70937728881836	2.2585125846393304	0.00062	Sst-IRES-Cre	MET
698035989	115.15621095895769	0.0090214721401439	-61.467985299917366	0.0064055952243506	13.6875	1.6582742098894283	0.0004199999999999	Pvalb-IRES-Cre	MET
750309143	196.9032883644104	0.0197951418143739	-60.81208419799805	0.0772491097450256	7.800000190734863	1.9420695600185107	0.00068	Sst-IRES-Cre	MET
656977690	150.31249821186066	0.010333733764017	-67.9725851579146	0.0267596580088138	26.93750095367432	2.906977584517715	0.0006633333333333	Vip-IRES-Cre	MET
705220380	335.4686498641968	0.0254371479775635	-66.65049489339192	0.0490184649825096	29.21249961853028	2.5495414123212665	0.0006719999999999	Sst-IRES-Cre	MET
834588446	545.5312728881836	0.0329655902144369	-72.56525039672852	0.0404734946787357	35.70416641235352	1.9743499797594688	0.0005	Sst-IRES-Cre	MET
720580383	172.18749225139618	0.0128825987567672	-71.71845626831055	0.0464215353131294	37.9375	2.418054469376282	0.0005599999999999	Sst-IRES-Cre	MET
692498211	167.49991476535797	0.0174624665828238	-73.03472290039062	0.0338187776505947	27.979167302449543	1.7510900516593697	0.00052	Sst-IRES-Cre	MET
755478309	157.3440432548523	0.0089205801325558	-69.91811275482178	0.0214431844651699	21.578125	1.585702651984865	0.0004	Pvalb-IRES-Cre	MET
751947558	200.31222701072693	0.0193594601626027	-65.43500900268555	0.0521050952374935	23.431251525878903	1.882821062811424	0.0005699999999999	Sst-IRES-Cre	MET
728149800	152.03124284744263	0.0132106615711585	-71.15142211914062	0.0575289838016033	26.843751430511475	1.7690498632027096	0.000425	Sst-IRES-Cre	MET
480735016	133.92855227	0.00538341362581	-78.856338501	0.0159220937639	3.3125	1.51661094921	0.000326	Pvalb-IRES-Cre	ME
848334636	230.40618002414703	0.0226667244108334	-72.35991391268644	0.1268783062696457	36.525001525878906	2.108483686276512	0.00048	Sst-IRES-Cre	MET
836529968	80.34373819828033	0.0060402922410268	-69.11055068969726	0.0372079499065876	29.19375228881836	1.5267168172677428	0.00034	Pvalb-IRES-Cre	MET
718049075	77.34374701976776	0.005174172308431	-82.21624416775174	0.087353877723217	26.50000190734864	1.5685230225782052	0.00036	Pvalb-IRES-Cre	MET
571379507	105.000153184	0.0081242082434	-65.3006820679	0.0302849318832	30.3437538147	1.47667551901	0.000436	Pvalb-IRES-Cre	ME
829198133	225.9687781333924	0.0126543689188265	-68.52514357793899	0.2318765372037887	31.05000114440918	2.7068726108116024	0.0005399999999999	Vip-IRES-Cre	MET
778170169	276.9375145435333	0.0223998965167273	-60.86039352416992	0.014035589993	21.30624961853028	1.9682228197759395	0.00064	Sst-IRES-Cre	MET
756436794	196.87499105930328	0.0228680365421131	-52.2141809463501	0.0311956368386745	47.00000381469727	2.0319090569007754	0.00056	Sst-IRES-Cre	MET
720678722	167.34367609024048	0.0117395852975767	-80.05899217393663	0.1343883574008941	30.30624961853028	1.881931895742018	0.0004559999999999	Sst-IRES-Cre	MET
697806661	71.09378278255463	0.0057546862081618	-76.52253913879395	0.0890870466828346	19.59895896911621	1.367455978889268	0.0002799999999999	Pvalb-IRES-Cre	MET
692809544	152.8124958276749	0.0074177265823203	-62.88442908393012	0.0487194322049617	-6.9375	1.8961899615486304	0.0005100000000001	Pvalb-IRES-Cre	MET
795758408	206.21882379055023	0.022691111144971	-64.53368238969283	0.0458830408751964	23.63749885559082	1.90441729997619	0.0007	Sst-IRES-Cre	MET
726339406	224.06241297721863	0.0191311306514368	-60.3182876586914	0.1541175544261932	38.268751525878905	1.7140624791714454	0.000724	Sst-IRES-Cre	MET
488501071	71.8751177192	0.00514857636768	-80.8073348999	0.0232932921499	26.6749992371	1.31625882422	0.000296	Pvalb-IRES-Cre	ME
573976402	114.553682506	0.00822550077548	-70.0211029053	0.0757312402129	21.1687507629	1.43502158216	0.000316	Pvalb-IRES-Cre	ME
705875798	170.00000178813934	0.0159441664285098	-70.36497370402019	0.2212812006473541	29.546875	1.9310341572064715	0.0004399999999999	Sst-IRES-Cre	MET
839118679	270.9190547466278	0.0256783632426265	-69.60750783284506	0.0519654043018817	15.00624942779541	2.1617202899510057	0.00068	Sst-IRES-Cre	MET
320466776	103.080354631	0.00477003790139	-68.0096206665	0.127682700753	30.0187492371	1.5878005789	0.000356	Pvalb-IRES-Cre	ME
736800603	236.71874403953552	0.0097757866880329	-86.58359336853027	0.0288988798856735	30.50833320617676	3.705342763225428	0.0006666666666666	Vip-IRES-Cre	MET
823603037	162.71880269050598	0.0089620172673434	-59.10936216874556	0.0138549767434597	36.5625	1.646461041813598	0.0004199999999999	Pvalb-IRES-Cre	MET
759967586	296.09373211860657	0.0247397273447106	-65.22413349151611	0.0765500515699386	-0.0374999828636646	1.726499551388745	0.0004733333333333	Sst-IRES-Cre	MET
737488739	195.6249177455902	0.011960967368562	-70.89742431640624	0.0575933866202831	44.04999923706055	3.0544157120424127	0.00056	Vip-IRES-Cre	MET
668176228	164.21858966350555	0.0171861353942331	-69.74325688680013	0.1621505171060562	39.85714340209961	1.512564621646252	0.0004914285714286	Sst-IRES-Cre	MET
328535908	468.415170908	0.0503546470264	-67.4194869995	0.0411055423319	34.625	1.95877312045	0.000435	Sst-IRES-Cre	ME
808841065	502.2028088569641	0.0383215311197733	-70.37925136790557	0.1408703029155731	36.009376525878906	2.674133362885361	0.0006399999999999	Sst-IRES-Cre	MET
562540395	161.09366715	0.0117983809567	-73.3191070557	0.0892508774996	28.203125	2.97371069623	0.00057	Vip-IRES-Cre	ME
720695149	248.59367311000824	0.0210752489714029	-64.7017110188802	0.0283105392009019	26.518749237060547	2.414591648940364	0.0004839999999999	Sst-IRES-Cre	MET
482692974	194.531217217	0.0127403788172	-75.5996322632	0.0566213354468	30.1937503815	1.78009113835	0.000399	Sst-IRES-Cre	ME
680816498	209.8438590765	0.0213545101730291	-72.59390767415364	0.1139859110116958	28.03125	2.065867948230833	0.0004199999999998	Sst-IRES-Cre	MET
761409397	66.09401106834412	0.0052417117005802	-79.49911159939236	0.0183878596872091	17.256250381469727	1.7847946846711626	0.0004199999999999	Pvalb-IRES-Cre	MET
819777399	284.8798632621765	0.0439617517612145	-45.13078085581461	0.0274930037558078	41.51375198364258	1.6807132568131826	0.0006879999999999	Sst-IRES-Cre	MET
761835389	47.03120887279511	0.0080550750712887	-69.48190515691584	0.0100266886875033	1.159027934074402	1.6823866346967629	0.0003911111111111	Pvalb-IRES-Cre	MET
760811392	200.3125995397568	0.0131565386327609	-72.41336345672607	0.0120485089719295	25.027082443237305	2.069898436349185	0.0005066666666666	Sst-IRES-Cre	MET
761753472	268.12514662742615	0.0145429195013303	-76.43341903686523	0.037925150245428	19.16250228881836	3.3438187834157755	0.00078	Vip-IRES-Cre	MET
838479746	149.87488090991974	0.0127614459571281	-67.17509307861329	0.0137475319206714	31.72916984558105	1.8659608660118896	0.0005066666666666	Sst-IRES-Cre	MET
515305346	114.374995232	0.00731328387252	-77.639793396	0.0562333464622	20.375	1.46476694316	0.000315	Pvalb-IRES-Cre	ME
718237581	98.12507033348083	0.0067633944469254	-65.63651195325349	0.0049276668578386	22.4765625	1.4107030188278278	0.0003699999999999	Pvalb-IRES-Cre	MET
750464909	251.0794997215271	0.0261989922401285	-72.22069778442383	0.053928468376398	17.793750762939453	2.054587582400348	0.000596	Sst-IRES-Cre	MET
716107666	217.34367311000824	0.0129420387030671	-69.76973841740535	0.0597745738923549	49.48750305175781	3.6798650069669976	0.000632	Vip-IRES-Cre	MET
703270805	176.17186903953552	0.0266608983295887	-65.36183411734444	0.0622338131070137	28.9375	1.7616197028136673	0.0006177777777777	Sst-IRES-Cre	MET
760491928	256.7188143730164	0.0161937205743165	-71.27641974555121	0.1018784046173095	27.88125228881836	3.2268562642872727	0.0006599999999999	Vip-IRES-Cre	MET
812969884	163.93756866455078	0.0125616167871815	-65.94067153930663	0.026334349066019	13.578750610351562	2.333962880526676	0.0007439999999999	Vip-IRES-Cre	MET
623415197	104.68752682209016	0.005331820716949	-72.10509532206767	0.0772746577858924	0.2109375298023224	1.8731215545480904	0.0006	Sst-IRES-Cre	MET
714420127	137.34377920627594	0.009381992117282	-62.23590621948242	0.183622270822525	26.817710876464844	2.553304005596789	0.0004966666666665	Vip-IRES-Cre	MET
591622050	228.75007987	0.0152421681876	-69.1545791626	0.0328063592315	38.9791679382	2.87532331263	0.000673333333333	Vip-IRES-Cre	ME
653832102	296.5624928474426	0.0150921172741751	-58.09422159194946	0.0266517587006092	31.68750190734864	3.593034943615748	0.0009000000000001	Vip-IRES-Cre	MET
714977195	173.9063560962677	0.0120034825042769	-70.042578125	0.2408633828163147	38.390625	3.15231856170258	0.0004999999999999	Vip-IRES-Cre	MET
666218416	77.81253755092621	0.0042591745708559	-73.04424176897321	0.0240279622375965	13.619791984558104	1.7882736781913022	0.0004233333333332	Pvalb-IRES-Cre	MET
328093618	216.406241059	0.0232759929117	-64.6214904785	0.0282236840576	28.1875	1.77552384016	0.000474	Sst-IRES-Cre	ME
738873268	171.56217992305756	0.0086685124586264	-75.93243577745226	0.1469613462686538	37.57500457763672	2.434453628573469	0.0004399999999999	Vip-IRES-Cre	MET
830959542	226.06238722801208	0.0104917460925645	-78.01346412071815	0.0133567955344915	28.235157012939453	2.9886999591734287	0.00069	Vip-IRES-Cre	MET
320466871	74.21875	0.00800454527651	-69.6425094604	0.0696823075414	17.53125	1.25105172871	0.00026375	Pvalb-IRES-Cre	ME
648310712	278.2813608646393	0.0149037843251907	-59.89982986450195	0.1125767901539802	14.71875	3.2044553538785245	0.0006599999999999	Vip-IRES-Cre	MET
569749430	128.906175494	0.0106752344065	-72.998046875	0.0296688452363	19.96875	1.49467062291	0.00034	Pvalb-IRES-Cre	ME
685682618	68.43745708465576	0.0062813004208056	-63.57155952453613	0.0024786135181784	29.37500190734864	1.4791152872201043	0.0002999999999999	Sst-IRES-Cre	MET
574992320	83.1696391106	0.00631117898307	-77.0028686523	0.0180475711823	26.6640625	1.48900265897	0.000405	Pvalb-IRES-Cre	ME
807563201	205.4275274276733	0.0254514553991823	-71.50902284894671	0.0248838849365711	38.681251525878906	2.17906454660279	0.0005199999999999	Sst-IRES-Cre	MET
692793282	231.24998807907104	0.0110795034203449	-66.5391222635905	0.1496104747056961	17.0	2.3303640328717137	0.00042	Vip-IRES-Cre	MET
740110275	245.7813173532486	0.0161364040784562	-74.55989265441895	0.0793540552258491	28.98593711853028	2.0833513259207006	0.0005549999999999	Sst-IRES-Cre	MET
639004612	235.54687201976776	0.0151613189376814	-76.130934715271	0.0437816120684146	28.02604484558105	3.262663529918345	0.0006099999999999	Vip-IRES-Cre	MET
740134859	174.68775808811188	0.0130997045314804	-75.14695167541504	0.031775489449501	34.83125305175781	1.7270499779405422	0.0005199999999999	Sst-IRES-Cre	MET
812945358	231.2618792057037	0.0161330701341575	-69.14992141723633	0.1068135201930999	33.80000305175781	2.5511627903345886	0.00056	Vip-IRES-Cre	MET
704434137	132.1873813867569	0.0095887762690501	-75.03065745035808	0.0251024141907691	17.34375	1.7627087327215905	0.0005600000000001	Sst-IRES-Cre	MET
753733598	146.4061737060547	0.010766837427201	-73.62218475341797	0.0143009377643466	5.218750476837158	1.761259088522488	0.00046	Sst-IRES-Cre	MET
772132831	213.46870064735413	0.0196318752055223	-67.12438507080078	0.162502571940422	25.28125	2.0998744772058937	0.0006	Sst-IRES-Cre	MET
637358051	505.989670753479	0.025698422367734	-46.107842580131866	0.1159902438521385	12.932291746139526	2.977964834351514	0.0008899999999999	Vip-IRES-Cre	MET
839118825	338.18739652633667	0.0320649766152818	-66.08798772638494	0.023868465796113	38.24687576293945	2.449997779174502	0.00056	Sst-IRES-Cre	MET
736800747	268.12493801116943	0.0151090764516727	-68.17611000754617	0.0674897730350494	47.71667098999024	3.198215329805201	0.0007133333333333	Vip-IRES-Cre	MET
666030065	71.87499850988388	0.0058620249257039	-71.45085313585069	0.0629999637603759	31.9296875	1.2551187756459528	0.0003149999999999	Pvalb-IRES-Cre	MET
817999859	190.9375041723252	0.0099136460035187	-60.40180155436198	0.0360751524567604	22.4325008392334	1.5816967785604517	0.000496	Pvalb-IRES-Cre	MET
727068669	369.06248331069946	0.0149742452679761	-72.32321243286133	0.1519593596458435	25.34375	1.8096971725973696	0.0005899999999998	Sst-IRES-Cre	MET
807596029	247.81234562397003	0.0286168846095553	-76.52017350630327	0.0277627762407064	28.56875228881836	2.0333000248750803	0.00056	Sst-IRES-Cre	MET
694734857	169.53136026859283	0.0109656918061866	-75.56199059119591	0.228209987282753	32.53125	2.5794858855834533	0.0004166666666667	Vip-IRES-Cre	MET
728821776	263.1249129772186	0.0188534859854614	-47.00388908386231	0.0847485437989234	33.025001525878906	1.7322772828581845	0.0004999999999999	Sst-IRES-Cre	MET
570896413	345.156371593	0.0219569292727	-71.615447998	0.33666536212	28.8750019073	3.04862860289	0.00059	Vip-IRES-Cre	ME
666046495	63.90613317489624	0.0073105419676768	-63.64023208618164	0.0101198870688676	41.34375	1.5036160716119555	0.0003199999999999	Pvalb-IRES-Cre	MET
714936352	217.96874701976776	0.0205625073650922	-65.63033918900923	0.0213009044528007	31.505210876464844	3.131086691892801	0.0005933333333333	Vip-IRES-Cre	MET
728756256	228.12499105930328	0.0168152683361918	-63.05098204179244	0.2662621736526489	38.55208206176758	2.037526043576373	0.0005399999999999	Sst-IRES-Cre	MET
718114850	118.28113347291946	0.0090722232023136	-73.97230391068892	0.0276860892772674	9.468750953674316	1.725019394505733	0.0005319999999999	Sst-IRES-Cre	MET
751349800	250.62501430511475	0.0213051436874401	-66.40914090474446	0.047766875475645	31.731250762939453	1.8384106633935315	0.0005199999999999	Sst-IRES-Cre	MET
648597549	67.18753278255463	0.0059344810418291	-84.86394718715123	0.0302002765238285	14.8984375	1.790091577132932	0.0004074999999999	Pvalb-IRES-Cre	MET
754872367	148.12526106834412	0.0182164104853197	-68.71034240722656	-0.0401037447154521	39.41875457763672	1.95270289599142	0.00046	Sst-IRES-Cre	MET
689705007	103.7500947713852	0.0073942414401529	-59.95571341881385	0.0373667031526565	25.0	1.2800922645347574	0.00032	Pvalb-IRES-Cre	MET
728477746	149.21875298023224	0.0151399440962443	-71.18431701660157	0.1075537577271461	36.19374847412109	2.299383695509072	0.000512	Sst-IRES-Cre	MET
808464438	91.56249463558196	0.0073613853703319	-74.51893130215731	0.0191548969596624	1.1437500715255735	1.9037738584187087	0.0006199999999999	Pvalb-IRES-Cre	MET
718475318	127.34393775463104	0.0083115274127868	-73.89710903167725	0.0715454071760177	24.0	1.5450624593924354	0.00046	Sst-IRES-Cre	MET
821882938	122.12508916854858	0.0069931167150728	-76.15039478648792	0.0144415283575654	28.731250762939453	1.4519237949412849	0.0003999999999999	Pvalb-IRES-Cre	MET
570896453	176.874995232	0.00923414994103	-77.2919082642	0.0190985053778	37.4937515259	2.69996883963	0.000608	Vip-IRES-Cre	ME
728756295	189.84355032444	0.0172275788423012	-68.60964107513428	0.0733324438333511	32.040626525878906	1.8112696264588743	0.0004299999999999	Sst-IRES-Cre	MET
710889545	146.87491953372955	0.0117660125174899	-80.3168840910259	0.0630205273628234	-22.046875	1.845404433531936	0.00048	Sst-IRES-Cre	MET
809037900	247.1875548362732	0.0194296065617148	-76.10170582362584	0.026993928477168	32.376564025878906	1.9145780357145887	0.0005649999999999	Sst-IRES-Cre	MET
832499797	163.4005457162857	0.0116228165331718	-70.9519271850586	0.0275057163089513	22.371875762939453	1.751179486322454	0.00049	Pvalb-IRES-Cre	MET
478793814	67.1876892447	0.00696841236676	-78.4479141235	0.0677195191383	24.1625003815	1.60945155336	0.00036	Pvalb-IRES-Cre	ME
807563351	153.0311107635498	0.0094063204918968	-72.16284713745117	0.0311648715287446	40.16875076293945	3.235648530243905	0.0006599999999999	Vip-IRES-Cre	MET
809070689	35.41373834013939	0.0058095219302501	-74.72186364067926	0.1676875799894333	32.84375	1.2838798681037356	0.0002999999999999	Pvalb-IRES-Cre	MET
799944803	401.2187421321869	0.0343931464595988	-55.096867994828656	0.0306033641099929	21.904687881469727	2.063614976191703	0.0006549999999999	Sst-IRES-Cre	MET
806842472	141.87507331371307	0.0089771313058802	-71.54775110880534	0.1641315668821334	33.51250457763672	1.3018213202745887	0.0002999999999999	Pvalb-IRES-Cre	MET
769765483	363.5313808917999	0.0355311225839262	-60.41791756947836	0.0380405373871326	20.63749885559082	2.3345822233543143	0.0006999999999999	Sst-IRES-Cre	MET
683929708	78.43749970197678	0.0061824966232202	-65.00615921020508	0.0105761187151074	30.21875190734864	1.5219538953608265	0.0002999999999999	Pvalb-IRES-Cre	MET
821907565	130.74985146522522	0.0082844532733577	-63.418941497802734	0.0349867492914199	29.93750190734864	1.5160755302222808	0.00036	Pvalb-IRES-Cre	MET
740094065	333.906352519989	0.0213280878298755	-72.52050113677979	0.0887722223997116	26.60000228881836	1.859473346400032	0.0004799999999999	Sst-IRES-Cre	MET
808882292	182.1322739124298	0.0173296139105197	-67.97647285461426	0.187750905752182	32.109375	2.1068254276847	0.0005899999999999	Sst-IRES-Cre	MET
740135032	338.2810354232788	0.0295045956916183	-68.15860070122613	0.1620319187641143	23.61666679382324	1.875351590818372	0.0005	Sst-IRES-Cre	MET
807596161	188.65814805030823	0.0197496420743816	-64.19869474931197	0.0463363900780677	26.59375095367432	2.27488299413588	0.00052	Sst-IRES-Cre	MET
667472005	153.59382331371307	0.0144327254664648	-73.79512176513671	0.0768540576100349	5.296875	1.740688691920172	0.0007599999999999	Sst-IRES-Cre	MET
694898822	196.8750357627869	0.0103686685591502	-61.45388679504394	0.054527711123228	25.84375190734864	3.4615760598441843	0.00077	Vip-IRES-Cre	MET
845484173	150.6875902414322	0.0112938698436854	-75.20859909057617	0.117889679968357	32.724998474121094	1.241002883941417	0.0002799999999999	Vip-IRES-Cre	MET
845631631	131.06246292591095	0.0090871092714999	-64.86245880126953	0.0063375597819685	30.78750228881836	1.3837800603011192	0.0003199999999999	Pvalb-IRES-Cre	MET
780005520	366.8125569820404	0.0416785166515808	-69.55978976978975	0.0066915634088218	31.35624885559082	2.3609364826374666	0.00058	Sst-IRES-Cre	MET
750162069	280.1563143730164	0.0198629628234322	-68.55513555353338	0.0983395054936409	23.97500228881836	1.4647911362368538	0.00042	Sst-IRES-Cre	MET
758263959	189.53150510787964	0.0106004716001318	-70.01747483473558	0.048755619674921	47.103126525878906	2.6276001138371385	0.000385	Vip-IRES-Cre	MET
639013022	177.86458134651184	0.00948103875157	-74.55273222923279	0.0475755110383033	52.04166793823242	3.502469322248273	0.0004999999999999	Vip-IRES-Cre	MET
753733790	159.37499701976776	0.0126498747275017	-64.09106996324327	0.0491580069065094	26.81875228881836	1.7102605325292994	0.0004399999999999	Sst-IRES-Cre	MET
717656224	159.06254947185516	0.0119713350227752	-50.253910758278586	0.0778497979044914	25.856250762939453	1.6676363191581924	0.00046	Pvalb-IRES-Cre	MET
714379428	261.87488436698914	0.0200836514240831	-70.37294692993164	0.2138067185878753	20.49652862548828	3.1345674183055703	0.0006177777777777	Vip-IRES-Cre	MET
766628006	327.0313143730164	0.0507348015447447	-57.80003773082387	0.025787865743041	32.52000141143799	2.8024156292044937	0.0007319999999999	Sst-IRES-Cre	MET
720548007	137.9687488079071	0.0160996182812187	-74.32932815551757	0.1752112656831741	26.28125	1.896775269541349	0.000472	Sst-IRES-Cre	MET
769765549	76.87501609325409	0.0059800231083978	-60.0055165608724	0.011108623817563	40.921875	1.762429288063149	0.000395	Pvalb-IRES-Cre	MET
845516973	85.3123813867569	0.0047492362830774	-71.29673461914062	0.1029866784811019	40.5	1.3817618929058806	0.0002799999999999	Vip-IRES-Cre	MET
656863406	227.34370827674863	0.0144692138235922	-70.0868896484375	0.2394124269485473	33.33125228881836	2.292758854905566	0.0004	Vip-IRES-Cre	MET
718188717	88.12514692544937	0.0063973055301988	-75.11632831280048	0.0246139876544475	16.416666984558105	1.467027111701641	0.0003766666666666	Sst-IRES-Cre	MET
744476851	130.25560975074768	0.0086332557930001	-62.97556266784668	0.1332572400569915	7.143749713897705	1.6652690750663282	0.00046	Pvalb-IRES-Cre	MET
750465208	232.50025510787964	0.0213108509027976	-69.20818328857422	0.017153725028038	25.125	2.095355748727161	0.00052	Sst-IRES-Cre	MET
478949560	178.593754768	0.0104309836265	-71.8590927124	0.0985553190112	17.5125007629	1.45421681115	0.000408	Pvalb-IRES-Cre	ME
685707450	138.59374821186066	0.0172680878899858	-74.16131057739258	0.1495412439107895	30.328125	2.127494886556401	0.0004799999999999	Sst-IRES-Cre	MET
750776506	202.6563584804535	0.0127950492516234	-67.22058020697699	0.0895111486315727	22.131250381469727	1.6155087130249268	0.0003999999999999	Sst-IRES-Cre	MET
760033470	158.43753516674042	0.0071773975144884	-91.42837796892438	0.0164055228233337	6.90625	2.2077491231215944	0.00067	Sst-IRES-Cre	MET
647811265	92.81261265277864	0.0153864498905778	-67.0306761605399	0.1163039952516555	31.98125114440918	1.813197472756412	0.0004999999999999	Sst-IRES-Cre	MET
753782979	254.5309066772461	0.0182562494013908	-71.77288627624512	0.0596124306321144	20.212501525878903	1.7356871928540198	0.0007	Sst-IRES-Cre	MET
787280073	72.71888852119446	0.0057191361845076	-74.30223999023437	0.0175789445638656	22.137500762939453	1.6833955236849016	0.00036	Pvalb-IRES-Cre	MET
658403531	101.09374672174454	0.0081377427767832	-67.84222717285157	0.0117564583197236	32.906253814697266	1.5018888253890654	0.00034	Pvalb-IRES-Cre	MET
744435916	114.68753218650818	0.0077504786667166	-73.88047705756293	0.0280902422964572	23.962501525878903	1.4551484522173683	0.00036	Pvalb-IRES-Cre	MET
757575885	232.81249403953552	0.01756411210016	-64.12738275527954	0.0385030172765255	39.58124923706055	4.105618487867307	0.0007466666666666	Vip-IRES-Cre	MET
745083091	77.81238108873367	0.0056731419886403	-77.15075556437175	0.0660823956131935	28.775001525878903	1.5201379610825576	0.0003599999999999	Pvalb-IRES-Cre	MET
750465238	302.67035961151123	0.0376491363541971	-62.42800733778212	0.1127307638525962	31.28020668029785	2.041316161240739	0.00066	Sst-IRES-Cre	MET
718647510	246.87503278255463	0.0209300088398542	-73.34158401489258	0.1056236550211906	27.08125305175781	2.244851210463934	0.0005960000000001	Sst-IRES-Cre	MET
464212183	223.437577486	0.0154145842052	-65.7717132568	0.196279138327	16.0	1.82117838781	0.0007125	Sst-IRES-Cre	ME
535728342	249.821424484	0.00902249953266	-74.2693939209	0.121393315494	32.59375	2.9277662895	0.000648	Vip-IRES-Cre	ME
892424416	106.28128051757812	0.0092021818153815	-64.79378967285156	0.038577165454626	36.12291717529297	1.2639080049048328	0.0003	Pvalb-IRES-Cre	MET
750776546	274.53115582466125	0.0252027542162027	-74.66502210828993	0.1937506049871444	27.46875190734864	1.9783552755099787	0.0005999999999999	Sst-IRES-Cre	MET
844116194	259.687602519989	0.0163037457176181	-69.9458987896259	0.1837874203920364	29.77083396911621	2.872212219643668	0.0005	Vip-IRES-Cre	MET
705245410	142.5001174211502	0.0106857553278163	-69.71468183729384	0.0504917204380035	14.973958810170492	1.881040445339603	0.0004833333333333	Sst-IRES-Cre	MET
475517157	188.749924302	0.0150856730742	-76.1265029907	0.0210860185325	28.0208358765	1.50889352275	0.000333333333333	Sst-IRES-Cre	ME
752038120	247.1875995397568	0.0309306840254496	-62.13996744155884	0.007044228259474	21.13906478881836	2.8266431596353097	0.0008449999999999	Sst-IRES-Cre	MET
647811305	174.21874403953552	0.0239419973912485	-68.61875915527344	0.1385617703199386	25.687501089913503	1.802690160081091	0.0004942857142857	Sst-IRES-Cre	MET
823242988	112.53120005130768	0.009387770932401	-73.11392084757487	0.0199523698538541	25.756250381469727	1.4719642836305984	0.00038	Pvalb-IRES-Cre	MET
321016044	97.3437875509	0.00673086593047	-76.27368927	0.0529963411391	9.890625	1.42416409159	0.0003	Pvalb-IRES-Cre	ME
488501487	168.124958873	0.00707600025324	-60.3886947632	0.0399486497045	28.875	1.19060921082	0.000306	Pvalb-IRES-Cre	ME
682135792	377.65634059906006	0.027935609253011	-69.18037499321832	0.0504518039524555	28.09375190734864	3.0747636973818016	0.00058	Vip-IRES-Cre	MET
756109552	98.43730181455612	0.0056478460331295	-72.06043412950304	0.0418387651443481	31.11250114440918	1.3155243687737257	0.0002599999999999	Pvalb-IRES-Cre	MET
575910132	148.958325386	0.00716453985097	-71.2949371338	0.0224792789668	39.9553565979	3.07033938825	0.000628571428571	Vip-IRES-Cre	ME
702124277	162.18750178813934	0.0119268591192568	-87.6643460591634	0.2227515131235122	18.72321510314941	1.4655278418448874	0.0003457142857142	Sst-IRES-Cre	MET
561934585	162.343710661	0.0204570543678	-67.3401947021	0.055655926466	35.875	2.8740254997	0.000662857142857	Vip-IRES-Cre	ME
741183749	239.3750995397568	0.0270284371382197	-64.6642837524414	0.0337231270968914	18.46249961853028	1.963935626468212	0.00052	Sst-IRES-Cre	MET
707162377	184.0624958276749	0.0190059805951835	-75.34607488458806	0.06208236515522	22.84375	2.10371436354281	0.0005425	Sst-IRES-Cre	MET
808489236	231.6562533378601	0.0235648550356505	-63.95518233559349	0.1096438691020011	36.87500381469727	2.365063121719415	0.00068	Sst-IRES-Cre	MET
657830169	321.25014066696167	0.0261754618756826	-64.99189910888671	0.0539690181612968	27.5539779663086	2.090531124788233	0.0005	Sst-IRES-Cre	MET
753979676	119.68745291233064	0.0131512422145081	-70.16125573052301	0.0091670285910367	17.45625114440918	2.051701745520221	0.00058	Sst-IRES-Cre	MET
818606366	205.85329830646515	0.0219058759277849	-63.16248911077326	0.1011246740818023	44.63750076293945	2.299224844746991	0.0006399999999999	Sst-IRES-Cre	MET
766628128	162.03154623508453	0.0174038917642737	-76.05053997039795	0.0719403773546218	16.353126525878906	1.751478596103428	0.0004899999999999	Sst-IRES-Cre	MET
728576288	160.78120470046997	0.011600391328462	-85.25938701629639	0.1401302069425583	6.208333492279053	1.66531761347645	0.0004133333333333	Sst-IRES-Cre	MET
825332009	111.65622621774672	0.0095302525847317	-59.52435926957564	0.0148984640836715	36.625	1.5162394698401578	0.0003999999999999	Pvalb-IRES-Cre	MET
571715883	118.035778403	0.0088264218026	-70.1887817383	0.0687168389559	26.171875	1.65820072342	0.00037	Pvalb-IRES-Cre	ME
730796336	239.8437112569809	0.0147614137081138	-68.1962059020996	0.0567947141826152	34.76041793823242	3.5427377866061165	0.0006199999999999	Vip-IRES-Cre	MET
668242224	421.56264185905457	0.0388674621748226	-50.40732955932617	0.0542546324431896	37.89583206176758	2.4551025326452915	0.00058	Sst-IRES-Cre	MET
571314481	137.968823314	0.00607824410787	-77.9546508789	0.0360644459724	16.8250007629	1.63640890923	0.0004	Pvalb-IRES-Cre	ME
692539701	282.81253576278687	0.0285628934816508	-69.63528527153863	0.2070507854223251	27.59375	1.790932114694348	0.00048	Sst-IRES-Cre	MET
714953014	260.1563334465027	0.0267747781202693	-62.5106201171875	0.0220854114741086	23.243751525878903	3.686131630265139	0.0009999999999999	Vip-IRES-Cre	MET
322515253	188.169494271	0.0129525315648	-72.6786804199	0.0492373257875	11.765625	1.64448868012	0.0004375	Sst-IRES-Cre	ME
534303031	484.374970198	0.0284841869523	-70.6985549927	0.0187643636018	18.8812503815	2.05241293343	0.000564	Sst-IRES-Cre	ME
804974905	206.14901185035703	0.0607363073270778	-68.13819758097331	0.0085117034614086	26.39583396911621	2.300480314175521	0.0005399999999999	Sst-IRES-Cre	MET
809668930	137.59368658065796	0.0095926836899809	-61.153591791788735	0.0461847819387912	36.14374923706055	1.4013948510778238	0.00032	Pvalb-IRES-Cre	MET
639390023	206.51035010814667	0.0092221243275929	-80.36599941911369	0.0252517294138669	36.59375	3.320662442894269	0.000656	Vip-IRES-Cre	MET
754487624	115.78120291233064	0.0110521682853197	-58.056814633882965	0.0292538572102785	20.0636043548584	1.4655732957166463	0.0004647058823529	Sst-IRES-Cre	MET
772698443	108.50001871585846	0.0136863524806141	-61.98876304626465	0.0097424145787954	29.75	1.6873857794855962	0.0003999999999999	Sst-IRES-Cre	MET
665104716	253.12498211860657	0.0201659800039124	-59.9657223041241	0.2539287507534027	50.15056991577149	1.9776412399345729	0.0005436363636363	Sst-IRES-Cre	MET
650129743	121.56257033348083	0.0104643014867938	-68.14571615365836	0.0051655429415404	21.862499237060547	1.461171206461973	0.0004239999999998	Pvalb-IRES-Cre	MET
469610831	118.281245232	0.0105856175014	-77.9198150635	0.0246023330837	20.9750003815	1.67347355818	0.00043	Pvalb-IRES-Cre	ME
758206804	119.99969184398653	0.0072121669905487	-71.23767013549805	0.0286190025508403	31.76249885559082	1.1676281044424917	0.00028	Pvalb-IRES-Cre	MET
772567385	95.31234204769136	0.0077499799648047	-83.22503731467508	0.0094518568366765	9.29062557220459	1.689299235912854	0.00039	Pvalb-IRES-Cre	MET
689664347	311.56259775161743	0.0251851292759138	-68.5776850382487	0.123087577521801	25.55208396911621	2.22222407558843	0.0005733333333332	Sst-IRES-Cre	MET
745083231	130.4689347743988	0.0067316639042012	-63.2710223197937	0.0366494096815586	28.50000190734864	1.2323504151486224	0.00026	Pvalb-IRES-Cre	MET
818811232	97.03125059604643	0.0077069180280821	-69.59012374877929	0.0485405921936035	28.80000114440918	1.3899810575491711	0.00036	Pvalb-IRES-Cre	MET
639398242	216.1459177732468	0.0118965033079648	-73.47391232577237	0.0796254202723503	30.6015625	3.035611432444825	0.00067	Vip-IRES-Cre	MET
685707621	110.31241714954376	0.0081700215387886	-82.15408833821614	0.0407420136034488	17.875	1.8172328021558928	0.00042	Sst-IRES-Cre	MET
761475429	90.62499552965164	0.0073308470840951	-70.02740001678467	0.0800762549042701	28.140625	1.3754323934303452	0.0003799999999999	Pvalb-IRES-Cre	MET
328954223	331.09369874	0.023164523926	-76.3174057007	0.0071730511263	26.3687496185	2.11402196958	0.0005	Sst-IRES-Cre	ME
576336240	280.781298876	0.0111434008194	-72.2947235107	0.0917779430747	47.5750007629	2.85379554356	0.00044	Vip-IRES-Cre	ME
844919153	194.9686706066132	0.0133607053608472	-70.15964813232422	0.0184684004634618	48.50625228881836	3.406586812226395	0.0007599999999999	Vip-IRES-Cre	MET
803582322	108.62506926059724	0.0073733133186271	-63.49754090742631	0.0243499018251895	32.36874771118164	1.5208129696223582	0.00034	Pvalb-IRES-Cre	MET
713806196	201.40624046325684	0.0102641843810589	-66.63425306840377	0.0420878678560256	40.875	3.6800288975205167	0.0007633333333333	Vip-IRES-Cre	MET
778162561	210.05520224571228	0.0173916028369364	-83.89894658868963	0.1823920607566833	25.043750762939453	2.159038736638585	0.00056	Sst-IRES-Cre	MET
692015490	192.34389066696167	0.0144175530868875	-71.72063387357272	0.0517996251583099	29.08482306344169	1.625829526977324	0.0006171428571428	Sst-IRES-Cre	MET
836612484	150.15628933906555	0.0074847520044389	-64.0582819851962	0.0127555122599005	26.950000762939453	1.731703320160767	0.00046	Pvalb-IRES-Cre	MET
750489990	245.8806931972504	0.0140290328906481	-47.28312555948893	0.0406909398734569	32.51875305175781	2.05471622004108	0.0006999999999999	Sst-IRES-Cre	MET
750670218	128.12499701976776	0.0135652026194486	-73.29833297729492	0.0543108060956001	23.13125228881836	1.9332474357988327	0.00056	Sst-IRES-Cre	MET
807563662	211.90619468688965	0.0210791386839359	-60.43004035949707	0.0896116271615028	39.54375076293945	1.7585570746083805	0.0005399999999999	Sst-IRES-Cre	MET
738709906	199.6873766183853	0.0136910811279155	-74.25331401824951	0.1653553694486618	34.48749923706055	2.8870269767036323	0.00048	Vip-IRES-Cre	MET
685379987	141.8749988079071	0.0153784809329982	-73.46131218804254	0.1083431988954544	17.250001907348633	1.953755557964962	0.0004899999999999	Sst-IRES-Cre	MET
704762259	253.7500560283661	0.0197694149412695	-74.80895317925348	0.0666349381208419	43.40625	2.283175090458943	0.0005399999999999	Sst-IRES-Cre	MET
324522388	460.491210222	0.0277693661544	-72.7053756714	0.07130856812	23.9187507629	1.72326541183	0.000457	Sst-IRES-Cre	ME
764744086	64.99996036291122	0.0054070636941265	-68.64026260375977	0.1162717640399932	26.768749237060547	1.4494886999949783	0.00036	Pvalb-IRES-Cre	MET
484635029	67.3439055681	0.00417659957883	-72.9205703735	0.0821302458644	21.078125	1.33615680264	0.000274166666667	Pvalb-IRES-Cre	ME
704410009	319.68748569488525	0.0276646032043664	-59.979069519042966	0.040456123650074	18.11718940734864	2.2308616116278235	0.0005499999999999	Sst-IRES-Cre	MET
714428827	176.87495052814484	0.0119957889269574	-74.45542483859592	0.1035893335938453	28.081249237060547	2.8755775485150967	0.0004919999999999	Vip-IRES-Cre	MET
706236828	25.78121051192284	0.0058403786314387	-73.37885284423828	0.1157283559441566	28.59375190734864	1.47351795251156	0.0003799999999999	Sst-IRES-Cre	MET
873689501	191.21882319450376	0.0226952392733478	-70.55075302124024	0.0367458015680313	27.28125	2.2111452574070447	0.00056	Sst-IRES-Cre	MET
704500129	162.0311737060547	0.0109180785098892	-62.606968349880646	0.067734494805336	26.96875	2.094857630951072	0.0004333333333333	Sst-IRES-Cre	MET
741110186	198.43730330467224	0.0167054653165432	-70.02887630462646	0.0779591426253318	21.17500114440918	2.0219105898183223	0.00068	Sst-IRES-Cre	MET
819802541	378.6876499652863	0.0307214706767486	-62.73488006591797	0.0618251860141754	25.075000762939453	1.9800387239133537	0.0005999999999999	Sst-IRES-Cre	MET
738783662	311.71855330467224	0.0219348306269897	-62.456749810112846	0.0515676848590374	33.95625305175781	3.871775786604673	0.0007399999999999	Vip-IRES-Cre	MET
659550641	273.75009655952454	0.0201194391910844	-69.72477798461914	0.1999187916517257	7.9375002649095325	1.9167055441133232	0.0007866666666666	Sst-IRES-Cre	MET
839537077	117.0937716960907	0.0087629064707284	-65.49212993275036	0.0165991578251123	32.45000076293945	1.4936041884294615	0.00034	Sst-IRES-Cre	MET
509522358	108.437493443	0.00701892688562	-66.411277771	0.0540364570916	19.015625	1.30231851103	0.00029	Pvalb-IRES-Cre	ME
741175739	237.49980330467224	0.0145737567683263	-70.28598870171442	0.0940454825758934	20.518749237060547	1.617982642843064	0.0004199999999999	Sst-IRES-Cre	MET
759959997	248.43767285346985	0.0242045149786207	-64.48309538099501	0.0533533208072185	25.037500381469727	2.758205475331373	0.0007599999999999	Vip-IRES-Cre	MET
808972734	115.33081531524658	0.0081188392420894	-58.12091096242269	0.0251073148101568	20.64791679382324	1.3091889285338334	0.00034	Pvalb-IRES-Cre	MET
752038334	156.09359741210938	0.0177481106860816	-70.42540836334229	0.0398744493722915	23.83392906188965	1.868581449588964	0.0005314285714285	Sst-IRES-Cre	MET
562524605	236.249998212	0.00876976755735	-74.9475479126	0.0527718253434	44.0625	2.86605743466	0.00058	Vip-IRES-Cre	ME
724775364	170.3124642372131	0.015505216394036	-62.551763746473526	0.0299825370311737	41.09375	2.391268104225708	0.000452	Sst-IRES-Cre	MET
475550148	114.531256258	0.00621089126902	-75.6578292847	0.0726962611079	27.6937522888	1.37203574081	0.000308	Pvalb-IRES-Cre	ME
844845510	200.51676034927368	0.0142439058494934	-60.05760478973389	0.0252727083861827	52.875	3.595832257555278	0.0007599999999999	Vip-IRES-Cre	MET
761000395	285.62483191490173	0.0342410202060658	-63.20956039428711	0.0910735428333282	10.825000762939451	1.8572660023116927	0.0006600000000001	Sst-IRES-Cre	MET
758002124	259.01782512664795	0.0465625043560709	-72.6118729909261	0.0013116081245243	33.10000228881836	1.6675569574335118	0.0006	Sst-IRES-Cre	MET
750440911	245.3126758337021	0.0236021846064903	-75.28059217664931	0.0532002188265323	30.806251525878903	2.5074743638240924	0.00072	Sst-IRES-Cre	MET
718631381	112.187497317791	0.0092038190111779	-70.40543482853816	0.0290723666548728	20.49374961853028	1.4521582218692974	0.0003439999999999	Sst-IRES-Cre	MET
705278421	262.03134655952454	0.0169710943283123	-71.94806162516277	0.0278654899448156	10.604166984558104	2.2665037828640404	0.0006333333333332	Sst-IRES-Cre	MET
626069976	291.27612709999084	0.0278136993771302	-59.92532489174291	0.0661408528685569	13.362500190734863	2.142501832665674	0.000584	Sst-IRES-Cre	MET
700264920	378.9061307907105	0.0170551977050978	-60.35451785000888	0.0760255753993988	37.82500076293945	2.1555849631599235	0.0006959999999999	Sst-IRES-Cre	MET
751317473	191.56263768672943	0.0170244615193455	-65.32123470306396	0.08014377951622	40.30982208251953	2.20480181273295	0.0004628571428571	Sst-IRES-Cre	MET
329224678	183.906212449	0.0137660096974	-77.7048721313	0.0880968868732	34.671875	1.95740857691	0.0004225	Sst-IRES-Cre	ME
728150511	242.50011146068573	0.0210130325999491	-61.912345038519966	0.0692483633756637	44.90625228881836	2.011142347724971	0.0004719999999999	Sst-IRES-Cre	MET
750465525	176.8183708190918	0.0157659526743399	-76.96835399809338	0.0711371079087257	24.096874237060547	2.0207625820002884	0.0004799999999999	Sst-IRES-Cre	MET
667472374	247.96877801418304	0.0155574669135646	-59.84729080200195	0.1027347147464752	8.713541984558105	1.9100460093705256	0.0005066666666666	Sst-IRES-Cre	MET
765891067	100.7031351327896	0.0085623536722638	-67.54347588034237	0.0084942197427153	21.393749237060547	1.3296095963920282	0.0004199999999999	Pvalb-IRES-Cre	MET
687935998	200.15616714954376	0.0144900584911195	-73.83932685852051	0.1525634676218032	24.92500114440918	1.7451495147563123	0.000576	Sst-IRES-Cre	MET
648139266	254.37507033348083	0.0151581917392313	-71.98395919799805	0.0670910477638244	10.229166984558104	2.7558600143463905	0.0008899999999999	Vip-IRES-Cre	MET
650146312	121.40632420778276	0.0089245633167944	-63.26730381358754	0.0431234464049339	12.34375015894572	2.124819783341146	0.0005933333333333	Pvalb-IRES-Cre	MET
761344520	105.78098148107529	0.0071951945482536	-76.3849114312066	0.0104642715305089	4.918749809265137	1.7602440476087582	0.0003999999999999	Pvalb-IRES-Cre	MET
659141131	164.68742489814758	0.0133890448732389	-59.68062438964844	0.0170362703502178	35.28645706176758	3.453839551825776	0.0006166666666666	Vip-IRES-Cre	MET
750440984	264.0624940395355	0.0206766190069511	-62.42298041449653	0.0065588345751166	29.943750381469727	2.575955927569158	0.0007199999999999	Sst-IRES-Cre	MET
733377050	109.97779667377472	0.0070192110318485	-62.34071146647136	0.0599965676665306	29.39999961853028	1.3967740578704764	0.00036	Pvalb-IRES-Cre	MET
786272796	150.0937193632126	0.0123830930231141	-73.5391944885254	0.0150273162871599	29.75625228881836	1.8684394130215	0.0004999999999999	Sst-IRES-Cre	MET
788296224	193.40680539608	0.0238168306671588	-66.89340146382649	0.2384736686944961	40.91250228881836	1.909672849520008	0.00048	Sst-IRES-Cre	MET
718205473	256.718784570694	0.0230762675864796	-63.88182025485568	0.0626536235213279	13.46484375	1.927744855447012	0.0007474999999999	Sst-IRES-Cre	MET
756412962	274.1873562335968	0.0268950939137062	-67.93606440226237	0.0098841302096843	38.78750228881836	2.1056171940587456	0.0006	Sst-IRES-Cre	MET
756109860	98.906509578228	0.0067165440411053	-63.26103295220269	0.041520569473505	28.37500190734864	1.462325117255172	0.00034	Pvalb-IRES-Cre	MET
692777508	104.53113168478012	0.0055719400185439	-76.49309049333844	0.0047072335146367	25.5	1.8010245660061828	0.000448	Pvalb-IRES-Cre	MET
689017383	176.0937124490738	0.0156668770562535	-75.44867840935203	0.1596918404102325	32.114583333333336	2.222281123552142	0.0005133333333332	Sst-IRES-Cre	MET
886993450	164.09865021705627	0.0090394255693477	-71.46505972055289	0.1393214613199234	23.25625228881836	1.4164266787018815	0.0002999999999999	Pvalb-IRES-Cre	MET
769954349	164.53112661838531	0.0166427829518026	-70.21572303771973	0.0308571998029947	24.893749237060547	2.333310184921968	0.00056	Sst-IRES-Cre	MET
837095993	146.3220864534378	0.0100098657635129	-67.21768866644965	0.0625196993350982	38.06562805175781	1.3823666772674632	0.0003299999999999	Pvalb-IRES-Cre	MET
805671482	206.00001513957977	0.0115307202314868	-74.91769638061524	0.0345666669309139	37.93124771118164	3.127376146184694	0.0007199999999999	Vip-IRES-Cre	MET
720622139	275.781124830246	0.031135812076476	-70.70703887939453	0.1478497833013534	31.421878814697266	2.7422306456225947	0.0007299999999998	Sst-IRES-Cre	MET
704541244	98.4376147389412	0.006865077901054	-69.7035961151123	0.0962055325508117	24.06250190734864	1.5809638216776412	0.0003199999999998	Sst-IRES-Cre	MET
648892990	298.750102519989	0.0157270616269592	-65.84563276502821	0.0870744660496711	5.317307949066162	3.265593914703459	0.0007615384615384	Vip-IRES-Cre	MET
759755329	237.34377324581143	0.0132865304170914	-68.94345016479492	0.1647426486015319	28.085418701171875	2.774965048897589	0.00052	Vip-IRES-Cre	MET
872026690	71.3125616312027	0.0071372916523223	-68.88990783691406	0.0176585055887699	29.918750762939453	1.5332655474370067	0.00036	Pvalb-IRES-Cre	MET
702100037	231.0938984155655	0.0147661056041562	-72.78211517333985	0.1609241962432861	17.44444465637207	1.9513962610367648	0.0005888888888888	Sst-IRES-Cre	MET
703992393	230.9376448392868	0.0174200488137669	-61.81189068880949	0.0550360493361949	32.27083206176758	2.227518736144353	0.0005266666666667	Sst-IRES-Cre	MET
716091980	212.8123790025711	0.0104175149119563	-60.15329780578613	0.0696639046072959	36.73437627156576	2.917678785530772	0.0005866666666666	Vip-IRES-Cre	MET
758157901	139.68734443187714	0.010139701412101	-63.10178422927856	0.0981226339936256	29.430212020874023	1.5028396988647377	0.0003566666666666	Pvalb-IRES-Cre	MET
584561230	229.687452316	0.0113322718418	-75.7167434692	0.0268382318318	25.6875	2.54043996493	0.000804	Vip-IRES-Cre	ME
572609108	107.812419534	0.00740093647492	-71.7519073486	0.0352818630636	11.921875	1.43152212564	0.000345	Pvalb-IRES-Cre	ME
720745045	58.28136205673218	0.008713981305272	-69.97646045684814	0.0945707112550735	46.5	1.3698009237648805	0.0003000000000001	Pvalb-IRES-Cre	MET
471077468	131.25038147	0.00825751371174	-66.2035369873	0.0613858103752	12.5078125	1.45100035792	0.00033375	Pvalb-IRES-Cre	ME
758272612	81.40639960765839	0.0083688961184527	-70.25503635406494	0.0454405434429645	21.95625114440918	1.5652501320304602	0.0003799999999999	Pvalb-IRES-Cre	MET
471085676	130.624964833	0.00596358647854	-74.789932251	0.0472249612212	24.75	1.33660834774	0.000303333333333	Pvalb-IRES-Cre	ME
642568816	200.22310316562653	0.0081933664964	-61.77974735606801	0.0783191546797752	49.703125	3.3697578255949128	0.0006099999999999	Vip-IRES-Cre	MET
584495731	220.156207681	0.0137971505461	-72.6567993164	0.0305739697069	53.5875015259	2.5406464025	0.000456	Vip-IRES-Cre	ME
892547707	60.53134799003601	0.0055768439161957	-68.9149995283647	0.0746899619698524	18.356250762939453	1.517329618360029	0.00032	Pvalb-IRES-Cre	MET
759927422	76.71871036291122	0.004582653266458	-43.92165613174439	0.2900811731815338	15.706250190734863	1.803239339034752	0.0005799999999999	Sst-IRES-Cre	MET
710136447	258.5935890674591	0.0123151139001037	-67.57337466153231	0.0728401467204094	44.712501525878906	3.271838863943111	0.00056	Vip-IRES-Cre	MET
761344650	288.906455039978	0.0172451902581549	-67.83035278320312	0.211254745721817	16.75625228881836	3.085342977370188	0.00058	Vip-IRES-Cre	MET
570626702	195.937499404	0.0113872111239	-74.8346633911	0.0506900474429	31.5178565979	2.74900493643	0.000594285714286	Vip-IRES-Cre	ME
772690576	134.31251049041748	0.0069249542298455	-76.26741256713868	0.0337676331400871	32.756248474121094	1.7180595077015393	0.0004799999999999	Sst-IRES-Cre	MET
694874769	261.5624964237213	0.0087916086306833	-76.46518389383952	0.0626851171255111	21.87784004211425	3.528823530428528	0.0006181818181818	Vip-IRES-Cre	MET
574059157	97.8125333786	0.00401192595664	-70.846244812	0.0347663201392	27.859375	1.54780631763	0.00033	Pvalb-IRES-Cre	ME
591278744	84.3751132488	0.00505936767229	-75.4554214478	0.0264509860426	29.4531269073	1.3674017517	0.00033	Pvalb-IRES-Cre	ME
754528922	119.84366923570632	0.0085722879357287	-63.33223485946655	0.0420672930777072	25.70312690734864	1.400234196670583	0.0002799999999999	Pvalb-IRES-Cre	MET
761418394	185.3124499320984	0.0114495760346322	-77.99933815002441	0.0333079360425472	16.98750114440918	4.068467563348859	0.0009	Vip-IRES-Cre	MET
756101789	111.71893775463104	0.0076669561844112	-72.96745452880859	0.0433730669319629	25.731250762939453	1.597775483333081	0.0004099999999999	Pvalb-IRES-Cre	MET
760050336	278.28121185302734	0.022649382326927	-64.29501258002387	0.1172582581639289	33.51250457763672	2.973738380530308	0.0006199999999999	Vip-IRES-Cre	MET
698077857	120.31253427267076	0.00767171134326	-72.26720369779147	0.0079195275902748	28.76041984558105	1.247261993562499	0.0003933333333333	Pvalb-IRES-Cre	MET
770216620	216.8748825788498	0.0220268550338878	-61.1493706703186	0.051089059561491	21.43750190734864	2.112724396767706	0.00058	Sst-IRES-Cre	MET
700420784	237.6560866832733	0.0115527336995105	-68.03942362467448	0.2587955892086029	24.21875190734864	2.18105251498174	0.0004399999999999	Vip-IRES-Cre	MET
647508656	190.93753397464752	0.0289652319330979	-64.3094581604004	0.1614169627428054	39.07291793823242	2.2656703236924804	0.0005733333333332	Sst-IRES-Cre	MET
753963699	107.03105479478836	0.0104144433568601	-72.95560932159424	0.0162268653512001	39.09999847412109	1.989608073178732	0.0004799999999999	Sst-IRES-Cre	MET
623891125	599.2188453674316	0.0369646340475221	-74.80890619187127	0.2666908204555511	-1.328125	2.0064130754186147	0.000845	Sst-IRES-Cre	MET
799929013	277.52476930618286	0.0229511843950881	-61.62631590470024	0.059986300766468	8.08125114440918	2.182784003915635	0.0008599999999999	Sst-IRES-Cre	MET
808547003	159.18275713920593	0.0146975762933592	-62.75798346779563	0.1551034897565841	46.66249847412109	1.7006268953384005	0.0003899999999999	Sst-IRES-Cre	MET
714953409	175.15617609024048	0.009105576483701	-75.5204326923077	0.081610307097435	45.40625381469727	3.3641463706631782	0.0005649999999999	Vip-IRES-Cre	MET
509620929	226.406291127	0.0107717388439	-73.7278747559	0.0353129655123	35.5625	2.82079882626	0.000772	Vip-IRES-Cre	ME
692286150	182.03116953372955	0.012599452721022	-66.2372563680013	0.1228423714637756	42.88750076293945	2.867165085239995	0.0004639999999999	Vip-IRES-Cre	MET
659485385	371.2501525878906	0.0408082373060624	-60.85861689249675	0.0271597132086753	33.234375	1.9640111474234945	0.0008	Sst-IRES-Cre	MET
703271625	291.4062440395355	0.0116254739792362	-60.25927395290799	0.0497981943190097	41.91146087646485	3.646218724457873	0.00078	Vip-IRES-Cre	MET
476754635	321.875035763	0.0245318292123	-60.2379150391	0.222038641572	24.484375	1.53368450952	0.000395	Sst-IRES-Cre	ME
754848460	447.18778133392334	0.02082401391886	-63.150795459747314	0.1187504082918167	18.37916755676269	2.1029711913897606	0.0005933333333333	Sst-IRES-Cre	MET
794825421	275.1372456550598	0.0437904178553758	-59.41707070668539	0.0317966975271701	27.5731258392334	2.3582892386099377	0.0006179999999999	Sst-IRES-Cre	MET
692777680	197.0313936471939	0.0110043653660247	-71.97506159002131	0.1642468720674514	30.64062690734864	2.66121148120735	0.00041	Vip-IRES-Cre	MET
805589713	292.5313413143158	0.0202647540640191	-66.31305858067104	0.0173906162381172	8.14375114440918	2.192162047688784	0.0006	Sst-IRES-Cre	MET
570921682	248.928666115	0.0110465064817	-68.4296646118	0.0617616847157	28.9562530518	2.54726301503	0.000488	Vip-IRES-Cre	ME
751325916	296.8747615814209	0.0226414393857804	-66.53225008646648	0.0104278642684221	4.699999809265137	2.3228590818533723	0.0008599999999999	Sst-IRES-Cre	MET
623989470	222.5261032581329	0.0200480230301931	-74.2928862138228	0.0992543622851371	29.859375	2.2073158232983663	0.0006266666666666	Sst-IRES-Cre	MET
659960546	198.89484345912933	0.0114538922204289	-78.39021809895833	0.0335348434746265	29.28571510314941	1.9592144505105848	0.0005942857142856	Sst-IRES-Cre	MET
760533748	171.24995589256287	0.0206620725369318	-63.99562072753906	0.086405299603939	31.57500267028809	2.1845004337091978	0.0005999999999999	Sst-IRES-Cre	MET
817935092	127.84378230571748	0.0091058689983865	-71.15343348185222	0.1126299798488617	34.43124771118164	1.5939645328517886	0.0003999999999999	Pvalb-IRES-Cre	MET
485061364	100.468829274	0.00579253559824	-70.4083404541	0.0518363006413	20.8000011444	1.35649267711	0.000302	Sst-IRES-Cre	ME
718492407	225.00017285346985	0.0304910972516788	-52.647127628326416	0.0537672080099582	36.10416793823242	2.235233304644463	0.0007266666666666	Sst-IRES-Cre	MET
818655994	324.9374032020569	0.0201148454150929	-60.13396349820224	0.1369437277317047	40.76874923706055	1.8069451174594648	0.00052	Sst-IRES-Cre	MET
670348027	96.87507152557372	0.0053996479014567	-73.37598660117702	0.0233565978705883	20.125	1.5630195056004923	0.00034	Pvalb-IRES-Cre	MET
770249470	181.5622299909592	0.0130910635936884	-59.79158878326416	0.0873451679944992	32.55937576293945	1.6386289739733306	0.00045	Sst-IRES-Cre	MET
679457550	258.1249475479126	0.0143125178979975	-77.1351531982422	0.1670848429203033	15.520834048589071	1.585432733525572	0.0005166666666666	Sst-IRES-Cre	MET
753963792	321.93171977996826	0.0444267746823009	-57.28467445373535	0.0124864503741264	42.46249771118164	2.74133564431016	0.0005999999999999	Sst-IRES-Cre	MET
718123792	204.29685711860657	0.0159853107906755	-63.496497381301154	0.1324743777513504	41.0546875	1.6802496760563554	0.0004699999999999	Sst-IRES-Cre	MET
779776785	168.6249077320099	0.0195811892555162	-77.91551854060246	0.1759958565235138	26.64999961853028	2.3382453841998774	0.00064	Sst-IRES-Cre	MET
718852883	147.0312476158142	0.0199403599253633	-60.12852454185486	0.0091225458309054	30.30208396911621	2.030457429678164	0.00056	Sst-IRES-Cre	MET
754873107	160.93768179416656	0.0145829143277474	-69.48479557037354	0.0714901164174079	33.13749694824219	1.9117065924490395	0.0004299999999999	Sst-IRES-Cre	MET
836457236	155.85458278656006	0.0092443114464518	-68.21913733849159	0.0476796552538871	22.731250762939453	1.671300449810812	0.0004	Pvalb-IRES-Cre	MET
713159452	103.28128188848495	0.0110550627976034	-66.77059819148137	0.098283514380455	22.82812690734864	1.6567012233861935	0.0003799999999999	Sst-IRES-Cre	MET
321704734	137.50000298	0.00741216340115	-76.2554244995	0.0252450555563	5.375	1.65233018833	0.0004	Pvalb-IRES-Cre	ME
807613219	406.38837218284607	0.0221664647404711	-60.430902390252974	0.0600407421588897	34.5625	2.231341186715787	0.0005499999999999	Sst-IRES-Cre	MET
715150120	112.34375089406969	0.0087436552329482	-64.06727256774903	0.090480551123619	59.90625	3.0520260211722583	0.0004599999999999	Vip-IRES-Cre	MET
722891560	91.87503904104231	0.0093657613823597	-69.94688056497013	0.0384867973625659	35.390625	1.5976488403277056	0.00034	Pvalb-IRES-Cre	MET
574067499	68.90617311	0.00676567995409	-71.0417861938	0.00943136960268	26.5187492371	1.28097472854	0.000298	Pvalb-IRES-Cre	ME
770249517	346.903532743454	0.0315044454914205	-61.60862849308894	0.140083447098732	27.140625	1.943079408934808	0.000576	Sst-IRES-Cre	MET
703279918	328.2811939716339	0.0192070985921176	-59.24623489379883	0.0717139691114425	51.31250381469727	3.2797932865367208	0.00055	Vip-IRES-Cre	MET
823857965	150.88243782520294	0.009443671026565	-70.38792383103143	0.0280984509736299	28.34375190734864	1.4508133540947088	0.0004	Pvalb-IRES-Cre	MET
657986352	228.28136384487152	0.0220293995465938	-60.507810072465375	0.2317654490470886	30.39062690734864	2.651773485972736	0.000395	Sst-IRES-Cre	MET
639005493	302.2136390209198	0.0160076280582174	-59.109752246311736	0.0789088979363441	34.3203125	4.082992392197501	0.0006999999999999	Vip-IRES-Cre	MET
475132727	291.406184435	0.0180065429226	-68.7102890015	0.0525948405266	20.125	1.40004273299	0.000348333333333	Sst-IRES-Cre	ME
696128312	215.3124958276749	0.0130591969347872	-74.83883158365886	0.0504352375864982	10.0625	3.237204843641951	0.0006	Vip-IRES-Cre	MET
702051128	185.7810914516449	0.0184979674851929	-72.53841171264648	0.2614225447177887	29.856250762939453	1.886683902076522	0.000524	Sst-IRES-Cre	MET
809694011	93.37497502565384	0.0085809575314014	-70.31323318481445	0.0458092764019966	32.593753814697266	1.5208037687334903	0.00038	Pvalb-IRES-Cre	MET
760329020	449.5313465595245	0.0279567886460478	-56.91901016235352	0.0217050705105066	16.681249618530273	2.4993471338980644	0.00078	Sst-IRES-Cre	MET
808547132	195.59386372566223	0.0193242035322393	-78.07808421208308	0.0677541047334671	46.10625457763672	2.3953510058980063	0.0004999999999999	Sst-IRES-Cre	MET
642569032	229.57591712474823	0.0134802351814035	-69.12985229492188	0.1697543114423751	32.03125	3.111970551475551	0.0005299999999999	Vip-IRES-Cre	MET
739570508	300.3123998641968	0.0157942427052706	-67.06114196777344	0.1974469125270843	25.86041831970215	2.8466578402498364	0.0006066666666666	Vip-IRES-Cre	MET
698504012	78.90636473894119	0.0067031725094325	-71.7372673034668	0.0337600223720073	6.640625	1.5017296021778743	0.00036	Pvalb-IRES-Cre	MET
571396942	124.687433243	0.00654672191692	-75.9312667847	0.0301904976368	18.5	1.49021659295	0.000372	Pvalb-IRES-Cre	ME
703238991	204.2187452316284	0.0194830201443044	-68.17085350884332	0.1344310194253921	39.25	2.187152827192516	0.0004599999999999	Sst-IRES-Cre	MET
705663823	269.06245946884155	0.0239289442441862	-64.17401933670044	0.3174425661563873	32.20624923706055	1.6854691533889905	0.000552	Sst-IRES-Cre	MET
752063316	280.9375524520874	0.0298824052663772	-66.33103603786893	0.134950190782547	6.575000762939453	1.878147800453643	0.0006599999999999	Sst-IRES-Cre	MET
711799638	139.2187774181366	0.0115836828551812	-74.62807040744357	0.010999159887433	29.098960876464844	2.0635473463483724	0.0004666666666666	Sst-IRES-Cre	MET
770249559	248.9059269428253	0.0262655316389776	-69.36623859405518	0.2830559909343719	26.068750381469727	2.06872701171953	0.0004999999999999	Sst-IRES-Cre	MET
707408726	206.09386265277865	0.0191019765056206	-70.73187866210938	0.1142085790634155	16.15625	2.003993536992416	0.000585	Sst-IRES-Cre	MET
763384665	107.03124850988388	0.00765472275334	-72.3073486328125	0.0417423620820045	27.04125022888184	1.4613739614984051	0.000308	Pvalb-IRES-Cre	MET
838538073	143.0625170469284	0.0079595397384041	-69.93538249622692	0.0710436478257179	34.009376525878906	1.518343176780231	0.00034	Sst-IRES-Cre	MET
692310875	189.6875351667404	0.0121436229470877	-78.58664004007976	0.0554839633405208	37.36979293823242	3.2498442232432545	0.0006699999999999	Vip-IRES-Cre	MET
809636700	109.28121209144592	0.0077734673160208	-72.0549750328064	0.0028582867234945	27.45625114440918	1.4252856812809522	0.0003199999999999	Pvalb-IRES-Cre	MET
679899997	124.84359741210938	0.0200263185085497	-66.39370918273926	0.1154236644506454	34.1625	2.03004210598975	0.00046	Sst-IRES-Cre	MET
594047832	303.906291723	0.0213259324543	-60.3024635315	0.0873658806086	22.2062492371	2.79218349468	0.000844	Vip-IRES-Cre	ME
750801763	474.0474820137024	0.0451082058590879	-60.74703306310317	0.0509418919682502	10.31874942779541	1.9507221814765825	0.0006599999999999	Sst-IRES-Cre	MET
569955172	95.0001105666	0.00528376029136	-78.3219833374	0.0253362935036	28.1302108765	1.4475347358	0.00032	Pvalb-IRES-Cre	ME
754807659	207.27291703224185	0.0190605910876466	-70.18627319335937	0.0663187205791473	10.762500762939451	2.011731581264862	0.0006999999999999	Sst-IRES-Cre	MET
818656110	274.4572162628174	0.033055672221683	-54.76542064121792	0.111605018377304	36.212501525878906	2.444443020117012	0.0006866666666666	Sst-IRES-Cre	MET
713692025	350.6251573562622	0.0177697390416178	-64.24085108439128	0.2584966421127319	30.67187690734864	2.820429581666139	0.00048	Vip-IRES-Cre	MET
762590075	74.21875	0.0050631490689007	-76.03640747070312	0.0140808448195457	10.353124618530272	1.7089529364884697	0.00048	Pvalb-IRES-Cre	MET
646558588	114.68765139579772	0.0060729752033353	-73.23576803768383	0.0291282013058662	13.1328125	1.4130712281067854	0.00034	Pvalb-IRES-Cre	MET
741151617	221.2501466274261	0.021806608256059	-74.11492496066623	0.0077924006618559	15.245834350585938	2.29474001475311	0.0006222222222222	Sst-IRES-Cre	MET
728568706	116.87495559453964	0.007743124881493	-61.59294557571411	0.0094506777822971	26.818750381469727	1.8897302580497104	0.0004599999999999	Sst-IRES-Cre	MET
680563587	272.18738198280334	0.0134587971617234	-62.00778452555338	0.0715855583548545	29.296875	2.527503607196093	0.0005449999999999	Vip-IRES-Cre	MET
753931140	247.8124499320984	0.0219727194825718	-62.40109729766846	0.1288492679595947	49.59749984741211	2.047091337607499	0.0005279999999999	Sst-IRES-Cre	MET
779801478	227.5275439023972	0.0528321233304058	-66.77508500043083	0.0166774317622184	35.7208366394043	2.1551531022394776	0.00054	Sst-IRES-Cre	MET
692802446	59.06248092651367	0.0061420150638195	-70.10099294911261	0.1371391415596008	25.760417620340984	1.4563335363162733	0.00031	Pvalb-IRES-Cre	MET
682128272	175.31265318393707	0.0111994806912534	-79.04002271379743	0.051234908401966	8.932291507720947	2.038595208060672	0.00064	Vip-IRES-Cre	MET
704508818	112.81253397464752	0.0090961195940612	-67.97396621704101	0.0036455504596233	35.34375	2.5808020495356643	0.00048	Sst-IRES-Cre	MET
602231708	723.7712144851685	0.0354241373311911	-73.14400982034617	0.1553562581539154	24.61458396911621	2.137952918869008	0.0006866666666666	Sst-IRES-Cre	MET
754873245	205.5680900812149	0.0325759616745904	-63.54755821228027	0.0048456424847245	32.602081298828125	2.1730633035452773	0.0006599999999999	Sst-IRES-Cre	MET
736834462	295.3124940395355	0.0233038629224325	-69.07583465576172	0.1788027435541153	38.95833969116211	3.058710146422193	0.0005799999999999	Vip-IRES-Cre	MET
714462113	208.82807672023773	0.0096728512044225	-62.43095092773437	0.0240713600069284	47.578125	4.780169694346904	0.00067	Vip-IRES-Cre	MET
728126371	105.46870529651642	0.0074075248565538	-68.91024398803711	0.0775183364748954	30.03125190734864	1.5198589662972566	0.0003449999999999	Sst-IRES-Cre	MET
752276388	106.87503218650818	0.0119216802582291	-62.06179904937744	0.0256738532334566	25.03125190734864	1.886223972054479	0.0005	Sst-IRES-Cre	MET
710767527	171.093687415123	0.0201045591135099	-55.63195657730103	0.0895570963621139	32.781253814697266	1.839163118058524	0.0004399999999999	Sst-IRES-Cre	MET
685749160	203.749880194664	0.0206842819547741	-62.85206731160482	0.107818491756916	33.90625	2.2085009492890046	0.00052	Sst-IRES-Cre	MET
788272042	270.80896496772766	0.0348885941600819	-70.40130823308772	0.1137532070279121	42.19375228881836	2.5165738793084085	0.0006	Sst-IRES-Cre	MET
681800619	186.87500059604645	0.0105609375712291	-64.29073769705636	0.0144294034689664	18.1796875	2.099050499777032	0.00051	Vip-IRES-Cre	MET
718255020	123.43749403953552	0.0075886065440014	-69.59517860412598	0.0580842941999435	44.71875	1.7128725519086192	0.0004199999999999	Sst-IRES-Cre	MET
703288237	275.9374976158142	0.0199698020570754	-66.05826984752308	0.207760140299797	31.859378814697266	3.4044908154905693	0.0005899999999999	Vip-IRES-Cre	MET
812962736	139.34363424777985	0.0092539307772955	-69.6381118774414	0.0700893476605415	48.5625	2.9602827535181744	0.0004799999999999	Vip-IRES-Cre	MET
660722612	216.24988317489624	0.0149509861207428	-62.40101165771485	0.0331155993044376	31.70833396911621	2.153456322711477	0.0004999999999999	Sst-IRES-Cre	MET
754447289	177.1877259016037	0.0176083675917047	-67.3116385719993	0.1242240220308303	32.46875	1.7849604704460251	0.0006599999999999	Sst-IRES-Cre	MET
834532283	177.84373462200165	0.0141880037185611	-72.82880609685725	0.1369750201702118	36.60625076293945	1.518834211335777	0.0004199999999999	Sst-IRES-Cre	MET
688133055	163.59363496303558	0.0170831992359878	-71.42372555202908	0.3290378451347351	41.296875	2.2172111015392053	0.0004399999999999	Sst-IRES-Cre	MET
665129920	215.3126150369644	0.0197487648043095	-67.45707494562322	0.2065975368022918	22.40625	1.934027615400743	0.0005533333333334	Sst-IRES-Cre	MET
714453955	154.21877801418304	0.0229538995757488	-61.59770618785512	0.0809558257460594	30.762500762939453	3.127164192021394	0.000716	Vip-IRES-Cre	MET
693220300	157.96880424022677	0.0090095618739305	-79.67714062859031	0.0476671643555164	32.36606979370117	3.538778884374659	0.000762857142857	Vip-IRES-Cre	MET
665146318	103.74992340803146	0.0081522882308882	-53.742008717854816	0.0263303834944963	12.5859375	2.0927156160541163	0.0009099999999999	Sst-IRES-Cre	MET
844870606	250.65642595291132	0.0141850545981112	-72.07228622436523	0.045209314674139	30.793750762939453	2.891717530698366	0.0006399999999999	Vip-IRES-Cre	MET
803312598	210.87504923343656	0.0100711882243111	-65.2724139873798	0.0572119615972042	35.921875	3.5110286245849744	0.00068	Vip-IRES-Cre	MET
703443928	125.1562088727951	0.0079795059671822	-79.1631088256836	0.0113809574395418	7.609375	1.676976523689333	0.00056	Sst-IRES-Cre	MET
778327002	135.93758642673492	0.009618883762931	-72.45012601216634	0.0585987158119678	32.97187805175781	3.7150665711472777	0.0007899999999999	Vip-IRES-Cre	MET
592819166	204.37514782	0.0081358510935	-72.8043136597	0.0662673860788	28.1187496185	2.73630669569	0.000564	Vip-IRES-Cre	ME
848303073	220.0938761234284	0.0249990376620669	-60.37558555603027	0.0709866732358932	44.58125305175781	2.284106812048694	0.00058	Sst-IRES-Cre	MET
471077857	105.156250298	0.0066757719167	-74.0991973877	0.0280808564276	16.2890625	1.3465538054	0.000335	Pvalb-IRES-Cre	ME
568767467	273.750036955	0.0134296717821	-69.6831665039	0.0381836853921	37.2937507629	2.75178420625	0.000568	Vip-IRES-Cre	ME
741192687	206.562414765358	0.0237874921810915	-69.50177764892578	0.1053094416856765	29.08125114440918	1.7615019585294898	0.00046	Sst-IRES-Cre	MET
750801904	169.68725621700287	0.0199827198370021	-52.215712547302246	0.2239116132259369	37.54464340209961	2.1977110290233246	0.0005514285714285	Sst-IRES-Cre	MET
772584433	115.56262522935867	0.0129877393178497	-67.4204216003418	0.033120047301054	16.842500686645508	1.7043716613670667	0.0004119999999999	Sst-IRES-Cre	MET
788272115	245.50794064998627	0.02404039774701	-66.7941889444987	0.1357402503490448	38.14583206176758	2.003432134159474	0.0005666666666666	Sst-IRES-Cre	MET
329241587	143.74999702	0.016295157195	-70.9986495972	0.0830477774143	25.6927089691	1.33850405863	0.000381666666667	Sst-IRES-Cre	ME
569955315	89.2186313868	0.00652882833458	-70.4392166138	0.0206593926996	10.5187501907	1.45621664013	0.00034	Pvalb-IRES-Cre	ME
687870966	271.5623676776886	0.0326256038994354	-70.66037343343099	0.170659065246582	39.015625	2.093395415402614	0.000615	Sst-IRES-Cre	MET
593646579	258.906245232	0.0175544619967	-65.2210464478	0.0130394836888	24.8906269073	2.51515498027	0.0007	Vip-IRES-Cre	ME
823833593	108.4686815738678	0.0072118062067688	-74.56492360432942	0.0305455680936574	26.23124885559082	1.4240851738388838	0.00036	Pvalb-IRES-Cre	MET
490386426	122.812502086	0.00572888092145	-79.4691696167	0.010418090038	28.09375	1.1844417937	0.000288333333333	Pvalb-IRES-Cre	ME
648311806	166.87491536140442	0.013327896224356	-50.04401779174805	0.0239401217550039	10.90625	2.1904352764284454	0.0008999999999999	Vip-IRES-Cre	MET
718205957	190.78125059604645	0.0160948290922744	-69.57195390973773	0.0280603673309087	29.786460876464844	2.067233964143516	0.0004499999999999	Sst-IRES-Cre	MET
647091206	60.93749776482582	0.0045794948725296	-71.31966400146484	0.0366121754050254	16.78125	1.637841214856918	0.0003649999999998	Pvalb-IRES-Cre	MET
761304075	269.7814404964447	0.0148356055579869	-71.19542277943005	0.0486458577215671	33.56875228881836	3.544779835119486	0.0007399999999999	Vip-IRES-Cre	MET
747025421	195.15608251094812	0.0129590253296049	-68.07510185241699	0.0455537848174572	10.045833587646484	1.8122765729764416	0.0004833333333333	Sst-IRES-Cre	MET
711169038	514.7656798362732	0.0378984002129992	-80.79576432077508	0.2175518870353698	27.23125114440918	1.950382784260269	0.000556	Sst-IRES-Cre	MET
623326230	136.71869039535522	0.0125395646362979	-66.32695828951321	0.1677227616310119	37.578125	1.8281842117704925	0.000425	Sst-IRES-Cre	MET
754807838	212.9686325788498	0.0185861694472305	-55.1594484117296	0.0233802553266286	15.343750953674316	1.8278874568537768	0.0007599999999999	Sst-IRES-Cre	MET
680752163	173.1250286102295	0.0144391186518502	-72.26270348685128	0.0469606481492519	15.165178298950195	1.964369013979536	0.0005085714285713	Sst-IRES-Cre	MET
756659247	75.93745738267899	0.0062176713880629	-73.0917100906372	0.0268138796091079	30.914587020874023	1.5028155682748097	0.0003266666666666	Pvalb-IRES-Cre	MET
839513135	212.50006556510925	0.0126921160490892	-70.36020978291829	0.0208237711340188	6.074999809265137	1.5331066495203738	0.0004199999999999	Sst-IRES-Cre	MET
714945585	368.5939013957977	0.0203075096377239	-48.872216796875	0.0309686455875635	40.64583206176758	3.4448771495748365	0.0007066666666666	Vip-IRES-Cre	MET
806827062	233.59382152557373	0.0304743619888802	-55.6703384399414	0.0661801099777221	-0.2906250357627868	2.275351829964312	0.00071	Sst-IRES-Cre	MET
666219578	111.4063635468483	0.0082477823131914	-64.171048597856	0.0971508026123046	17.48958396911621	1.7406902569212217	0.0004333333333333	Pvalb-IRES-Cre	MET
808891451	181.93751573562625	0.0124136830362804	-67.16873619773172	0.0320923887193203	16.303125381469727	1.767322255742553	0.0005	Sst-IRES-Cre	MET
777417788	279.43751215934753	0.0315931503325061	-77.26838822798295	0.0149976499378681	18.387500762939453	2.805338534621149	0.0006399999999999	Vip-IRES-Cre	MET
642569279	262.1651887893677	0.0186083258928508	-59.73243188858032	0.035594742745161	24.078125	3.3793880596314723	0.0009933333333332	Vip-IRES-Cre	MET
322507839	491.874992847	0.0425699100174	-58.3895721436	0.0494608357549	16.1000003815	1.63644646546	0.000571	Sst-IRES-Cre	ME
579671105	137.343853712	0.00684609675324	-70.1143035889	0.0558033883572	32.5468788147	1.31130509669	0.00028	Pvalb-IRES-Cre	ME
700470340	192.96886026859283	0.0131795741021265	-74.5180418226454	0.0573902241885662	41.68750381469727	3.711102980913883	0.0006399999999999	Vip-IRES-Cre	MET
648836167	228.74999046325684	0.0159584466529338	-65.38696823120117	0.0277270898222923	36.02231979370117	3.1012124189765977	0.0008485714285714	Vip-IRES-Cre	MET
718246985	121.24999612569808	0.0076256350180044	-66.56089782714844	0.1076575592160224	29.33750343322754	1.3149477490801718	0.0003199999999999	Pvalb-IRES-Cre	MET
738587722	267.031192779541	0.0112007302570052	-46.15837898254394	0.0516472682356834	29.51875114440918	2.890904569886273	0.0008599999999999	Vip-IRES-Cre	MET
464368713	138.281241059	0.00595440959407	-79.3491210938	0.0513969436288	14.3214292526	1.32354974465	0.000273571428571	Pvalb-IRES-Cre	ME
648320076	106.25003278255464	0.0131778867333563	-74.5413388338956	0.0834225639700889	28.97916984558105	3.17096172055622	0.0006599999999999	Vip-IRES-Cre	MET
696136783	103.90616953372955	0.0098676538624413	-71.96283340454102	0.055187989026308	42.75	2.8468259686058803	0.0004399999999999	Vip-IRES-Cre	MET
657454163	164.34651613235474	0.0103484579324964	-70.73232126235962	0.0125252874568104	20.625	2.1463338619434618	0.0005399999999999	Sst-IRES-Cre	MET
722883676	100.7811352610588	0.007347381419762	-74.62867228190105	0.0389072820544242	29.109375	1.3461724636383008	0.000325	Pvalb-IRES-Cre	MET
837088348	198.03135097026825	0.007384703120856	-65.37228240966797	0.0211090836673975	43.46875	1.3006650798749728	0.00034	Pvalb-IRES-Cre	MET
705754206	245.7812875509262	0.0175096625056078	-67.75117068820529	0.1060118526220321	36.81250381469727	2.0169898564218824	0.0004999999999999	Sst-IRES-Cre	MET
592868444	190.156176686	0.0128746514994	-76.6464233398	0.0334588810802	34.3229179382	2.7926352643	0.000793333333333	Vip-IRES-Cre	ME
689656936	302.187442779541	0.0324693349649152	-65.84853134155273	0.2719215452671051	25.911460876464844	1.7003885578876747	0.0007099999999999	Sst-IRES-Cre	MET
805672040	247.812569141388	0.0135774790732564	-60.682609211314805	0.0380613096058368	46.515625	3.01657691171848	0.00078	Vip-IRES-Cre	MET
473543792	203.124970198	0.0153622651156	-75.6729812622	0.205063015223	32.0260429382	1.48960693972	0.000355	Sst-IRES-Cre	ME
560690291	229.464381933	0.0139235357573	-63.7912559509	0.0197172705084	29.8125	3.21953538722	0.0008	Vip-IRES-Cre	ME
777065589	138.18751275539398	0.0102528223650292	-72.3001808166504	0.0150258811190724	5.075000286102295	1.921761771573768	0.00072	Sst-IRES-Cre	MET
575919223	273.281216621	0.0150392119165	-64.7906646729	0.0983211547136	39.53125	3.10667852593	0.00051	Vip-IRES-Cre	ME
666236024	169.53109204769137	0.0172818249230085	-69.5905876159668	0.1424995064735412	25.71875	2.20883754964947	0.0005399999999999	Sst-IRES-Cre	MET
658019448	330.31249046325684	0.021506026469932	-68.66369018554687	0.080156922340393	5.000000476837158	2.2976144149032365	0.00073	Sst-IRES-Cre	MET
679613561	169.3749576807022	0.0112882831226939	-72.61238791725852	0.2366459518671035	28.1015625	2.2482361640538286	0.0003849999999999	Vip-IRES-Cre	MET
570946690	93.5938283801	0.00718494169964	-70.4970932007	0.00695316726342	27.3687496185	1.26291695977	0.000308	Pvalb-IRES-Cre	ME
716477575	196.0938572883606	0.0098461858662861	-76.10791625976563	0.0179281346499919	30.47916603088379	3.024518775874091	0.00068	Vip-IRES-Cre	MET
671544471	110.93764752149582	0.0065927205399512	-73.51154674183239	0.0701717436313629	17.85416603088379	1.4283921947192555	0.0003466666666666	Pvalb-IRES-Cre	MET
679883928	214.53124284744263	0.0166010545806333	-69.78900464375813	0.0639403164386749	21.258928298950195	1.786955521596179	0.0004485714285714	Sst-IRES-Cre	MET
704115865	362.3437881469727	0.0376306411850708	-66.16381301879883	0.200614333152771	40.390625	1.9197646900684529	0.0005949999999999	Sst-IRES-Cre	MET
751269017	212.8124088048935	0.0251463142463168	-57.46869786580404	0.1392585486173629	39.47500228881836	1.7557127248876014	0.0004399999999999	Sst-IRES-Cre	MET
480187546	117.187544703	0.00800959897865	-70.2343597412	0.0348579436541	42.5374984741	1.74914611874	0.000363	Sst-IRES-Cre	ME
660722845	410.468727350235	0.0401372229772793	-63.19030990600586	0.0283015985041856	28.51041984558105	2.612561168606344	0.0007733333333333	Sst-IRES-Cre	MET
703591588	207.4999213218689	0.0154911689290883	-78.09511032104493	0.0486507825553417	30.79464449201312	2.133187952559068	0.0005971428571428	Sst-IRES-Cre	MET
718247077	65.93745946884155	0.0050470038207399	-76.19081211090088	0.0262920260429382	14.755208015441896	1.4964973109919326	0.0003233333333333	Pvalb-IRES-Cre	MET
694162598	322.3437368869781	0.0146448211493221	-65.2648426936223	0.1244958862662315	27.6875	2.645577420956413	0.0005100000000001	Vip-IRES-Cre	MET
707179690	265.1563882827759	0.0279286836943777	-59.80885620117188	0.1642410308122635	20.40972137451172	2.4956875714810733	0.0008022222222221	Sst-IRES-Cre	MET
820917420	150.33993124961853	0.0071880084622773	-73.0503176175631	0.0410241857171058	28.049999237060547	1.7106913215251929	0.0004199999999999	Pvalb-IRES-Cre	MET
680424620	191.09374284744263	0.0095358846906009	-71.96299285888672	0.0844222977757453	34.90625190734863	3.558638053361705	0.0005574999999999	Vip-IRES-Cre	MET
758027440	229.06245291233063	0.0291810275017676	-57.58518629807692	0.0063803996890783	6.228125095367432	1.9834975882173056	0.0005999999999999	Sst-IRES-Cre	MET
797652145	231.4489334821701	0.0157652092323829	-62.43627497355144	0.0329259000718593	34.75833257039388	3.3441500824546444	0.00078	Vip-IRES-Cre	MET
787961013	213.59366178512573	0.0207409404742965	-70.11626434326172	0.0569141879677772	3.237500190734864	1.9115977288569952	0.0007899999999999	Sst-IRES-Cre	MET
704394422	236.2498790025711	0.0237237689879097	-72.62939661199397	0.0691721215844154	31.3203125	2.535900380834235	0.0005949999999999	Sst-IRES-Cre	MET
667473084	180.7813197374344	0.0178028927631763	-66.85775693257649	0.1418911516666412	38.23958206176758	2.227611367664828	0.0005666666666666	Sst-IRES-Cre	MET
674419902	232.65621066093445	0.0158195612405649	-69.10929616292317	0.0271603427827358	5.97767972946167	2.0175984759804364	0.0005571428571428	Sst-IRES-Cre	MET
648852680	154.53113615512848	0.0112884826494366	-78.65754648844401	0.1839700937271118	21.44791603088379	2.5791350265350754	0.0004399999999999	Vip-IRES-Cre	MET
808916170	224.75364804267883	0.0354327648933252	-70.21819540170523	0.091693177819252	22.51249885559082	2.307303334115044	0.00074	Sst-IRES-Cre	MET
656880843	243.59390139579773	0.0144647077835758	-68.28856658935547	0.0691412910819053	26.54166984558105	2.793826607782992	0.0005933333333332	Vip-IRES-Cre	MET
807253196	261.31242513656616	0.0279319022005219	-73.77698170055042	0.0573651939630508	18.000001907348633	2.031828376681274	0.0007	Sst-IRES-Cre	MET
728077517	227.8124988079071	0.0176958894311728	-74.55087619357639	0.0866159796714782	32.29166793823242	2.284376821825155	0.00052	Sst-IRES-Cre	MET
906695884	270.9975242614746	0.0173924379672129	-65.85696220397949	0.1203790083527565	33.86875534057617	2.673609815997153	0.0005399999999999	Vip-IRES-Cre	MET
486896849	52.3437894881	0.00434553786102	-75.7674865723	0.0390145964921	17.1614589691	1.24902792342	0.00022	Pvalb-IRES-Cre	ME
475542743	178.281292319	0.0157179763689	-73.3044967651	0.0684260651469	36.2562484741	2.13843453545	0.000532	Sst-IRES-Cre	ME
754840804	272.5001275539398	0.0268546045155022	-49.90713405609131	0.0598244555294513	43.70625305175781	1.9138754062396384	0.0006	Sst-IRES-Cre	MET
756102373	158.90635550022125	0.0115219631920246	-75.31720818413629	0.0192832928150892	4.675000190734863	2.0790202416960413	0.0004999999999999	Pvalb-IRES-Cre	MET
657675492	158.4376096725464	0.0235402751667616	-64.75794525146485	0.2457074522972107	39.25	1.9204593605287643	0.0004999999999999	Sst-IRES-Cre	MET
484742372	128.906175494	0.00534349879966	-75.9636611938	0.0333370417356	16.9624996185	1.28375751421	0.000284	Pvalb-IRES-Cre	ME
560690405	393.749654293	0.0226240312766	-71.8508605957	0.204979836941	20.4562511444	2.48654342181	0.00052	Vip-IRES-Cre	ME
718877932	91.40639752149582	0.0073583076386383	-72.52330684661865	0.0573850274085998	5.265625	1.5303498253710637	0.000355	Pvalb-IRES-Cre	MET
892400880	115.9062162041664	0.006828183678028	-67.06706364949544	0.0993834137916565	32.150001525878906	1.3248238216165094	0.0003199999999999	Pvalb-IRES-Cre	MET
692843780	101.40609741210938	0.0073327425631362	-69.39236831665039	0.0634718835353851	24.21875190734864	1.5324839477836203	0.00032	Pvalb-IRES-Cre	MET
839537924	157.0936143398285	0.0154750444493188	-66.4840316772461	0.1009671315550804	37.962501525878906	2.199882958662017	0.0006	Sst-IRES-Cre	MET
809006343	106.03129863739014	0.0069000434002233	-74.30179850260417	0.0579432845115661	22.251251220703125	1.52571973488734	0.0004	Pvalb-IRES-Cre	MET
710743304	220.46859562397003	0.0227196290463187	-56.48171265920004	0.1643638461828231	32.46428680419922	1.7793243419514493	0.0004314285714285	Sst-IRES-Cre	MET
803075341	225.1322418451309	0.0303479494058201	-60.52789514715021	0.0914562866091728	28.8125	1.955073477082542	0.0006799999999999	Sst-IRES-Cre	MET
698586385	126.25007331371307	0.0073584308732418	-66.13443438212077	0.0080455401912331	26.52499961853028	1.5332377802769628	0.00038	Pvalb-IRES-Cre	MET
845640977	95.78132629394533	0.0095353639804372	-72.81229608709162	0.0589405260980129	22.62812614440918	1.5358993826974836	0.00036	Pvalb-IRES-Cre	MET
711202068	165.31243920326233	0.0138122011925779	-56.69969783109777	0.0207684393972158	21.75446510314941	1.9080334041792109	0.0006999999999999	Sst-IRES-Cre	MET
751932693	270.93732357025146	0.0128943787920632	-75.15325588650174	0.0594430826604366	9.768750190734863	1.848788090832716	0.00068	Sst-IRES-Cre	MET
779801880	300.288587808609	0.0291753933454645	-69.9455509185791	0.1648629605770111	38.94374847412109	2.432519533353064	0.0006599999999999	Sst-IRES-Cre	MET
714904858	172.18749225139618	0.0094606690706463	-74.0434181213379	0.0548014268279075	36.71354293823242	3.829355391268635	0.00074	Vip-IRES-Cre	MET
738768160	310.1562261581421	0.0153192567559259	-70.12322082519532	0.0916797071695327	32.82500076293945	2.807332056722178	0.0004299999999999	Vip-IRES-Cre	MET
478958894	82.5000405312	0.00678271966554	-69.6435470581	0.0312513895333	17.6302089691	1.5989405595	0.000329166666667	Pvalb-IRES-Cre	ME
795563325	206.90619945526123	0.0168543561360724	-73.70839309692383	0.0789618864655494	34.24687576293945	2.070450710780439	0.0006199999999999	Sst-IRES-Cre	MET
482735425	324.218779802	0.035316507649	-71.400062561	0.185133472085	35.7265625	1.59439545297	0.00039125	Sst-IRES-Cre	ME
500864322	55.156249553	0.00474296618935	-81.5586166382	0.0342279411852	29.1499996185	1.28214227779	0.0003	Pvalb-IRES-Cre	ME
699495755	89.37489986419678	0.0060237632203613	-67.11269051688058	0.0538925044238567	20.96875	1.910983537907278	0.0004399999999999	Pvalb-IRES-Cre	MET
726357324	314.6876096725464	0.0218337952905506	-66.3036543528239	0.1087980717420578	37.375	1.955643044575012	0.0004866666666665	Sst-IRES-Cre	MET
766088528	107.4998825788498	0.007784969965026	-74.44435214996338	0.081640601158142	28.26875114440918	1.4332310210129269	0.0002999999999999	Pvalb-IRES-Cre	MET
792728913	291.6874587535858	0.0189410131921485	-69.28638534545898	0.0126344254240393	23.75625228881836	1.9286305241012065	0.0004999999999999	Sst-IRES-Cre	MET
485184849	63.2810592651	0.00544291013971	-75.2600402832	0.136888489127	20.5375003815	1.26135484164	0.000238	Pvalb-IRES-Cre	ME
480171348	71.2501108646	0.00527645104792	-73.8435668945	0.0188077818602	24.7374992371	1.21139650395	0.000254	Sst-IRES-Cre	ME
322229594	249.330356717	0.0216792470872	-65.5227432251	0.125099852681	10.8984384537	1.63105249517	0.00049875	Sst-IRES-Cre	ME
842904923	111.23163253068924	0.007830152691599	-64.83781918612394	0.0555734187364578	33.599998474121094	1.5391208166511403	0.0003199999999999	Pvalb-IRES-Cre	MET
756692316	87.81280368566513	0.0088349348690185	-65.08247629801433	0.2149892002344131	18.387500762939453	1.481619922474767	0.00036	Pvalb-IRES-Cre	MET
760305000	144.37521994113922	0.007740555709455	-76.46238708496094	0.0095540778711438	2.918750286102295	2.0066244827507704	0.0006599999999999	Sst-IRES-Cre	MET
674436459	269.3749070167541	0.0159869903202915	-75.75139617919922	0.0115118203684687	-0.3281252384185791	2.374274121120581	0.0008	Sst-IRES-Cre	MET
759772525	190.62499701976776	0.0134654676344706	-73.86852931976318	0.2081601917743683	32.35625076293945	2.78526670217211	0.00048	Vip-IRES-Cre	MET
602535278	224.73958134651184	0.0194392184530664	-70.28506469726562	0.2036629915237426	8.388392448425293	1.898852797025613	0.0005999999999999	Sst-IRES-Cre	MET
490173806	186.718642712	0.0113282610407	-76.3768463135	0.127457618713	23.1015625	1.82917491978	0.00043625	Sst-IRES-Cre	ME
794948976	308.9686930179596	0.0336301719251573	-69.45522516424006	0.2776619493961334	35.224998474121094	2.3748237021358007	0.00058	Sst-IRES-Cre	MET
591639922	93.5937836766	0.0046973329131	-72.2584457397	0.0602537766099	27.8187522888	1.48175465901	0.00032	Pvalb-IRES-Cre	ME
485455219	126.56250596	0.00905135085577	-71.4529953003	0.0360309518874	22.75	1.48351654497	0.000419166666667	Sst-IRES-Cre	ME
710784375	217.9688513278961	0.0158758774689218	-61.10114312171936	0.1883373856544494	16.859375	1.721235134604091	0.0006899999999998	Sst-IRES-Cre	MET
666178937	196.406289935112	0.0177663204029335	-68.58597259521484	0.0166440103203058	29.91666984558105	2.107542281566274	0.0004399999999999	Sst-IRES-Cre	MET
475542907	145.156368613	0.0115058762218	-71.7351760864	0.0237218122929	28.8562526703	1.50188056798	0.000404	Sst-IRES-Cre	ME
758142335	201.71870291233063	0.0113109089680181	-68.0176944732666	0.1593543142080307	35.97500228881836	2.2940787832449785	0.0003799999999999	Vip-IRES-Cre	MET
765793664	126.56249105930328	0.0090566031558466	-72.41702575683594	0.0048504541628062	15.293750762939451	1.608334277078452	0.0003999999999999	Pvalb-IRES-Cre	MET
795833727	169.06249523162842	0.0178995006328432	-71.0637928889348	0.0989239290356636	42.51874923706055	2.036330958503416	0.0005	Sst-IRES-Cre	MET
750794115	485.1703643798828	0.0354332828139282	-47.91448423597548	0.1219183206558227	38.95624923706055	2.490365674327233	0.0008199999999999	Sst-IRES-Cre	MET
692794769	117.96870827674866	0.0081242226428728	-63.14792323112488	0.0220109317451715	25.57812595367432	1.5985929866835753	0.00038	Pvalb-IRES-Cre	MET
485455249	132.812470198	0.0104628633615	-73.2325744629	0.0304666571319	26.3046875	1.65161350079	0.00040125	Sst-IRES-Cre	ME
837080471	134.75005328655243	0.0067771269574406	-75.00395584106445	0.0762208476662635	31.33749961853028	1.657391689220569	0.0004399999999999	Pvalb-IRES-Cre	MET
704402841	208.2812786102295	0.0134219950083636	-72.68288345336914	0.0566955991089344	17.41015625	1.5951554420726213	0.0006499999999999	Sst-IRES-Cre	MET
572609946	126.919537783	0.0077394982791	-67.3979644775	0.0246973820031	18.1687507629	1.53924014228	0.00034	Pvalb-IRES-Cre	ME
501282204	132.656246424	0.0175921235915	-73.6015090942	0.184340372682	32.84375	1.95227771667	0.00042	Sst-IRES-Cre	ME
823702943	146.40644192695618	0.0091335351933072	-65.4798073401818	0.0424622967839241	28.856250762939453	1.802943202064252	0.0003699999999999	Pvalb-IRES-Cre	MET
674420128	365.15626311302185	0.036230407400565	-70.6084906838157	0.1419881582260131	22.93402862548828	1.960871289719318	0.000531111111111	Sst-IRES-Cre	MET
848278944	159.92651879787445	0.0152155945191643	-74.20441563924153	0.0229795575141906	33.443748474121094	2.245088504657008	0.0006	Sst-IRES-Cre	MET
740660643	231.87503218650812	0.0341313067349429	-58.4916787147522	0.0369565710425376	40.59687805175781	3.01135791172998	0.00072	Sst-IRES-Cre	MET
674502055	182.81234800815585	0.0107384922492901	-65.56040503761984	0.0523353070020675	27.78125	2.102538890718355	0.0004299999999999	Sst-IRES-Cre	MET
754816429	161.09369695186615	0.0169892110676378	-66.01525115966797	0.0342441014945507	40.08125305175781	1.941426467133188	0.0006399999999999	Sst-IRES-Cre	MET
611497391	288.1510555744171	0.0136620164708593	-61.9460551738739	0.0584248676896095	18.950893674577987	2.781375817378945	0.0007971428571428	Vip-IRES-Cre	MET
795530674	211.6875052452088	0.0211437723046428	-66.18629732998934	0.0782819837331771	32.00312805175781	2.1957148517819496	0.0006399999999999	Sst-IRES-Cre	MET
795801013	194.1466927528381	0.0102148491211647	-67.1672030362216	0.0433811284601688	26.07187461853028	1.836910883265748	0.00053	Sst-IRES-Cre	MET
485455285	128.906220198	0.0100769343347	-74.6054000854	0.0122502679005	35.0520896912	1.66317794077	0.000401666666667	Sst-IRES-Cre	ME
685348280	142.8126096725464	0.015733673801801	-75.60591278076171	0.0908061116933822	18.75	1.9749637335969927	0.0004599999999999	Sst-IRES-Cre	MET
760280508	212.4430686235428	0.0256730628756566	-71.17393694425884	0.0802650451660156	26.538543701171875	1.929080849663091	0.0005399999999999	Sst-IRES-Cre	MET
754480577	99.2189347743988	0.006805248536734	-70.12029266357422	0.0110609093680977	36.64374923706055	1.6729328182203902	0.0004199999999999	Pvalb-IRES-Cre	MET
682145219	211.87499165534973	0.0125060486081509	-62.24753443400065	0.083610400557518	26.50000190734864	3.617269772102064	0.00076	Vip-IRES-Cre	MET
718476740	92.96874701976776	0.0078317303923431	-74.37658098008897	0.1025222316384315	10.78125	1.6774549517177593	0.0004899999999999	Sst-IRES-Cre	MET
839218629	136.15630567073822	0.0143900279263554	-71.70901794433594	0.0349742472171783	19.06875228881836	2.1370046772436755	0.00048	Sst-IRES-Cre	MET
823580102	139.0624642372131	0.0077745623717564	-71.27540449662642	0.0288049485534429	24.41250228881836	2.071205288804769	0.0005399999999999	Pvalb-IRES-Cre	MET
696030664	208.12487602233887	0.0239732731636658	-71.08746083577473	0.0193994231522083	21.34375	2.337514687746051	0.0004999999999999	Sst-IRES-Cre	MET
475895240	135.312393308	0.00745435917541	-76.0004272461	0.0552352815866	28.2999992371	1.77701855771	0.000363	Pvalb-IRES-Cre	ME
726357452	106.09378665685654	0.0083583063247967	-72.20985666910808	0.0239842254668474	37.400001525878906	1.678237097977345	0.0003879999999999	Sst-IRES-Cre	MET
484742605	67.1875029802	0.00534118633067	-71.3748321533	0.0331256613135	6.3125	1.40095206073	0.000256666666667	Pvalb-IRES-Cre	ME
705320398	130.46890497207642	0.0142264589664335	-64.07361899481879	0.0798155441880226	35.02083206176758	2.348465245938121	0.00048	Sst-IRES-Cre	MET
579392973	122.812502086	0.00795303845209	-70.5905303955	0.0215552728623	22.9624996185	1.47963369036	0.000328	Pvalb-IRES-Cre	ME
487323089	75.7812857628	0.00568076485695	-79.4327468872	0.0207272395492	14.9583330154	1.48994439448	0.000325833333333	Pvalb-IRES-Cre	ME
716756437	169.53131556510925	0.0112775388192046	-78.58692169189453	0.0455878153443336	31.31770896911621	3.1341347801365256	0.0005899999999999	Vip-IRES-Cre	MET
760313302	292.3434972763061	0.0220110455492206	-74.25590515136719	0.1447778493165969	36.33749771118164	2.479501814537527	0.00078	Sst-IRES-Cre	MET
553006549	141.562536359	0.0106553171243	-73.4675521851	0.0850503742695	39.328125	2.81544793945	0.000616666666667	Vip-IRES-Cre	ME
487306716	91.7188674212	0.0052437827502	-72.919303894	0.0427062027156	21.5874996185	1.21518453344	0.000228	Pvalb-IRES-Cre	ME
670709216	307.4999451637268	0.0178260476489148	-62.799988216824005	0.2167500853538513	30.65625190734864	3.157965054857216	0.00062	Vip-IRES-Cre	MET
837596645	109.81254279613496	0.0082111274050554	-65.53000259399414	0.0404456257820129	29.700000762939453	1.4481378757573675	0.0003199999999999	Pvalb-IRES-Cre	MET
718648809	297.3438501358032	0.0278973431966698	-65.06780548095703	0.1106856614351272	22.37500190734864	2.2207696193068207	0.00062	Sst-IRES-Cre	MET
703165931	336.87490224838257	0.0371128731315424	-69.9430414835612	0.139696329832077	21.95312690734864	2.0344448471747687	0.00059	Sst-IRES-Cre	MET
892442092	142.8123414516449	0.0091015623152003	-69.84383087158203	0.0750363171100616	26.05000114440918	1.4866752031625323	0.0003799999999999	Pvalb-IRES-Cre	MET
760305136	210.62487363815308	0.02023570540306	-50.25564527511597	0.0081353345885872	27.73437690734864	1.9163172053228303	0.0005899999999999	Sst-IRES-Cre	MET
694146546	197.1873790025711	0.0144715811346297	-71.45569055730647	0.0343371592462062	31.53645896911621	3.009154849361846	0.0007366666666667	Vip-IRES-Cre	MET
485053941	65.6248107553	0.00576917778219	-69.8947067261	0.0534711629152	20.25	1.48276442145	0.000322	Pvalb-IRES-Cre	ME
762615287	253.28120589256287	0.0143084384975776	-67.9938865661621	0.3022805750370025	15.59375	2.319545467306286	0.0004699999999999	Vip-IRES-Cre	MET
695318015	230.31237721443176	0.0138911283068579	-75.80691320245916	0.1998954862356186	23.56250190734864	2.4600270278796645	0.0004733333333333	Vip-IRES-Cre	MET
809113087	200.78124105930328	0.019635008706196	-68.4380366007487	0.1143518909811973	30.387500762939453	1.8233628214404327	0.00048	Sst-IRES-Cre	MET
594589186	368.593871593	0.016661720342	-60.0557365417	0.015746332705	35.44921875	2.87323243733	0.0006325	Vip-IRES-Cre	ME
470062597	109.843865037	0.00701959908257	-75.12134552	0.0344318971038	17.40625	1.37492444616	0.000285	Pvalb-IRES-Cre	ME
487667205	111.250080168	0.00640340156222	-72.4832305908	0.00985852256417	15.578125	1.40578805563	0.000268333333333	Pvalb-IRES-Cre	ME
711923209	301.71874165534973	0.0346297131960012	-58.10396021062677	0.0135731194168329	23.918750381469728	2.245821825003719	0.000756	Sst-IRES-Cre	MET
657675788	123.59362840652466	0.0124080801687481	-68.8379561106364	0.0304949078708887	28.354167938232425	1.611418739019105	0.0004133333333333	Sst-IRES-Cre	MET
821917200	85.19530296325684	0.0067457268999767	-67.61280604771206	0.0429603643715381	31.9375	1.4849637483811111	0.00034	Pvalb-IRES-Cre	MET
718632464	151.87488496303558	0.0181546782144128	-75.7672836303711	0.0128332581371068	30.918750762939453	2.0186955593231795	0.0006159999999999	Sst-IRES-Cre	MET
807663122	155.3438901901245	0.0117526050196308	-73.02780659993489	0.060656264424324	40.15625	2.007714703857461	0.0004199999999999	Sst-IRES-Cre	MET
648279576	251.7188489437104	0.0108235040658988	-68.02677383422852	0.0801435559988021	47.48958969116211	3.5800042207208893	0.0006066666666667	Vip-IRES-Cre	MET
727823900	210.9375	0.0187245422258864	-69.29954667524858	0.2696118354797363	31.35416603088379	2.208953055327683	0.0004466666666667	Sst-IRES-Cre	MET
718648868	195.62499225139612	0.0115945216709769	-69.32795015970866	0.0833295211195945	11.743749618530272	2.166057140746598	0.0004599999999999	Sst-IRES-Cre	MET
807237159	178.81251871585846	0.0148940706782821	-73.80785508589311	0.0779832154512405	32.21875	1.7658176469557836	0.00048	Sst-IRES-Cre	MET
694867498	135.31257212162018	0.0092040562717382	-60.38526639071378	0.026596188545227	52.30208206176758	3.420565053840411	0.0005699999999999	Vip-IRES-Cre	MET
626153003	144.6613967418671	0.0112373248920982	-69.77822748819987	0.0189097896218299	32.33928680419922	1.9173506383476409	0.0004199999999999	Sst-IRES-Cre	MET
794940971	239.68741297721863	0.0228435104907426	-68.28082968971945	0.0683198124170303	26.77187728881836	2.0447874099687686	0.00059	Sst-IRES-Cre	MET
714405422	308.2811236381531	0.0192493452614428	-66.28693834940593	0.2233606278896331	39.671875	2.9720549552579314	0.0005299999999999	Vip-IRES-Cre	MET
698086962	89.37488496303558	0.0046974935510419	-76.4384536743164	0.0048999083228409	5.8203125	1.4381211498404909	0.00032	Pvalb-IRES-Cre	MET
692565557	276.2500047683716	0.0233640310845618	-71.54974952110878	0.1172777265310287	6.455357551574707	2.0225624910604045	0.0007485714285714	Sst-IRES-Cre	MET
720598581	225.00011324882507	0.0274031222858452	-79.68514845106337	0.1082802638411521	19.4375	2.002442299099947	0.00067	Sst-IRES-Cre	MET
796636728	241.63874983787537	0.0125177963638932	-73.71182196480888	0.150861769914627	28.64375114440918	2.8721954201662845	0.0006599999999999	Vip-IRES-Cre	MET
698570301	140.93761146068573	0.0091076370301772	-68.95418701171874	0.011816706508398	19.459821701049805	1.4026299067812942	0.00032	Pvalb-IRES-Cre	MET
754759234	237.47175931930545	0.02245333527224	-66.43192749023437	0.0748660713434219	21.26875114440918	1.687181923983317	0.00044	Sst-IRES-Cre	MET
760821319	204.1404694318772	0.0239227161041774	-67.87254791259765	0.0564414374530315	31.4375	1.922053587585621	0.0005999999999999	Sst-IRES-Cre	MET
571233863	206.093743443	0.0124407093944	-73.6796035767	0.0307612698525	40.2874984741	2.96347007165	0.000552	Vip-IRES-Cre	ME
741766731	163.75026106834412	0.0124162376959281	-76.04971906873915	0.057785116136074	18.359375	1.6500403588533408	0.0004199999999999	Sst-IRES-Cre	MET
702035537	504.9999952316284	0.0457179117610084	-55.63407940334744	0.0096075199544429	18.20089340209961	2.904301789842944	0.0008057142857142	Sst-IRES-Cre	MET
700413526	294.062614440918	0.0205227458256953	-60.18507385253906	0.09882802516222	30.415178298950195	3.4759171795867543	0.0006428571428571	Vip-IRES-Cre	MET
695998040	88.90636265277863	0.0055921701657854	-75.32803344726562	0.0475128106772899	7.5390625	1.6299790343346814	0.0004049999999999	Sst-IRES-Cre	MET
837064282	153.21876108646393	0.0081508276584571	-68.0679946899414	0.0223828293383121	30.61250114440918	2.0632544544984084	0.00058	Pvalb-IRES-Cre	MET
567006813	164.84375298	0.00956072176363	-70.8131332397	0.0270114932209	44.5250015259	2.97919670936	0.000536	Vip-IRES-Cre	ME
718591584	165.156289935112	0.0160584663212314	-75.86085796356201	0.1508676260709762	30.5	1.596276100541414	0.0004266666666666	Sst-IRES-Cre	MET
892393060	170.1872944831848	0.0097189190294884	-74.72358703613281	0.0403748713433742	22.13125228881836	1.6198111085569633	0.0004299999999999	Pvalb-IRES-Cre	MET
754857573	154.5310914516449	0.0179829607766463	-69.68469323052301	0.157446339726448	14.262499809265137	1.6849869855488	0.00056	Sst-IRES-Cre	MET
808867430	57.65632539987564	0.0050560036251115	-76.60544031316584	0.0239902809262275	27.80624961853028	1.4577629016556637	0.00034	Sst-IRES-Cre	MET
627881581	172.78654873371124	0.014946947560169	-67.79894471168518	0.1079240143299102	31.8203125	1.9390857596900064	0.000415	Sst-IRES-Cre	MET
740177517	362.4218702316284	0.0282538892944505	-67.81319786520565	0.003197381272912	28.743751525878903	1.9223685640145127	0.00048	Sst-IRES-Cre	MET
727766640	233.90640318393707	0.0175965135428615	-69.62782440185546	0.2775847613811493	23.487499237060547	1.3943442863682152	0.0003559999999999	Sst-IRES-Cre	MET
700413556	277.8124511241913	0.0205976098920525	-64.25164455837674	0.0677230432629585	18.40625190734864	3.138920549668041	0.0006399999999999	Vip-IRES-Cre	MET
656979575	254.84389066696167	0.0144919180320011	-73.9630864461263	0.0436958409845829	15.984375	3.432531807455616	0.00075	Vip-IRES-Cre	MET
723416696	111.40640079975128	0.0057097032294014	-67.78948035606972	0.0117482086643576	27.90625095367432	1.1880646771852756	0.000275	Pvalb-IRES-Cre	MET
747009657	215.2842283248901	0.0148592676078741	-66.47199630737305	0.0147714475169777	6.146875381469727	1.7515595735040694	0.00048	Sst-IRES-Cre	MET
804968066	142.99999177455902	0.0135514774042969	-69.34518016468395	0.1147227138280868	33.42499923706055	1.9996480383662485	0.0004199999999999	Sst-IRES-Cre	MET
771995268	218.5339778661728	0.02787431886678	-81.69101476669312	0.0315464735031127	13.821874618530272	2.2776464153195906	0.0005499999999999	Sst-IRES-Cre	MET
799897224	448.4834969043732	0.0363521280437871	-62.03189447191026	0.0673641562461853	18.287500381469727	1.903925973384392	0.0006999999999999	Sst-IRES-Cre	MET
706631307	233.90640318393707	0.0277913104845449	-59.89714431762695	0.1139414608478546	39.41666793823242	2.056435235077448	0.0004733333333333	Sst-IRES-Cre	MET
703141516	325.3124952316284	0.0390572520811279	-61.931287384033205	0.1879478543996811	21.131250381469727	2.4757506702001235	0.000804	Sst-IRES-Cre	MET
805639828	149.87502992153168	0.0166644219798931	-70.40231704711914	0.0715543776750564	38.80000305175781	2.2708217585637307	0.0005399999999999	Sst-IRES-Cre	MET
593655447	366.5625453	0.0209906862226	-59.9847984314	0.0426880903542	11.5446424484	2.26169816536	0.000717142857143	Vip-IRES-Cre	ME
831968920	189.11918997764587	0.0120352796504998	-74.00877939860025	0.0584387965500354	32.250003814697266	3.13645299304369	0.0008	Vip-IRES-Cre	MET
643143322	239.06245827674863	0.0165858003236466	-62.34640388488769	0.0998175367712974	31.15625190734864	2.320818639138785	0.0004599999999999	Vip-IRES-Cre	MET
761820827	194.37521696090693	0.0156195103991863	-70.31004333496094	0.1059135794639587	20.78750228881836	2.974366342575918	0.0006599999999999	Vip-IRES-Cre	MET
806835868	109.65614020824432	0.0068007614273172	-69.7597173055013	0.0392760224640369	38.790626525878906	1.3624930412465	0.0003099999999999	Pvalb-IRES-Cre	MET
668464797	187.9686713218689	0.0105305701356341	-71.30502370198568	0.058078434318304	8.932292938232422	1.989546387000704	0.0005899999999999	Vip-IRES-Cre	MET
626103966	322.9166269302368	0.0410770498230017	-68.21283622409986	0.1938668191432953	24.11328220367432	2.050229872775846	0.0006424999999999	Sst-IRES-Cre	MET
726996635	157.18761086463928	0.0080470270455485	-70.8271131515503	0.0222077760845422	19.40625	1.583561778752641	0.0004299999999999	Sst-IRES-Cre	MET
809088673	247.2811788320541	0.0219681094812954	-71.57238159179687	0.198690265417099	26.41874885559082	1.6372870014699314	0.0004399999999999	Sst-IRES-Cre	MET
886257320	93.56246888637544	0.006601270982394	-80.21683048066639	0.0063772313296794	10.479166984558104	1.4583183037963394	0.00038	Pvalb-IRES-Cre	MET
806844075	340.92187881469727	0.0156239390976934	-58.985961066352	0.1494597196578979	9.57187557220459	2.0024166887052743	0.00076	Sst-IRES-Cre	MET
681391788	282.8124463558197	0.013634914270673	-60.069257736206055	0.0570731498301029	33.57291793823242	3.65349054733006	0.0007399999999999	Vip-IRES-Cre	MET
488707768	101.250037551	0.00424479493227	-75.1085357666	0.017625246197	13.2291669846	1.41283992758	0.000311666666667	Pvalb-IRES-Cre	ME
718165701	181.2498420476913	0.0166338843387348	-57.33995506980202	0.0618079826235771	53.484375	2.16219291844756	0.00058	Sst-IRES-Cre	MET
747050694	330.4687440395355	0.043221586290425	-62.66623401641846	0.098270446062088	41.51875305175781	2.620990127801737	0.00072	Sst-IRES-Cre	MET
802993865	245.31257152557373	0.014143286394257	-71.89096005757649	0.0307110399007797	15.537500381469728	3.4534116333727765	0.0009599999999999	Vip-IRES-Cre	MET
718640845	132.9687535762787	0.0189726428987534	-79.6904411315918	0.1542036086320877	24.83125114440918	2.274909534272989	0.0007079999999999	Sst-IRES-Cre	MET
753858258	204.5314759016037	0.0144600654837069	-67.44195079803467	0.0751180797815322	29.700000762939453	1.8769718708798124	0.0003999999999999	Sst-IRES-Cre	MET
740177619	166.09402000904083	0.0122503225406439	-78.4389181137085	0.0169539283961057	15.551040649414062	2.9419869463366424	0.0009266666666666	Vip-IRES-Cre	MET
648091351	244.68760192394257	0.0136111033513143	-72.94769744873047	0.119018480181694	-8.53125	2.322756694845687	0.00068	Vip-IRES-Cre	MET
753866455	210.15624701976776	0.0234125853594304	-69.25867123074002	0.0989149212837219	14.40000057220459	1.7745560273119303	0.0004199999999999	Sst-IRES-Cre	MET
718886619	105.93749582767488	0.0074820846842112	-67.99720764160156	0.0125329047441482	29.4375	1.588836048193021	0.000346	Pvalb-IRES-Cre	MET
648263389	242.34390258789065	0.016986135811758	-66.62080735426683	0.1586164534091949	25.60937690734864	2.768328106747455	0.0005399999999999	Vip-IRES-Cre	MET
697571041	89.06245976686478	0.0055975021861983	-77.42475683038884	0.0164268091320991	14.135416984558104	1.522601895576451	0.0003599999999999	Pvalb-IRES-Cre	MET
898709217	193.2188719511032	0.0123412259488373	-77.82685546875	0.1031588166952133	27.487499237060547	2.634048466651336	0.0006	Vip-IRES-Cre	MET
623326953	169.79169845581055	0.018791706078742	-57.234856367111206	0.1837133169174194	18.97916603088379	1.9354237224410629	0.0005866666666665	Sst-IRES-Cre	MET
837121769	104.60328310728072	0.0075580307471688	-71.16105241041917	0.0145984701812267	19.55989646911621	1.4723674832022262	0.0003683333333333	Pvalb-IRES-Cre	MET
754857707	166.0936325788498	0.0129268441019576	-65.88895924886067	0.0447468236088752	29.12500190734864	1.932393598784249	0.00046	Sst-IRES-Cre	MET
763025133	118.906207382679	0.0101165517532061	-73.68122972760882	0.0302057825028896	14.712499618530272	1.590813883759819	0.0003999999999999	Pvalb-IRES-Cre	MET
473011949	267.812460661	0.0378010821987	-70.2219848633	0.0596156828105	36.2500038147	1.85384490742	0.00050125	Sst-IRES-Cre	ME
832378612	234.12497341632843	0.0126313401596156	-63.967960357666016	0.0464837849140167	36.915626525878906	1.4062066782101754	0.00037	Pvalb-IRES-Cre	MET
681326325	268.28110218048096	0.0094618458028024	-61.72848987579346	0.0139699541032314	4.949999809265137	3.606122497227078	0.000988	Vip-IRES-Cre	MET
756692726	114.06268179416656	0.0065856807552434	-74.89197111129761	0.0164467133581638	25.05312728881836	1.2778410949105958	0.0002899999999999	Pvalb-IRES-Cre	MET
804902647	395.2735662460327	0.0348383887533104	-56.19642167932847	0.1697506159543991	19.451562881469727	2.006848655573339	0.0006499999999999	Sst-IRES-Cre	MET
762615543	114.53112959861755	0.0071760716817522	-72.09005482991536	0.0141031201928853	17.30625057220459	1.5238801323952562	0.00036	Pvalb-IRES-Cre	MET
706221820	162.0313972234726	0.0125170019104737	-72.64989471435547	0.061240192502737	27.55625076293945	1.845081741692644	0.00046	Sst-IRES-Cre	MET
720672510	450.78107714653015	0.0422755961361449	-79.00764993520883	0.1439290046691894	23.97916603088379	2.351919239299713	0.0005699999999999	Sst-IRES-Cre	MET
808875776	194.56437230110168	0.021096334050162	-55.45310320172991	0.0295092593878507	30.35000228881836	2.34648285042056	0.00056	Sst-IRES-Cre	MET
716527368	184.06257033348083	0.0154448626926932	-63.26023356119792	0.0689555704593658	47.50000381469727	3.4897893744330224	0.0007399999999999	Vip-IRES-Cre	MET
738367245	179.2188584804535	0.0102470806663531	-74.32824325561523	0.0479210168123245	30.46249961853028	3.2193968814984046	0.0007199999999999	Vip-IRES-Cre	MET
738039565	149.06233549118042	0.0089834767507782	-75.97765350341797	0.0396921411156654	36.41250228881836	3.0575698773737425	0.0005799999999999	Vip-IRES-Cre	MET
643176208	187.27678060531616	0.0084076319930106	-64.19524145126343	0.0389114581048488	38.76562881469727	2.8586383741402983	0.0004199999999999	Vip-IRES-Cre	MET
739571477	184.84382331371307	0.0114107844473007	-65.62676832411024	0.2280695587396621	18.71249961853028	3.1135847273586625	0.0005399999999999	Vip-IRES-Cre	MET
322246422	203.90625298	0.0120955025227	-75.6354217529	0.0408348329365	25.21875	1.64651237471	0.00042	Sst-IRES-Cre	ME
476100382	167.946323752	0.0138776053414	-68.3402709961	0.0235492996871	23.8624992371	1.95371771815	0.000421	Sst-IRES-Cre	ME
759961376	291.8746769428253	0.022032251237743	-63.14664713541666	0.0454382598400116	31.793750762939453	3.426282979200584	0.0007399999999999	Vip-IRES-Cre	MET
729233190	161.250039935112	0.0155782213672844	-66.30322456359863	0.0682373493909835	31.703125	1.683340195083365	0.0004399999999999	Sst-IRES-Cre	MET
322197295	343.125075102	0.0308693121155	-70.1568450928	0.0152803426608	27.8812503815	2.0368430599	0.000466	Sst-IRES-Cre	ME
729175860	472.3435938358307	0.0377317818136782	-58.71738319396973	0.0702195242047309	18.62500190734864	1.698802103973329	0.0005799999999999	Sst-IRES-Cre	MET
708237126	107.9687476158142	0.0110570528313552	-69.68804723566228	0.0378935150802135	36.38750076293945	2.1039238494784085	0.000468	Sst-IRES-Cre	MET
760297286	173.5938936471939	0.0216336325314938	-78.14619255065918	0.017373289912939	19.503124237060547	2.083915076534252	0.00067	Sst-IRES-Cre	MET
764753738	117.9688423871994	0.0065060955049624	-61.53974394364791	-0.0378375090658664	35.77499771118164	1.5942669865944683	0.00034	Pvalb-IRES-Cre	MET
320247631	158.906206489	0.00667731048737	-75.9061660767	0.0287483744323	22.234375	1.29068046121	0.000355	Pvalb-IRES-Cre	ME
718657362	152.34375	0.0110276179780739	-57.083228371360086	0.0982952788472175	41.3671875	1.56427631503146	0.0004049999999999	Pvalb-IRES-Cre	MET
844945239	143.00018548965454	0.0097813694219775	-64.94196891784668	0.2855005264282226	43.48125457763672	2.061611756787917	0.0003399999999998	Vip-IRES-Cre	MET
478058328	126.093834639	0.00602719683461	-70.5699081421	0.149191066623	39.03125	1.40431379003	0.000319	Pvalb-IRES-Cre	ME
504608602	525.000452995	0.0400137209584	-63.0600013733	0.0300615541637	35.28125	1.76712980517	0.00051	Sst-IRES-Cre	ME
667473755	85.31257510185242	0.00609744799659	-77.8882230122884	0.0160306319594383	17.500001907348633	1.6361696676254731	0.0004266666666666	Sst-IRES-Cre	MET
753702748	267.9685354232788	0.0240588298249684	-72.03069983588324	0.0692735090851783	38.13125228881836	1.981192961529585	0.0006599999999999	Sst-IRES-Cre	MET
694212444	462.0312452316284	0.0120796521325201	-68.82966423034668	0.039098285138607	21.71875	4.281231452652276	0.0007933333333332	Vip-IRES-Cre	MET
482744155	238.28125	0.0203638458678	-66.5560531616	0.0131897740066	24.8812503815	2.03471580048	0.0004	Sst-IRES-Cre	ME
648091488	272.18756079673767	0.0192774675185996	-72.9786595662435	0.0371016077697277	44.05208969116211	3.294346481053596	0.0005399999999999	Vip-IRES-Cre	MET
807262049	205.41372895240784	0.014436931862779	-69.3779622858221	0.0232380554080009	24.28750228881836	1.9564638976942288	0.0005699999999999	Sst-IRES-Cre	MET
727824228	147.03139662742615	0.0084344069159145	-75.33095855712891	0.0322209820151329	32.250003814697266	1.5263192713184506	0.000388	Sst-IRES-Cre	MET
848279397	249.99086558818817	0.0213242816880469	-73.3622548029973	0.0708745941519737	24.92500114440918	2.2114505850394326	0.0005	Sst-IRES-Cre	MET
751974246	157.8126847743988	0.0135457971016863	-72.33232116699219	0.0486611686646938	24.20625114440918	1.8356170654075863	0.0004999999999999	Sst-IRES-Cre	MET
704411495	149.8437225818634	0.009915173993868	-53.850375747680665	0.1242938116192817	37.275001525878906	1.6280123139775078	0.0003879999999999	Sst-IRES-Cre	MET
576411497	263.281047344	0.0151840605553	-75.4721374512	0.0182531867176	30.1250019073	2.83560350858	0.000733333333333	Vip-IRES-Cre	ME
765859691	78.2812088727951	0.0073423471333655	-67.85340372721355	0.0678943172097206	26.74249839782715	1.555941277303369	0.00036	Pvalb-IRES-Cre	MET
772126576	175.68737268447876	0.0134313274394782	-68.33153228759765	0.0944875478744506	30.11250114440918	1.833075975222264	0.0004199999999999	Sst-IRES-Cre	MET
684857201	307.96873569488525	0.024823620182072	-55.74597467694964	0.1835948973894119	10.317708015441896	1.5586650477410833	0.0005066666666666	Sst-IRES-Cre	MET
795572082	236.2811267375946	0.0218246269030311	-72.16664428710938	0.0691415667533874	4.706250190734863	2.0804980758638965	0.0008799999999999	Sst-IRES-Cre	MET
732542835	118.43764781951904	0.0071052349864628	-63.66333813137479	0.0761461034417152	35.63750076293945	1.5751277965199404	0.0003599999999999	Pvalb-IRES-Cre	MET
805697399	245.37509679794312	0.0155676946503018	-58.19366524436257	0.1252566874027252	34.42500305175781	2.95433758739655	0.0005	Vip-IRES-Cre	MET
584587128	194.062530994	0.0141001536105	-74.3997421265	0.125031679869	35.6796913147	2.90241730884	0.000735	Vip-IRES-Cre	ME
667473785	123.90635907649994	0.0104573936934125	-68.4371836735652	0.1216564998030662	25.00000127156576	1.6702408941362703	0.0003799999999999	Sst-IRES-Cre	MET
760280955	239.68733847141263	0.017292077304159	-64.93611907958984	0.1015741825103759	13.443751335144045	1.8618809216869832	0.00056	Sst-IRES-Cre	MET
727897981	206.5626084804535	0.0185582284289491	-70.45509931776259	0.2432785630226135	35.57500076293945	1.5341222302360742	0.0004039999999999	Sst-IRES-Cre	MET
819836801	326.96622610092163	0.0318647690734969	-58.26898981730143	0.0408846661448478	44.48750305175781	1.821873090729052	0.00058	Sst-IRES-Cre	MET
500864898	158.906280994	0.0089835345554	-68.9107208252	0.0123020680621	13.21875	1.41140690032	0.00038	Pvalb-IRES-Cre	ME
569997187	154.375001788	0.00793463015283	-72.8814620972	0.0380950383842	27.1499996185	1.54251874292	0.000364	Pvalb-IRES-Cre	ME
692590468	255.9375762939453	0.0165318403903314	-67.63896484375	0.2398804873228073	29.16666603088379	2.9769163380374466	0.0005333333333332	Vip-IRES-Cre	MET
808867724	269.6875035762787	0.0228439518225294	-67.83671639182351	0.1361133009195327	17.73750114440918	1.948540942526872	0.0005399999999999	Sst-IRES-Cre	MET
754497427	140.7812088727951	0.0074112089362186	-69.9694578382704	0.0128537463024258	12.914584159851074	1.5901364433570988	0.0004399999999999	Pvalb-IRES-Cre	MET
720566168	230.00003397464752	0.01426815674465	-76.14008465935203	0.1056695505976677	31.796875	2.321657700210067	0.0006099999999999	Sst-IRES-Cre	MET
706475936	201.09371840953827	0.0187800697747878	-49.56689872741699	0.2381961941719055	43.93359375	2.0155396428561305	0.0005125	Sst-IRES-Cre	MET
741816227	217.0984447002411	0.0190028333271257	-67.49041539972478	0.3225283622741699	38.80624771118164	1.770487590022241	0.00042	Sst-IRES-Cre	MET
466245544	115.000002086	0.00689672173034	-71.0717010498	0.0793210864067	24.609375	1.41722858356	0.00034	Pvalb-IRES-Cre	ME
567007144	290.781348944	0.0215337956256	-66.6093139648	0.0407045707107	36.8348197937	3.47286457774	0.000631428571429	Vip-IRES-Cre	ME
808859562	376.9687116146088	0.0368571714182702	-60.34286360307173	0.0379995554685592	51.07500457763672	2.124770638778532	0.0006	Sst-IRES-Cre	MET
753678257	239.68753218650812	0.0238608956783961	-67.64397091335721	0.0627295672893524	37.400001525878906	1.4756523671659465	0.0005399999999999	Sst-IRES-Cre	MET
642791355	167.96885430812836	0.0089710404984786	-62.03187026977539	0.088318146765232	28.921875	2.9172359447028104	0.00046	Vip-IRES-Cre	MET
702027710	144.3749964237213	0.0190487228464287	-66.28985665061258	0.2526474893093109	42.640625	1.8424749288937008	0.00042	Sst-IRES-Cre	MET
703133631	251.2499988079071	0.0230571475883505	-66.70480728149414	0.0302908867597579	31.59375	2.379463686201813	0.0006333333333332	Sst-IRES-Cre	MET
845584320	103.30531746149065	0.0087760301662464	-60.13976256052653	0.0147214476019144	26.03125190734864	1.6715933607374194	0.0003799999999999	Pvalb-IRES-Cre	MET
762763201	161.71854734420776	0.0101446929414651	-72.42158355712891	0.029824886471033	16.631250381469727	1.739719478374813	0.0004399999999999	Pvalb-IRES-Cre	MET
657364930	134.2187523841858	0.0127343301867071	-73.12711933680943	0.0264374874532222	37.01041730244955	2.1129578750690308	0.0005466666666666	Sst-IRES-Cre	MET
324466628	143.906280398	0.0112738631958	-73.186340332	0.0627813786268	41.1687507629	1.80863599279	0.000389	Sst-IRES-Cre	ME
705853382	210.46890318393707	0.0172411729236789	-67.59143229893276	0.1352374702692031	33.55208206176758	2.0414344846976427	0.0005133333333332	Sst-IRES-Cre	MET
646764487	112.96886205673218	0.0071616712774909	-73.95245504379272	0.032411590218544	21.0625	1.3591110574222818	0.0002999999999999	Pvalb-IRES-Cre	MET
491026389	221.0714221	0.0195060169471	-72.0331573486	0.104748919606	22.5625019073	1.6207183559	0.000481	Sst-IRES-Cre	ME
741988310	236.71855032444	0.0309840920679198	-68.8559513092041	0.0956956669688224	21.731250762939453	1.8989187413887467	0.00056	Sst-IRES-Cre	MET
720754651	171.71867191791534	0.012702702202086	-63.10282863270152	0.0155370291322469	29.625	2.279351128918244	0.0005	Sst-IRES-Cre	MET
837072861	94.21874582767488	0.0060216931359537	-71.20577697753906	0.0396328270435333	30.25625228881836	1.7077651683915362	0.0003999999999999	Pvalb-IRES-Cre	MET
751974368	163.90608251094818	0.0091363520385026	-66.03997611999512	0.0410911217331886	21.775894165039062	1.4131367255086082	0.0003542857142857	Sst-IRES-Cre	MET
719067104	111.09359562397005	0.0068536270923804	-61.76256847381592	0.0516111217439174	28.03125063578288	1.4845144980305915	0.0003266666666667	Pvalb-IRES-Cre	MET
659134440	162.96866536140442	0.0104542660793365	-63.80562108357747	0.2022459954023361	43.65625	2.4295060019745733	0.0003999999999999	Vip-IRES-Cre	MET
831829992	275.4298150539398	0.0205935297951297	-53.53000095912388	0.0222687907516956	24.54062557220459	3.5131798694941168	0.00095	Vip-IRES-Cre	MET
657676265	336.0937535762787	0.0193380026767103	-68.00192006429036	0.0910180583596229	-2.802083730697632	2.0527360562043846	0.0007133333333333	Sst-IRES-Cre	MET
750467051	230.19903898239136	0.0161470050506924	-69.96053398980035	0.0524259693920612	29.700000762939453	2.0768997409025736	0.0004799999999999	Sst-IRES-Cre	MET
501798889	345.132231712	0.0201682103372	-75.5577468872	0.109593316913	28.9895839691	1.4655609127	0.00054	Sst-IRES-Cre	ME
707147758	231.24995827674863	0.0220656697114642	-80.57255859375	0.1564230769872665	33.6875	2.527223717090681	0.000592	Sst-IRES-Cre	MET
845625327	113.49990218877792	0.0072832460910483	-68.2499512892503	0.0154519686475396	27.637500762939453	1.5201490719979198	0.0003499999999999	Pvalb-IRES-Cre	MET
473593847	197.343677282	0.017154061833	-74.2608337402	0.0626886636019	36.8187484741	1.83776846209	0.000439	Sst-IRES-Cre	ME
669112312	197.03128933906555	0.0204212977932523	-62.260728200276695	0.0796122401952743	34.21875	2.6396844129415364	0.00078	Sst-IRES-Cre	MET
646805498	105.3125336766243	0.007099260978418	-63.32490130833217	0.0230331756174564	33.5625	1.417390527102496	0.00034	Pvalb-IRES-Cre	MET
647059450	187.81249225139612	0.0133330277570377	-65.18748415433444	0.0281565524637699	38.46875	1.7572263494425735	0.0005749999999999	Sst-IRES-Cre	MET
511244283	107.812575996	0.00622252168385	-68.1200714111	0.0295712258667	21.8187522888	1.34650782135	0.000284	Pvalb-IRES-Cre	ME
753752063	250.62501430511475	0.012983090665865	-70.79894542694092	0.0619903244078159	50.01250076293945	2.1170887252194213	0.0004899999999999	Sst-IRES-Cre	MET
756430849	305.46873807907104	0.0327740279525866	-55.48500781589084	0.0143647007644176	25.62916755676269	1.5755987772160325	0.0005	Sst-IRES-Cre	MET
318543876	205.624997616	0.00841707667429	-63.8540229797	0.0468744002283	4.75	1.47844469751	0.000326666666667	Pvalb-IRES-Cre	ME
795727879	275.156170129776	0.0262712429999331	-62.94430776742789	0.0666588246822357	24.6875	2.1131558340624803	0.0007399999999999	Sst-IRES-Cre	MET
659560459	178.9061278104782	0.0119568838595797	-68.22710418701172	0.0614848174154758	4.531250102179391	1.85413452663404	0.0005599999999999	Sst-IRES-Cre	MET
807303185	338.38245272636414	0.061917247091086	-60.36325102586012	0.0154640870168805	23.243751525878903	2.278502340852584	0.0007199999999999	Sst-IRES-Cre	MET
844806161	301.67075991630554	0.0165958202680573	-62.27090358734131	0.0498718470335006	13.34999942779541	3.16085966124872	0.00092	Vip-IRES-Cre	MET
730789905	220.93746066093445	0.0140392036985371	-67.95160258900036	0.0906723663210868	22.575000762939453	2.838370291907029	0.0005639999999999	Vip-IRES-Cre	MET
695949332	123.2813224196434	0.0138211636185354	-63.73537895896218	0.0384678058326244	30.41071510314941	1.7473235542538683	0.0006628571428571	Sst-IRES-Cre	MET
723597336	95.78120708465576	0.0084767785099474	-63.894038677215576	0.0182815883308649	24.94791984558105	1.4222204982234787	0.0003266666666665	Pvalb-IRES-Cre	MET
322500634	197.187498212	0.0169398135905	-75.3522338867	0.190548092127	27.0125007629	1.58565802697	0.000349	Sst-IRES-Cre	ME
740890651	221.71877324581143	0.0307380164908794	-68.73362636566162	0.1135608330368995	31.75625228881836	2.0771564979273447	0.00064	Sst-IRES-Cre	MET
760018980	106.56242072582243	0.0071044961728716	-69.90610928005643	0.0255280956625938	27.84375190734864	1.6964445980230245	0.0004999999999999	Sst-IRES-Cre	MET
818550823	347.690612077713	0.0443288155801068	-65.39528111049107	0.0383145920932292	35.88541793823242	2.4238072035436087	0.0006933333333333	Sst-IRES-Cre	MET
686086186	204.843744635582	0.0157894071884011	-68.89843156602647	0.1708211153745651	29.53125190734864	2.035655747260142	0.0005000000000001	Sst-IRES-Cre	MET
741742636	245.0000643730164	0.0345687743095698	-65.30498589409723	0.1073873341083526	40.62500381469727	1.9854048468269447	0.00052	Sst-IRES-Cre	MET
739547189	292.4998998641968	0.0254844131549383	-62.4842661077326	0.0570205226540565	37.025001525878906	3.4821774056570027	0.001	Vip-IRES-Cre	MET
705853493	304.9999475479126	0.0421671480637252	-60.60809395530007	0.1294848918914795	35.3125	2.7381674050909712	0.00078	Sst-IRES-Cre	MET
843405366	108.81255567073822	0.0064320932923248	-70.83941955566407	0.0269811917096376	30.793750762939453	1.4677942139997844	0.0004	Pvalb-IRES-Cre	MET
726300728	153.7500023841858	0.0145387652138088	-62.82061958312988	0.0591917894780635	40.57500457763672	2.072583769590161	0.0005359999999999	Sst-IRES-Cre	MET
727791672	425.468772649765	0.0238005700908352	-59.73923835754395	0.1553334295749664	15.893750381469726	2.1432962344337247	0.0006079999999999	Sst-IRES-Cre	MET
769988665	214.5309299230576	0.0122165945434702	-66.0540771484375	0.0468430370092392	23.150001525878903	1.7254906792818323	0.0004299999999999	Sst-IRES-Cre	MET
750786617	236.249715089798	0.0194966122103664	-68.2663106918335	0.1535057127475738	14.460415840148926	1.5583992421033432	0.0004466666666666	Sst-IRES-Cre	MET
656971837	147.34385907649994	0.0110111734521854	-70.52270144507999	0.0687966123223304	25.08750114440918	3.448673178553021	0.000736	Vip-IRES-Cre	MET
728815682	170.15624046325684	0.0102457609969166	-62.45793949473988	0.0494417995214462	30.24375343322754	1.8743433901685709	0.000408	Sst-IRES-Cre	MET
753907785	226.40608251094812	0.0289411735176521	-75.60487810770671	0.0248080939054489	28.20416831970215	2.023822884615113	0.00062	Sst-IRES-Cre	MET
795506764	308.4494471549988	0.0414831192859393	-56.61065646580288	0.1207582354545593	33.57291793823242	1.969422760509305	0.0005766666666666	Sst-IRES-Cre	MET
738859085	199.3749588727951	0.0106505878361585	-45.88757995605469	0.2657910585403442	63.03125762939453	2.215471976133728	0.0004399999999999	Vip-IRES-Cre	MET
487405644	145.625039935	0.00581117045262	-69.5901260376	0.0118438089266	19.7687492371	1.40437055247	0.000322	Pvalb-IRES-Cre	ME
823236692	117.62508004903792	0.0107941141788753	-66.31190213290128	0.0474016815423965	37.36562347412109	1.292678679484557	0.0003099999999999	Pvalb-IRES-Cre	MET
736884821	241.56245589256287	0.0136954341750325	-65.69565667046442	0.240863487124443	40.14999771118164	2.221740360591139	0.00036	Vip-IRES-Cre	MET
839096415	291.28676652908325	0.0161434590642545	-68.22115262349446	0.0759087353944778	18.924999237060547	2.058986220292305	0.0006399999999999	Sst-IRES-Cre	MET
678557792	356.24995827674866	0.012699617474618	-78.11036834716796	0.0303087476640939	4.484375	3.1447583401405703	0.00078	Vip-IRES-Cre	MET
478795872	156.874999404	0.0105061567341	-70.5465011597	0.0633858293295	22.265625	1.53325578536	0.000349166666667	Pvalb-IRES-Cre	ME
715159651	214.9999886751175	0.0136342613987317	-69.53991012573242	0.0658862739801406	37.625	3.3757658215663247	0.000664	Vip-IRES-Cre	MET
591616101	153.125375509	0.0124448554222	-70.1241836548	-0.0254372041672	39.5859375	3.12353427608	0.00092	Vip-IRES-Cre	ME
763025510	82.30769634246826	0.0055450114007487	-70.37100337101863	0.0363138578832149	26.737499237060547	1.4097800419467366	0.00036	Pvalb-IRES-Cre	MET
719108203	196.09354436397552	0.0208497196035286	-64.76855553521051	0.0458340942859649	40.84375	2.193099464742996	0.0005	Sst-IRES-Cre	MET
653817963	354.21890020370483	0.020273797591402	-58.070613861083984	0.0281533133238554	20.31250190734864	3.15290735275246	0.0009400000000001	Vip-IRES-Cre	MET
591517805	287.031292915	0.014462058432	-66.0934371948	0.0215904694051	42.546875	2.70130041853	0.000675	Vip-IRES-Cre	ME
803616879	218.4686958789825	0.0165069309407944	-67.1622792561849	0.032145258039236	36.41249847412109	2.309101216809444	0.00051	Sst-IRES-Cre	MET
834656368	73.68747144937515	0.0061530774472896	-59.65236421064897	0.0241199936717748	36.13125228881836	1.326085007185993	0.0003	Sst-IRES-Cre	MET
648083571	345.15640139579773	0.0151288083696797	-60.903367614746095	0.0398100465536117	49.3828125	4.501722104215347	0.0007	Vip-IRES-Cre	MET
795572344	262.1561884880066	0.0220859376012644	-69.39896697998047	0.0963806211948394	38.62812805175781	2.2711293594270745	0.00053	Sst-IRES-Cre	MET
757192824	136.24991476535797	0.0114681100832161	-79.25361557006836	0.0187560990452766	10.912500381469728	1.6884047323994136	0.0006199999999999	Sst-IRES-Cre	MET
656971906	189.53140079975128	0.0097470448768111	-75.41600112915039	0.0442900471389293	21.63541603088379	2.785498397464963	0.0006733333333333	Vip-IRES-Cre	MET
657594499	326.7187476158142	0.0133908722345644	-67.97039520263672	0.1299777030944824	20.55208396911621	3.206075971282036	0.0007199999999999	Vip-IRES-Cre	MET
490387590	50.3125786781	0.00606688309071	-79.2038497925	0.0917242392898	14.2750015259	1.34700784768	0.000243	Pvalb-IRES-Cre	ME
750811272	117.1874925494194	0.0126918605431777	-65.2338129679362	0.0905854105949401	15.619792938232422	1.9035640349077847	0.0004666666666666	Sst-IRES-Cre	MET
794802318	327.18759775161743	0.0283957839838133	-68.00831118496981	0.2188835442066192	6.162499904632568	2.0164809547044715	0.00092	Sst-IRES-Cre	MET
727259279	175.4688173532486	0.0136398246633902	-57.509169260660805	0.0795559734106063	47.0078125	1.8387298290569216	0.0005049999999999	Sst-IRES-Cre	MET
486783119	84.375038743	0.005490500863	-73.9697570801	0.0347299464047	33.0812492371	1.43805476134	0.00028	Pvalb-IRES-Cre	ME
648272017	179.53120172023773	0.0081726948264937	-71.86379305521648	0.0069789388217031	30.57291984558105	3.5317706705408263	0.0008133333333333	Vip-IRES-Cre	MET
713136280	298.4375059604645	0.0222635673341846	-65.8693359375	0.0290978848934173	22.862499237060547	2.339271842607156	0.000592	Sst-IRES-Cre	MET
726997146	174.0625649690628	0.0076902249985565	-75.21455790201823	0.0224314387887716	12.062500953674316	1.7537743477238523	0.0005199999999998	Sst-IRES-Cre	MET
718755995	167.18749701976776	0.0152061396186239	-66.34577083587646	0.0583342798054218	46.65625	2.3534150096683466	0.00056	Sst-IRES-Cre	MET
823900315	84.34394747018814	0.0071448452699146	-67.14822692871094	0.0351247861981391	30.40625	1.3944339316273888	0.00028	Pvalb-IRES-Cre	MET
703641759	184.5312118530273	0.0132076289437958	-68.66702016194661	0.0545680932700634	25.18750190734864	2.1897937064729365	0.0005399999999999	Sst-IRES-Cre	MET
817199267	153.40617299079895	0.0152999655385449	-65.1789451599121	0.0443108715116977	33.693748474121094	1.9418518137907808	0.00054	Sst-IRES-Cre	MET
760068261	231.40639066696167	0.030466760531	-63.44908142089844	0.1869645118713379	38.70000457763672	2.6793192495096583	0.0006399999999999	Sst-IRES-Cre	MET
729135271	264.8439407348633	0.0446913730348325	-62.67567443847656	0.0714425444602966	42.79375076293945	2.0748434885671854	0.00062	Sst-IRES-Cre	MET
659953832	155.15613555908203	0.0148898687049455	-75.39689309256417	0.0366229936480522	16.84375	1.969522803194784	0.0004999999999999	Sst-IRES-Cre	MET
704755879	187.18746304512024	0.0209842990641931	-70.93394809299045	0.2097444832324981	37.12500381469727	2.2052417162532105	0.00052	Sst-IRES-Cre	MET
324466858	199.375003576	0.0238189992106	-77.7931671143	0.100278250873	23.0625	2.08115117527	0.000615	Sst-IRES-Cre	ME
[truncated: 608 more rows]
