# Supplementary material for: Scaled, high fidelity electrophysiological, morphological, and transcriptomic cell characterization
Source: eLife. 2021 Aug 13;10:e65482. doi: 10.7554/eLife.65482 (PMC8428855; doi:10.7554/eLife.65482)
Supplement: Figure 4—figure supplement 1—source data 2. [file elife-65482-fig4-figsupp1-data2.csv]

sample_id	Lamp5 Krt73	Lamp5 Fam19a1 Pax6	Lamp5 Fam19a1 Tmem182	Lamp5 Ntn1 Npy2r	Lamp5 Plch2 Dock5	Lamp5 Lsp1	Lamp5 Lhx6	Sncg Slc17a8	Sncg Vip Nptx2	Sncg Gpr50	Sncg Vip Itih5	Serpinf1 Clrn1	Serpinf1 Aqp5 Vip	Vip Igfbp6 Car10	Vip Igfbp6 Pltp	Vip Igfbp4 Mab21l1	Vip Arhgap36 Hmcn1	Vip Gpc3 Slc18a3	Vip Lmo1 Fam159b	Vip Lmo1 Myl1	Vip Ptprt Pkp2	Vip Rspo4 Rxfp1 Chat	Vip Lect1 Oxtr	Vip Rspo1 Itga4	Vip Chat Htr1f	Vip Pygm C1ql1	Vip Crispld2 Htr2c	Vip Crispld2 Kcne4	Vip Col15a1 Pde1a	Sst Chodl	Sst Mme Fam114a1	Sst Tac1 Htr1d	Sst Tac1 Tacr3	Sst Calb2 Necab1	Sst Calb2 Pdlim5	Sst Nr2f2 Necab1	Sst Myh8 Etv1	Sst Myh8 Fibin	Sst Chrna2 Glra3	Sst Chrna2 Ptgdr	Sst Tac2 Myh4	Sst Hpse Sema3c	Sst Hpse Cbln4	Sst Crhr2 Efemp1	Sst Crh 4930553C11Rik	Sst Esm1	Sst Tac2 Tacstd2	Sst Rxfp1 Eya1	Sst Rxfp1 Prdm8
P8S4_191126_352_A01	0.04	0.0	0.01	0.0	0.09	0.0	0.0	0.0	0.0	0.01	0.02	0.0	0.09	0.0	0.0	0.0	0.04	0.04	0.0	0.0	0.01	0.02	0.01	0.0	0.0	0.04	0.01	0.01	0.06	0.0	0.01	0.0	0.03	0.01	0.01	0.02	0.0	0.01	0.0	0.0	0.0	0.0	0.0	0.01	0.01	0.0	0.0	0.0	0.02
PXS4_180724_903_A01	0.0	0.0	0.04	0.02	0.02	0.01	0.05	0.0	0.07	0.0	0.05	0.04	0.02	0.0	0.0	0.03	0.15	0.0	0.0	0.0	0.0	0.02	0.0	0.0	0.03	0.14	0.0	0.0	0.0	0.01	0.0	0.0	0.0	0.0	0.0	0.0	0.0	0.0	0.0	0.0	0.0	0.0	0.0	0.0	0.0	0.0	0.0	0.0	0.0
P8S4_191220_351_A01	0.0	0.0	0.0	0.03	0.04	0.07	0.08	0.0	0.0	0.0	0.04	0.0	0.0	0.02	0.1	0.0	0.0	0.0	0.0	0.0	0.0	0.0	0.0	0.0	0.0	0.0	0.0	0.0	0.01	0.02	0.01	0.01	0.04	0.01	0.01	0.03	0.01	0.02	0.0	0.0	0.0	0.01	0.01	0.0	0.0	0.0	0.0	0.0	0.03
P9S4_171113_401_A01	0.0	0.0	0.0	0.0	0.0	0.0	0.0	0.0	0.0	0.0	0.0	0.0	0.0	0.04	0.04	0.02	0.01	0.01	0.01	0.02	0.0	0.0	0.01	0.0	0.01	0.02	0.0	0.01	0.05	0.12	0.0	0.0	0.0	0.0	0.0	0.0	0.0	0.0	0.0	0.0	0.0	0.0	0.0	0.0	0.0	0.0	0.0	0.0	0.0
P2S4_171129_051_A01	0.11	0.0	0.0	0.0	0.0	0.01	0.0	0.0	0.0	0.0	0.08	0.1	0.02	0.0	0.0	0.01	0.09	0.0	0.01	0.0	0.02	0.0	0.02	0.04	0.0	0.03	0.01	0.11	0.0	0.0	0.0	0.0	0.0	0.0	0.0	0.0	0.0	0.0	0.0	0.0	0.0	0.0	0.0	0.0	0.0	0.0	0.0	0.0	0.0
PJS4_200729_801_A01	0.02	0.0	0.0	0.03	0.0	0.0	0.0	0.0	0.0	0.0	0.0	0.0	0.0	0.0	0.02	0.0	0.0	0.0	0.0	0.0	0.0	0.0	0.0	0.0	0.0	0.0	0.0	0.0	0.0	0.01	0.0	0.0	0.0	0.0	0.01	0.0	0.0	0.0	0.0	0.0	0.0	0.0	0.0	0.0	0.0	0.0	0.0	0.0	0.0
PBS4_180827_503_A01	0.0	0.0	0.0	0.0	0.0	0.0	0.0	0.0	0.0	0.0	0.0	0.0	0.0	0.0	0.0	0.0	0.0	0.0	0.0	0.0	0.0	0.0	0.0	0.0	0.0	0.0	0.0	0.0	0.0	0.0	0.0	0.0	0.0	0.0	0.0	0.0	0.0	0.0	0.0	0.0	0.0	0.0	0.0	0.0	0.0	0.0	0.0	0.0	0.0
P8S4_180626_354_A01	0.0	0.0	0.0	0.0	0.0	0.0	0.0	0.0	0.0	0.0	0.0	0.0	0.0	0.0	0.0	0.0	0.0	0.0	0.0	0.0	0.0	0.0	0.0	0.0	0.0	0.0	0.0	0.0	0.0	0.0	0.0	0.0	0.0	0.0	0.0	0.0	0.0	0.0	0.0	0.0	0.0	0.0	0.0	0.0	0.0	0.0	0.0	0.0	0.0
P2S4_180108_056_A01	0.0	0.06	0.04	0.09	0.0	0.0	0.0	0.0	0.0	0.0	0.0	0.0	0.0	0.0	0.0	0.0	0.0	0.0	0.0	0.0	0.05	0.0	0.01	0.02	0.0	0.03	0.0	0.0	0.0	0.12	0.01	0.03	0.01	0.0	0.0	0.02	0.0	0.01	0.0	0.01	0.0	0.0	0.06	0.0	0.01	0.0	0.0	0.0	0.03
P2S4_171023_055_A01	0.01	0.0	0.0	0.0	0.0	0.01	0.01	0.01	0.0	0.02	0.0	0.14	0.02	0.08	0.03	0.0	0.0	0.0	0.0	0.0	0.0	0.0	0.0	0.0	0.0	0.0	0.0	0.0	0.0	0.0	0.0	0.04	0.02	0.0	0.01	0.0	0.01	0.01	0.0	0.0	0.01	0.0	0.02	0.0	0.01	0.0	0.0	0.0	0.02
P2S4_180205_053_A01	0.0	0.0	0.0	0.0	0.0	0.0	0.0	0.02	0.01	0.0	0.01	0.02	0.0	0.0	0.0	0.0	0.0	0.0	0.01	0.02	0.0	0.0	0.0	0.0	0.0	0.0	0.0	0.01	0.01	0.09	0.0	0.0	0.0	0.0	0.0	0.0	0.0	0.0	0.0	0.0	0.0	0.0	0.0	0.0	0.0	0.0	0.0	0.0	0.0
P1S4_180213_001_A01	0.0	0.0	0.0	0.01	0.0	0.0	0.0	0.01	0.0	0.02	0.02	0.01	0.02	0.01	0.04	0.01	0.0	0.0	0.0	0.01	0.0	0.0	0.0	0.0	0.0	0.0	0.0	0.0	0.0	0.11	0.0	0.0	0.0	0.0	0.01	0.0	0.0	0.0	0.0	0.0	0.0	0.0	0.01	0.0	0.0	0.0	0.0	0.0	0.0
P1S4_181210_002_A01	0.07	0.03	0.0	0.27	0.0	0.0	0.0	0.0	0.0	0.0	0.0	0.0	0.0	0.01	0.02	0.0	0.0	0.0	0.0	0.0	0.0	0.0	0.0	0.0	0.0	0.0	0.0	0.0	0.0	0.0	0.0	0.0	0.01	0.0	0.0	0.0	0.0	0.0	0.0	0.0	0.0	0.0	0.0	0.0	0.0	0.0	0.0	0.0	0.0
PBS4_171103_501_A01	0.05	0.01	0.01	0.0	0.03	0.0	0.0	0.0	0.0	0.0	0.0	0.0	0.0	0.0	0.0	0.0	0.0	0.0	0.0	0.0	0.0	0.0	0.0	0.0	0.0	0.0	0.0	0.0	0.0	0.0	0.0	0.02	0.0	0.0	0.0	0.01	0.01	0.0	0.0	0.0	0.0	0.0	0.01	0.0	0.0	0.0	0.0	0.0	0.01
P1S4_180323_002_A01	0.0	0.0	0.0	0.01	0.0	0.0	0.0	0.04	0.0	0.0	0.01	0.0	0.0	0.04	0.08	0.02	0.0	0.0	0.0	0.0	0.0	0.01	0.01	0.0	0.0	0.03	0.0	0.0	0.0	0.0	0.0	0.01	0.03	0.0	0.01	0.0	0.0	0.0	0.0	0.0	0.0	0.0	0.0	0.0	0.0	0.0	0.02	0.0	0.02
PAS4_181015_451_A01	0.0	0.0	0.0	0.0	0.0	0.0	0.0	0.02	0.0	0.0	0.0	0.01	0.0	0.02	0.02	0.0	0.0	0.0	0.0	0.0	0.0	0.01	0.0	0.0	0.0	0.01	0.0	0.0	0.0	0.08	0.0	0.0	0.0	0.0	0.0	0.0	0.0	0.0	0.0	0.0	0.0	0.01	0.0	0.0	0.0	0.0	0.0	0.0	0.0
PES4_190221_651_A01	0.0	0.0	0.02	0.01	0.0	0.0	0.0	0.0	0.0	0.0	0.0	0.0	0.01	0.02	0.01	0.0	0.0	0.0	0.0	0.01	0.0	0.0	0.0	0.0	0.01	0.0	0.01	0.0	0.0	0.08	0.0	0.0	0.0	0.0	0.0	0.0	0.0	0.0	0.0	0.0	0.0	0.0	0.0	0.0	0.0	0.0	0.0	0.0	0.0
P1S4_191004_002_A01	0.0	0.0	0.0	0.0	0.0	0.0	0.0	0.0	0.0	0.0	0.0	0.0	0.0	0.0	0.0	0.0	0.0	0.0	0.0	0.0	0.0	0.0	0.0	0.0	0.0	0.0	0.0	0.0	0.0	0.0	0.0	0.0	0.0	0.0	0.0	0.0	0.0	0.0	0.0	0.0	0.0	0.0	0.0	0.0	0.0	0.0	0.0	0.0	0.0
PAS4_180228_454_A01	0.02	0.0	0.0	0.0	0.0	0.0	0.0	0.01	0.0	0.0	0.02	0.0	0.0	0.0	0.01	0.0	0.0	0.0	0.0	0.0	0.0	0.0	0.0	0.0	0.0	0.01	0.0	0.0	0.0	0.05	0.01	0.0	0.0	0.0	0.0	0.0	0.0	0.0	0.0	0.0	0.0	0.0	0.0	0.0	0.0	0.0	0.01	0.0	0.0
P9S4_171204_403_A01	0.0	0.0	0.0	0.0	0.0	0.0	0.0	0.01	0.01	0.0	0.01	0.06	0.05	0.0	0.0	0.01	0.0	0.0	0.0	0.03	0.0	0.01	0.0	0.0	0.0	0.0	0.03	0.06	0.01	0.07	0.0	0.0	0.0	0.01	0.0	0.0	0.0	0.0	0.0	0.0	0.0	0.0	0.0	0.0	0.0	0.0	0.0	0.0	0.0
P2S4_180327_051_A01	0.01	0.0	0.0	0.0	0.0	0.0	0.0	0.0	0.0	0.0	0.0	0.01	0.0	0.03	0.02	0.0	0.0	0.0	0.0	0.0	0.0	0.0	0.0	0.0	0.0	0.0	0.0	0.0	0.0	0.0	0.0	0.0	0.02	0.0	0.0	0.0	0.0	0.01	0.01	0.0	0.0	0.01	0.0	0.0	0.0	0.01	0.01	0.0	0.0
P8S4_171211_352_A01	0.0	0.0	0.0	0.0	0.0	0.0	0.0	0.0	0.0	0.0	0.0	0.0	0.0	0.0	0.0	0.0	0.0	0.0	0.0	0.0	0.0	0.0	0.0	0.0	0.0	0.0	0.0	0.0	0.0	0.0	0.0	0.06	0.03	0.0	0.02	0.0	0.0	0.01	0.0	0.0	0.0	0.0	0.0	0.0	0.03	0.02	0.03	0.02	0.01
P8S4_190919_352_A01	0.02	0.0	0.02	0.02	0.0	0.01	0.08	0.0	0.0	0.0	0.0	0.0	0.05	0.05	0.01	0.0	0.03	0.02	0.0	0.0	0.0	0.0	0.0	0.0	0.03	0.01	0.01	0.02	0.0	0.0	0.0	0.02	0.03	0.0	0.02	0.01	0.02	0.0	0.0	0.0	0.02	0.0	0.01	0.0	0.0	0.0	0.0	0.0	0.01
P2S4_180312_052_A01	0.03	0.0	0.0	0.0	0.0	0.0	0.0	0.0	0.02	0.03	0.04	0.0	0.0	0.0	0.01	0.0	0.0	0.0	0.0	0.0	0.0	0.0	0.0	0.0	0.0	0.0	0.0	0.01	0.01	0.0	0.0	0.01	0.03	0.03	0.01	0.02	0.0	0.04	0.0	0.0	0.01	0.0	0.02	0.0	0.0	0.01	0.0	0.0	0.0
PJS4_200709_801_A01	0.0	0.0	0.0	0.0	0.0	0.0	0.0	0.0	0.0	0.0	0.0	0.0	0.0	0.0	0.0	0.0	0.0	0.0	0.0	0.0	0.0	0.0	0.0	0.0	0.0	0.0	0.0	0.0	0.0	0.0	0.0	0.05	0.07	0.02	0.03	0.05	0.0	0.06	0.0	0.0	0.02	0.03	0.03	0.02	0.02	0.01	0.07	0.0	0.0
PAS4_171024_452_A01	0.0	0.0	0.0	0.0	0.0	0.0	0.0	0.0	0.0	0.0	0.0	0.0	0.0	0.0	0.0	0.0	0.0	0.0	0.0	0.0	0.0	0.0	0.0	0.0	0.0	0.0	0.0	0.0	0.0	0.0	0.02	0.04	0.04	0.03	0.0	0.06	0.0	0.03	0.0	0.05	0.04	0.0	0.03	0.03	0.01	0.0	0.06	0.0	0.02
PBS4_180827_505_A01	0.02	0.0	0.0	0.0	0.0	0.01	0.01	0.0	0.0	0.0	0.03	0.12	0.01	0.01	0.08	0.0	0.0	0.0	0.0	0.04	0.0	0.04	0.02	0.0	0.0	0.0	0.0	0.0	0.0	0.0	0.02	0.02	0.01	0.01	0.04	0.06	0.01	0.0	0.01	0.0	0.04	0.0	0.03	0.01	0.02	0.01	0.03	0.0	0.02
P9S4_180319_402_A01	0.0	0.0	0.0	0.0	0.0	0.0	0.0	0.0	0.0	0.0	0.0	0.0	0.0	0.0	0.0	0.0	0.0	0.0	0.0	0.0	0.0	0.0	0.0	0.0	0.0	0.0	0.0	0.0	0.0	0.0	0.06	0.0	0.04	0.01	0.07	0.04	0.07	0.0	0.01	0.0	0.11	0.08	0.03	0.02	0.01	0.04	0.0	0.03	0.0
P1S4_190617_002_A01	0.0	0.0	0.11	0.0	0.0	0.04	0.08	0.0	0.0	0.0	0.0	0.0	0.0	0.02	0.19	0.0	0.0	0.0	0.0	0.0	0.0	0.0	0.0	0.0	0.0	0.0	0.0	0.0	0.0	0.0	0.0	0.03	0.03	0.0	0.02	0.03	0.01	0.02	0.0	0.05	0.01	0.0	0.05	0.01	0.02	0.0	0.01	0.0	0.0
PAS4_180731_453_A01	0.0	0.02	0.01	0.01	0.0	0.0	0.01	0.0	0.0	0.0	0.0	0.03	0.16	0.0	0.0	0.0	0.01	0.01	0.09	0.0	0.02	0.03	0.0	0.0	0.0	0.0	0.0	0.0	0.08	0.0	0.0	0.0	0.0	0.0	0.0	0.0	0.0	0.0	0.0	0.0	0.0	0.0	0.0	0.0	0.0	0.0	0.0	0.0	0.0
PAS4_180507_452_A01	0.09	0.08	0.08	0.04	0.01	0.0	0.0	0.01	0.0	0.0	0.12	0.02	0.08	0.0	0.0	0.0	0.0	0.0	0.0	0.0	0.0	0.0	0.0	0.0	0.0	0.0	0.0	0.0	0.0	0.0	0.0	0.03	0.02	0.0	0.01	0.04	0.02	0.0	0.0	0.03	0.01	0.0	0.01	0.01	0.01	0.03	0.04	0.0	0.0
P8S4_180409_358_A01	0.03	0.0	0.0	0.0	0.02	0.0	0.0	0.0	0.0	0.0	0.0	0.1	0.0	0.09	0.0	0.0	0.02	0.0	0.0	0.0	0.0	0.0	0.0	0.0	0.0	0.01	0.0	0.02	0.01	0.0	0.0	0.02	0.04	0.02	0.01	0.03	0.02	0.0	0.01	0.01	0.0	0.0	0.0	0.01	0.0	0.01	0.0	0.0	0.05
P2S4_180423_052_A01	0.0	0.01	0.0	0.01	0.03	0.0	0.0	0.0	0.0	0.0	0.02	0.0	0.05	0.0	0.0	0.0	0.0	0.01	0.0	0.0	0.0	0.0	0.0	0.0	0.0	0.0	0.0	0.0	0.0	0.0	0.0	0.1	0.06	0.03	0.02	0.05	0.06	0.0	0.0	0.05	0.01	0.0	0.04	0.05	0.01	0.0	0.03	0.0	0.01
PAS4_180202_453_A01	0.0	0.0	0.0	0.0	0.0	0.0	0.0	0.0	0.0	0.0	0.0	0.0	0.0	0.0	0.0	0.0	0.0	0.0	0.0	0.0	0.0	0.0	0.0	0.0	0.0	0.0	0.0	0.0	0.0	0.0	0.0	0.08	0.08	0.0	0.05	0.02	0.03	0.05	0.0	0.03	0.01	0.0	0.09	0.02	0.06	0.0	0.05	0.01	0.0
P8S4_171117_351_A01	0.0	0.05	0.02	0.07	0.0	0.0	0.0	0.0	0.02	0.02	0.06	0.0	0.0	0.0	0.01	0.0	0.0	0.0	0.0	0.01	0.01	0.0	0.0	0.0	0.0	0.01	0.0	0.02	0.0	0.0	0.0	0.0	0.0	0.01	0.0	0.0	0.0	0.0	0.0	0.0	0.0	0.0	0.0	0.0	0.0	0.0	0.0	0.0	0.0
PAS4_180406_452_A01	0.0	0.0	0.0	0.0	0.0	0.0	0.0	0.0	0.0	0.0	0.0	0.0	0.0	0.0	0.0	0.0	0.0	0.0	0.0	0.0	0.0	0.0	0.0	0.0	0.0	0.0	0.0	0.0	0.0	0.14	0.0	0.0	0.0	0.0	0.0	0.0	0.0	0.0	0.0	0.0	0.0	0.0	0.0	0.0	0.0	0.0	0.0	0.0	0.0
P1S4_190225_001_A01	0.03	0.0	0.0	0.01	0.08	0.0	0.0	0.0	0.0	0.0	0.0	0.02	0.0	0.0	0.0	0.0	0.0	0.0	0.0	0.0	0.0	0.0	0.0	0.0	0.0	0.01	0.0	0.0	0.0	0.0	0.0	0.0	0.0	0.0	0.0	0.0	0.0	0.0	0.0	0.0	0.0	0.0	0.0	0.0	0.0	0.0	0.0	0.0	0.0
PAS4_180110_454_A01	0.0	0.0	0.02	0.13	0.0	0.0	0.02	0.0	0.0	0.0	0.0	0.0	0.0	0.0	0.0	0.0	0.0	0.0	0.0	0.0	0.0	0.0	0.0	0.0	0.0	0.0	0.0	0.0	0.0	0.0	0.0	0.0	0.01	0.01	0.0	0.0	0.0	0.0	0.0	0.0	0.0	0.0	0.0	0.0	0.0	0.0	0.0	0.0	0.0
PAS4_180615_456_A01	0.14	0.0	0.0	0.03	0.0	0.03	0.0	0.07	0.0	0.0	0.02	0.0	0.17	0.02	0.0	0.0	0.0	0.0	0.0	0.0	0.0	0.0	0.0	0.0	0.0	0.0	0.0	0.0	0.0	0.0	0.0	0.02	0.03	0.02	0.0	0.02	0.0	0.0	0.02	0.0	0.0	0.0	0.01	0.0	0.0	0.0	0.0	0.0	0.02
PBS4_171201_503_A01	0.0	0.0	0.0	0.0	0.0	0.08	0.05	0.08	0.0	0.0	0.04	0.0	0.09	0.0	0.0	0.01	0.04	0.0	0.01	0.01	0.0	0.0	0.0	0.0	0.0	0.0	0.0	0.0	0.0	0.0	0.0	0.0	0.0	0.0	0.0	0.0	0.0	0.0	0.0	0.0	0.0	0.0	0.0	0.0	0.0	0.0	0.0	0.0	0.0
PBS4_180406_505_A01	0.0	0.0	0.0	0.0	0.0	0.0	0.0	0.0	0.0	0.0	0.0	0.0	0.0	0.0	0.0	0.0	0.0	0.0	0.0	0.0	0.0	0.0	0.0	0.0	0.0	0.0	0.0	0.0	0.0	0.0	0.04	0.02	0.06	0.02	0.07	0.06	0.06	0.0	0.0	0.0	0.0	0.0	0.0	0.01	0.02	0.02	0.0	0.03	0.0
PBS4_190114_502_A01	0.01	0.0	0.0	0.01	0.07	0.0	0.03	0.01	0.0	0.0	0.01	0.0	0.02	0.0	0.0	0.0	0.0	0.0	0.0	0.0	0.0	0.0	0.0	0.0	0.0	0.0	0.0	0.0	0.0	0.0	0.01	0.05	0.02	0.05	0.07	0.06	0.04	0.0	0.0	0.02	0.0	0.0	0.01	0.0	0.0	0.0	0.0	0.0	0.0
P8S4_190702_355_A01	0.0	0.0	0.0	0.0	0.0	0.02	0.01	0.0	0.0	0.0	0.02	0.0	0.06	0.0	0.0	0.0	0.0	0.0	0.0	0.0	0.0	0.0	0.0	0.0	0.0	0.0	0.0	0.0	0.0	0.0	0.0	0.0	0.0	0.0	0.0	0.0	0.0	0.0	0.0	0.0	0.0	0.0	0.0	0.0	0.0	0.0	0.0	0.0	0.0
PBS4_180316_502_A01	0.04	0.0	0.0	0.0	0.0	0.0	0.11	0.0	0.0	0.0	0.04	0.0	0.05	0.0	0.0	0.0	0.0	0.0	0.0	0.0	0.0	0.0	0.0	0.0	0.0	0.0	0.0	0.0	0.0	0.0	0.02	0.03	0.06	0.0	0.07	0.03	0.02	0.0	0.0	0.01	0.0	0.0	0.01	0.01	0.02	0.0	0.0	0.06	0.01
P1S4_180205_004_A01	0.0	0.0	0.06	0.0	0.03	0.0	0.0	0.0	0.04	0.02	0.17	0.0	0.0	0.0	0.0	0.0	0.01	0.0	0.0	0.0	0.0	0.0	0.0	0.0	0.0	0.0	0.0	0.0	0.01	0.0	0.0	0.0	0.0	0.0	0.0	0.0	0.0	0.0	0.0	0.0	0.0	0.0	0.0	0.0	0.0	0.0	0.0	0.0	0.0
P1S4_180411_004_A01	0.01	0.0	0.0	0.06	0.03	0.17	0.02	0.0	0.0	0.0	0.0	0.0	0.0	0.06	0.06	0.0	0.01	0.01	0.0	0.01	0.0	0.0	0.0	0.0	0.0	0.0	0.02	0.01	0.01	0.0	0.0	0.0	0.0	0.0	0.0	0.0	0.0	0.0	0.0	0.0	0.0	0.0	0.0	0.0	0.0	0.0	0.0	0.0	0.0
PES4_181008_651_A01	0.0	0.0	0.0	0.0	0.0	0.0	0.0	0.0	0.0	0.0	0.0	0.0	0.0	0.0	0.0	0.0	0.0	0.0	0.0	0.0	0.0	0.0	0.0	0.0	0.0	0.0	0.0	0.0	0.0	0.0	0.0	0.0	0.0	0.0	0.0	0.0	0.0	0.0	0.0	0.0	0.0	0.0	0.0	0.0	0.0	0.0	0.0	0.0	0.0
P9S4_180710_413_A01	0.0	0.0	0.0	0.0	0.0	0.0	0.0	0.0	0.0	0.0	0.0	0.0	0.0	0.0	0.0	0.0	0.0	0.0	0.0	0.0	0.0	0.0	0.0	0.0	0.0	0.0	0.0	0.0	0.0	0.0	0.0	0.0	0.0	0.0	0.0	0.0	0.0	0.0	0.0	0.0	0.0	0.0	0.0	0.0	0.0	0.0	0.0	0.0	0.0
PBS4_181016_506_A01	0.0	0.0	0.0	0.0	0.0	0.0	0.0	0.0	0.0	0.0	0.0	0.0	0.0	0.0	0.0	0.0	0.0	0.0	0.0	0.0	0.0	0.0	0.0	0.0	0.0	0.0	0.0	0.0	0.0	0.0	0.0	0.0	0.0	0.0	0.0	0.0	0.0	0.0	0.0	0.0	0.0	0.0	0.0	0.0	0.0	0.0	0.0	0.0	0.0
P2S4_180411_052_A01	0.0	0.0	0.0	0.0	0.0	0.0	0.0	0.0	0.0	0.0	0.0	0.0	0.0	0.0	0.0	0.0	0.0	0.0	0.01	0.0	0.0	0.0	0.0	0.0	0.0	0.0	0.0	0.0	0.0	0.0	0.0	0.0	0.0	0.0	0.0	0.0	0.0	0.0	0.0	0.0	0.0	0.0	0.0	0.0	0.0	0.0	0.0	0.0	0.0
PAS4_180518_452_A01	0.0	0.0	0.0	0.0	0.0	0.0	0.0	0.0	0.0	0.0	0.0	0.0	0.0	0.0	0.0	0.0	0.0	0.0	0.0	0.0	0.0	0.0	0.0	0.0	0.0	0.0	0.0	0.0	0.0	0.0	0.0	0.0	0.0	0.0	0.0	0.0	0.0	0.0	0.0	0.0	0.0	0.0	0.0	0.0	0.0	0.0	0.0	0.0	0.0
P8S4_171006_352_A01	0.01	0.0	0.07	0.06	0.0	0.05	0.0	0.0	0.09	0.0	0.07	0.0	0.0	0.01	0.03	0.0	0.0	0.0	0.0	0.0	0.0	0.0	0.0	0.0	0.0	0.0	0.0	0.0	0.0	0.0	0.01	0.02	0.01	0.0	0.0	0.0	0.0	0.01	0.0	0.0	0.0	0.0	0.01	0.0	0.0	0.0	0.0	0.0	0.08
P8S4_171115_351_A01	0.0	0.0	0.0	0.0	0.0	0.0	0.0	0.0	0.0	0.0	0.1	0.0	0.07	0.01	0.07	0.0	0.0	0.0	0.01	0.0	0.0	0.0	0.0	0.0	0.0	0.0	0.02	0.03	0.0	0.0	0.0	0.0	0.01	0.0	0.0	0.0	0.0	0.0	0.0	0.0	0.0	0.0	0.0	0.0	0.0	0.0	0.0	0.0	0.0
PBS4_180125_501_A01	0.11	0.0	0.0	0.0	0.0	0.0	0.0	0.0	0.0	0.0	0.02	0.1	0.0	0.0	0.0	0.03	0.01	0.01	0.0	0.0	0.0	0.01	0.0	0.02	0.0	0.0	0.0	0.03	0.04	0.0	0.0	0.0	0.04	0.01	0.03	0.07	0.02	0.03	0.0	0.03	0.02	0.0	0.06	0.0	0.0	0.0	0.01	0.0	0.0
PAS4_180112_452_A01	0.0	0.0	0.01	0.0	0.01	0.0	0.0	0.0	0.0	0.0	0.0	0.0	0.08	0.0	0.0	0.08	0.0	0.01	0.0	0.0	0.02	0.0	0.02	0.0	0.01	0.02	0.0	0.0	0.0	0.0	0.0	0.03	0.06	0.0	0.01	0.01	0.03	0.0	0.01	0.02	0.0	0.0	0.05	0.01	0.0	0.0	0.0	0.01	0.01
P9S4_171027_401_A01	0.0	0.12	0.04	0.01	0.06	0.0	0.0	0.0	0.0	0.0	0.07	0.06	0.03	0.0	0.0	0.0	0.0	0.0	0.0	0.0	0.0	0.0	0.0	0.0	0.0	0.0	0.0	0.01	0.0	0.0	0.03	0.0	0.05	0.03	0.01	0.04	0.0	0.0	0.0	0.0	0.05	0.0	0.01	0.01	0.02	0.03	0.0	0.0	0.03
P8S4_180206_352_A01	0.0	0.0	0.0	0.0	0.0	0.0	0.0	0.0	0.0	0.0	0.0	0.0	0.0	0.0	0.0	0.0	0.0	0.0	0.0	0.0	0.0	0.0	0.0	0.0	0.0	0.0	0.0	0.0	0.0	0.0	0.02	0.06	0.04	0.0	0.03	0.04	0.01	0.01	0.01	0.03	0.0	0.02	0.07	0.0	0.0	0.04	0.07	0.0	0.01
PBS4_180319_502_A01	0.0	0.0	0.0	0.0	0.0	0.0	0.0	0.0	0.0	0.0	0.0	0.0	0.0	0.0	0.0	0.0	0.0	0.0	0.0	0.0	0.0	0.0	0.0	0.0	0.0	0.0	0.0	0.0	0.0	0.0	0.04	0.0	0.05	0.01	0.05	0.09	0.05	0.0	0.0	0.02	0.0	0.0	0.06	0.02	0.01	0.03	0.02	0.0	0.05
PBS4_180629_507_A01	0.01	0.0	0.0	0.13	0.0	0.0	0.0	0.02	0.0	0.0	0.02	0.0	0.15	0.0	0.0	0.07	0.01	0.0	0.0	0.0	0.0	0.0	0.0	0.0	0.0	0.03	0.0	0.0	0.0	0.0	0.01	0.0	0.02	0.04	0.0	0.04	0.0	0.0	0.01	0.02	0.05	0.0	0.01	0.02	0.03	0.0	0.0	0.0	0.02
PBS4_180411_505_A01	0.0	0.1	0.01	0.07	0.0	0.0	0.0	0.0	0.02	0.0	0.02	0.0	0.12	0.0	0.0	0.0	0.0	0.0	0.0	0.0	0.0	0.0	0.0	0.0	0.0	0.0	0.0	0.0	0.0	0.0	0.0	0.05	0.07	0.01	0.0	0.03	0.0	0.0	0.01	0.0	0.0	0.01	0.0	0.05	0.0	0.0	0.0	0.04	0.0
P2S4_180315_052_A01	0.0	0.0	0.0	0.0	0.0	0.02	0.0	0.05	0.0	0.0	0.01	0.0	0.11	0.0	0.0	0.05	0.0	0.0	0.01	0.04	0.0	0.01	0.0	0.0	0.01	0.01	0.0	0.0	0.0	0.0	0.0	0.03	0.01	0.0	0.0	0.03	0.01	0.0	0.0	0.0	0.02	0.0	0.0	0.03	0.01	0.0	0.03	0.0	0.0
P8S4_180706_355_A01	0.11	0.0	0.02	0.03	0.03	0.0	0.0	0.0	0.05	0.0	0.12	0.0	0.0	0.0	0.0	0.01	0.0	0.0	0.0	0.0	0.0	0.0	0.0	0.01	0.0	0.01	0.0	0.0	0.02	0.0	0.01	0.0	0.02	0.0	0.0	0.0	0.02	0.0	0.0	0.01	0.0	0.0	0.0	0.0	0.0	0.01	0.01	0.0	0.0
PAS4_171222_451_A01	0.19	0.0	0.01	0.0	0.0	0.0	0.0	0.0	0.0	0.0	0.0	0.0	0.0	0.02	0.02	0.08	0.0	0.0	0.05	0.0	0.0	0.0	0.0	0.0	0.0	0.0	0.01	0.05	0.03	0.0	0.0	0.07	0.02	0.01	0.0	0.03	0.01	0.0	0.0	0.0	0.0	0.01	0.01	0.0	0.02	0.01	0.0	0.0	0.01
PBS4_180604_503_A01	0.0	0.06	0.01	0.0	0.0	0.0	0.12	0.0	0.0	0.0	0.03	0.0	0.05	0.0	0.07	0.0	0.0	0.0	0.0	0.0	0.0	0.0	0.0	0.0	0.0	0.0	0.0	0.02	0.0	0.0	0.0	0.0	0.0	0.0	0.0	0.0	0.0	0.0	0.0	0.0	0.0	0.0	0.0	0.0	0.0	0.0	0.0	0.0	0.0
PXS4_180723_900_A01	0.0	0.0	0.0	0.02	0.24	0.0	0.0	0.0	0.0	0.0	0.0	0.0	0.09	0.01	0.06	0.02	0.0	0.0	0.0	0.0	0.0	0.0	0.0	0.01	0.0	0.03	0.09	0.0	0.0	0.0	0.03	0.01	0.03	0.01	0.0	0.0	0.0	0.0	0.0	0.0	0.0	0.0	0.0	0.0	0.0	0.0	0.0	0.0	0.04
PAS4_180711_454_A01	0.19	0.0	0.0	0.06	0.0	0.0	0.0	0.0	0.0	0.0	0.01	0.12	0.02	0.0	0.0	0.0	0.0	0.0	0.0	0.0	0.0	0.0	0.0	0.0	0.0	0.0	0.0	0.0	0.0	0.0	0.02	0.01	0.03	0.01	0.01	0.01	0.0	0.01	0.0	0.0	0.0	0.0	0.06	0.0	0.01	0.0	0.02	0.0	0.01
PBS4_171115_506_A01	0.1	0.0	0.0	0.0	0.0	0.01	0.01	0.0	0.0	0.0	0.01	0.0	0.09	0.0	0.0	0.0	0.0	0.0	0.0	0.0	0.0	0.0	0.0	0.0	0.0	0.01	0.0	0.01	0.04	0.0	0.0	0.0	0.0	0.0	0.0	0.01	0.0	0.0	0.0	0.02	0.0	0.0	0.0	0.0	0.0	0.0	0.0	0.0	0.0
P8S4_180123_352_A01	0.11	0.0	0.0	0.08	0.0	0.0	0.01	0.02	0.01	0.0	0.1	0.02	0.06	0.0	0.01	0.0	0.0	0.0	0.0	0.0	0.0	0.0	0.0	0.0	0.0	0.0	0.0	0.0	0.0	0.0	0.02	0.0	0.01	0.0	0.01	0.0	0.01	0.0	0.0	0.03	0.0	0.01	0.0	0.01	0.0	0.0	0.0	0.0	0.0
P1S4_190118_002_A01	0.38	0.0	0.0	0.12	0.03	0.0	0.0	0.0	0.0	0.0	0.0	0.0	0.03	0.0	0.0	0.0	0.0	0.0	0.0	0.0	0.0	0.0	0.0	0.0	0.0	0.0	0.0	0.0	0.0	0.0	0.0	0.0	0.0	0.0	0.0	0.0	0.0	0.0	0.0	0.0	0.0	0.0	0.0	0.0	0.0	0.0	0.0	0.0	0.0
P1S4_180212_002_A01	0.14	0.0	0.0	0.18	0.05	0.0	0.12	0.0	0.0	0.0	0.01	0.02	0.01	0.0	0.0	0.0	0.0	0.0	0.0	0.0	0.0	0.0	0.0	0.0	0.0	0.0	0.0	0.0	0.0	0.0	0.0	0.0	0.0	0.0	0.0	0.0	0.0	0.0	0.0	0.0	0.0	0.0	0.0	0.0	0.0	0.0	0.0	0.0	0.0
PAS4_180306_451_A01	0.0	0.0	0.0	0.26	0.02	0.0	0.07	0.0	0.0	0.0	0.01	0.04	0.0	0.0	0.0	0.0	0.0	0.0	0.0	0.0	0.0	0.0	0.0	0.0	0.0	0.0	0.0	0.0	0.0	0.0	0.0	0.0	0.01	0.0	0.0	0.0	0.0	0.0	0.0	0.0	0.0	0.0	0.01	0.0	0.01	0.0	0.0	0.0	0.0
PAS4_181012_454_A01	0.02	0.0	0.0	0.05	0.0	0.06	0.03	0.01	0.0	0.0	0.03	0.0	0.06	0.0	0.0	0.0	0.05	0.0	0.1	0.06	0.03	0.01	0.0	0.0	0.0	0.03	0.0	0.0	0.0	0.0	0.0	0.0	0.0	0.0	0.0	0.0	0.0	0.0	0.0	0.0	0.0	0.0	0.0	0.0	0.0	0.0	0.0	0.0	0.0
P2S4_180411_055_A01	0.0	0.0	0.0	0.0	0.0	0.0	0.0	0.0	0.0	0.0	0.0	0.0	0.0	0.0	0.0	0.0	0.0	0.0	0.0	0.0	0.0	0.0	0.0	0.0	0.0	0.0	0.0	0.0	0.0	0.0	0.0	0.0	0.01	0.02	0.0	0.0	0.0	0.0	0.0	0.0	0.0	0.0	0.0	0.0	0.0	0.0	0.01	0.0	0.0
P2S4_171003_052_A01	0.0	0.0	0.0	0.0	0.0	0.0	0.0	0.0	0.0	0.0	0.0	0.0	0.0	0.0	0.0	0.0	0.0	0.0	0.0	0.0	0.0	0.0	0.0	0.0	0.0	0.0	0.0	0.0	0.0	0.0	0.0	0.0	0.01	0.0	0.0	0.0	0.0	0.0	0.0	0.0	0.0	0.0	0.01	0.01	0.01	0.0	0.0	0.0	0.0
PAS4_180416_452_A01	0.0	0.0	0.0	0.0	0.0	0.0	0.0	0.0	0.0	0.0	0.0	0.0	0.0	0.0	0.0	0.0	0.0	0.0	0.0	0.0	0.0	0.0	0.0	0.0	0.0	0.0	0.0	0.0	0.0	0.0	0.0	0.0	0.0	0.0	0.0	0.0	0.0	0.0	0.0	0.0	0.0	0.0	0.0	0.0	0.0	0.0	0.0	0.0	0.0
P8S4_180413_354_A01	0.02	0.0	0.0	0.02	0.03	0.12	0.0	0.0	0.0	0.0	0.01	0.01	0.0	0.0	0.0	0.1	0.0	0.0	0.0	0.0	0.03	0.02	0.0	0.0	0.0	0.05	0.0	0.0	0.0	0.0	0.0	0.0	0.0	0.0	0.0	0.0	0.01	0.0	0.0	0.0	0.0	0.0	0.0	0.0	0.0	0.0	0.0	0.0	0.0
PAS4_190218_453_A01	0.0	0.0	0.0	0.0	0.0	0.0	0.0	0.0	0.0	0.0	0.0	0.0	0.0	0.0	0.0	0.0	0.0	0.0	0.0	0.0	0.0	0.0	0.0	0.0	0.0	0.0	0.0	0.0	0.0	0.0	0.0	0.0	0.0	0.0	0.0	0.0	0.0	0.0	0.0	0.0	0.0	0.0	0.0	0.0	0.0	0.0	0.0	0.0	0.0
PAS4_181003_453_A01	0.0	0.0	0.0	0.0	0.01	0.03	0.0	0.0	0.0	0.0	0.0	0.0	0.01	0.0	0.0	0.0	0.03	0.03	0.0	0.01	0.0	0.0	0.01	0.0	0.0	0.0	0.0	0.0	0.0	0.0	0.0	0.0	0.0	0.0	0.0	0.0	0.0	0.0	0.0	0.0	0.0	0.0	0.0	0.0	0.0	0.0	0.0	0.0	0.0
PAS4_190121_451_A01	0.02	0.0	0.0	0.0	0.06	0.0	0.12	0.0	0.0	0.0	0.0	0.0	0.0	0.0	0.0	0.0	0.0	0.0	0.0	0.0	0.0	0.0	0.0	0.0	0.0	0.0	0.0	0.0	0.0	0.0	0.0	0.0	0.0	0.0	0.0	0.0	0.0	0.0	0.0	0.0	0.0	0.0	0.0	0.0	0.0	0.0	0.0	0.0	0.0
P1S4_180806_001_A01	0.01	0.0	0.0	0.0	0.02	0.02	0.0	0.02	0.0	0.0	0.0	0.01	0.0	0.0	0.0	0.0	0.0	0.0	0.0	0.0	0.0	0.0	0.0	0.0	0.0	0.0	0.0	0.0	0.0	0.0	0.0	0.0	0.0	0.0	0.0	0.0	0.0	0.0	0.0	0.0	0.0	0.0	0.0	0.0	0.0	0.0	0.0	0.0	0.0
PAS4_180718_453_A01	0.0	0.0	0.0	0.0	0.0	0.0	0.0	0.0	0.0	0.0	0.0	0.0	0.0	0.0	0.0	0.0	0.0	0.0	0.0	0.01	0.0	0.0	0.0	0.0	0.0	0.0	0.0	0.0	0.0	0.0	0.0	0.0	0.0	0.0	0.0	0.0	0.0	0.0	0.0	0.0	0.0	0.0	0.0	0.0	0.0	0.0	0.0	0.0	0.0
PBS4_180720_501_A01	0.0	0.0	0.0	0.0	0.0	0.0	0.0	0.0	0.0	0.0	0.0	0.0	0.0	0.0	0.0	0.0	0.0	0.0	0.0	0.0	0.0	0.0	0.0	0.0	0.0	0.0	0.0	0.0	0.0	0.0	0.0	0.0	0.0	0.0	0.0	0.0	0.0	0.0	0.0	0.0	0.0	0.0	0.0	0.0	0.0	0.0	0.0	0.0	0.0
PAS4_180906_455_A01	0.0	0.0	0.0	0.0	0.0	0.0	0.0	0.0	0.0	0.0	0.0	0.0	0.0	0.0	0.0	0.0	0.0	0.0	0.0	0.0	0.0	0.0	0.0	0.0	0.0	0.0	0.0	0.0	0.0	0.0	0.0	0.0	0.0	0.0	0.0	0.0	0.0	0.0	0.0	0.0	0.0	0.0	0.0	0.0	0.0	0.0	0.0	0.0	0.0
PBS4_171204_502_A01	0.1	0.0	0.0	0.04	0.03	0.03	0.04	0.0	0.0	0.0	0.01	0.0	0.08	0.0	0.0	0.0	0.0	0.0	0.0	0.0	0.0	0.0	0.0	0.0	0.0	0.0	0.0	0.0	0.0	0.04	0.0	0.01	0.02	0.0	0.0	0.02	0.0	0.0	0.0	0.0	0.0	0.0	0.0	0.0	0.0	0.01	0.0	0.0	0.0
PBS4_180720_503_A01	0.0	0.0	0.0	0.0	0.0	0.0	0.0	0.0	0.0	0.0	0.0	0.0	0.0	0.0	0.0	0.0	0.0	0.0	0.0	0.0	0.0	0.0	0.0	0.0	0.0	0.0	0.0	0.0	0.0	0.0	0.0	0.13	0.06	0.05	0.06	0.01	0.0	0.0	0.0	0.0	0.0	0.08	0.04	0.09	0.01	0.0	0.08	0.0	0.01
PES4_180831_652_A01	0.02	0.0	0.0	0.16	0.03	0.0	0.0	0.0	0.0	0.0	0.0	0.0	0.0	0.0	0.0	0.0	0.0	0.0	0.0	0.0	0.0	0.0	0.0	0.0	0.0	0.0	0.0	0.0	0.0	0.0	0.0	0.0	0.0	0.0	0.0	0.0	0.0	0.0	0.0	0.0	0.0	0.0	0.0	0.0	0.0	0.0	0.0	0.0	0.0
P1S4_180319_003_A01	0.0	0.0	0.0	0.1	0.16	0.23	0.0	0.0	0.0	0.0	0.01	0.0	0.0	0.0	0.0	0.0	0.0	0.0	0.0	0.0	0.0	0.0	0.0	0.0	0.0	0.0	0.0	0.0	0.0	0.0	0.0	0.0	0.0	0.0	0.0	0.0	0.0	0.0	0.0	0.0	0.0	0.0	0.0	0.0	0.0	0.0	0.0	0.0	0.0
PAS4_171005_451_A01	0.0	0.0	0.0	0.17	0.0	0.0	0.0	0.0	0.0	0.0	0.0	0.0	0.0	0.0	0.0	0.0	0.0	0.0	0.0	0.0	0.0	0.0	0.0	0.0	0.0	0.0	0.0	0.0	0.0	0.0	0.0	0.0	0.0	0.0	0.0	0.0	0.0	0.0	0.0	0.0	0.0	0.0	0.0	0.0	0.0	0.0	0.0	0.0	0.0
P1S4_190614_001_A01	0.03	0.0	0.0	0.0	0.09	0.0	0.0	0.03	0.0	0.03	0.07	0.0	0.0	0.0	0.0	0.0	0.01	0.02	0.01	0.11	0.01	0.02	0.0	0.0	0.01	0.01	0.01	0.0	0.0	0.0	0.0	0.0	0.0	0.0	0.0	0.0	0.0	0.0	0.0	0.0	0.0	0.0	0.0	0.0	0.0	0.0	0.0	0.0	0.0
PAS4_180622_455_A01	0.0	0.0	0.0	0.0	0.08	0.0	0.05	0.01	0.0	0.0	0.02	0.0	0.0	0.0	0.0	0.05	0.0	0.0	0.01	0.01	0.0	0.02	0.04	0.0	0.0	0.0	0.0	0.0	0.01	0.0	0.0	0.0	0.0	0.0	0.0	0.0	0.0	0.0	0.0	0.0	0.0	0.0	0.0	0.0	0.0	0.0	0.0	0.0	0.0
P2S4_181017_052_A01	0.07	0.0	0.0	0.0	0.0	0.01	0.0	0.0	0.0	0.0	0.0	0.0	0.0	0.0	0.0	0.0	0.0	0.0	0.0	0.0	0.0	0.0	0.0	0.0	0.0	0.0	0.0	0.0	0.0	0.0	0.0	0.0	0.0	0.0	0.0	0.0	0.0	0.0	0.0	0.0	0.0	0.0	0.0	0.0	0.0	0.0	0.0	0.0	0.0
PAS4_190219_451_A01	0.1	0.01	0.01	0.01	0.06	0.01	0.08	0.0	0.0	0.0	0.0	0.0	0.0	0.0	0.0	0.0	0.0	0.0	0.0	0.0	0.0	0.0	0.0	0.0	0.0	0.0	0.0	0.0	0.0	0.0	0.01	0.01	0.03	0.01	0.01	0.02	0.05	0.0	0.0	0.01	0.01	0.0	0.03	0.04	0.03	0.0	0.0	0.0	0.03
PBS4_180406_506_A01	0.0	0.0	0.0	0.0	0.0	0.0	0.01	0.01	0.0	0.0	0.01	0.02	0.01	0.0	0.0	0.0	0.0	0.0	0.0	0.0	0.0	0.0	0.01	0.0	0.0	0.0	0.0	0.0	0.0	0.0	0.05	0.0	0.02	0.03	0.01	0.04	0.04	0.02	0.0	0.03	0.0	0.0	0.03	0.01	0.05	0.01	0.0	0.0	0.02
P8S4_200709_356_A01	0.0	0.0	0.0	0.0	0.0	0.0	0.0	0.0	0.0	0.0	0.0	0.14	0.1	0.0	0.0	0.0	0.0	0.0	0.0	0.0	0.01	0.0	0.0	0.0	0.0	0.01	0.0	0.0	0.19	0.0	0.0	0.0	0.02	0.0	0.01	0.0	0.0	0.01	0.0	0.0	0.0	0.0	0.02	0.0	0.0	0.0	0.01	0.0	0.0
PBS4_181009_504_A01	0.0	0.0	0.0	0.0	0.0	0.0	0.0	0.0	0.0	0.0	0.0	0.0	0.0	0.0	0.0	0.0	0.0	0.0	0.0	0.0	0.0	0.0	0.0	0.0	0.0	0.0	0.0	0.0	0.0	0.0	0.01	0.05	0.01	0.01	0.0	0.0	0.0	0.0	0.0	0.0	0.0	0.0	0.04	0.06	0.01	0.0	0.0	0.0	0.08
P1S4_180309_001_A01	0.0	0.0	0.0	0.0	0.0	0.0	0.0	0.01	0.09	0.0	0.16	0.0	0.0	0.04	0.0	0.0	0.0	0.0	0.0	0.0	0.0	0.0	0.0	0.0	0.0	0.0	0.0	0.0	0.0	0.0	0.0	0.02	0.02	0.01	0.01	0.03	0.01	0.0	0.0	0.02	0.04	0.0	0.03	0.0	0.0	0.0	0.0	0.03	0.01
P9S4_180413_402_A01	0.07	0.01	0.0	0.03	0.01	0.0	0.0	0.0	0.01	0.01	0.01	0.06	0.0	0.0	0.0	0.02	0.06	0.0	0.0	0.0	0.01	0.05	0.02	0.0	0.0	0.01	0.0	0.0	0.0	0.01	0.0	0.03	0.05	0.01	0.01	0.01	0.02	0.02	0.0	0.0	0.0	0.0	0.01	0.0	0.0	0.0	0.0	0.02	0.0
PBS4_181113_501_A01	0.0	0.0	0.0	0.0	0.0	0.0	0.0	0.0	0.0	0.0	0.0	0.0	0.0	0.0	0.0	0.0	0.0	0.0	0.0	0.0	0.0	0.0	0.0	0.0	0.0	0.0	0.0	0.0	0.0	0.0	0.03	0.01	0.05	0.02	0.05	0.05	0.01	0.05	0.0	0.01	0.02	0.0	0.03	0.04	0.06	0.0	0.0	0.04	0.03
PAS4_180706_452_A01	0.0	0.0	0.0	0.0	0.0	0.0	0.0	0.0	0.0	0.0	0.0	0.0	0.0	0.0	0.0	0.0	0.0	0.0	0.0	0.0	0.0	0.0	0.0	0.0	0.0	0.0	0.0	0.0	0.0	0.02	0.04	0.04	0.02	0.01	0.05	0.08	0.03	0.0	0.01	0.03	0.0	0.03	0.01	0.07	0.02	0.0	0.0	0.01	0.03
P9S4_180307_403_A01	0.0	0.0	0.0	0.0	0.0	0.0	0.0	0.0	0.0	0.0	0.0	0.0	0.0	0.0	0.0	0.0	0.0	0.0	0.0	0.0	0.0	0.0	0.0	0.0	0.0	0.0	0.0	0.0	0.0	0.0	0.04	0.03	0.03	0.02	0.0	0.04	0.0	0.01	0.0	0.0	0.0	0.0	0.0	0.0	0.03	0.0	0.0	0.0	0.01
PAS4_180706_455_A01	0.0	0.0	0.0	0.0	0.0	0.0	0.0	0.02	0.0	0.0	0.01	0.0	0.05	0.0	0.02	0.0	0.0	0.01	0.01	0.0	0.01	0.0	0.0	0.0	0.0	0.0	0.01	0.0	0.0	0.0	0.0	0.0	0.0	0.0	0.0	0.0	0.0	0.0	0.0	0.0	0.0	0.0	0.0	0.0	0.0	0.0	0.0	0.0	0.0
PAS4_180323_452_A01	0.0	0.0	0.0	0.0	0.0	0.0	0.0	0.0	0.0	0.0	0.0	0.0	0.0	0.0	0.0	0.0	0.0	0.0	0.0	0.0	0.0	0.0	0.0	0.0	0.0	0.0	0.0	0.0	0.0	0.0	0.08	0.0	0.1	0.04	0.01	0.11	0.04	0.03	0.0	0.04	0.0	0.04	0.01	0.04	0.0	0.0	0.0	0.0	0.05
P8S4_180316_352_A01	0.01	0.0	0.02	0.01	0.0	0.0	0.0	0.01	0.0	0.0	0.01	0.04	0.01	0.0	0.0	0.0	0.0	0.0	0.0	0.0	0.0	0.0	0.0	0.0	0.0	0.0	0.0	0.0	0.0	0.0	0.04	0.08	0.02	0.02	0.0	0.12	0.11	0.0	0.0	0.0	0.0	0.0	0.0	0.0	0.0	0.0	0.0	0.0	0.0
P2S4_180730_056_A01	0.0	0.0	0.0	0.0	0.0	0.0	0.0	0.0	0.0	0.0	0.0	0.0	0.0	0.0	0.0	0.0	0.0	0.0	0.0	0.0	0.0	0.0	0.0	0.0	0.0	0.0	0.0	0.0	0.0	0.0	0.09	0.0	0.07	0.07	0.02	0.02	0.0	0.08	0.0	0.0	0.07	0.0	0.07	0.0	0.0	0.03	0.07	0.0	0.03
P1S4_180306_001_A01	0.0	0.0	0.0	0.0	0.0	0.01	0.19	0.13	0.0	0.0	0.0	0.0	0.02	0.0	0.0	0.01	0.0	0.0	0.02	0.04	0.02	0.01	0.0	0.0	0.01	0.02	0.0	0.0	0.0	0.0	0.0	0.0	0.0	0.0	0.02	0.0	0.01	0.0	0.0	0.0	0.0	0.0	0.02	0.0	0.0	0.0	0.0	0.0	0.01
PFS4_190305_702_A01	0.0	0.0	0.0	0.0	0.0	0.0	0.0	0.0	0.0	0.0	0.0	0.0	0.0	0.0	0.0	0.0	0.0	0.0	0.0	0.0	0.0	0.0	0.0	0.0	0.0	0.0	0.0	0.0	0.0	0.0	0.0	0.01	0.0	0.04	0.0	0.01	0.0	0.0	0.0	0.0	0.0	0.0	0.0	0.0	0.01	0.0	0.0	0.0	0.01
P8S4_180418_353_A01	0.0	0.0	0.0	0.0	0.01	0.0	0.01	0.0	0.0	0.0	0.0	0.02	0.0	0.0	0.0	0.0	0.0	0.0	0.0	0.0	0.0	0.0	0.0	0.0	0.0	0.0	0.0	0.0	0.0	0.0	0.0	0.0	0.0	0.0	0.0	0.0	0.0	0.0	0.0	0.0	0.0	0.0	0.0	0.0	0.0	0.0	0.0	0.0	0.0
PES4_180822_652_A01	0.0	0.0	0.0	0.0	0.0	0.0	0.0	0.0	0.0	0.0	0.0	0.0	0.05	0.0	0.0	0.0	0.0	0.0	0.0	0.0	0.0	0.0	0.0	0.0	0.0	0.0	0.02	0.04	0.09	0.0	0.01	0.01	0.01	0.01	0.0	0.0	0.0	0.0	0.0	0.01	0.0	0.0	0.0	0.01	0.01	0.0	0.0	0.0	0.0
P2S4_180730_052_A01	0.05	0.02	0.03	0.0	0.0	0.0	0.02	0.03	0.0	0.0	0.07	0.0	0.09	0.08	0.0	0.01	0.0	0.02	0.0	0.0	0.01	0.0	0.0	0.0	0.0	0.0	0.03	0.01	0.03	0.01	0.04	0.0	0.06	0.01	0.01	0.06	0.02	0.02	0.0	0.0	0.0	0.03	0.01	0.02	0.03	0.01	0.0	0.0	0.01
PAS4_171206_452_A01	0.0	0.0	0.0	0.0	0.0	0.0	0.0	0.0	0.0	0.0	0.0	0.0	0.0	0.0	0.0	0.0	0.0	0.0	0.0	0.0	0.0	0.0	0.0	0.0	0.0	0.0	0.0	0.0	0.0	0.02	0.01	0.02	0.06	0.01	0.07	0.05	0.0	0.02	0.0	0.0	0.06	0.0	0.0	0.03	0.0	0.01	0.0	0.0	0.09
P8S4_180828_360_A01	0.0	0.0	0.0	0.0	0.0	0.0	0.0	0.0	0.0	0.0	0.0	0.0	0.0	0.0	0.0	0.0	0.0	0.0	0.0	0.0	0.0	0.0	0.0	0.0	0.0	0.0	0.0	0.0	0.0	0.11	0.01	0.01	0.04	0.02	0.01	0.04	0.03	0.0	0.0	0.02	0.0	0.0	0.06	0.02	0.01	0.02	0.0	0.03	0.03
P8S4_180202_353_A01	0.0	0.0	0.0	0.0	0.0	0.0	0.0	0.0	0.0	0.0	0.0	0.0	0.0	0.0	0.0	0.0	0.0	0.0	0.0	0.0	0.0	0.0	0.0	0.0	0.0	0.0	0.0	0.0	0.0	0.0	0.03	0.03	0.05	0.01	0.01	0.05	0.06	0.0	0.0	0.0	0.03	0.0	0.08	0.0	0.0	0.1	0.08	0.01	0.0
PBS4_180703_505_A01	0.0	0.0	0.0	0.0	0.0	0.0	0.0	0.0	0.0	0.0	0.0	0.0	0.0	0.0	0.0	0.0	0.0	0.0	0.0	0.0	0.0	0.0	0.0	0.0	0.0	0.0	0.0	0.0	0.0	0.0	0.03	0.0	0.05	0.02	0.02	0.02	0.0	0.02	0.01	0.01	0.02	0.01	0.0	0.03	0.0	0.0	0.0	0.0	0.02
PBS4_180315_501_A01	0.0	0.0	0.0	0.0	0.0	0.0	0.0	0.02	0.0	0.01	0.11	0.0	0.15	0.04	0.0	0.0	0.07	0.0	0.01	0.0	0.02	0.01	0.01	0.0	0.0	0.03	0.05	0.04	0.01	0.02	0.0	0.0	0.0	0.0	0.0	0.0	0.0	0.0	0.0	0.0	0.0	0.0	0.0	0.0	0.0	0.0	0.0	0.0	0.0
P9S4_180627_404_A01	0.0	0.0	0.0	0.0	0.0	0.0	0.0	0.0	0.0	0.0	0.0	0.0	0.0	0.0	0.0	0.0	0.13	0.07	0.0	0.0	0.0	0.06	0.07	0.01	0.0	0.04	0.0	0.0	0.0	0.04	0.01	0.03	0.02	0.01	0.01	0.03	0.0	0.03	0.0	0.0	0.0	0.0	0.0	0.0	0.01	0.0	0.01	0.0	0.02
P9S4_180619_404_A01	0.0	0.0	0.0	0.0	0.0	0.0	0.0	0.0	0.0	0.0	0.0	0.0	0.0	0.0	0.0	0.0	0.0	0.0	0.0	0.0	0.0	0.0	0.0	0.0	0.0	0.0	0.0	0.0	0.0	0.0	0.0	0.11	0.11	0.08	0.11	0.09	0.1	0.0	0.01	0.0	0.0	0.05	0.08	0.0	0.0	0.0	0.0	0.0	0.0
P9S4_180228_402_A01	0.0	0.0	0.0	0.0	0.0	0.0	0.0	0.0	0.0	0.0	0.01	0.0	0.0	0.0	0.0	0.02	0.0	0.0	0.0	0.0	0.01	0.0	0.0	0.0	0.0	0.02	0.0	0.0	0.0	0.0	0.02	0.05	0.05	0.02	0.06	0.06	0.0	0.06	0.0	0.06	0.0	0.02	0.0	0.0	0.0	0.05	0.03	0.0	0.01
PAS4_180131_451_A01	0.0	0.0	0.0	0.0	0.0	0.0	0.0	0.0	0.0	0.0	0.0	0.0	0.0	0.0	0.0	0.0	0.0	0.0	0.0	0.0	0.0	0.0	0.0	0.0	0.0	0.0	0.0	0.0	0.0	0.0	0.0	0.2	0.22	0.11	0.06	0.07	0.0	0.0	0.0	0.0	0.0	0.0	0.0	0.0	0.0	0.0	0.0	0.0	0.0
P9S4_180122_404_A01	0.0	0.0	0.0	0.0	0.0	0.0	0.0	0.0	0.0	0.0	0.0	0.0	0.0	0.0	0.0	0.0	0.0	0.0	0.0	0.0	0.0	0.0	0.0	0.0	0.0	0.0	0.0	0.0	0.0	0.0	0.02	0.0	0.0	0.0	0.0	0.0	0.0	0.09	0.0	0.0	0.08	0.0	0.0	0.05	0.01	0.04	0.13	0.0	0.0
P2S4_180221_052_A01	0.11	0.0	0.0	0.08	0.01	0.12	0.05	0.0	0.0	0.0	0.0	0.0	0.0	0.0	0.0	0.0	0.0	0.0	0.0	0.0	0.0	0.0	0.0	0.0	0.0	0.0	0.0	0.0	0.0	0.12	0.0	0.0	0.0	0.0	0.0	0.0	0.0	0.0	0.0	0.0	0.0	0.0	0.0	0.0	0.0	0.0	0.0	0.0	0.01
P2S4_171031_051_A01	0.0	0.0	0.0	0.0	0.0	0.0	0.0	0.0	0.0	0.0	0.0	0.0	0.0	0.0	0.0	0.0	0.0	0.0	0.0	0.0	0.0	0.0	0.0	0.0	0.0	0.0	0.0	0.0	0.0	0.0	0.0	0.08	0.09	0.06	0.02	0.06	0.0	0.01	0.0	0.01	0.03	0.0	0.07	0.02	0.01	0.09	0.01	0.0	0.07
PBS4_180716_504_A01	0.0	0.0	0.0	0.0	0.0	0.0	0.0	0.0	0.0	0.0	0.0	0.0	0.0	0.0	0.0	0.0	0.0	0.0	0.0	0.0	0.0	0.0	0.0	0.0	0.0	0.0	0.0	0.0	0.0	0.0	0.01	0.02	0.03	0.01	0.04	0.06	0.01	0.0	0.02	0.02	0.02	0.0	0.03	0.05	0.03	0.0	0.0	0.0	0.05
P2S4_171018_051_A01	0.0	0.0	0.0	0.0	0.0	0.0	0.0	0.0	0.0	0.0	0.0	0.0	0.0	0.0	0.0	0.0	0.0	0.0	0.0	0.0	0.0	0.0	0.0	0.0	0.0	0.0	0.0	0.0	0.0	0.0	0.01	0.02	0.09	0.05	0.03	0.04	0.0	0.15	0.0	0.08	0.0	0.05	0.0	0.03	0.06	0.0	0.06	0.0	0.0
P1S4_190411_001_A01	0.0	0.0	0.0	0.0	0.0	0.0	0.0	0.0	0.0	0.0	0.0	0.0	0.0	0.0	0.0	0.0	0.0	0.0	0.0	0.0	0.0	0.0	0.0	0.0	0.0	0.0	0.0	0.0	0.0	0.0	0.04	0.0	0.03	0.0	0.08	0.08	0.05	0.05	0.0	0.04	0.0	0.0	0.08	0.02	0.0	0.0	0.0	0.0	0.03
PAS4_180315_453_A01	0.17	0.01	0.0	0.01	0.0	0.0	0.0	0.0	0.0	0.0	0.07	0.0	0.0	0.0	0.0	0.01	0.0	0.0	0.01	0.0	0.0	0.0	0.0	0.0	0.0	0.0	0.04	0.01	0.02	0.0	0.0	0.0	0.0	0.0	0.0	0.0	0.0	0.0	0.0	0.0	0.0	0.0	0.0	0.0	0.0	0.0	0.0	0.0	0.0
PAS4_180418_452_A01	0.0	0.0	0.0	0.0	0.0	0.0	0.0	0.0	0.0	0.0	0.0	0.0	0.0	0.0	0.0	0.0	0.0	0.0	0.0	0.0	0.0	0.0	0.0	0.0	0.0	0.0	0.0	0.0	0.0	0.0	0.0	0.0	0.0	0.0	0.0	0.0	0.0	0.0	0.0	0.0	0.0	0.0	0.0	0.0	0.0	0.0	0.0	0.0	0.0
P1S4_180911_001_A01	0.0	0.0	0.0	0.0	0.0	0.0	0.0	0.0	0.0	0.0	0.0	0.0	0.0	0.0	0.0	0.0	0.0	0.0	0.0	0.0	0.0	0.0	0.0	0.0	0.0	0.0	0.0	0.0	0.0	0.0	0.03	0.01	0.0	0.01	0.03	0.03	0.02	0.0	0.03	0.05	0.0	0.0	0.04	0.05	0.03	0.0	0.0	0.05	0.0
P8S4_180404_357_A01	0.0	0.0	0.0	0.0	0.0	0.01	0.0	0.0	0.0	0.0	0.0	0.0	0.0	0.0	0.0	0.0	0.0	0.0	0.0	0.0	0.01	0.0	0.0	0.0	0.0	0.0	0.0	0.0	0.0	0.0	0.0	0.0	0.0	0.0	0.0	0.0	0.0	0.0	0.0	0.0	0.0	0.0	0.0	0.0	0.0	0.0	0.0	0.0	0.0
P2S4_180731_053_A01	0.0	0.0	0.0	0.02	0.02	0.03	0.0	0.02	0.0	0.0	0.04	0.0	0.0	0.0	0.02	0.0	0.0	0.0	0.0	0.0	0.0	0.0	0.0	0.0	0.0	0.0	0.0	0.01	0.08	0.0	0.04	0.0	0.05	0.0	0.04	0.06	0.01	0.03	0.03	0.03	0.01	0.0	0.03	0.0	0.0	0.0	0.03	0.0	0.03
P8S4_180314_355_A01	0.0	0.0	0.0	0.0	0.0	0.0	0.0	0.0	0.0	0.0	0.06	0.0	0.1	0.01	0.0	0.02	0.01	0.02	0.01	0.0	0.0	0.01	0.0	0.04	0.02	0.01	0.0	0.01	0.0	0.0	0.0	0.03	0.06	0.01	0.02	0.06	0.0	0.09	0.0	0.06	0.01	0.0	0.07	0.03	0.02	0.0	0.06	0.0	0.0
P2S4_180228_054_A01	0.04	0.0	0.01	0.01	0.0	0.09	0.01	0.0	0.0	0.0	0.04	0.07	0.03	0.0	0.0	0.0	0.0	0.0	0.0	0.0	0.0	0.0	0.0	0.0	0.0	0.0	0.0	0.0	0.0	0.03	0.01	0.0	0.0	0.01	0.01	0.01	0.03	0.0	0.01	0.02	0.01	0.02	0.01	0.02	0.0	0.0	0.0	0.0	0.01
P2S4_180706_053_A01	0.0	0.0	0.0	0.0	0.0	0.0	0.0	0.02	0.0	0.0	0.03	0.0	0.0	0.0	0.01	0.0	0.02	0.03	0.0	0.0	0.0	0.0	0.0	0.0	0.0	0.01	0.0	0.0	0.0	0.01	0.02	0.05	0.05	0.05	0.02	0.04	0.02	0.02	0.01	0.02	0.01	0.0	0.06	0.02	0.0	0.02	0.02	0.03	0.02
PBS4_181113_502_A01	0.0	0.01	0.0	0.0	0.0	0.0	0.0	0.0	0.0	0.0	0.01	0.0	0.0	0.01	0.01	0.0	0.0	0.0	0.0	0.0	0.0	0.0	0.0	0.0	0.0	0.02	0.0	0.0	0.0	0.04	0.07	0.02	0.11	0.06	0.01	0.06	0.03	0.03	0.0	0.04	0.0	0.01	0.03	0.01	0.02	0.05	0.05	0.0	0.0
PAS4_190627_454_A01	0.02	0.02	0.02	0.03	0.0	0.0	0.0	0.0	0.0	0.0	0.0	0.0	0.1	0.0	0.09	0.01	0.0	0.0	0.0	0.0	0.0	0.0	0.03	0.0	0.0	0.01	0.0	0.0	0.0	0.0	0.0	0.03	0.04	0.01	0.01	0.04	0.01	0.0	0.0	0.01	0.0	0.0	0.04	0.0	0.0	0.0	0.0	0.0	0.0
PXS4_180717_903_A01	0.08	0.0	0.0	0.0	0.0	0.01	0.08	0.0	0.02	0.0	0.09	0.0	0.09	0.0	0.1	0.0	0.0	0.0	0.0	0.01	0.0	0.0	0.0	0.0	0.0	0.01	0.0	0.01	0.0	0.0	0.0	0.0	0.04	0.0	0.02	0.02	0.0	0.0	0.0	0.0	0.02	0.0	0.03	0.0	0.0	0.01	0.03	0.01	0.01
PBS4_180906_505_A01	0.09	0.01	0.03	0.0	0.0	0.0	0.0	0.0	0.0	0.0	0.08	0.04	0.02	0.02	0.07	0.0	0.02	0.0	0.03	0.0	0.0	0.0	0.0	0.0	0.0	0.0	0.01	0.0	0.1	0.0	0.03	0.0	0.03	0.0	0.05	0.02	0.0	0.01	0.0	0.05	0.0	0.03	0.02	0.02	0.0	0.01	0.0	0.0	0.02
PAS4_180822_456_A01	0.0	0.0	0.0	0.0	0.0	0.0	0.0	0.02	0.0	0.0	0.13	0.0	0.16	0.0	0.03	0.0	0.0	0.0	0.0	0.01	0.0	0.0	0.0	0.02	0.0	0.01	0.0	0.03	0.0	0.0	0.0	0.0	0.0	0.01	0.0	0.0	0.0	0.0	0.0	0.0	0.0	0.0	0.01	0.0	0.0	0.0	0.0	0.0	0.0
PAS4_180716_451_A01	0.1	0.05	0.03	0.0	0.06	0.06	0.0	0.0	0.0	0.0	0.01	0.0	0.05	0.0	0.02	0.0	0.0	0.0	0.0	0.01	0.0	0.01	0.01	0.0	0.0	0.0	0.0	0.0	0.0	0.0	0.06	0.0	0.06	0.0	0.06	0.0	0.0	0.0	0.0	0.0	0.0	0.0	0.0	0.04	0.03	0.0	0.0	0.0	0.04
PAS4_180319_451_A01	0.0	0.0	0.02	0.02	0.0	0.0	0.0	0.0	0.0	0.0	0.06	0.12	0.0	0.0	0.0	0.06	0.02	0.0	0.0	0.0	0.0	0.03	0.02	0.02	0.0	0.0	0.0	0.0	0.0	0.0	0.02	0.01	0.03	0.02	0.0	0.02	0.0	0.01	0.0	0.0	0.0	0.0	0.0	0.01	0.0	0.0	0.0	0.02	0.02
PAS4_180720_453_A01	0.13	0.0	0.0	0.0	0.0	0.0	0.0	0.0	0.0	0.01	0.1	0.0	0.01	0.06	0.01	0.0	0.0	0.0	0.01	0.0	0.0	0.0	0.01	0.0	0.0	0.02	0.0	0.0	0.01	0.0	0.0	0.0	0.01	0.0	0.0	0.0	0.0	0.0	0.0	0.0	0.0	0.0	0.0	0.0	0.0	0.0	0.0	0.0	0.0
PBS4_180418_503_A01	0.02	0.0	0.0	0.2	0.01	0.0	0.0	0.0	0.0	0.0	0.0	0.0	0.0	0.01	0.03	0.0	0.0	0.0	0.0	0.0	0.0	0.06	0.0	0.08	0.01	0.03	0.0	0.0	0.01	0.0	0.01	0.02	0.01	0.01	0.02	0.07	0.0	0.03	0.0	0.0	0.0	0.0	0.02	0.01	0.02	0.0	0.0	0.02	0.0
P1S4_190328_002_A01	0.0	0.0	0.0	0.0	0.0	0.0	0.0	0.0	0.0	0.0	0.0	0.0	0.0	0.0	0.0	0.0	0.0	0.0	0.0	0.0	0.0	0.0	0.0	0.0	0.0	0.0	0.0	0.0	0.0	0.0	0.07	0.02	0.09	0.01	0.06	0.09	0.07	0.0	0.0	0.0	0.05	0.0	0.09	0.02	0.04	0.01	0.0	0.04	0.0
PBS4_171027_503_A01	0.0	0.0	0.0	0.0	0.0	0.0	0.0	0.0	0.0	0.0	0.0	0.0	0.0	0.0	0.0	0.0	0.0	0.0	0.0	0.0	0.0	0.0	0.0	0.0	0.0	0.0	0.0	0.0	0.0	0.0	0.01	0.03	0.04	0.02	0.03	0.02	0.0	0.01	0.0	0.01	0.0	0.0	0.01	0.03	0.0	0.0	0.02	0.02	0.0
PES4_180817_652_A01	0.0	0.0	0.0	0.0	0.0	0.0	0.0	0.0	0.0	0.0	0.0	0.09	0.04	0.08	0.0	0.01	0.0	0.0	0.0	0.06	0.01	0.0	0.0	0.0	0.03	0.0	0.0	0.02	0.0	0.0	0.03	0.01	0.07	0.02	0.06	0.03	0.03	0.01	0.0	0.04	0.0	0.0	0.0	0.02	0.02	0.0	0.0	0.03	0.0
P9S4_171206_402_A01	0.02	0.0	0.0	0.0	0.01	0.0	0.0	0.02	0.0	0.0	0.05	0.0	0.13	0.01	0.02	0.01	0.0	0.0	0.05	0.0	0.0	0.01	0.0	0.0	0.0	0.0	0.17	0.0	0.0	0.0	0.0	0.0	0.0	0.0	0.0	0.0	0.0	0.0	0.0	0.0	0.0	0.0	0.0	0.0	0.0	0.0	0.0	0.0	0.0
PAS4_171208_451_A01	0.0	0.0	0.0	0.0	0.0	0.03	0.02	0.0	0.02	0.02	0.0	0.0	0.09	0.0	0.04	0.0	0.01	0.0	0.0	0.0	0.0	0.0	0.0	0.0	0.0	0.01	0.0	0.01	0.04	0.0	0.0	0.0	0.0	0.0	0.0	0.0	0.0	0.0	0.0	0.0	0.0	0.0	0.0	0.02	0.0	0.0	0.0	0.0	0.0
PBS4_180601_506_A01	0.0	0.0	0.0	0.0	0.0	0.0	0.0	0.0	0.0	0.0	0.0	0.0	0.0	0.0	0.0	0.0	0.0	0.0	0.0	0.0	0.0	0.0	0.0	0.0	0.0	0.0	0.0	0.0	0.0	0.0	0.0	0.0	0.0	0.0	0.0	0.0	0.01	0.0	0.0	0.0	0.08	0.0	0.0	0.02	0.05	0.0	0.0	0.12	0.05
P9S4_180110_401_A01	0.0	0.0	0.0	0.0	0.0	0.0	0.0	0.0	0.0	0.0	0.0	0.0	0.0	0.0	0.0	0.0	0.0	0.0	0.0	0.0	0.0	0.0	0.0	0.0	0.0	0.0	0.0	0.0	0.0	0.0	0.02	0.05	0.05	0.05	0.05	0.09	0.04	0.04	0.0	0.05	0.0	0.0	0.06	0.04	0.02	0.01	0.1	0.0	0.0
PAS4_190409_454_A01	0.0	0.0	0.0	0.0	0.0	0.0	0.0	0.0	0.0	0.0	0.0	0.0	0.0	0.0	0.0	0.0	0.0	0.0	0.0	0.0	0.0	0.0	0.0	0.0	0.0	0.0	0.0	0.0	0.0	0.0	0.0	0.16	0.07	0.0	0.0	0.0	0.0	0.01	0.0	0.0	0.0	0.0	0.0	0.01	0.01	0.12	0.0	0.13	0.01
PBS4_180403_505_A01	0.0	0.0	0.0	0.0	0.0	0.0	0.0	0.0	0.0	0.0	0.0	0.0	0.0	0.0	0.0	0.0	0.0	0.0	0.0	0.0	0.0	0.0	0.0	0.0	0.0	0.0	0.0	0.0	0.0	0.0	0.0	0.05	0.05	0.04	0.0	0.0	0.0	0.05	0.0	0.0	0.0	0.0	0.0	0.0	0.0	0.0	0.0	0.0	0.01
P2S4_180731_054_A01	0.0	0.0	0.0	0.0	0.0	0.0	0.0	0.0	0.0	0.0	0.0	0.0	0.0	0.0	0.0	0.0	0.0	0.0	0.0	0.0	0.0	0.0	0.0	0.0	0.0	0.0	0.0	0.0	0.0	0.06	0.05	0.0	0.02	0.02	0.02	0.0	0.02	0.05	0.0	0.0	0.07	0.0	0.05	0.03	0.06	0.01	0.0	0.0	0.07
P1S4_180716_005_A01	0.0	0.0	0.0	0.0	0.0	0.0	0.0	0.0	0.0	0.0	0.0	0.0	0.0	0.0	0.0	0.0	0.0	0.0	0.0	0.0	0.0	0.0	0.0	0.0	0.0	0.0	0.0	0.0	0.0	0.0	0.0	0.0	0.0	0.0	0.0	0.0	0.0	0.0	0.0	0.0	0.0	0.0	0.0	0.0	0.0	0.0	0.0	0.0	0.0
PBS4_180425_502_A01	0.01	0.0	0.0	0.0	0.0	0.0	0.0	0.0	0.0	0.0	0.0	0.0	0.0	0.0	0.0	0.0	0.0	0.0	0.0	0.0	0.0	0.0	0.0	0.0	0.0	0.0	0.0	0.0	0.0	0.0	0.0	0.0	0.0	0.0	0.0	0.0	0.0	0.0	0.0	0.0	0.0	0.0	0.0	0.0	0.0	0.0	0.0	0.0	0.0
P1S4_180313_002_A01	0.01	0.0	0.0	0.0	0.0	0.0	0.04	0.0	0.0	0.0	0.01	0.06	0.01	0.0	0.0	0.0	0.0	0.0	0.0	0.0	0.0	0.0	0.0	0.0	0.0	0.0	0.01	0.01	0.03	0.0	0.07	0.0	0.04	0.01	0.06	0.1	0.0	0.03	0.0	0.02	0.04	0.02	0.05	0.03	0.07	0.0	0.08	0.0	0.0
P1S4_180411_003_A01	0.0	0.02	0.0	0.02	0.0	0.0	0.0	0.02	0.0	0.0	0.0	0.0	0.0	0.0	0.02	0.01	0.0	0.0	0.0	0.0	0.0	0.0	0.0	0.0	0.0	0.02	0.0	0.0	0.0	0.0	0.11	0.04	0.09	0.02	0.01	0.12	0.03	0.04	0.01	0.0	0.02	0.0	0.06	0.02	0.06	0.02	0.0	0.0	0.11
PBS4_180524_507_A01	0.0	0.0	0.0	0.0	0.0	0.01	0.01	0.0	0.0	0.03	0.02	0.0	0.02	0.0	0.0	0.03	0.0	0.0	0.01	0.02	0.0	0.0	0.0	0.0	0.0	0.0	0.02	0.04	0.05	0.0	0.08	0.0	0.07	0.02	0.06	0.08	0.02	0.04	0.0	0.03	0.0	0.0	0.08	0.07	0.0	0.0	0.0	0.02	0.02
P8S4_180122_352_A01	0.03	0.0	0.0	0.0	0.0	0.0	0.0	0.01	0.0	0.0	0.01	0.01	0.0	0.0	0.01	0.02	0.0	0.0	0.0	0.0	0.0	0.01	0.0	0.0	0.0	0.0	0.0	0.01	0.01	0.0	0.06	0.0	0.07	0.0	0.04	0.12	0.05	0.0	0.0	0.0	0.13	0.0	0.04	0.05	0.05	0.02	0.0	0.09	0.0
P1S4_180320_003_A01	0.18	0.0	0.05	0.02	0.06	0.0	0.0	0.01	0.0	0.0	0.07	0.09	0.0	0.0	0.0	0.0	0.0	0.0	0.0	0.0	0.0	0.0	0.0	0.0	0.0	0.0	0.0	0.0	0.0	0.02	0.02	0.02	0.02	0.02	0.03	0.02	0.05	0.0	0.0	0.0	0.02	0.01	0.02	0.01	0.0	0.03	0.0	0.02	0.01
PBS4_180501_502_A01	0.0	0.0	0.0	0.0	0.0	0.0	0.0	0.0	0.0	0.0	0.0	0.0	0.0	0.0	0.0	0.0	0.0	0.0	0.0	0.0	0.0	0.0	0.0	0.0	0.0	0.0	0.0	0.0	0.0	0.0	0.01	0.02	0.03	0.02	0.0	0.05	0.02	0.0	0.01	0.0	0.02	0.0	0.06	0.0	0.02	0.0	0.01	0.0	0.02
PAS4_181008_452_A01	0.0	0.0	0.0	0.0	0.0	0.0	0.0	0.0	0.0	0.0	0.0	0.0	0.0	0.0	0.0	0.0	0.0	0.0	0.0	0.0	0.0	0.0	0.0	0.0	0.0	0.0	0.0	0.0	0.0	0.0	0.02	0.0	0.06	0.02	0.01	0.07	0.0	0.02	0.01	0.01	0.03	0.0	0.03	0.0	0.0	0.03	0.0	0.0	0.06
P8S4_180307_354_A01	0.0	0.0	0.0	0.0	0.0	0.0	0.0	0.02	0.0	0.0	0.05	0.0	0.16	0.0	0.0	0.0	0.0	0.0	0.0	0.0	0.01	0.0	0.0	0.0	0.0	0.0	0.0	0.0	0.01	0.0	0.01	0.0	0.03	0.0	0.08	0.01	0.05	0.0	0.0	0.04	0.02	0.01	0.01	0.0	0.0	0.0	0.03	0.0	0.04
P1S4_180910_001_A01	0.0	0.0	0.0	0.0	0.0	0.0	0.0	0.0	0.0	0.0	0.0	0.0	0.0	0.0	0.0	0.0	0.0	0.0	0.0	0.0	0.0	0.0	0.0	0.0	0.0	0.0	0.0	0.0	0.0	0.0	0.0	0.0	0.04	0.01	0.02	0.03	0.03	0.0	0.0	0.01	0.0	0.0	0.04	0.02	0.0	0.0	0.0	0.0	0.02
P1S4_180821_006_A01	0.0	0.0	0.0	0.0	0.0	0.0	0.0	0.0	0.0	0.0	0.0	0.0	0.0	0.0	0.01	0.0	0.0	0.0	0.0	0.0	0.0	0.0	0.0	0.0	0.0	0.0	0.0	0.0	0.0	0.0	0.0	0.0	0.0	0.0	0.0	0.0	0.02	0.01	0.02	0.0	0.0	0.0	0.0	0.0	0.0	0.0	0.24	0.0	0.3
PES4_180914_651_A01	0.0	0.0	0.0	0.0	0.0	0.0	0.0	0.0	0.0	0.0	0.0	0.0	0.0	0.0	0.0	0.0	0.0	0.0	0.0	0.0	0.0	0.0	0.0	0.0	0.0	0.0	0.0	0.0	0.0	0.0	0.0	0.0	0.0	0.0	0.0	0.0	0.0	0.01	0.0	0.0	0.03	0.0	0.0	0.0	0.0	0.04	0.0	0.0	0.03
P8S4_180424_354_A01	0.0	0.0	0.0	0.0	0.0	0.0	0.0	0.0	0.0	0.0	0.0	0.0	0.0	0.0	0.0	0.0	0.0	0.0	0.0	0.0	0.0	0.0	0.0	0.0	0.0	0.0	0.0	0.0	0.0	0.0	0.18	0.0	0.01	0.0	0.0	0.14	0.11	0.03	0.0	0.0	0.0	0.0	0.0	0.07	0.07	0.07	0.0	0.0	0.19
P9S4_180122_401_A01	0.01	0.0	0.0	0.0	0.0	0.0	0.0	0.0	0.0	0.0	0.02	0.0	0.01	0.0	0.0	0.01	0.0	0.0	0.0	0.0	0.0	0.0	0.0	0.0	0.0	0.01	0.0	0.0	0.0	0.0	0.1	0.01	0.14	0.03	0.11	0.0	0.0	0.0	0.0	0.0	0.0	0.0	0.0	0.0	0.07	0.0	0.0	0.0	0.31
P2S4_180307_053_A01	0.0	0.0	0.0	0.0	0.0	0.0	0.0	0.0	0.0	0.0	0.0	0.0	0.0	0.0	0.0	0.0	0.0	0.0	0.0	0.0	0.0	0.0	0.0	0.0	0.0	0.0	0.0	0.0	0.0	0.25	0.0	0.0	0.02	0.0	0.0	0.0	0.0	0.0	0.0	0.0	0.0	0.0	0.0	0.0	0.0	0.0	0.02	0.0	0.41
P9S4_180228_404_A01	0.0	0.0	0.0	0.0	0.0	0.0	0.0	0.0	0.0	0.0	0.0	0.0	0.0	0.0	0.0	0.0	0.0	0.0	0.0	0.0	0.0	0.0	0.0	0.0	0.0	0.0	0.0	0.0	0.0	0.0	0.01	0.0	0.0	0.0	0.0	0.0	0.0	0.0	0.0	0.0	0.0	0.0	0.0	0.0	0.0	0.0	0.27	0.0	0.72
P2S4_180427_054_A01	0.0	0.0	0.0	0.0	0.0	0.0	0.0	0.0	0.0	0.0	0.0	0.0	0.0	0.0	0.0	0.0	0.0	0.0	0.0	0.0	0.0	0.0	0.0	0.0	0.0	0.0	0.0	0.0	0.0	0.0	0.0	0.0	0.0	0.0	0.0	0.0	0.0	0.0	0.0	0.0	0.0	0.0	0.0	0.0	0.0	0.0	0.13	0.07	0.8
P2S4_180807_051_A01	0.0	0.0	0.0	0.0	0.0	0.0	0.0	0.0	0.0	0.0	0.0	0.0	0.0	0.0	0.0	0.0	0.0	0.0	0.0	0.0	0.0	0.0	0.0	0.0	0.0	0.0	0.0	0.0	0.0	0.0	0.0	0.0	0.0	0.0	0.0	0.12	0.15	0.0	0.03	0.12	0.02	0.19	0.0	0.05	0.03	0.0	0.02	0.25	0.0
P1S4_180314_002_A01	0.0	0.0	0.0	0.0	0.0	0.0	0.0	0.0	0.0	0.0	0.0	0.0	0.0	0.0	0.0	0.0	0.0	0.0	0.0	0.0	0.0	0.0	0.0	0.0	0.0	0.0	0.0	0.0	0.0	0.0	0.0	0.0	0.0	0.0	0.0	0.0	0.0	0.0	0.07	0.0	0.0	0.0	0.0	0.04	0.06	0.1	0.22	0.29	0.22
P8S4_180319_351_A01	0.0	0.0	0.0	0.0	0.0	0.0	0.0	0.0	0.0	0.0	0.0	0.0	0.0	0.0	0.0	0.0	0.0	0.0	0.0	0.0	0.0	0.0	0.0	0.0	0.0	0.0	0.0	0.0	0.0	0.0	0.0	0.0	0.0	0.0	0.0	0.0	0.0	0.0	0.0	0.0	0.0	0.0	0.0	0.0	0.0	0.0	0.17	0.56	0.06
PAS4_180612_452_A01	0.0	0.0	0.0	0.0	0.0	0.0	0.0	0.0	0.0	0.0	0.0	0.0	0.0	0.0	0.0	0.0	0.0	0.0	0.0	0.0	0.0	0.0	0.0	0.0	0.0	0.0	0.0	0.0	0.0	0.0	0.0	0.0	0.0	0.0	0.0	0.0	0.0	0.0	0.0	0.0	0.0	0.0	0.0	0.0	0.0	0.0	0.15	0.85	0.0
P9S4_171003_403_A01	0.0	0.0	0.0	0.0	0.0	0.0	0.0	0.0	0.0	0.0	0.0	0.0	0.0	0.0	0.0	0.0	0.0	0.0	0.0	0.0	0.0	0.0	0.0	0.0	0.0	0.0	0.0	0.0	0.0	0.0	0.0	0.0	0.0	0.0	0.0	0.0	0.0	0.0	0.0	0.0	0.0	0.0	0.0	0.0	0.0	0.0	0.03	0.97	0.0
P8S4_180406_352_A01	0.09	0.0	0.0	0.0	0.0	0.0	0.02	0.01	0.0	0.0	0.07	0.0	0.0	0.0	0.0	0.0	0.0	0.0	0.0	0.0	0.0	0.0	0.0	0.0	0.0	0.0	0.0	0.0	0.0	0.01	0.06	0.0	0.08	0.1	0.0	0.05	0.08	0.0	0.01	0.03	0.01	0.0	0.06	0.02	0.01	0.05	0.12	0.0	0.0
PAS4_180604_451_A01	0.0	0.0	0.0	0.0	0.0	0.0	0.0	0.0	0.0	0.0	0.0	0.0	0.0	0.0	0.0	0.0	0.0	0.0	0.0	0.0	0.0	0.0	0.0	0.0	0.0	0.0	0.0	0.0	0.0	0.0	0.04	0.01	0.01	0.0	0.0	0.0	0.09	0.0	0.01	0.0	0.02	0.0	0.01	0.0	0.0	0.0	0.26	0.14	0.17
P1S4_180205_002_A01	0.0	0.0	0.0	0.0	0.0	0.0	0.0	0.0	0.0	0.0	0.0	0.0	0.0	0.0	0.0	0.0	0.0	0.0	0.0	0.0	0.0	0.0	0.0	0.0	0.0	0.0	0.0	0.0	0.0	0.0	0.0	0.0	0.0	0.0	0.0	0.0	0.0	0.0	0.0	0.0	0.0	0.0	0.0	0.0	0.0	0.0	0.59	0.0	0.33
P2S4_171018_056_A01	0.0	0.0	0.0	0.0	0.0	0.0	0.0	0.0	0.0	0.0	0.0	0.0	0.0	0.0	0.0	0.0	0.0	0.0	0.0	0.0	0.0	0.0	0.0	0.0	0.0	0.0	0.0	0.0	0.0	0.0	0.0	0.0	0.0	0.0	0.0	0.0	0.0	0.0	0.0	0.0	0.0	0.0	0.0	0.0	0.01	0.03	0.76	0.0	0.13
P8S4_180307_357_A01	0.0	0.0	0.0	0.0	0.0	0.0	0.0	0.0	0.0	0.0	0.0	0.0	0.0	0.0	0.0	0.0	0.0	0.0	0.0	0.0	0.0	0.0	0.0	0.0	0.0	0.0	0.0	0.0	0.0	0.0	0.0	0.0	0.0	0.0	0.0	0.0	0.0	0.0	0.0	0.0	0.0	0.0	0.0	0.0	0.0	0.0	0.77	0.23	0.0
P1S4_180605_001_A01	0.0	0.0	0.0	0.0	0.0	0.0	0.0	0.0	0.0	0.0	0.0	0.0	0.0	0.0	0.0	0.0	0.0	0.0	0.0	0.0	0.0	0.0	0.0	0.0	0.0	0.0	0.0	0.0	0.0	0.0	0.0	0.0	0.0	0.0	0.0	0.0	0.0	0.0	0.0	0.0	0.0	0.0	0.0	0.0	0.0	0.0	0.78	0.0	0.22
PBS4_180202_501_A01	0.0	0.0	0.0	0.0	0.0	0.0	0.0	0.0	0.0	0.0	0.0	0.0	0.0	0.0	0.0	0.0	0.0	0.0	0.0	0.0	0.0	0.0	0.0	0.0	0.0	0.0	0.0	0.0	0.0	0.0	0.01	0.06	0.08	0.01	0.08	0.1	0.1	0.0	0.0	0.06	0.0	0.0	0.11	0.0	0.0	0.15	0.0	0.0	0.03
PES4_190212_652_A01	0.0	0.0	0.0	0.0	0.0	0.0	0.0	0.0	0.0	0.0	0.0	0.0	0.0	0.0	0.0	0.0	0.0	0.0	0.0	0.0	0.0	0.0	0.0	0.0	0.0	0.0	0.0	0.0	0.0	0.0	0.0	0.0	0.0	0.0	0.0	0.16	0.06	0.01	0.38	0.0	0.0	0.0	0.0	0.0	0.0	0.39	0.0	0.0	0.0
P8S4_180830_354_A01	0.03	0.03	0.0	0.0	0.0	0.0	0.0	0.02	0.0	0.0	0.04	0.02	0.03	0.01	0.0	0.01	0.0	0.0	0.0	0.0	0.0	0.0	0.02	0.0	0.0	0.0	0.0	0.0	0.0	0.01	0.1	0.0	0.09	0.05	0.09	0.01	0.0	0.0	0.0	0.0	0.0	0.0	0.08	0.14	0.0	0.0	0.0	0.02	0.0
P1S4_180912_010_A01	0.06	0.0	0.01	0.04	0.0	0.0	0.0	0.0	0.0	0.0	0.07	0.07	0.0	0.0	0.0	0.0	0.0	0.0	0.0	0.0	0.0	0.0	0.0	0.0	0.0	0.0	0.0	0.0	0.0	0.0	0.06	0.01	0.06	0.09	0.0	0.07	0.11	0.0	0.01	0.0	0.07	0.0	0.13	0.04	0.02	0.03	0.05	0.0	0.0
P1S4_180914_002_A01	0.0	0.0	0.0	0.11	0.0	0.0	0.0	0.0	0.0	0.0	0.02	0.0	0.0	0.0	0.0	0.0	0.0	0.0	0.0	0.0	0.0	0.0	0.0	0.0	0.0	0.0	0.0	0.0	0.0	0.0	0.05	0.13	0.1	0.01	0.1	0.13	0.03	0.03	0.0	0.02	0.06	0.0	0.16	0.01	0.04	0.0	0.0	0.0	0.0
P9S4_180316_402_A01	0.0	0.0	0.0	0.0	0.0	0.0	0.0	0.0	0.0	0.0	0.0	0.0	0.0	0.0	0.0	0.0	0.0	0.0	0.0	0.0	0.0	0.0	0.0	0.0	0.0	0.0	0.0	0.0	0.0	0.0	0.14	0.0	0.13	0.04	0.02	0.09	0.04	0.0	0.0	0.06	0.07	0.0	0.16	0.05	0.08	0.0	0.0	0.1	0.0
P2S4_171003_056_A01	0.0	0.0	0.0	0.0	0.0	0.0	0.0	0.0	0.0	0.0	0.0	0.0	0.0	0.0	0.0	0.0	0.0	0.0	0.0	0.0	0.0	0.0	0.0	0.0	0.0	0.0	0.0	0.0	0.0	0.0	0.0	0.12	0.1	0.15	0.06	0.13	0.0	0.08	0.0	0.09	0.0	0.02	0.17	0.04	0.02	0.02	0.0	0.0	0.0
P1S4_180530_002_A01	0.01	0.0	0.0	0.0	0.0	0.01	0.0	0.0	0.0	0.0	0.0	0.0	0.02	0.02	0.0	0.0	0.0	0.0	0.0	0.0	0.0	0.0	0.0	0.01	0.0	0.0	0.0	0.0	0.02	0.0	0.1	0.06	0.03	0.03	0.07	0.08	0.07	0.0	0.07	0.0	0.0	0.01	0.19	0.14	0.05	0.01	0.0	0.0	0.0
P1S4_180417_003_A01	0.0	0.0	0.03	0.01	0.0	0.01	0.0	0.0	0.0	0.0	0.0	0.0	0.0	0.0	0.0	0.0	0.0	0.0	0.0	0.0	0.0	0.0	0.0	0.0	0.0	0.0	0.0	0.0	0.0	0.0	0.02	0.01	0.0	0.09	0.03	0.0	0.03	0.0	0.0	0.17	0.03	0.0	0.21	0.18	0.05	0.0	0.01	0.0	0.11
P2S4_180716_051_A01	0.0	0.0	0.0	0.0	0.0	0.0	0.0	0.0	0.0	0.0	0.0	0.0	0.0	0.0	0.0	0.0	0.0	0.0	0.0	0.0	0.0	0.0	0.0	0.0	0.0	0.0	0.0	0.0	0.0	0.0	0.04	0.0	0.0	0.05	0.06	0.06	0.0	0.0	0.0	0.11	0.01	0.0	0.23	0.07	0.1	0.0	0.0	0.0	0.16
P8S4_180118_352_A01	0.0	0.0	0.0	0.0	0.0	0.0	0.0	0.0	0.0	0.0	0.0	0.0	0.0	0.0	0.0	0.0	0.0	0.0	0.0	0.0	0.0	0.0	0.0	0.0	0.0	0.0	0.0	0.0	0.0	0.0	0.23	0.0	0.0	0.0	0.0	0.0	0.0	0.0	0.0	0.0	0.24	0.02	0.25	0.18	0.03	0.01	0.01	0.03	0.0
P2S4_190618_051_A01	0.0	0.0	0.0	0.0	0.0	0.0	0.0	0.0	0.0	0.0	0.0	0.0	0.0	0.0	0.0	0.0	0.0	0.0	0.0	0.0	0.0	0.0	0.0	0.0	0.0	0.0	0.0	0.0	0.0	0.0	0.19	0.0	0.0	0.12	0.17	0.0	0.0	0.0	0.0	0.0	0.0	0.0	0.26	0.22	0.04	0.0	0.0	0.0	0.0
PAS4_180227_451_A01	0.0	0.0	0.0	0.0	0.01	0.01	0.0	0.0	0.0	0.0	0.0	0.0	0.0	0.06	0.0	0.02	0.0	0.0	0.0	0.0	0.0	0.0	0.0	0.0	0.0	0.01	0.0	0.0	0.0	0.02	0.0	0.0	0.01	0.0	0.06	0.0	0.0	0.0	0.0	0.18	0.05	0.03	0.28	0.0	0.0	0.0	0.26	0.0	0.0
P2S4_180618_055_A01	0.0	0.0	0.0	0.0	0.0	0.0	0.0	0.0	0.0	0.0	0.0	0.0	0.0	0.0	0.0	0.0	0.0	0.0	0.0	0.0	0.0	0.0	0.0	0.0	0.0	0.0	0.0	0.0	0.0	0.0	0.07	0.0	0.0	0.02	0.13	0.0	0.14	0.0	0.0	0.04	0.15	0.0	0.28	0.05	0.07	0.05	0.0	0.0	0.0
P1S4_180906_003_A01	0.0	0.0	0.0	0.0	0.0	0.0	0.0	0.0	0.0	0.0	0.0	0.0	0.0	0.0	0.0	0.0	0.0	0.0	0.0	0.0	0.0	0.0	0.0	0.0	0.0	0.0	0.0	0.0	0.0	0.0	0.03	0.0	0.0	0.05	0.1	0.14	0.19	0.0	0.0	0.03	0.0	0.0	0.45	0.0	0.01	0.0	0.0	0.0	0.0
PBS4_180912_503_A01	0.0	0.0	0.0	0.0	0.0	0.0	0.0	0.0	0.0	0.0	0.0	0.0	0.0	0.0	0.0	0.0	0.0	0.0	0.0	0.0	0.0	0.0	0.0	0.0	0.0	0.0	0.0	0.0	0.0	0.0	0.0	0.0	0.0	0.25	0.28	0.02	0.0	0.0	0.0	0.0	0.0	0.0	0.45	0.0	0.0	0.0	0.0	0.0	0.0
P1S4_180725_002_A01	0.0	0.0	0.0	0.0	0.0	0.0	0.0	0.0	0.0	0.0	0.0	0.0	0.0	0.0	0.0	0.0	0.0	0.0	0.0	0.0	0.0	0.0	0.0	0.0	0.0	0.0	0.0	0.0	0.0	0.0	0.0	0.0	0.0	0.0	0.0	0.0	0.02	0.0	0.01	0.44	0.0	0.0	0.53	0.0	0.0	0.0	0.0	0.0	0.0
P1S4_180531_002_A01	0.0	0.0	0.0	0.0	0.0	0.0	0.0	0.0	0.0	0.0	0.0	0.0	0.0	0.0	0.0	0.0	0.0	0.0	0.0	0.0	0.0	0.0	0.0	0.0	0.0	0.0	0.0	0.0	0.0	0.0	0.0	0.0	0.0	0.0	0.0	0.0	0.0	0.0	0.0	0.12	0.03	0.06	0.77	0.0	0.0	0.0	0.0	0.0	0.0
P2S4_171017_052_A01	0.0	0.0	0.0	0.0	0.0	0.0	0.0	0.0	0.0	0.0	0.0	0.0	0.0	0.0	0.0	0.0	0.0	0.0	0.0	0.0	0.0	0.0	0.0	0.0	0.0	0.0	0.0	0.0	0.0	0.0	0.0	0.0	0.0	0.12	0.1	0.1	0.01	0.0	0.0	0.08	0.13	0.14	0.1	0.0	0.0	0.0	0.0	0.0	0.0
PAS4_180724_456_A01	0.0	0.0	0.0	0.0	0.0	0.0	0.0	0.0	0.0	0.0	0.0	0.0	0.0	0.0	0.0	0.0	0.0	0.0	0.0	0.0	0.0	0.0	0.0	0.0	0.0	0.0	0.0	0.0	0.0	0.0	0.0	0.0	0.0	0.0	0.0	0.0	0.09	0.03	0.1	0.25	0.01	0.26	0.07	0.0	0.0	0.0	0.19	0.0	0.0
P1S4_180725_003_A01	0.0	0.0	0.0	0.0	0.0	0.0	0.0	0.0	0.0	0.0	0.0	0.0	0.0	0.0	0.0	0.0	0.0	0.0	0.0	0.0	0.0	0.0	0.0	0.0	0.0	0.0	0.0	0.0	0.0	0.0	0.0	0.0	0.03	0.06	0.3	0.0	0.0	0.0	0.0	0.13	0.03	0.35	0.1	0.0	0.0	0.0	0.0	0.0	0.0
P9S4_171016_401_A01	0.0	0.0	0.0	0.0	0.0	0.0	0.0	0.0	0.0	0.0	0.0	0.0	0.0	0.0	0.0	0.0	0.0	0.0	0.0	0.0	0.0	0.0	0.0	0.0	0.0	0.0	0.0	0.0	0.01	0.0	0.0	0.0	0.0	0.14	0.09	0.0	0.0	0.0	0.0	0.2	0.0	0.55	0.01	0.0	0.0	0.0	0.0	0.0	0.0
PAS4_180829_454_A01	0.0	0.0	0.0	0.0	0.0	0.0	0.0	0.0	0.0	0.0	0.0	0.0	0.0	0.0	0.0	0.0	0.0	0.0	0.0	0.0	0.0	0.0	0.0	0.0	0.0	0.0	0.0	0.0	0.0	0.0	0.0	0.0	0.0	0.18	0.13	0.0	0.0	0.0	0.0	0.13	0.0	0.56	0.0	0.0	0.0	0.0	0.0	0.0	0.0
P2S4_180710_056_A01	0.0	0.0	0.0	0.0	0.0	0.0	0.0	0.0	0.0	0.0	0.0	0.0	0.0	0.0	0.0	0.0	0.0	0.0	0.0	0.0	0.0	0.0	0.0	0.0	0.0	0.0	0.0	0.0	0.0	0.0	0.09	0.0	0.08	0.04	0.06	0.09	0.03	0.09	0.0	0.0	0.1	0.04	0.07	0.03	0.06	0.06	0.06	0.0	0.01
P8S4_171103_354_A01	0.05	0.02	0.0	0.03	0.0	0.0	0.0	0.0	0.0	0.0	0.01	0.0	0.0	0.04	0.0	0.0	0.0	0.0	0.0	0.0	0.0	0.01	0.0	0.0	0.0	0.0	0.0	0.0	0.01	0.0	0.0	0.01	0.0	0.0	0.0	0.0	0.0	0.01	0.0	0.0	0.2	0.0	0.0	0.03	0.11	0.02	0.17	0.0	0.0
P1S4_180813_001_A01	0.0	0.0	0.0	0.0	0.0	0.0	0.0	0.0	0.0	0.0	0.0	0.0	0.0	0.0	0.0	0.0	0.0	0.0	0.0	0.0	0.0	0.0	0.0	0.0	0.0	0.0	0.0	0.0	0.0	0.0	0.01	0.0	0.0	0.09	0.08	0.2	0.02	0.0	0.18	0.25	0.0	0.04	0.11	0.0	0.0	0.0	0.0	0.0	0.0
P2S4_180619_053_A01	0.0	0.0	0.0	0.0	0.0	0.0	0.0	0.0	0.0	0.0	0.0	0.0	0.0	0.0	0.0	0.0	0.0	0.0	0.0	0.0	0.0	0.0	0.0	0.0	0.0	0.0	0.0	0.0	0.0	0.0	0.0	0.09	0.0	0.0	0.0	0.0	0.24	0.0	0.11	0.46	0.0	0.0	0.0	0.0	0.0	0.0	0.0	0.0	0.0
PAS4_180613_451_A01	0.0	0.0	0.0	0.0	0.0	0.0	0.0	0.0	0.0	0.0	0.0	0.0	0.0	0.0	0.0	0.0	0.0	0.0	0.0	0.0	0.0	0.0	0.0	0.0	0.0	0.0	0.0	0.0	0.0	0.0	0.0	0.0	0.0	0.0	0.0	0.0	0.22	0.49	0.29	0.0	0.0	0.0	0.0	0.0	0.0	0.0	0.0	0.0	0.0
P2S4_180314_051_A01	0.0	0.0	0.02	0.0	0.0	0.0	0.0	0.0	0.0	0.0	0.01	0.0	0.0	0.0	0.0	0.01	0.0	0.0	0.0	0.01	0.0	0.01	0.0	0.01	0.0	0.0	0.0	0.0	0.0	0.0	0.0	0.0	0.0	0.0	0.0	0.0	0.0	0.77	0.0	0.0	0.0	0.0	0.0	0.0	0.0	0.0	0.0	0.0	0.0
P1S4_180221_003_A01	0.0	0.0	0.0	0.0	0.0	0.01	0.07	0.0	0.0	0.0	0.0	0.0	0.04	0.0	0.0	0.0	0.0	0.0	0.0	0.0	0.0	0.0	0.0	0.0	0.0	0.0	0.0	0.0	0.0	0.0	0.02	0.01	0.07	0.02	0.01	0.03	0.12	0.0	0.0	0.07	0.01	0.0	0.08	0.03	0.02	0.02	0.07	0.0	0.0
P9S4_180411_403_A01	0.0	0.0	0.0	0.0	0.0	0.0	0.0	0.0	0.0	0.0	0.0	0.0	0.0	0.0	0.0	0.0	0.0	0.0	0.0	0.0	0.0	0.0	0.0	0.0	0.0	0.0	0.0	0.0	0.0	0.0	0.06	0.0	0.13	0.01	0.05	0.1	0.14	0.02	0.0	0.02	0.04	0.0	0.1	0.03	0.05	0.0	0.0	0.06	0.0
PAS4_201102_452_A01	0.0	0.0	0.0	0.0	0.0	0.0	0.0	0.0	0.0	0.0	0.0	0.0	0.0	0.0	0.0	0.0	0.0	0.0	0.0	0.0	0.0	0.0	0.0	0.0	0.0	0.0	0.0	0.0	0.0	0.0	0.0	0.0	0.0	0.01	0.05	0.1	0.18	0.0	0.03	0.02	0.13	0.0	0.17	0.0	0.0	0.17	0.13	0.01	0.0
PAS4_180716_452_A01	0.0	0.0	0.0	0.0	0.0	0.0	0.0	0.0	0.03	0.0	0.02	0.01	0.0	0.0	0.0	0.01	0.0	0.0	0.0	0.0	0.0	0.0	0.01	0.0	0.0	0.0	0.0	0.0	0.0	0.0	0.02	0.08	0.07	0.05	0.02	0.09	0.0	0.04	0.0	0.03	0.0	0.0	0.03	0.03	0.0	0.0	0.01	0.0	0.03
PXS4_180720_904_A01	0.0	0.0	0.0	0.0	0.0	0.0	0.0	0.0	0.0	0.0	0.0	0.0	0.0	0.0	0.0	0.0	0.0	0.0	0.0	0.0	0.0	0.0	0.0	0.0	0.0	0.01	0.0	0.0	0.0	0.0	0.0	0.08	0.08	0.0	0.08	0.09	0.05	0.01	0.02	0.01	0.0	0.05	0.06	0.09	0.03	0.01	0.01	0.07	0.08
P8S4_180406_353_A01	0.0	0.0	0.0	0.0	0.0	0.0	0.04	0.0	0.0	0.0	0.09	0.05	0.05	0.0	0.0	0.0	0.03	0.04	0.01	0.02	0.0	0.0	0.01	0.0	0.0	0.05	0.0	0.0	0.0	0.05	0.02	0.0	0.06	0.06	0.04	0.11	0.01	0.06	0.0	0.04	0.0	0.0	0.05	0.02	0.0	0.05	0.04	0.0	0.0
P9S4_171002_404_A01	0.0	0.0	0.0	0.0	0.0	0.0	0.0	0.0	0.0	0.0	0.0	0.0	0.0	0.0	0.0	0.0	0.0	0.0	0.0	0.0	0.0	0.0	0.0	0.0	0.0	0.0	0.0	0.0	0.0	0.0	0.01	0.06	0.12	0.08	0.03	0.13	0.09	0.0	0.0	0.05	0.07	0.0	0.09	0.06	0.05	0.09	0.02	0.0	0.05
P8S4_180502_352_A01	0.0	0.0	0.0	0.0	0.0	0.0	0.0	0.0	0.0	0.0	0.0	0.0	0.0	0.0	0.0	0.0	0.0	0.0	0.0	0.0	0.0	0.0	0.0	0.0	0.0	0.0	0.0	0.0	0.0	0.0	0.11	0.0	0.05	0.01	0.02	0.13	0.05	0.04	0.01	0.05	0.01	0.01	0.11	0.02	0.01	0.06	0.0	0.0	0.08
PAS4_180730_454_A01	0.0	0.0	0.0	0.0	0.0	0.0	0.0	0.0	0.0	0.0	0.0	0.0	0.0	0.0	0.0	0.0	0.0	0.0	0.0	0.0	0.0	0.0	0.0	0.0	0.0	0.01	0.0	0.0	0.0	0.0	0.01	0.13	0.08	0.0	0.08	0.14	0.02	0.06	0.03	0.03	0.05	0.01	0.1	0.05	0.05	0.0	0.0	0.0	0.11
PAS4_171016_451_A01	0.0	0.0	0.0	0.0	0.0	0.0	0.0	0.0	0.0	0.0	0.0	0.0	0.0	0.0	0.0	0.0	0.0	0.0	0.0	0.0	0.0	0.0	0.0	0.0	0.0	0.0	0.0	0.0	0.0	0.0	0.06	0.03	0.12	0.07	0.06	0.15	0.06	0.0	0.0	0.0	0.08	0.0	0.09	0.04	0.05	0.0	0.04	0.0	0.01
P1S4_180404_003_A01	0.0	0.0	0.0	0.0	0.0	0.01	0.01	0.0	0.0	0.0	0.0	0.0	0.01	0.0	0.0	0.0	0.0	0.0	0.0	0.0	0.0	0.0	0.0	0.0	0.0	0.0	0.0	0.0	0.0	0.0	0.06	0.09	0.09	0.04	0.1	0.15	0.03	0.04	0.0	0.07	0.0	0.07	0.09	0.09	0.03	0.0	0.0	0.0	0.0
PAS4_181113_451_A01	0.0	0.0	0.0	0.0	0.0	0.0	0.0	0.0	0.0	0.0	0.0	0.0	0.0	0.0	0.0	0.0	0.0	0.0	0.0	0.0	0.0	0.0	0.0	0.0	0.0	0.0	0.0	0.0	0.0	0.0	0.07	0.0	0.01	0.06	0.06	0.15	0.08	0.0	0.0	0.07	0.0	0.01	0.13	0.08	0.05	0.04	0.04	0.01	0.0
PAS4_180202_451_A01	0.0	0.0	0.0	0.0	0.0	0.0	0.0	0.0	0.0	0.0	0.0	0.0	0.0	0.0	0.0	0.0	0.0	0.0	0.0	0.0	0.0	0.0	0.0	0.0	0.0	0.0	0.0	0.0	0.0	0.0	0.1	0.0	0.08	0.04	0.06	0.16	0.06	0.04	0.0	0.09	0.01	0.12	0.0	0.1	0.04	0.0	0.04	0.0	0.05
P8S4_180327_351_A01	0.0	0.0	0.0	0.0	0.0	0.0	0.0	0.0	0.0	0.0	0.0	0.0	0.0	0.0	0.0	0.0	0.0	0.0	0.0	0.0	0.0	0.0	0.0	0.0	0.0	0.0	0.0	0.0	0.0	0.0	0.04	0.07	0.11	0.11	0.0	0.17	0.01	0.05	0.0	0.11	0.0	0.0	0.08	0.09	0.01	0.01	0.09	0.05	0.0
P1S4_180416_003_A01	0.0	0.0	0.0	0.0	0.0	0.0	0.0	0.0	0.0	0.0	0.0	0.0	0.0	0.0	0.0	0.0	0.0	0.0	0.0	0.0	0.0	0.0	0.0	0.0	0.0	0.0	0.0	0.0	0.0	0.0	0.04	0.16	0.06	0.03	0.06	0.19	0.03	0.0	0.0	0.0	0.08	0.0	0.19	0.1	0.03	0.0	0.02	0.0	0.01
P1S4_180529_002_A01	0.0	0.0	0.0	0.0	0.0	0.0	0.0	0.0	0.0	0.0	0.0	0.0	0.0	0.0	0.0	0.0	0.0	0.0	0.0	0.0	0.0	0.0	0.0	0.0	0.0	0.0	0.0	0.0	0.0	0.0	0.13	0.01	0.14	0.02	0.14	0.19	0.04	0.0	0.06	0.0	0.0	0.0	0.15	0.09	0.03	0.0	0.0	0.0	0.0
PAS4_180604_453_A01	0.0	0.0	0.0	0.0	0.0	0.0	0.0	0.0	0.0	0.0	0.0	0.0	0.0	0.0	0.0	0.0	0.0	0.0	0.0	0.0	0.0	0.0	0.0	0.0	0.0	0.0	0.0	0.0	0.0	0.0	0.0	0.0	0.0	0.14	0.07	0.21	0.02	0.0	0.0	0.21	0.0	0.07	0.11	0.09	0.03	0.0	0.0	0.0	0.0
P1S4_180823_005_A01	0.0	0.0	0.0	0.0	0.0	0.0	0.0	0.0	0.0	0.0	0.0	0.0	0.0	0.0	0.0	0.0	0.0	0.0	0.0	0.0	0.0	0.0	0.0	0.0	0.0	0.0	0.0	0.0	0.0	0.0	0.0	0.0	0.01	0.01	0.0	0.22	0.0	0.0	0.14	0.17	0.0	0.0	0.15	0.0	0.01	0.16	0.0	0.13	0.0
P9S4_180227_402_A01	0.0	0.0	0.0	0.0	0.0	0.0	0.01	0.01	0.0	0.0	0.0	0.0	0.0	0.0	0.0	0.0	0.0	0.0	0.0	0.0	0.0	0.0	0.0	0.0	0.0	0.0	0.0	0.0	0.0	0.0	0.14	0.0	0.05	0.01	0.17	0.24	0.19	0.02	0.05	0.01	0.0	0.0	0.08	0.0	0.0	0.0	0.0	0.0	0.0
P2S4_180220_051_A01	0.0	0.0	0.0	0.0	0.0	0.0	0.0	0.0	0.0	0.0	0.0	0.0	0.0	0.0	0.0	0.0	0.0	0.0	0.0	0.0	0.0	0.0	0.0	0.0	0.0	0.0	0.0	0.0	0.0	0.0	0.2	0.01	0.16	0.13	0.1	0.24	0.0	0.0	0.0	0.0	0.0	0.02	0.14	0.0	0.0	0.0	0.0	0.0	0.0
PAS4_180828_454_A01	0.0	0.0	0.0	0.0	0.0	0.0	0.0	0.0	0.0	0.0	0.0	0.0	0.0	0.0	0.0	0.0	0.0	0.0	0.0	0.0	0.0	0.0	0.0	0.0	0.0	0.0	0.0	0.0	0.0	0.0	0.0	0.06	0.0	0.01	0.02	0.73	0.06	0.0	0.0	0.0	0.0	0.0	0.0	0.0	0.0	0.0	0.0	0.0	0.0
P1S4_180221_001_A01	0.06	0.0	0.0	0.0	0.05	0.0	0.01	0.0	0.0	0.0	0.04	0.0	0.09	0.0	0.0	0.0	0.0	0.0	0.0	0.0	0.0	0.0	0.0	0.0	0.0	0.0	0.0	0.0	0.0	0.0	0.01	0.07	0.03	0.03	0.11	0.09	0.06	0.0	0.0	0.0	0.05	0.0	0.07	0.05	0.09	0.0	0.04	0.05	0.0
P8S4_200807_352_A01	0.0	0.0	0.0	0.04	0.0	0.02	0.0	0.0	0.0	0.0	0.0	0.01	0.0	0.07	0.0	0.0	0.0	0.0	0.0	0.0	0.0	0.0	0.0	0.0	0.0	0.0	0.0	0.0	0.0	0.0	0.0	0.07	0.09	0.05	0.13	0.1	0.02	0.08	0.0	0.04	0.06	0.0	0.12	0.06	0.03	0.0	0.01	0.0	0.0
PBS4_180731_504_A01	0.0	0.0	0.0	0.0	0.0	0.0	0.0	0.0	0.0	0.0	0.0	0.0	0.0	0.0	0.0	0.0	0.0	0.0	0.0	0.0	0.0	0.0	0.0	0.0	0.0	0.0	0.0	0.0	0.0	0.0	0.0	0.03	0.12	0.04	0.15	0.1	0.08	0.0	0.0	0.09	0.06	0.0	0.06	0.1	0.05	0.02	0.01	0.01	0.01
PBS4_180403_503_A01	0.0	0.0	0.0	0.0	0.0	0.02	0.03	0.02	0.0	0.0	0.0	0.0	0.01	0.0	0.0	0.01	0.0	0.01	0.0	0.0	0.0	0.0	0.0	0.0	0.0	0.0	0.0	0.0	0.06	0.0	0.0	0.0	0.01	0.13	0.17	0.04	0.0	0.0	0.0	0.0	0.0	0.0	0.14	0.0	0.0	0.01	0.0	0.0	0.0
P8S4_180820_361_A01	0.0	0.0	0.0	0.0	0.0	0.0	0.0	0.0	0.0	0.0	0.0	0.0	0.0	0.0	0.0	0.0	0.0	0.0	0.0	0.0	0.0	0.0	0.0	0.0	0.0	0.0	0.0	0.0	0.0	0.0	0.01	0.09	0.0	0.02	0.19	0.15	0.14	0.01	0.0	0.06	0.08	0.11	0.0	0.12	0.02	0.0	0.0	0.0	0.0
P1S4_180227_001_A01	0.0	0.0	0.0	0.0	0.0	0.0	0.0	0.0	0.0	0.0	0.0	0.0	0.0	0.0	0.0	0.0	0.0	0.0	0.0	0.0	0.0	0.0	0.0	0.0	0.0	0.0	0.0	0.0	0.0	0.0	0.07	0.11	0.19	0.02	0.21	0.0	0.0	0.0	0.0	0.0	0.0	0.0	0.2	0.14	0.05	0.0	0.0	0.0	0.0
PBS4_180302_503_A01	0.0	0.0	0.0	0.0	0.0	0.0	0.0	0.0	0.0	0.0	0.0	0.0	0.0	0.0	0.0	0.0	0.0	0.0	0.0	0.0	0.0	0.0	0.0	0.0	0.0	0.0	0.0	0.0	0.0	0.0	0.27	0.01	0.06	0.28	0.38	0.0	0.0	0.0	0.0	0.0	0.0	0.0	0.0	0.0	0.0	0.0	0.0	0.0	0.0
PBS4_171013_504_A01	0.0	0.0	0.0	0.0	0.0	0.0	0.0	0.0	0.0	0.0	0.0	0.0	0.0	0.0	0.0	0.0	0.0	0.0	0.0	0.0	0.0	0.0	0.0	0.0	0.0	0.0	0.0	0.0	0.0	0.0	0.0	0.01	0.01	0.46	0.52	0.0	0.0	0.0	0.0	0.0	0.0	0.0	0.0	0.0	0.0	0.0	0.0	0.0	0.0
P2S4_180710_057_A01	0.0	0.0	0.0	0.0	0.0	0.0	0.0	0.0	0.0	0.0	0.0	0.0	0.0	0.0	0.0	0.0	0.0	0.0	0.0	0.0	0.0	0.0	0.0	0.0	0.0	0.0	0.0	0.0	0.0	0.0	0.0	0.0	0.0	0.0	0.71	0.0	0.0	0.0	0.0	0.0	0.0	0.0	0.29	0.0	0.0	0.0	0.0	0.0	0.0
P1S4_180706_002_A01	0.13	0.0	0.0	0.01	0.0	0.04	0.02	0.0	0.0	0.0	0.0	0.0	0.03	0.0	0.0	0.0	0.0	0.0	0.0	0.0	0.0	0.0	0.0	0.0	0.0	0.0	0.0	0.0	0.0	0.0	0.0	0.14	0.13	0.18	0.01	0.15	0.0	0.0	0.0	0.0	0.0	0.0	0.16	0.0	0.0	0.0	0.0	0.0	0.0
P1S4_180530_001_A01	0.0	0.0	0.0	0.0	0.0	0.0	0.0	0.0	0.0	0.0	0.0	0.0	0.0	0.0	0.0	0.0	0.0	0.0	0.0	0.0	0.0	0.0	0.0	0.0	0.0	0.0	0.0	0.0	0.0	0.0	0.0	0.0	0.0	0.64	0.04	0.12	0.05	0.0	0.03	0.0	0.0	0.01	0.1	0.01	0.0	0.0	0.0	0.0	0.0
P8S4_180305_354_A01	0.0	0.01	0.0	0.01	0.0	0.01	0.0	0.0	0.0	0.0	0.01	0.0	0.01	0.0	0.0	0.0	0.0	0.01	0.01	0.0	0.0	0.0	0.0	0.0	0.0	0.0	0.01	0.0	0.02	0.0	0.05	0.0	0.12	0.03	0.02	0.1	0.02	0.03	0.0	0.03	0.02	0.03	0.07	0.03	0.02	0.02	0.03	0.0	0.0
P9S4_180622_402_A01	0.0	0.0	0.0	0.0	0.0	0.0	0.0	0.0	0.0	0.0	0.0	0.0	0.0	0.0	0.0	0.0	0.0	0.0	0.0	0.0	0.0	0.0	0.0	0.0	0.0	0.0	0.0	0.0	0.0	0.0	0.08	0.0	0.13	0.04	0.03	0.08	0.05	0.05	0.0	0.09	0.03	0.0	0.07	0.07	0.03	0.0	0.07	0.0	0.0
P2S4_180206_051_A01	0.0	0.0	0.0	0.0	0.0	0.0	0.0	0.0	0.0	0.0	0.0	0.0	0.0	0.0	0.0	0.0	0.0	0.0	0.0	0.0	0.0	0.0	0.0	0.0	0.0	0.0	0.0	0.0	0.0	0.0	0.09	0.01	0.14	0.02	0.05	0.13	0.05	0.02	0.0	0.0	0.14	0.08	0.08	0.07	0.05	0.03	0.01	0.02	0.01
PBS4_180604_502_A01	0.0	0.0	0.0	0.0	0.0	0.0	0.0	0.0	0.0	0.0	0.0	0.0	0.0	0.0	0.0	0.0	0.0	0.0	0.0	0.0	0.0	0.0	0.0	0.0	0.0	0.0	0.0	0.0	0.0	0.0	0.04	0.0	0.15	0.03	0.03	0.07	0.02	0.0	0.01	0.0	0.09	0.0	0.07	0.03	0.05	0.0	0.11	0.0	0.0
P8S4_180504_356_A01	0.0	0.0	0.0	0.01	0.0	0.0	0.04	0.0	0.0	0.0	0.01	0.0	0.0	0.02	0.01	0.0	0.01	0.0	0.0	0.0	0.01	0.0	0.0	0.0	0.0	0.01	0.0	0.0	0.02	0.0	0.0	0.08	0.15	0.03	0.01	0.01	0.0	0.0	0.0	0.0	0.0	0.0	0.0	0.0	0.0	0.0	0.01	0.0	0.01
P8S4_180206_353_A01	0.0	0.0	0.0	0.0	0.0	0.0	0.0	0.0	0.0	0.0	0.0	0.0	0.0	0.0	0.0	0.0	0.0	0.0	0.0	0.0	0.0	0.0	0.0	0.0	0.0	0.0	0.0	0.0	0.0	0.0	0.0	0.15	0.17	0.03	0.1	0.12	0.07	0.07	0.0	0.0	0.0	0.0	0.0	0.07	0.08	0.0	0.0	0.14	0.0
PBS4_180315_502_A01	0.01	0.0	0.0	0.0	0.0	0.0	0.01	0.0	0.0	0.0	0.0	0.0	0.0	0.0	0.01	0.0	0.0	0.0	0.0	0.0	0.0	0.0	0.0	0.0	0.0	0.0	0.0	0.0	0.0	0.0	0.0	0.15	0.18	0.03	0.1	0.17	0.11	0.0	0.08	0.02	0.0	0.0	0.0	0.06	0.0	0.0	0.0	0.0	0.0
PAS4_180409_451_A01	0.0	0.0	0.0	0.0	0.0	0.0	0.0	0.0	0.0	0.0	0.0	0.0	0.0	0.0	0.0	0.0	0.0	0.0	0.0	0.0	0.0	0.0	0.0	0.0	0.0	0.0	0.0	0.0	0.0	0.0	0.15	0.0	0.19	0.04	0.11	0.11	0.0	0.0	0.0	0.15	0.02	0.17	0.0	0.0	0.0	0.0	0.0	0.0	0.0
PFS4_181003_703_A01	0.0	0.0	0.0	0.0	0.0	0.0	0.0	0.0	0.0	0.0	0.0	0.0	0.0	0.0	0.0	0.0	0.0	0.0	0.0	0.0	0.0	0.0	0.0	0.0	0.0	0.0	0.0	0.0	0.0	0.01	0.11	0.0	0.2	0.07	0.08	0.14	0.02	0.03	0.03	0.13	0.0	0.0	0.11	0.0	0.0	0.0	0.07	0.0	0.0
PAS4_180619_454_A01	0.0	0.0	0.0	0.0	0.0	0.0	0.0	0.0	0.0	0.0	0.0	0.0	0.0	0.0	0.0	0.0	0.0	0.0	0.0	0.0	0.0	0.0	0.0	0.0	0.0	0.0	0.0	0.0	0.0	0.0	0.0	0.16	0.2	0.09	0.09	0.17	0.06	0.0	0.0	0.0	0.0	0.0	0.0	0.15	0.06	0.0	0.0	0.0	0.0
P8S4_190328_356_A01	0.03	0.0	0.0	0.0	0.0	0.01	0.04	0.0	0.0	0.0	0.05	0.0	0.01	0.0	0.0	0.0	0.0	0.0	0.0	0.0	0.0	0.0	0.0	0.0	0.0	0.0	0.0	0.0	0.0	0.0	0.08	0.04	0.24	0.03	0.11	0.21	0.09	0.0	0.0	0.0	0.0	0.0	0.04	0.0	0.0	0.0	0.0	0.0	0.0
P1S4_190320_001_A01	0.06	0.0	0.01	0.05	0.0	0.0	0.0	0.0	0.0	0.0	0.01	0.0	0.09	0.0	0.0	0.0	0.0	0.0	0.0	0.0	0.0	0.0	0.0	0.0	0.0	0.0	0.0	0.0	0.0	0.08	0.0	0.11	0.01	0.04	0.07	0.05	0.02	0.02	0.0	0.02	0.03	0.0	0.06	0.02	0.01	0.01	0.03	0.0	0.0
P2S4_180914_052_A01	0.0	0.0	0.0	0.0	0.0	0.0	0.0	0.0	0.0	0.0	0.0	0.0	0.0	0.0	0.0	0.0	0.0	0.0	0.0	0.0	0.0	0.0	0.0	0.0	0.0	0.0	0.0	0.0	0.0	0.0	0.03	0.15	0.09	0.01	0.06	0.13	0.03	0.03	0.01	0.0	0.05	0.0	0.07	0.06	0.03	0.0	0.09	0.0	0.03
P9S4_180727_406_A01	0.04	0.0	0.0	0.01	0.02	0.0	0.0	0.0	0.0	0.0	0.08	0.06	0.01	0.0	0.05	0.06	0.0	0.0	0.0	0.0	0.0	0.01	0.0	0.0	0.0	0.04	0.0	0.0	0.0	0.0	0.05	0.15	0.05	0.01	0.04	0.0	0.0	0.0	0.0	0.0	0.0	0.0	0.04	0.03	0.05	0.0	0.09	0.0	0.0
PAS4_180629_453_A01	0.0	0.0	0.0	0.0	0.0	0.0	0.0	0.0	0.0	0.0	0.0	0.0	0.0	0.0	0.0	0.0	0.0	0.0	0.0	0.0	0.0	0.0	0.0	0.0	0.0	0.0	0.0	0.0	0.0	0.0	0.0	0.18	0.18	0.07	0.0	0.02	0.1	0.05	0.03	0.0	0.1	0.0	0.0	0.01	0.0	0.0	0.07	0.0	0.15
P9S4_171002_403_A01	0.0	0.0	0.0	0.0	0.0	0.0	0.0	0.0	0.0	0.0	0.0	0.0	0.0	0.0	0.0	0.0	0.0	0.0	0.0	0.0	0.0	0.0	0.0	0.0	0.0	0.0	0.0	0.0	0.0	0.0	0.0	0.19	0.08	0.03	0.1	0.18	0.0	0.06	0.0	0.0	0.02	0.0	0.02	0.04	0.06	0.0	0.0	0.0	0.09
PBS4_180320_501_A01	0.0	0.0	0.0	0.0	0.0	0.0	0.0	0.0	0.0	0.0	0.0	0.0	0.0	0.0	0.0	0.0	0.0	0.0	0.0	0.0	0.0	0.0	0.0	0.0	0.0	0.0	0.0	0.0	0.0	0.0	0.0	0.2	0.12	0.03	0.1	0.09	0.11	0.0	0.0	0.01	0.0	0.0	0.11	0.02	0.0	0.06	0.0	0.0	0.0
P8S4_181001_357_A01	0.0	0.0	0.0	0.0	0.0	0.0	0.0	0.0	0.0	0.0	0.0	0.0	0.0	0.0	0.0	0.0	0.0	0.0	0.0	0.0	0.0	0.0	0.0	0.0	0.0	0.0	0.0	0.0	0.0	0.0	0.0	0.2	0.18	0.03	0.08	0.18	0.0	0.07	0.0	0.03	0.01	0.0	0.19	0.0	0.01	0.0	0.0	0.0	0.02
P1S4_190329_001_A01	0.0	0.0	0.0	0.0	0.0	0.0	0.0	0.0	0.0	0.0	0.0	0.0	0.0	0.0	0.0	0.0	0.0	0.0	0.0	0.0	0.0	0.0	0.0	0.0	0.0	0.0	0.0	0.0	0.0	0.0	0.03	0.22	0.16	0.04	0.14	0.03	0.0	0.0	0.0	0.0	0.0	0.0	0.09	0.01	0.01	0.0	0.02	0.0	0.0
PBS4_171109_504_A01	0.0	0.0	0.0	0.0	0.0	0.0	0.0	0.0	0.0	0.0	0.0	0.0	0.0	0.0	0.0	0.0	0.0	0.0	0.0	0.0	0.0	0.0	0.0	0.0	0.0	0.0	0.0	0.0	0.0	0.0	0.0	0.23	0.23	0.09	0.1	0.17	0.05	0.02	0.01	0.0	0.0	0.0	0.06	0.0	0.0	0.0	0.0	0.0	0.0
PBS4_180605_502_A01	0.0	0.0	0.0	0.0	0.0	0.0	0.0	0.0	0.0	0.0	0.0	0.0	0.0	0.0	0.0	0.0	0.0	0.0	0.0	0.0	0.0	0.0	0.0	0.0	0.0	0.0	0.0	0.0	0.0	0.0	0.0	0.37	0.31	0.23	0.09	0.0	0.0	0.0	0.0	0.0	0.0	0.0	0.0	0.0	0.0	0.0	0.0	0.0	0.0
P1S4_180622_003_A01	0.0	0.0	0.0	0.0	0.0	0.0	0.08	0.04	0.0	0.0	0.01	0.0	0.04	0.0	0.0	0.0	0.0	0.0	0.0	0.0	0.0	0.0	0.0	0.0	0.0	0.0	0.0	0.0	0.0	0.0	0.12	0.0	0.11	0.04	0.05	0.06	0.09	0.0	0.0	0.02	0.0	0.05	0.03	0.04	0.03	0.01	0.0	0.0	0.0
P1S4_180622_002_A01	0.0	0.0	0.0	0.0	0.0	0.0	0.0	0.0	0.0	0.0	0.0	0.0	0.0	0.0	0.0	0.0	0.0	0.0	0.0	0.0	0.0	0.0	0.0	0.0	0.0	0.0	0.0	0.0	0.0	0.0	0.15	0.01	0.04	0.02	0.03	0.12	0.02	0.04	0.0	0.08	0.0	0.03	0.1	0.02	0.1	0.0	0.0	0.1	0.0
P2S4_180131_051_A01	0.01	0.01	0.0	0.0	0.0	0.0	0.03	0.0	0.02	0.0	0.04	0.06	0.0	0.0	0.0	0.0	0.0	0.0	0.0	0.0	0.0	0.0	0.0	0.0	0.0	0.01	0.0	0.0	0.06	0.0	0.16	0.0	0.07	0.0	0.07	0.1	0.08	0.01	0.0	0.02	0.04	0.0	0.07	0.1	0.02	0.0	0.0	0.0	0.0
P1S4_180302_002_A01	0.0	0.0	0.0	0.0	0.0	0.0	0.0	0.0	0.0	0.0	0.0	0.0	0.0	0.0	0.0	0.0	0.0	0.0	0.0	0.0	0.0	0.0	0.0	0.0	0.0	0.0	0.0	0.0	0.0	0.0	0.17	0.04	0.17	0.11	0.12	0.06	0.0	0.0	0.0	0.0	0.0	0.0	0.12	0.07	0.02	0.12	0.0	0.0	0.0
P1S4_180910_002_A01	0.0	0.0	0.0	0.0	0.0	0.0	0.0	0.0	0.0	0.0	0.0	0.0	0.0	0.0	0.0	0.0	0.0	0.0	0.0	0.0	0.0	0.0	0.0	0.0	0.0	0.0	0.0	0.0	0.0	0.0	0.18	0.0	0.15	0.12	0.01	0.08	0.03	0.07	0.0	0.11	0.0	0.0	0.12	0.11	0.01	0.01	0.0	0.0	0.0
PAS4_180620_454_A01	0.0	0.0	0.0	0.0	0.0	0.0	0.01	0.11	0.0	0.0	0.03	0.12	0.03	0.0	0.0	0.0	0.0	0.0	0.03	0.02	0.0	0.0	0.0	0.0	0.0	0.0	0.04	0.02	0.03	0.13	0.01	0.04	0.02	0.02	0.02	0.03	0.0	0.05	0.0	0.0	0.0	0.01	0.0	0.01	0.02	0.0	0.0	0.0	0.0
P2S4_180131_052_A01	0.0	0.0	0.0	0.0	0.0	0.0	0.0	0.0	0.0	0.0	0.0	0.0	0.0	0.0	0.0	0.0	0.0	0.0	0.0	0.0	0.0	0.0	0.0	0.0	0.0	0.0	0.0	0.0	0.0	0.17	0.09	0.03	0.0	0.05	0.04	0.1	0.0	0.0	0.0	0.01	0.11	0.0	0.11	0.11	0.04	0.0	0.0	0.0	0.0
PJS4_200911_801_A01	0.0	0.0	0.12	0.1	0.0	0.0	0.02	0.0	0.0	0.0	0.0	0.0	0.0	0.01	0.17	0.0	0.0	0.0	0.0	0.0	0.0	0.0	0.0	0.0	0.0	0.0	0.0	0.0	0.0	0.18	0.01	0.0	0.0	0.0	0.02	0.0	0.01	0.0	0.0	0.0	0.04	0.0	0.0	0.01	0.01	0.0	0.0	0.0	0.01
PBS4_180706_507_A01	0.06	0.02	0.04	0.01	0.0	0.0	0.0	0.08	0.0	0.0	0.19	0.0	0.21	0.0	0.0	0.0	0.0	0.0	0.0	0.0	0.0	0.0	0.0	0.0	0.0	0.0	0.0	0.0	0.0	0.23	0.0	0.0	0.0	0.0	0.0	0.0	0.0	0.01	0.0	0.0	0.0	0.01	0.0	0.01	0.0	0.0	0.0	0.0	0.0
P8S4_171115_352_A01	0.03	0.02	0.02	0.02	0.06	0.0	0.0	0.03	0.0	0.0	0.08	0.06	0.0	0.0	0.0	0.03	0.0	0.0	0.0	0.12	0.0	0.02	0.03	0.0	0.0	0.07	0.0	0.0	0.01	0.23	0.0	0.02	0.02	0.0	0.0	0.0	0.02	0.01	0.0	0.02	0.0	0.0	0.0	0.01	0.0	0.0	0.0	0.0	0.0
PAS4_190522_455_A01	0.03	0.0	0.03	0.05	0.0	0.0	0.0	0.02	0.0	0.0	0.13	0.0	0.0	0.0	0.0	0.0	0.0	0.0	0.0	0.0	0.0	0.0	0.0	0.0	0.0	0.0	0.0	0.0	0.0	0.27	0.0	0.03	0.04	0.01	0.01	0.02	0.02	0.0	0.02	0.0	0.0	0.0	0.01	0.01	0.0	0.0	0.0	0.02	0.01
PJS4_200921_802_A01	0.0	0.0	0.0	0.0	0.0	0.0	0.0	0.0	0.0	0.0	0.0	0.0	0.0	0.0	0.0	0.0	0.0	0.0	0.0	0.0	0.0	0.0	0.0	0.0	0.0	0.0	0.0	0.0	0.0	0.3	0.02	0.03	0.04	0.03	0.0	0.02	0.07	0.0	0.0	0.06	0.0	0.03	0.02	0.02	0.01	0.01	0.02	0.0	0.0
PBS4_180502_504_A01	0.0	0.0	0.0	0.0	0.0	0.0	0.0	0.0	0.0	0.0	0.0	0.0	0.0	0.0	0.0	0.0	0.0	0.0	0.0	0.0	0.0	0.0	0.0	0.0	0.0	0.0	0.0	0.0	0.0	0.31	0.03	0.02	0.02	0.02	0.02	0.01	0.03	0.02	0.0	0.05	0.0	0.0	0.04	0.04	0.03	0.0	0.0	0.0	0.08
P2S4_180518_051_A01	0.0	0.0	0.0	0.0	0.0	0.0	0.0	0.0	0.0	0.0	0.0	0.0	0.0	0.0	0.0	0.0	0.0	0.0	0.0	0.0	0.0	0.0	0.0	0.0	0.0	0.0	0.0	0.0	0.0	0.33	0.0	0.07	0.11	0.02	0.01	0.07	0.0	0.0	0.0	0.0	0.03	0.0	0.01	0.0	0.03	0.01	0.06	0.01	0.02
PES4_181017_659_A01	0.0	0.0	0.0	0.0	0.0	0.0	0.0	0.0	0.04	0.0	0.01	0.0	0.0	0.0	0.0	0.04	0.0	0.0	0.0	0.0	0.0	0.0	0.0	0.0	0.01	0.01	0.0	0.0	0.0	0.34	0.01	0.0	0.0	0.0	0.0	0.0	0.0	0.0	0.0	0.0	0.0	0.0	0.0	0.0	0.0	0.0	0.0	0.0	0.0
PES4_190308_654_A01	0.04	0.0	0.0	0.0	0.01	0.02	0.05	0.01	0.0	0.0	0.02	0.12	0.0	0.0	0.0	0.01	0.0	0.0	0.0	0.0	0.01	0.0	0.0	0.0	0.0	0.0	0.05	0.14	0.02	0.38	0.01	0.0	0.02	0.0	0.0	0.01	0.01	0.0	0.02	0.0	0.0	0.0	0.02	0.02	0.01	0.0	0.0	0.0	0.0
P9S4_180122_403_A01	0.0	0.0	0.0	0.0	0.01	0.0	0.0	0.01	0.0	0.0	0.01	0.0	0.01	0.0	0.0	0.0	0.01	0.02	0.0	0.0	0.0	0.0	0.0	0.0	0.0	0.0	0.0	0.0	0.01	0.4	0.0	0.02	0.02	0.0	0.03	0.02	0.02	0.0	0.0	0.01	0.0	0.0	0.02	0.01	0.01	0.0	0.01	0.0	0.01
PJS4_200921_801_A01	0.0	0.0	0.0	0.0	0.0	0.0	0.0	0.0	0.0	0.0	0.0	0.0	0.0	0.0	0.0	0.0	0.0	0.0	0.0	0.0	0.0	0.0	0.0	0.0	0.0	0.0	0.0	0.0	0.0	0.47	0.0	0.02	0.05	0.0	0.01	0.01	0.01	0.01	0.0	0.0	0.0	0.0	0.0	0.01	0.02	0.0	0.0	0.0	0.01
P8S4_180305_357_A01	0.0	0.0	0.0	0.0	0.0	0.0	0.0	0.0	0.0	0.0	0.0	0.0	0.0	0.0	0.0	0.0	0.0	0.0	0.0	0.0	0.0	0.0	0.0	0.0	0.0	0.0	0.0	0.0	0.0	0.48	0.0	0.09	0.11	0.02	0.05	0.07	0.04	0.0	0.0	0.0	0.01	0.03	0.03	0.04	0.01	0.0	0.01	0.0	0.0
P1S4_190329_003_A01	0.0	0.0	0.0	0.0	0.0	0.0	0.0	0.0	0.0	0.0	0.0	0.0	0.0	0.0	0.0	0.0	0.0	0.0	0.0	0.0	0.0	0.0	0.0	0.0	0.0	0.0	0.0	0.0	0.0	0.57	0.0	0.0	0.05	0.01	0.01	0.06	0.01	0.03	0.01	0.02	0.05	0.0	0.04	0.07	0.0	0.0	0.05	0.0	0.0
P8S4_180403_351_A01	0.0	0.0	0.0	0.0	0.0	0.0	0.0	0.0	0.0	0.0	0.0	0.0	0.0	0.0	0.0	0.0	0.0	0.0	0.0	0.0	0.0	0.0	0.0	0.0	0.0	0.0	0.0	0.0	0.0	0.62	0.0	0.0	0.0	0.0	0.0	0.0	0.0	0.0	0.0	0.0	0.0	0.0	0.0	0.0	0.0	0.0	0.0	0.0	0.0
PAS4_181115_452_A01	0.0	0.0	0.0	0.0	0.0	0.0	0.0	0.0	0.0	0.0	0.0	0.0	0.0	0.0	0.0	0.0	0.0	0.0	0.0	0.0	0.0	0.0	0.0	0.0	0.0	0.0	0.0	0.0	0.0	0.72	0.03	0.0	0.04	0.01	0.02	0.03	0.02	0.0	0.01	0.01	0.01	0.03	0.0	0.01	0.01	0.01	0.04	0.0	0.0
P8S4_180502_353_A01	0.0	0.0	0.01	0.0	0.0	0.0	0.02	0.0	0.0	0.0	0.0	0.0	0.0	0.0	0.0	0.0	0.0	0.01	0.0	0.0	0.0	0.0	0.0	0.0	0.0	0.0	0.0	0.0	0.0	0.78	0.0	0.01	0.01	0.0	0.01	0.01	0.01	0.0	0.0	0.0	0.0	0.0	0.02	0.02	0.0	0.0	0.0	0.0	0.01
PAS4_180425_453_A01	0.0	0.0	0.0	0.0	0.0	0.0	0.0	0.0	0.0	0.0	0.0	0.0	0.0	0.0	0.0	0.0	0.0	0.0	0.0	0.0	0.0	0.0	0.0	0.0	0.0	0.0	0.0	0.0	0.0	0.79	0.0	0.01	0.03	0.03	0.0	0.0	0.03	0.0	0.0	0.0	0.0	0.0	0.02	0.01	0.01	0.01	0.0	0.01	0.0
PAS4_201021_451_A01	0.0	0.0	0.0	0.0	0.0	0.0	0.0	0.06	0.0	0.0	0.05	0.03	0.0	0.0	0.0	0.01	0.0	0.0	0.0	0.0	0.0	0.0	0.0	0.0	0.0	0.0	0.0	0.0	0.0	0.81	0.0	0.0	0.0	0.0	0.0	0.0	0.0	0.0	0.0	0.0	0.01	0.0	0.0	0.0	0.01	0.0	0.0	0.0	0.0
PAS4_190111_452_A01	0.0	0.0	0.0	0.0	0.0	0.0	0.0	0.0	0.0	0.0	0.0	0.0	0.0	0.0	0.0	0.0	0.0	0.0	0.0	0.0	0.0	0.0	0.0	0.0	0.0	0.0	0.0	0.0	0.0	0.82	0.01	0.01	0.05	0.01	0.0	0.0	0.0	0.0	0.01	0.01	0.0	0.0	0.02	0.04	0.0	0.02	0.0	0.0	0.0
P2S4_180306_053_A01	0.0	0.0	0.0	0.0	0.0	0.0	0.0	0.0	0.0	0.0	0.0	0.0	0.0	0.0	0.0	0.0	0.0	0.0	0.0	0.0	0.0	0.0	0.0	0.0	0.0	0.0	0.0	0.0	0.0	0.95	0.0	0.0	0.0	0.0	0.0	0.0	0.0	0.0	0.0	0.0	0.0	0.0	0.0	0.0	0.0	0.0	0.0	0.0	0.0
PAS4_180518_451_A01	0.0	0.0	0.0	0.0	0.0	0.0	0.0	0.0	0.0	0.0	0.0	0.0	0.0	0.0	0.0	0.0	0.0	0.0	0.0	0.0	0.0	0.0	0.0	0.0	0.0	0.0	0.0	0.0	0.0	0.99	0.0	0.0	0.0	0.0	0.0	0.0	0.0	0.0	0.0	0.01	0.0	0.0	0.0	0.0	0.0	0.0	0.0	0.0	0.0
PAS4_180720_452_A01	0.0	0.0	0.0	0.0	0.0	0.0	0.0	0.0	0.0	0.0	0.0	0.0	0.0	0.0	0.0	0.0	0.0	0.0	0.0	0.0	0.0	0.0	0.0	0.0	0.0	0.0	0.0	0.0	0.0	1.0	0.0	0.0	0.0	0.0	0.0	0.0	0.0	0.0	0.0	0.0	0.0	0.0	0.0	0.0	0.0	0.0	0.0	0.0	0.0
P1S4_181127_002_A01	0.0	0.0	0.0	0.0	0.0	0.0	0.0	0.0	0.0	0.0	0.0	0.0	0.0	0.0	0.0	0.0	0.0	0.0	0.0	0.0	0.0	0.0	0.0	0.0	0.0	0.0	0.0	0.0	0.0	1.0	0.0	0.0	0.0	0.0	0.0	0.0	0.0	0.0	0.0	0.0	0.0	0.0	0.0	0.0	0.0	0.0	0.0	0.0	0.0
PAS4_200813_451_A01	0.0	0.0	0.0	0.0	0.0	0.0	0.0	0.0	0.0	0.0	0.0	0.0	0.0	0.0	0.0	0.0	0.0	0.0	0.0	0.0	0.0	0.0	0.0	0.0	0.0	0.0	0.0	0.0	0.0	1.0	0.0	0.0	0.0	0.0	0.0	0.0	0.0	0.0	0.0	0.0	0.0	0.0	0.0	0.0	0.0	0.0	0.0	0.0	0.0
PBS4_180529_508_A01	0.09	0.01	0.0	0.0	0.0	0.0	0.0	0.0	0.0	0.0	0.0	0.0	0.15	0.02	0.03	0.0	0.0	0.0	0.0	0.0	0.0	0.0	0.0	0.0	0.0	0.0	0.0	0.0	0.28	0.05	0.04	0.0	0.02	0.01	0.01	0.03	0.01	0.0	0.0	0.01	0.0	0.0	0.0	0.02	0.0	0.01	0.04	0.01	0.0
PBS4_180928_502_A01	0.0	0.0	0.01	0.09	0.03	0.0	0.0	0.0	0.0	0.0	0.0	0.19	0.1	0.0	0.0	0.0	0.0	0.0	0.0	0.0	0.0	0.0	0.0	0.0	0.0	0.02	0.0	0.0	0.45	0.0	0.0	0.0	0.0	0.0	0.0	0.0	0.0	0.0	0.0	0.0	0.0	0.0	0.0	0.0	0.0	0.0	0.05	0.0	0.0
P1S4_180409_002_A01	0.0	0.0	0.02	0.0	0.0	0.0	0.0	0.0	0.01	0.0	0.0	0.0	0.0	0.0	0.0	0.0	0.0	0.0	0.0	0.0	0.0	0.0	0.0	0.0	0.0	0.0	0.13	0.1	0.74	0.0	0.0	0.0	0.0	0.0	0.0	0.0	0.0	0.0	0.0	0.0	0.0	0.0	0.0	0.0	0.0	0.0	0.0	0.0	0.0
PBS4_180504_501_A01	0.0	0.0	0.0	0.13	0.0	0.03	0.02	0.0	0.0	0.0	0.16	0.12	0.06	0.0	0.0	0.04	0.01	0.0	0.0	0.0	0.0	0.0	0.0	0.0	0.0	0.01	0.09	0.23	0.1	0.0	0.0	0.0	0.0	0.0	0.0	0.0	0.0	0.0	0.0	0.0	0.0	0.0	0.0	0.0	0.0	0.0	0.0	0.0	0.0
P2S4_180126_055_A01	0.0	0.0	0.0	0.0	0.0	0.0	0.0	0.0	0.0	0.0	0.0	0.0	0.0	0.0	0.0	0.03	0.0	0.0	0.0	0.0	0.0	0.02	0.04	0.01	0.0	0.04	0.42	0.43	0.0	0.0	0.0	0.0	0.0	0.0	0.0	0.0	0.0	0.0	0.0	0.0	0.0	0.0	0.0	0.0	0.0	0.0	0.0	0.0	0.0
PBS4_180409_501_A01	0.0	0.0	0.0	0.0	0.0	0.0	0.0	0.0	0.0	0.0	0.0	0.0	0.0	0.0	0.0	0.0	0.0	0.0	0.0	0.0	0.0	0.02	0.01	0.0	0.0	0.0	0.04	0.81	0.0	0.0	0.0	0.0	0.0	0.0	0.0	0.0	0.0	0.0	0.0	0.0	0.0	0.0	0.0	0.0	0.0	0.0	0.0	0.0	0.0
P8S4_201008_355_A01	0.0	0.0	0.05	0.01	0.11	0.0	0.0	0.0	0.02	0.02	0.07	0.0	0.0	0.0	0.02	0.03	0.0	0.0	0.0	0.02	0.02	0.03	0.0	0.01	0.0	0.0	0.15	0.0	0.0	0.01	0.01	0.03	0.0	0.01	0.05	0.0	0.0	0.0	0.0	0.0	0.01	0.01	0.03	0.0	0.0	0.0	0.04	0.0	0.0
PAS4_180618_451_A01	0.02	0.0	0.0	0.03	0.0	0.0	0.0	0.0	0.0	0.0	0.0	0.01	0.01	0.0	0.0	0.14	0.0	0.0	0.09	0.0	0.0	0.09	0.03	0.0	0.02	0.07	0.18	0.17	0.09	0.0	0.0	0.0	0.0	0.0	0.0	0.0	0.0	0.0	0.0	0.0	0.0	0.0	0.0	0.0	0.0	0.0	0.0	0.0	0.0
PAS4_190703_454_A01	0.0	0.0	0.0	0.0	0.0	0.0	0.0	0.0	0.0	0.0	0.0	0.0	0.0	0.0	0.0	0.01	0.0	0.0	0.2	0.02	0.0	0.17	0.09	0.01	0.0	0.01	0.27	0.22	0.0	0.0	0.0	0.0	0.0	0.0	0.0	0.0	0.0	0.0	0.0	0.0	0.0	0.0	0.0	0.0	0.0	0.0	0.0	0.0	0.0
P9S4_180423_402_A01	0.0	0.0	0.0	0.01	0.02	0.0	0.0	0.0	0.0	0.0	0.04	0.0	0.06	0.0	0.0	0.09	0.05	0.0	0.0	0.0	0.0	0.0	0.0	0.0	0.0	0.15	0.01	0.0	0.0	0.0	0.03	0.0	0.01	0.02	0.03	0.01	0.01	0.0	0.0	0.03	0.0	0.0	0.03	0.0	0.0	0.02	0.02	0.02	0.01
P8S4_180402_352_A01	0.0	0.03	0.03	0.08	0.0	0.0	0.0	0.0	0.0	0.0	0.01	0.0	0.04	0.0	0.1	0.06	0.07	0.0	0.0	0.0	0.0	0.0	0.0	0.0	0.0	0.18	0.0	0.0	0.0	0.0	0.0	0.0	0.0	0.0	0.0	0.0	0.0	0.0	0.0	0.0	0.0	0.01	0.0	0.0	0.0	0.0	0.0	0.0	0.0
P8S4_190226_352_A01	0.0	0.0	0.0	0.0	0.0	0.0	0.0	0.0	0.0	0.0	0.0	0.0	0.0	0.02	0.27	0.02	0.0	0.0	0.03	0.0	0.0	0.04	0.39	0.03	0.0	0.0	0.05	0.12	0.0	0.0	0.01	0.0	0.0	0.0	0.0	0.0	0.0	0.0	0.0	0.0	0.0	0.0	0.0	0.0	0.0	0.0	0.0	0.01	0.0
PFS4_180817_701_A01	0.14	0.0	0.02	0.0	0.0	0.0	0.0	0.04	0.0	0.0	0.12	0.08	0.02	0.0	0.0	0.0	0.0	0.0	0.0	0.0	0.0	0.31	0.03	0.03	0.0	0.05	0.04	0.05	0.05	0.0	0.0	0.0	0.0	0.0	0.0	0.0	0.0	0.0	0.0	0.0	0.0	0.0	0.0	0.0	0.0	0.0	0.0	0.0	0.0
PAS4_180425_454_A01	0.29	0.0	0.0	0.02	0.0	0.0	0.0	0.0	0.01	0.0	0.0	0.0	0.0	0.0	0.0	0.09	0.03	0.0	0.0	0.0	0.34	0.16	0.0	0.0	0.02	0.04	0.0	0.0	0.0	0.0	0.0	0.0	0.0	0.0	0.0	0.0	0.0	0.0	0.0	0.0	0.0	0.0	0.0	0.0	0.0	0.0	0.0	0.0	0.0
P8S4_171010_354_A01	0.0	0.0	0.0	0.0	0.0	0.0	0.0	0.0	0.0	0.0	0.0	0.0	0.0	0.0	0.0	0.0	0.0	0.0	0.0	0.0	0.48	0.24	0.23	0.03	0.0	0.0	0.0	0.0	0.0	0.0	0.0	0.0	0.0	0.0	0.0	0.0	0.0	0.0	0.0	0.0	0.0	0.0	0.0	0.0	0.0	0.0	0.0	0.0	0.0
PAS4_190702_456_A01	0.0	0.0	0.0	0.0	0.0	0.0	0.0	0.0	0.0	0.0	0.0	0.0	0.0	0.0	0.0	0.0	0.0	0.0	0.04	0.42	0.5	0.01	0.0	0.0	0.03	0.0	0.0	0.0	0.0	0.0	0.0	0.0	0.0	0.0	0.0	0.0	0.0	0.0	0.0	0.0	0.0	0.0	0.0	0.0	0.0	0.0	0.0	0.0	0.0
P8S4_180817_361_A01	0.01	0.0	0.01	0.0	0.0	0.0	0.0	0.0	0.0	0.0	0.0	0.01	0.0	0.0	0.0	0.05	0.0	0.06	0.02	0.01	0.54	0.28	0.0	0.0	0.0	0.0	0.0	0.0	0.01	0.0	0.0	0.0	0.0	0.0	0.0	0.0	0.0	0.0	0.0	0.0	0.0	0.0	0.0	0.0	0.0	0.0	0.0	0.0	0.0
PAS4_180514_451_A01	0.0	0.0	0.02	0.02	0.0	0.0	0.03	0.0	0.0	0.0	0.01	0.0	0.0	0.01	0.02	0.0	0.0	0.0	0.1	0.12	0.1	0.1	0.03	0.03	0.0	0.0	0.01	0.02	0.02	0.0	0.01	0.0	0.0	0.0	0.02	0.03	0.0	0.02	0.0	0.0	0.0	0.0	0.0	0.01	0.0	0.0	0.0	0.0	0.02
P9S4_180109_402_A01	0.0	0.0	0.0	0.0	0.0	0.0	0.0	0.0	0.0	0.0	0.0	0.0	0.0	0.0	0.0	0.0	0.01	0.11	0.03	0.16	0.07	0.0	0.0	0.0	0.0	0.01	0.0	0.0	0.01	0.0	0.0	0.01	0.0	0.0	0.0	0.01	0.0	0.0	0.0	0.0	0.0	0.0	0.0	0.0	0.0	0.0	0.0	0.0	0.0
P1S4_180813_002_A01	0.0	0.0	0.0	0.0	0.0	0.0	0.0	0.0	0.0	0.0	0.0	0.0	0.0	0.0	0.0	0.01	0.0	0.0	0.01	0.32	0.26	0.01	0.24	0.14	0.01	0.0	0.0	0.0	0.0	0.0	0.0	0.0	0.0	0.0	0.0	0.0	0.0	0.0	0.0	0.0	0.0	0.0	0.0	0.0	0.0	0.0	0.0	0.0	0.0
P8S4_180409_356_A01	0.0	0.0	0.0	0.0	0.0	0.0	0.0	0.0	0.0	0.0	0.0	0.0	0.0	0.0	0.0	0.23	0.0	0.0	0.03	0.45	0.22	0.0	0.0	0.0	0.0	0.0	0.0	0.0	0.0	0.0	0.0	0.0	0.01	0.0	0.0	0.01	0.0	0.0	0.0	0.0	0.0	0.0	0.0	0.0	0.0	0.0	0.01	0.0	0.0
PAS4_180130_451_A01	0.0	0.0	0.0	0.0	0.0	0.0	0.0	0.0	0.0	0.0	0.0	0.0	0.0	0.0	0.0	0.0	0.0	0.0	0.07	0.93	0.0	0.0	0.0	0.0	0.0	0.0	0.0	0.0	0.0	0.0	0.0	0.0	0.0	0.0	0.0	0.0	0.0	0.0	0.0	0.0	0.0	0.0	0.0	0.0	0.0	0.0	0.0	0.0	0.0
PBS4_180604_506_A01	0.0	0.0	0.0	0.0	0.0	0.0	0.12	0.0	0.0	0.05	0.07	0.07	0.0	0.0	0.0	0.0	0.02	0.0	0.13	0.03	0.0	0.0	0.0	0.0	0.0	0.05	0.0	0.0	0.0	0.0	0.02	0.0	0.01	0.02	0.01	0.05	0.0	0.01	0.0	0.05	0.0	0.0	0.02	0.0	0.0	0.0	0.01	0.0	0.03
P8S4_180627_355_A01	0.0	0.0	0.0	0.0	0.0	0.0	0.0	0.0	0.0	0.0	0.0	0.0	0.0	0.0	0.0	0.07	0.0	0.0	0.24	0.12	0.0	0.18	0.13	0.01	0.11	0.06	0.06	0.02	0.0	0.0	0.0	0.0	0.0	0.0	0.0	0.0	0.0	0.0	0.0	0.0	0.0	0.0	0.0	0.0	0.0	0.0	0.0	0.0	0.0
PBS4_180205_504_A01	0.0	0.0	0.0	0.0	0.0	0.0	0.0	0.0	0.0	0.0	0.0	0.0	0.0	0.0	0.0	0.03	0.25	0.01	0.37	0.04	0.04	0.15	0.04	0.05	0.0	0.0	0.0	0.01	0.0	0.0	0.0	0.0	0.0	0.0	0.0	0.0	0.0	0.0	0.0	0.0	0.0	0.0	0.0	0.0	0.0	0.0	0.0	0.0	0.0
P9S4_171206_401_A01	0.0	0.02	0.0	0.07	0.0	0.0	0.0	0.0	0.0	0.0	0.03	0.0	0.01	0.0	0.0	0.0	0.13	0.0	0.0	0.01	0.01	0.0	0.01	0.0	0.0	0.01	0.0	0.0	0.0	0.0	0.02	0.0	0.03	0.0	0.01	0.02	0.0	0.01	0.0	0.0	0.01	0.0	0.04	0.0	0.01	0.02	0.0	0.0	0.01
PAS4_180110_453_A01	0.01	0.01	0.1	0.11	0.0	0.0	0.02	0.0	0.0	0.0	0.1	0.09	0.05	0.16	0.09	0.0	0.17	0.0	0.0	0.0	0.03	0.02	0.0	0.0	0.0	0.04	0.0	0.0	0.0	0.0	0.0	0.0	0.0	0.0	0.0	0.0	0.0	0.0	0.0	0.0	0.0	0.0	0.0	0.0	0.0	0.0	0.0	0.0	0.0
PAS4_180718_454_A01	0.0	0.0	0.0	0.03	0.0	0.0	0.0	0.0	0.0	0.0	0.0	0.0	0.08	0.0	0.02	0.11	0.0	0.0	0.01	0.0	0.03	0.04	0.01	0.03	0.0	0.02	0.0	0.0	0.0	0.0	0.0	0.0	0.01	0.0	0.01	0.0	0.01	0.0	0.0	0.0	0.0	0.0	0.01	0.0	0.01	0.0	0.0	0.02	0.0
P8S4_191126_351_A01	0.0	0.0	0.0	0.1	0.01	0.0	0.0	0.0	0.0	0.0	0.0	0.0	0.04	0.0	0.0	0.15	0.0	0.03	0.0	0.0	0.05	0.01	0.04	0.0	0.0	0.08	0.0	0.0	0.0	0.0	0.0	0.0	0.02	0.03	0.02	0.02	0.0	0.05	0.0	0.0	0.01	0.0	0.0	0.01	0.01	0.0	0.0	0.0	0.02
P9S4_171208_402_A01	0.0	0.0	0.0	0.07	0.0	0.02	0.02	0.0	0.0	0.0	0.08	0.0	0.06	0.0	0.0	0.17	0.04	0.0	0.0	0.0	0.0	0.0	0.01	0.0	0.0	0.07	0.0	0.0	0.0	0.0	0.02	0.03	0.04	0.01	0.01	0.02	0.02	0.04	0.0	0.0	0.05	0.02	0.04	0.04	0.04	0.0	0.0	0.0	0.05
PAS4_181217_454_A01	0.0	0.0	0.0	0.0	0.0	0.0	0.0	0.0	0.0	0.0	0.0	0.0	0.0	0.0	0.0	0.2	0.0	0.0	0.0	0.0	0.03	0.18	0.06	0.14	0.0	0.0	0.0	0.0	0.01	0.0	0.0	0.0	0.0	0.0	0.0	0.0	0.0	0.0	0.0	0.0	0.0	0.0	0.0	0.0	0.0	0.0	0.0	0.0	0.0
P9S4_171114_405_A01	0.0	0.0	0.0	0.0	0.0	0.0	0.0	0.0	0.0	0.0	0.0	0.19	0.05	0.0	0.0	0.2	0.01	0.13	0.0	0.0	0.19	0.09	0.11	0.01	0.01	0.01	0.0	0.0	0.0	0.0	0.0	0.0	0.0	0.0	0.0	0.0	0.0	0.0	0.0	0.0	0.0	0.0	0.0	0.0	0.0	0.0	0.0	0.0	0.0
P9S4_171020_401_A01	0.0	0.0	0.1	0.14	0.0	0.0	0.0	0.0	0.0	0.0	0.17	0.0	0.0	0.0	0.0	0.21	0.01	0.02	0.01	0.0	0.03	0.02	0.0	0.04	0.04	0.0	0.0	0.0	0.0	0.0	0.0	0.01	0.02	0.0	0.01	0.0	0.0	0.02	0.0	0.01	0.0	0.0	0.02	0.0	0.0	0.0	0.0	0.0	0.01
P8S4_180205_351_A01	0.0	0.0	0.0	0.0	0.02	0.02	0.01	0.01	0.0	0.0	0.01	0.0	0.01	0.0	0.03	0.22	0.0	0.0	0.0	0.0	0.0	0.0	0.05	0.1	0.0	0.01	0.0	0.0	0.0	0.0	0.0	0.04	0.06	0.02	0.05	0.08	0.0	0.1	0.0	0.0	0.0	0.0	0.0	0.0	0.01	0.02	0.0	0.08	0.0
P8S4_180330_352_A01	0.0	0.0	0.0	0.0	0.0	0.0	0.0	0.0	0.0	0.0	0.0	0.0	0.0	0.16	0.0	0.23	0.02	0.01	0.0	0.0	0.17	0.15	0.03	0.05	0.0	0.01	0.0	0.01	0.0	0.0	0.0	0.0	0.0	0.0	0.0	0.0	0.0	0.0	0.0	0.0	0.0	0.0	0.0	0.0	0.0	0.0	0.0	0.0	0.0
PBS4_180410_501_A01	0.1	0.01	0.01	0.1	0.0	0.0	0.0	0.0	0.0	0.0	0.0	0.0	0.24	0.0	0.0	0.29	0.0	0.0	0.0	0.0	0.0	0.0	0.18	0.02	0.0	0.05	0.0	0.0	0.0	0.0	0.0	0.0	0.0	0.0	0.0	0.0	0.0	0.0	0.0	0.0	0.0	0.0	0.0	0.0	0.0	0.0	0.0	0.0	0.0
PBS4_180227_502_A01	0.01	0.0	0.0	0.01	0.0	0.0	0.0	0.0	0.01	0.0	0.01	0.0	0.0	0.03	0.0	0.34	0.03	0.0	0.0	0.0	0.0	0.06	0.06	0.0	0.05	0.14	0.0	0.0	0.0	0.0	0.0	0.01	0.0	0.01	0.0	0.0	0.0	0.02	0.0	0.0	0.01	0.02	0.0	0.0	0.0	0.02	0.01	0.0	0.0
P8S4_180402_355_A01	0.0	0.0	0.0	0.0	0.0	0.0	0.0	0.0	0.0	0.0	0.0	0.0	0.0	0.0	0.0	0.34	0.0	0.0	0.33	0.03	0.0	0.08	0.04	0.04	0.1	0.04	0.0	0.0	0.0	0.0	0.0	0.0	0.0	0.0	0.0	0.0	0.0	0.0	0.0	0.0	0.0	0.0	0.0	0.0	0.0	0.0	0.0	0.0	0.0
P2S4_171113_054_A01	0.0	0.0	0.0	0.0	0.0	0.0	0.0	0.0	0.0	0.0	0.0	0.0	0.0	0.0	0.0	0.38	0.1	0.01	0.0	0.0	0.02	0.0	0.23	0.26	0.0	0.0	0.0	0.0	0.0	0.0	0.0	0.0	0.0	0.0	0.0	0.0	0.0	0.0	0.0	0.0	0.0	0.0	0.0	0.0	0.0	0.0	0.0	0.0	0.0
P8S4_180228_355_A01	0.0	0.0	0.0	0.0	0.0	0.0	0.0	0.0	0.0	0.0	0.0	0.0	0.0	0.0	0.0	0.47	0.0	0.0	0.01	0.0	0.0	0.27	0.14	0.09	0.0	0.0	0.0	0.0	0.0	0.0	0.0	0.0	0.0	0.0	0.0	0.0	0.0	0.0	0.0	0.0	0.0	0.0	0.0	0.0	0.0	0.0	0.0	0.0	0.0
P1S4_190301_002_A01	0.0	0.0	0.0	0.0	0.0	0.0	0.0	0.0	0.0	0.0	0.0	0.0	0.0	0.08	0.0	0.53	0.0	0.0	0.0	0.0	0.07	0.09	0.1	0.06	0.0	0.07	0.0	0.0	0.0	0.0	0.0	0.0	0.0	0.0	0.0	0.0	0.0	0.0	0.0	0.0	0.0	0.0	0.0	0.0	0.0	0.0	0.0	0.0	0.0
PBS4_171003_504_A01	0.0	0.0	0.01	0.05	0.02	0.07	0.0	0.0	0.02	0.0	0.02	0.05	0.0	0.01	0.08	0.0	0.0	0.0	0.03	0.04	0.04	0.0	0.0	0.0	0.01	0.04	0.0	0.01	0.0	0.04	0.0	0.02	0.04	0.03	0.04	0.01	0.01	0.0	0.0	0.0	0.0	0.0	0.01	0.03	0.0	0.0	0.03	0.0	0.0
P2S4_180312_051_A01	0.03	0.0	0.0	0.07	0.08	0.0	0.0	0.01	0.0	0.0	0.01	0.0	0.07	0.01	0.14	0.0	0.0	0.0	0.0	0.0	0.0	0.01	0.0	0.0	0.0	0.0	0.01	0.0	0.0	0.0	0.02	0.0	0.0	0.0	0.01	0.0	0.0	0.05	0.0	0.0	0.0	0.0	0.03	0.05	0.0	0.0	0.02	0.0	0.0
PAS4_190926_452_A01	0.08	0.04	0.05	0.0	0.0	0.0	0.0	0.0	0.05	0.0	0.02	0.02	0.05	0.0	0.17	0.0	0.0	0.0	0.0	0.0	0.0	0.0	0.0	0.0	0.0	0.0	0.0	0.0	0.0	0.0	0.0	0.05	0.04	0.01	0.0	0.02	0.0	0.03	0.01	0.0	0.02	0.0	0.04	0.0	0.01	0.0	0.01	0.0	0.01
PAS4_180509_452_A01	0.0	0.0	0.01	0.0	0.0	0.0	0.0	0.0	0.0	0.0	0.0	0.0	0.0	0.02	0.21	0.02	0.0	0.0	0.0	0.0	0.0	0.02	0.0	0.0	0.0	0.02	0.03	0.08	0.0	0.0	0.0	0.0	0.01	0.0	0.0	0.0	0.0	0.0	0.0	0.0	0.0	0.0	0.0	0.0	0.0	0.0	0.0	0.0	0.0
P9S4_180409_407_A01	0.0	0.0	0.0	0.09	0.02	0.01	0.0	0.0	0.0	0.0	0.01	0.0	0.02	0.0	0.22	0.06	0.0	0.0	0.0	0.0	0.03	0.03	0.0	0.0	0.01	0.01	0.0	0.0	0.0	0.0	0.0	0.01	0.02	0.02	0.0	0.02	0.0	0.0	0.0	0.0	0.0	0.0	0.01	0.02	0.0	0.0	0.0	0.0	0.01
P8S4_171114_355_A01	0.0	0.0	0.0	0.0	0.0	0.0	0.0	0.0	0.0	0.0	0.01	0.0	0.12	0.01	0.23	0.17	0.08	0.0	0.0	0.0	0.19	0.0	0.17	0.01	0.0	0.01	0.0	0.0	0.0	0.0	0.0	0.0	0.0	0.0	0.0	0.0	0.0	0.0	0.0	0.0	0.0	0.0	0.0	0.0	0.0	0.0	0.0	0.0	0.0
PBS4_180817_505_A01	0.0	0.0	0.0	0.0	0.0	0.0	0.0	0.0	0.0	0.0	0.0	0.0	0.0	0.22	0.34	0.15	0.0	0.0	0.0	0.0	0.15	0.13	0.0	0.0	0.0	0.0	0.01	0.0	0.0	0.0	0.0	0.0	0.0	0.0	0.0	0.0	0.0	0.0	0.0	0.0	0.0	0.0	0.0	0.0	0.0	0.0	0.0	0.0	0.0
PAS4_180307_451_A01	0.05	0.0	0.0	0.36	0.0	0.0	0.0	0.0	0.0	0.0	0.0	0.0	0.0	0.04	0.47	0.04	0.0	0.0	0.0	0.0	0.0	0.0	0.01	0.0	0.0	0.02	0.0	0.01	0.0	0.0	0.0	0.0	0.0	0.0	0.0	0.0	0.0	0.0	0.0	0.0	0.0	0.0	0.0	0.0	0.0	0.0	0.0	0.0	0.0
P2S4_180730_054_A01	0.0	0.0	0.0	0.0	0.0	0.0	0.01	0.0	0.07	0.0	0.07	0.08	0.0	0.12	0.0	0.03	0.0	0.0	0.0	0.0	0.0	0.01	0.0	0.0	0.0	0.0	0.0	0.0	0.09	0.0	0.02	0.03	0.05	0.04	0.03	0.05	0.06	0.0	0.0	0.08	0.0	0.0	0.06	0.02	0.02	0.01	0.05	0.0	0.0
P2S4_180108_055_A01	0.01	0.06	0.06	0.02	0.0	0.0	0.0	0.01	0.0	0.0	0.06	0.04	0.02	0.12	0.06	0.0	0.0	0.0	0.06	0.0	0.0	0.0	0.0	0.0	0.0	0.0	0.0	0.04	0.02	0.01	0.0	0.0	0.05	0.02	0.03	0.02	0.01	0.0	0.0	0.02	0.0	0.02	0.05	0.0	0.01	0.0	0.06	0.0	0.0
P8S4_180509_354_A01	0.12	0.0	0.0	0.04	0.0	0.0	0.0	0.0	0.0	0.0	0.1	0.02	0.11	0.14	0.0	0.01	0.04	0.0	0.0	0.0	0.0	0.0	0.0	0.0	0.0	0.07	0.01	0.11	0.01	0.0	0.0	0.02	0.03	0.0	0.0	0.0	0.0	0.0	0.0	0.0	0.02	0.0	0.0	0.0	0.0	0.0	0.01	0.0	0.0
P1S4_190701_008_A01	0.01	0.0	0.06	0.02	0.02	0.02	0.11	0.02	0.0	0.0	0.03	0.01	0.04	0.15	0.0	0.02	0.0	0.0	0.0	0.04	0.0	0.02	0.0	0.0	0.01	0.0	0.01	0.0	0.01	0.0	0.01	0.0	0.0	0.0	0.0	0.0	0.0	0.0	0.0	0.0	0.0	0.0	0.0	0.01	0.0	0.0	0.0	0.0	0.0
P9S4_180125_401_A01	0.0	0.0	0.01	0.06	0.0	0.0	0.0	0.0	0.09	0.02	0.02	0.04	0.11	0.16	0.0	0.0	0.0	0.0	0.0	0.0	0.0	0.09	0.03	0.01	0.01	0.06	0.0	0.0	0.0	0.0	0.0	0.01	0.02	0.0	0.01	0.03	0.0	0.02	0.0	0.01	0.0	0.0	0.03	0.0	0.0	0.01	0.01	0.02	0.0
P2S4_180305_054_A01	0.0	0.0	0.0	0.11	0.01	0.0	0.14	0.0	0.0	0.02	0.05	0.08	0.02	0.17	0.1	0.02	0.06	0.0	0.0	0.0	0.0	0.0	0.0	0.0	0.05	0.04	0.07	0.05	0.01	0.0	0.0	0.0	0.0	0.0	0.0	0.0	0.0	0.0	0.0	0.0	0.0	0.0	0.0	0.0	0.0	0.0	0.0	0.0	0.0
PBS4_171027_504_A01	0.01	0.02	0.0	0.15	0.02	0.0	0.01	0.0	0.02	0.0	0.11	0.0	0.12	0.17	0.0	0.03	0.03	0.0	0.0	0.0	0.0	0.03	0.0	0.01	0.0	0.01	0.0	0.0	0.01	0.0	0.0	0.02	0.02	0.01	0.0	0.0	0.0	0.03	0.0	0.0	0.0	0.0	0.0	0.01	0.0	0.0	0.0	0.0	0.01
PBS4_181002_505_A01	0.0	0.0	0.0	0.0	0.0	0.0	0.0	0.1	0.0	0.0	0.12	0.0	0.12	0.2	0.01	0.0	0.0	0.0	0.01	0.0	0.0	0.0	0.0	0.01	0.0	0.0	0.07	0.0	0.03	0.0	0.0	0.0	0.0	0.0	0.0	0.0	0.0	0.0	0.0	0.0	0.0	0.0	0.0	0.0	0.0	0.0	0.0	0.0	0.0
P9S4_180124_401_A01	0.0	0.0	0.0	0.0	0.0	0.0	0.0	0.02	0.0	0.0	0.18	0.0	0.05	0.24	0.03	0.01	0.0	0.0	0.0	0.0	0.0	0.0	0.0	0.0	0.0	0.0	0.0	0.0	0.02	0.0	0.01	0.02	0.03	0.02	0.01	0.02	0.0	0.0	0.0	0.02	0.0	0.0	0.03	0.0	0.0	0.01	0.0	0.0	0.0
PAS4_180307_452_A01	0.0	0.04	0.03	0.06	0.02	0.0	0.0	0.0	0.0	0.0	0.0	0.0	0.0	0.34	0.11	0.12	0.0	0.0	0.0	0.0	0.0	0.0	0.01	0.0	0.03	0.03	0.03	0.08	0.09	0.0	0.0	0.0	0.0	0.0	0.0	0.0	0.0	0.0	0.0	0.0	0.0	0.0	0.01	0.0	0.0	0.0	0.0	0.0	0.0
P1S4_180403_001_A01	0.0	0.0	0.0	0.0	0.0	0.0	0.0	0.0	0.0	0.0	0.0	0.0	0.0	0.36	0.02	0.04	0.0	0.03	0.0	0.0	0.03	0.01	0.0	0.0	0.0	0.06	0.1	0.07	0.0	0.0	0.0	0.0	0.0	0.0	0.0	0.0	0.0	0.0	0.0	0.0	0.0	0.0	0.0	0.0	0.0	0.0	0.0	0.0	0.0
P1S4_180906_002_A01	0.0	0.0	0.0	0.0	0.0	0.0	0.0	0.0	0.0	0.0	0.0	0.0	0.0	0.7	0.0	0.0	0.0	0.0	0.0	0.0	0.0	0.0	0.0	0.0	0.0	0.0	0.3	0.0	0.0	0.0	0.0	0.0	0.0	0.0	0.0	0.0	0.0	0.0	0.0	0.0	0.0	0.0	0.0	0.0	0.0	0.0	0.0	0.0	0.0
PBS4_180403_507_A01	0.02	0.0	0.01	0.04	0.0	0.06	0.0	0.0	0.0	0.0	0.0	0.0	0.12	0.0	0.0	0.0	0.0	0.0	0.0	0.0	0.0	0.0	0.0	0.0	0.0	0.0	0.0	0.0	0.0	0.0	0.0	0.02	0.01	0.0	0.0	0.0	0.01	0.01	0.0	0.03	0.02	0.0	0.03	0.01	0.03	0.01	0.02	0.0	0.01
PBS4_171107_505_A01	0.04	0.0	0.0	0.0	0.0	0.0	0.0	0.0	0.0	0.0	0.03	0.09	0.12	0.03	0.03	0.06	0.02	0.0	0.0	0.0	0.0	0.01	0.01	0.01	0.01	0.0	0.0	0.0	0.0	0.0	0.01	0.04	0.03	0.01	0.02	0.0	0.0	0.0	0.0	0.0	0.01	0.0	0.05	0.03	0.0	0.0	0.01	0.0	0.06
PBS4_180523_507_A01	0.0	0.0	0.0	0.0	0.0	0.0	0.0	0.0	0.0	0.0	0.0	0.11	0.14	0.0	0.0	0.08	0.01	0.0	0.0	0.0	0.0	0.02	0.0	0.0	0.02	0.05	0.02	0.03	0.03	0.03	0.0	0.02	0.01	0.03	0.0	0.07	0.01	0.0	0.01	0.02	0.01	0.0	0.04	0.02	0.0	0.02	0.01	0.0	0.0
PAS4_180206_454_A01	0.0	0.0	0.0	0.0	0.0	0.0	0.0	0.04	0.12	0.0	0.13	0.0	0.15	0.0	0.02	0.05	0.0	0.0	0.12	0.0	0.0	0.02	0.01	0.02	0.0	0.0	0.02	0.15	0.15	0.0	0.0	0.0	0.0	0.0	0.0	0.0	0.0	0.0	0.0	0.0	0.0	0.0	0.0	0.0	0.0	0.0	0.0	0.0	0.0
P8S4_171107_352_A01	0.0	0.0	0.0	0.0	0.0	0.0	0.0	0.06	0.0	0.0	0.01	0.0	0.15	0.0	0.0	0.0	0.01	0.0	0.0	0.0	0.01	0.0	0.01	0.0	0.0	0.0	0.0	0.12	0.01	0.0	0.0	0.0	0.0	0.0	0.0	0.0	0.0	0.0	0.0	0.0	0.0	0.0	0.0	0.0	0.0	0.0	0.0	0.0	0.0
P8S4_191101_352_A01	0.0	0.0	0.0	0.0	0.0	0.0	0.0	0.0	0.0	0.0	0.15	0.02	0.16	0.02	0.05	0.0	0.0	0.0	0.0	0.0	0.0	0.0	0.0	0.01	0.0	0.01	0.01	0.02	0.0	0.01	0.0	0.0	0.01	0.0	0.0	0.0	0.0	0.0	0.0	0.0	0.01	0.0	0.0	0.01	0.0	0.0	0.0	0.0	0.0
P9S4_171003_410_A01	0.0	0.0	0.0	0.0	0.0	0.0	0.0	0.0	0.02	0.01	0.01	0.0	0.16	0.0	0.0	0.0	0.08	0.0	0.04	0.0	0.0	0.0	0.0	0.0	0.0	0.07	0.0	0.01	0.11	0.0	0.0	0.0	0.0	0.0	0.0	0.01	0.0	0.0	0.0	0.0	0.0	0.0	0.0	0.0	0.0	0.0	0.0	0.0	0.0
P1S4_190130_003_A01	0.11	0.0	0.0	0.01	0.0	0.0	0.01	0.0	0.0	0.0	0.0	0.0	0.16	0.0	0.0	0.0	0.0	0.0	0.0	0.0	0.0	0.01	0.04	0.08	0.0	0.16	0.0	0.0	0.0	0.0	0.0	0.0	0.0	0.0	0.0	0.0	0.0	0.0	0.0	0.0	0.0	0.0	0.0	0.0	0.0	0.0	0.07	0.01	0.0
P9S4_180207_407_A01	0.08	0.0	0.0	0.06	0.04	0.0	0.0	0.0	0.0	0.0	0.09	0.0	0.17	0.01	0.0	0.17	0.05	0.0	0.0	0.0	0.0	0.07	0.02	0.01	0.05	0.05	0.0	0.0	0.0	0.0	0.0	0.0	0.03	0.0	0.0	0.0	0.0	0.0	0.0	0.0	0.0	0.0	0.0	0.01	0.0	0.0	0.01	0.0	0.0
P2S4_171018_054_A01	0.04	0.16	0.05	0.04	0.0	0.0	0.0	0.0	0.0	0.0	0.15	0.0	0.17	0.17	0.07	0.09	0.0	0.0	0.0	0.0	0.0	0.0	0.0	0.01	0.0	0.03	0.0	0.0	0.0	0.0	0.0	0.0	0.0	0.0	0.0	0.0	0.0	0.0	0.0	0.0	0.0	0.0	0.0	0.0	0.0	0.0	0.0	0.0	0.0
P1S4_190104_005_A01	0.0	0.0	0.02	0.0	0.05	0.05	0.0	0.0	0.0	0.0	0.0	0.0	0.17	0.0	0.0	0.0	0.0	0.0	0.0	0.0	0.0	0.0	0.0	0.0	0.0	0.0	0.0	0.0	0.0	0.0	0.04	0.08	0.06	0.07	0.1	0.06	0.0	0.0	0.0	0.0	0.0	0.0	0.0	0.03	0.01	0.02	0.0	0.0	0.0
P8S4_180620_351_A01	0.01	0.0	0.0	0.01	0.06	0.07	0.0	0.0	0.0	0.0	0.0	0.0	0.17	0.0	0.0	0.0	0.1	0.03	0.0	0.0	0.0	0.0	0.0	0.0	0.0	0.0	0.0	0.0	0.02	0.0	0.04	0.0	0.02	0.01	0.03	0.05	0.05	0.0	0.0	0.05	0.0	0.02	0.01	0.0	0.0	0.02	0.05	0.0	0.0
P8S4_180306_352_A01	0.01	0.0	0.0	0.01	0.0	0.03	0.0	0.0	0.0	0.0	0.12	0.0	0.18	0.0	0.0	0.0	0.0	0.0	0.0	0.0	0.0	0.01	0.0	0.01	0.0	0.02	0.02	0.01	0.0	0.0	0.0	0.0	0.0	0.0	0.0	0.0	0.0	0.0	0.0	0.0	0.0	0.0	0.0	0.0	0.0	0.01	0.0	0.0	0.0
P8S4_171010_356_A01	0.12	0.0	0.07	0.02	0.04	0.12	0.1	0.06	0.0	0.0	0.15	0.0	0.18	0.0	0.0	0.0	0.0	0.0	0.0	0.0	0.0	0.0	0.0	0.0	0.0	0.0	0.0	0.0	0.0	0.0	0.0	0.0	0.0	0.0	0.0	0.0	0.0	0.0	0.0	0.0	0.0	0.0	0.0	0.0	0.0	0.0	0.0	0.0	0.0
P8S4_180111_351_A01	0.0	0.06	0.0	0.0	0.0	0.03	0.01	0.0	0.0	0.0	0.0	0.14	0.18	0.0	0.02	0.0	0.0	0.0	0.0	0.01	0.0	0.01	0.0	0.0	0.0	0.0	0.0	0.03	0.01	0.0	0.0	0.0	0.0	0.0	0.0	0.0	0.0	0.0	0.0	0.0	0.01	0.0	0.0	0.0	0.0	0.0	0.0	0.0	0.0
P1S4_190326_002_A01	0.0	0.0	0.0	0.0	0.0	0.01	0.0	0.0	0.0	0.0	0.0	0.01	0.18	0.0	0.0	0.09	0.0	0.0	0.0	0.0	0.0	0.0	0.03	0.01	0.02	0.01	0.01	0.03	0.03	0.0	0.01	0.03	0.02	0.0	0.01	0.02	0.01	0.0	0.0	0.03	0.0	0.0	0.02	0.02	0.01	0.01	0.0	0.0	0.0
P1S4_180611_001_A01	0.07	0.0	0.0	0.02	0.0	0.07	0.02	0.0	0.0	0.0	0.01	0.0	0.18	0.0	0.0	0.01	0.0	0.0	0.0	0.0	0.0	0.0	0.0	0.0	0.0	0.0	0.0	0.0	0.0	0.0	0.0	0.05	0.03	0.04	0.02	0.04	0.03	0.0	0.02	0.03	0.02	0.0	0.01	0.04	0.01	0.0	0.01	0.0	0.0
PAS4_180724_455_A01	0.0	0.0	0.0	0.0	0.0	0.0	0.0	0.05	0.0	0.0	0.02	0.0	0.18	0.06	0.01	0.01	0.0	0.0	0.01	0.04	0.02	0.0	0.0	0.01	0.0	0.01	0.02	0.03	0.0	0.02	0.01	0.02	0.05	0.0	0.03	0.02	0.02	0.0	0.03	0.04	0.0	0.0	0.03	0.01	0.02	0.02	0.0	0.04	0.0
P1S4_190214_001_A01	0.0	0.0	0.0	0.0	0.0	0.0	0.0	0.01	0.0	0.0	0.02	0.04	0.2	0.0	0.0	0.03	0.0	0.0	0.01	0.0	0.01	0.0	0.0	0.0	0.0	0.02	0.04	0.06	0.02	0.0	0.0	0.0	0.0	0.0	0.0	0.0	0.0	0.0	0.0	0.0	0.0	0.0	0.0	0.0	0.0	0.01	0.0	0.0	0.0
PAS4_180125_452_A01	0.0	0.01	0.02	0.01	0.04	0.03	0.05	0.0	0.0	0.0	0.0	0.0	0.21	0.03	0.01	0.02	0.0	0.0	0.03	0.0	0.0	0.0	0.0	0.0	0.0	0.0	0.0	0.06	0.0	0.0	0.01	0.01	0.0	0.01	0.01	0.01	0.0	0.0	0.0	0.0	0.0	0.0	0.02	0.03	0.02	0.0	0.03	0.01	0.01
P9S4_180416_406_A01	0.03	0.04	0.02	0.0	0.01	0.07	0.04	0.0	0.05	0.0	0.03	0.0	0.21	0.0	0.0	0.0	0.0	0.0	0.0	0.0	0.0	0.0	0.0	0.0	0.0	0.0	0.0	0.0	0.0	0.0	0.0	0.0	0.0	0.0	0.0	0.0	0.0	0.0	0.0	0.0	0.0	0.0	0.0	0.0	0.0	0.0	0.0	0.0	0.0
P9S4_171024_401_A01	0.0	0.0	0.0	0.19	0.0	0.0	0.0	0.0	0.0	0.0	0.0	0.0	0.21	0.0	0.0	0.0	0.0	0.0	0.0	0.0	0.0	0.01	0.0	0.0	0.0	0.0	0.0	0.0	0.13	0.05	0.0	0.02	0.03	0.01	0.02	0.04	0.05	0.0	0.0	0.03	0.0	0.0	0.02	0.0	0.0	0.01	0.04	0.0	0.0
PBS4_180403_504_A01	0.04	0.0	0.0	0.0	0.0	0.0	0.01	0.01	0.0	0.0	0.09	0.0	0.22	0.0	0.0	0.0	0.0	0.0	0.0	0.0	0.0	0.0	0.0	0.0	0.0	0.0	0.01	0.0	0.06	0.0	0.06	0.0	0.0	0.03	0.01	0.04	0.02	0.0	0.02	0.05	0.04	0.0	0.07	0.03	0.0	0.0	0.1	0.0	0.0
P8S4_180221_355_A01	0.01	0.0	0.0	0.0	0.0	0.0	0.0	0.06	0.0	0.0	0.12	0.16	0.22	0.0	0.0	0.0	0.0	0.0	0.0	0.0	0.0	0.0	0.0	0.0	0.0	0.0	0.0	0.0	0.0	0.0	0.0	0.0	0.0	0.0	0.0	0.0	0.01	0.0	0.0	0.02	0.0	0.0	0.0	0.0	0.0	0.0	0.0	0.0	0.0
PAS4_190401_452_A01	0.01	0.0	0.0	0.0	0.0	0.0	0.0	0.0	0.0	0.0	0.22	0.0	0.23	0.0	0.18	0.0	0.0	0.0	0.0	0.0	0.0	0.0	0.03	0.0	0.0	0.0	0.0	0.04	0.06	0.0	0.0	0.0	0.0	0.0	0.0	0.0	0.0	0.0	0.0	0.0	0.0	0.0	0.0	0.0	0.0	0.0	0.0	0.0	0.0
P1S4_180305_003_A01	0.03	0.0	0.0	0.0	0.0	0.0	0.04	0.07	0.0	0.0	0.04	0.0	0.23	0.0	0.0	0.0	0.0	0.0	0.0	0.0	0.0	0.0	0.0	0.0	0.0	0.0	0.01	0.03	0.0	0.01	0.0	0.0	0.0	0.0	0.0	0.0	0.0	0.0	0.0	0.0	0.0	0.0	0.0	0.0	0.0	0.0	0.0	0.0	0.0
PBS4_180514_503_A01	0.22	0.01	0.01	0.1	0.0	0.04	0.0	0.0	0.0	0.0	0.0	0.0	0.24	0.0	0.0	0.06	0.0	0.0	0.02	0.0	0.03	0.0	0.0	0.0	0.0	0.04	0.0	0.1	0.08	0.0	0.0	0.0	0.0	0.0	0.0	0.0	0.0	0.0	0.0	0.0	0.0	0.0	0.0	0.0	0.0	0.0	0.0	0.0	0.0
PAS4_181218_451_A01	0.11	0.0	0.0	0.0	0.0	0.0	0.0	0.0	0.0	0.0	0.1	0.0	0.25	0.0	0.23	0.02	0.01	0.0	0.01	0.0	0.0	0.01	0.01	0.0	0.0	0.0	0.0	0.04	0.0	0.02	0.01	0.0	0.01	0.0	0.0	0.0	0.01	0.0	0.0	0.0	0.02	0.0	0.01	0.01	0.0	0.0	0.0	0.0	0.0
P8S4_180207_355_A01	0.13	0.0	0.0	0.0	0.0	0.0	0.01	0.08	0.0	0.0	0.05	0.0	0.25	0.0	0.0	0.0	0.0	0.0	0.0	0.0	0.0	0.0	0.0	0.0	0.0	0.0	0.0	0.02	0.01	0.0	0.01	0.0	0.01	0.0	0.02	0.03	0.01	0.01	0.01	0.01	0.02	0.0	0.05	0.01	0.0	0.01	0.01	0.0	0.0
P8S4_171006_356_A01	0.03	0.01	0.11	0.0	0.0	0.17	0.04	0.0	0.05	0.09	0.0	0.0	0.26	0.02	0.0	0.0	0.0	0.0	0.01	0.0	0.0	0.0	0.0	0.0	0.0	0.0	0.0	0.0	0.01	0.02	0.0	0.02	0.0	0.01	0.0	0.01	0.0	0.0	0.0	0.0	0.0	0.0	0.0	0.01	0.0	0.0	0.0	0.0	0.0
PBS4_180117_502_A01	0.04	0.0	0.0	0.14	0.11	0.0	0.0	0.0	0.0	0.0	0.0	0.0	0.26	0.01	0.02	0.15	0.0	0.0	0.01	0.09	0.0	0.02	0.04	0.01	0.06	0.0	0.02	0.0	0.0	0.0	0.0	0.0	0.0	0.0	0.0	0.0	0.0	0.0	0.0	0.0	0.0	0.0	0.0	0.0	0.0	0.0	0.0	0.0	0.0
PAS4_180626_452_A01	0.02	0.0	0.05	0.03	0.0	0.0	0.0	0.0	0.0	0.0	0.0	0.0	0.27	0.09	0.0	0.0	0.0	0.0	0.0	0.0	0.0	0.0	0.0	0.0	0.0	0.0	0.0	0.0	0.0	0.0	0.01	0.0	0.01	0.01	0.01	0.01	0.0	0.0	0.0	0.0	0.01	0.0	0.01	0.0	0.0	0.0	0.0	0.0	0.0
P9S4_171020_403_A01	0.13	0.0	0.0	0.05	0.0	0.0	0.0	0.0	0.0	0.0	0.0	0.0	0.29	0.04	0.14	0.05	0.0	0.0	0.0	0.0	0.0	0.01	0.0	0.0	0.06	0.01	0.0	0.0	0.0	0.0	0.0	0.0	0.0	0.0	0.0	0.0	0.0	0.0	0.0	0.0	0.0	0.0	0.0	0.0	0.0	0.0	0.0	0.0	0.0
P9S4_171023_405_A01	0.21	0.0	0.0	0.02	0.22	0.0	0.0	0.09	0.0	0.0	0.14	0.0	0.29	0.0	0.0	0.0	0.0	0.0	0.0	0.0	0.0	0.0	0.0	0.0	0.0	0.0	0.0	0.0	0.0	0.0	0.0	0.0	0.0	0.0	0.0	0.0	0.0	0.0	0.0	0.0	0.0	0.0	0.0	0.0	0.0	0.0	0.0	0.0	0.0
P8S4_180108_352_A01	0.0	0.0	0.0	0.0	0.0	0.02	0.15	0.01	0.0	0.0	0.06	0.0	0.3	0.01	0.01	0.0	0.04	0.02	0.11	0.1	0.06	0.06	0.0	0.0	0.01	0.0	0.01	0.0	0.0	0.0	0.0	0.0	0.0	0.0	0.0	0.0	0.0	0.0	0.0	0.0	0.0	0.0	0.0	0.0	0.0	0.0	0.0	0.0	0.0
PBS4_180409_504_A01	0.0	0.0	0.0	0.0	0.0	0.0	0.0	0.01	0.0	0.0	0.06	0.0	0.3	0.0	0.0	0.19	0.0	0.0	0.0	0.0	0.0	0.11	0.04	0.0	0.0	0.02	0.0	0.01	0.0	0.0	0.02	0.0	0.02	0.01	0.0	0.02	0.0	0.0	0.0	0.0	0.0	0.0	0.0	0.01	0.01	0.0	0.0	0.0	0.0
PES4_180820_651_A01	0.07	0.0	0.0	0.0	0.0	0.0	0.0	0.0	0.0	0.0	0.0	0.02	0.31	0.0	0.0	0.09	0.0	0.0	0.0	0.02	0.0	0.01	0.03	0.0	0.01	0.06	0.09	0.14	0.0	0.0	0.0	0.0	0.0	0.0	0.0	0.0	0.0	0.0	0.0	0.0	0.0	0.0	0.0	0.0	0.0	0.0	0.0	0.0	0.0
P2S4_171018_052_A01	0.04	0.0	0.01	0.0	0.0	0.0	0.0	0.0	0.0	0.0	0.0	0.0	0.31	0.0	0.0	0.0	0.01	0.0	0.01	0.0	0.0	0.0	0.0	0.0	0.01	0.09	0.07	0.02	0.1	0.0	0.0	0.0	0.0	0.0	0.0	0.0	0.0	0.0	0.0	0.0	0.0	0.0	0.01	0.0	0.0	0.0	0.0	0.0	0.0
PAS4_180910_451_A01	0.0	0.0	0.0	0.0	0.0	0.0	0.0	0.0	0.0	0.0	0.0	0.0	0.31	0.0	0.0	0.0	0.0	0.0	0.0	0.0	0.0	0.0	0.0	0.0	0.0	0.0	0.02	0.01	0.01	0.01	0.02	0.0	0.01	0.0	0.04	0.01	0.0	0.0	0.01	0.0	0.0	0.0	0.0	0.0	0.0	0.02	0.0	0.0	0.0
P8S4_180207_353_A01	0.03	0.0	0.0	0.0	0.0	0.01	0.01	0.0	0.0	0.0	0.07	0.0	0.32	0.0	0.0	0.0	0.0	0.0	0.0	0.0	0.06	0.0	0.0	0.0	0.0	0.0	0.0	0.0	0.0	0.0	0.01	0.06	0.07	0.03	0.02	0.04	0.01	0.0	0.0	0.0	0.04	0.0	0.06	0.05	0.03	0.0	0.0	0.0	0.07
P2S4_180716_055_A01	0.03	0.0	0.0	0.02	0.0	0.0	0.02	0.01	0.0	0.0	0.16	0.02	0.32	0.05	0.0	0.03	0.0	0.0	0.07	0.0	0.02	0.0	0.02	0.0	0.0	0.01	0.08	0.06	0.07	0.0	0.0	0.0	0.0	0.0	0.0	0.0	0.0	0.0	0.0	0.0	0.0	0.0	0.0	0.0	0.0	0.0	0.0	0.0	0.0
P9S4_180619_403_A01	0.0	0.01	0.0	0.0	0.0	0.01	0.03	0.0	0.0	0.0	0.01	0.0	0.33	0.01	0.13	0.02	0.0	0.0	0.0	0.02	0.0	0.0	0.03	0.0	0.0	0.0	0.0	0.01	0.0	0.0	0.01	0.0	0.02	0.0	0.01	0.0	0.0	0.0	0.0	0.0	0.0	0.0	0.02	0.01	0.01	0.01	0.0	0.0	0.03
PBS4_171106_502_A01	0.0	0.01	0.02	0.0	0.0	0.0	0.0	0.0	0.0	0.0	0.31	0.02	0.34	0.0	0.0	0.0	0.0	0.0	0.0	0.0	0.0	0.0	0.0	0.0	0.0	0.03	0.0	0.0	0.0	0.0	0.01	0.02	0.01	0.01	0.0	0.0	0.0	0.0	0.0	0.02	0.0	0.0	0.02	0.02	0.0	0.0	0.02	0.0	0.0
PBS4_171026_503_A01	0.0	0.01	0.05	0.08	0.0	0.0	0.0	0.0	0.0	0.0	0.0	0.0	0.37	0.03	0.23	0.06	0.03	0.0	0.0	0.0	0.0	0.0	0.0	0.0	0.11	0.03	0.0	0.0	0.0	0.0	0.0	0.0	0.0	0.0	0.0	0.0	0.0	0.0	0.0	0.0	0.0	0.0	0.0	0.0	0.0	0.0	0.0	0.0	0.0
P8S4_171114_354_A01	0.11	0.0	0.0	0.08	0.0	0.0	0.0	0.0	0.0	0.0	0.0	0.0	0.37	0.0	0.01	0.01	0.0	0.0	0.0	0.0	0.0	0.0	0.0	0.0	0.0	0.0	0.0	0.0	0.0	0.0	0.0	0.0	0.0	0.0	0.0	0.0	0.0	0.0	0.0	0.0	0.0	0.0	0.0	0.0	0.0	0.0	0.0	0.0	0.0
PBS4_180629_503_A01	0.0	0.0	0.0	0.0	0.0	0.0	0.0	0.0	0.01	0.0	0.1	0.0	0.38	0.0	0.01	0.0	0.0	0.0	0.0	0.0	0.0	0.03	0.04	0.0	0.0	0.14	0.02	0.07	0.2	0.0	0.0	0.0	0.0	0.0	0.0	0.0	0.0	0.0	0.0	0.0	0.0	0.0	0.0	0.0	0.0	0.0	0.0	0.0	0.0
P1S4_180221_004_A01	0.0	0.0	0.0	0.0	0.0	0.0	0.01	0.0	0.0	0.0	0.08	0.0	0.38	0.0	0.0	0.0	0.0	0.0	0.0	0.0	0.0	0.0	0.0	0.0	0.0	0.0	0.0	0.0	0.0	0.0	0.0	0.01	0.02	0.01	0.0	0.02	0.0	0.0	0.0	0.01	0.0	0.0	0.01	0.0	0.01	0.0	0.01	0.0	0.0
PJS4_200924_801_A01	0.0	0.01	0.02	0.02	0.03	0.06	0.0	0.0	0.0	0.0	0.0	0.0	0.39	0.02	0.18	0.0	0.0	0.03	0.0	0.0	0.0	0.0	0.0	0.0	0.01	0.01	0.01	0.0	0.0	0.13	0.0	0.0	0.0	0.0	0.0	0.0	0.0	0.01	0.0	0.0	0.02	0.0	0.0	0.0	0.01	0.0	0.01	0.0	0.0
P1S4_190228_002_A01	0.04	0.0	0.01	0.0	0.01	0.0	0.0	0.0	0.0	0.0	0.17	0.0	0.41	0.0	0.0	0.09	0.0	0.0	0.0	0.0	0.0	0.03	0.01	0.0	0.0	0.0	0.0	0.0	0.2	0.0	0.0	0.0	0.0	0.0	0.0	0.01	0.0	0.0	0.0	0.0	0.0	0.0	0.02	0.0	0.0	0.0	0.0	0.0	0.0
P9S4_180802_401_A01	0.13	0.01	0.01	0.06	0.15	0.07	0.03	0.0	0.0	0.0	0.0	0.06	0.42	0.0	0.0	0.0	0.0	0.0	0.0	0.0	0.0	0.0	0.0	0.0	0.0	0.0	0.0	0.0	0.0	0.0	0.01	0.0	0.0	0.0	0.0	0.0	0.0	0.0	0.0	0.0	0.0	0.0	0.01	0.0	0.0	0.0	0.0	0.0	0.0
P9S4_171212_403_A01	0.18	0.0	0.0	0.16	0.02	0.0	0.0	0.0	0.0	0.0	0.09	0.01	0.45	0.0	0.01	0.01	0.01	0.0	0.0	0.0	0.0	0.0	0.0	0.0	0.0	0.01	0.0	0.0	0.0	0.0	0.0	0.0	0.0	0.0	0.0	0.0	0.01	0.0	0.0	0.01	0.0	0.0	0.01	0.0	0.01	0.0	0.01	0.0	0.0
P1S4_180814_001_A01	0.0	0.09	0.03	0.08	0.05	0.13	0.14	0.0	0.0	0.0	0.0	0.0	0.47	0.0	0.01	0.0	0.0	0.0	0.0	0.0	0.0	0.0	0.0	0.0	0.0	0.0	0.0	0.0	0.0	0.0	0.0	0.0	0.0	0.0	0.0	0.0	0.0	0.0	0.0	0.0	0.0	0.0	0.0	0.0	0.0	0.0	0.0	0.0	0.0
P1S4_190408_002_A01	0.0	0.0	0.0	0.0	0.0	0.0	0.0	0.01	0.0	0.0	0.0	0.0	0.52	0.0	0.0	0.0	0.0	0.0	0.0	0.0	0.0	0.0	0.0	0.0	0.0	0.0	0.0	0.0	0.0	0.01	0.02	0.0	0.0	0.0	0.01	0.03	0.0	0.0	0.0	0.03	0.03	0.0	0.01	0.0	0.0	0.0	0.01	0.0	0.03
PBS4_180111_502_A01	0.01	0.01	0.0	0.0	0.0	0.0	0.0	0.0	0.0	0.0	0.0	0.0	0.52	0.08	0.22	0.0	0.03	0.0	0.0	0.0	0.0	0.0	0.03	0.01	0.0	0.04	0.04	0.01	0.0	0.0	0.0	0.0	0.0	0.0	0.0	0.0	0.0	0.0	0.0	0.0	0.0	0.0	0.0	0.0	0.0	0.0	0.0	0.0	0.0
P9S4_171108_405_A01	0.09	0.0	0.0	0.03	0.0	0.1	0.0	0.0	0.0	0.0	0.06	0.0	0.53	0.0	0.0	0.0	0.0	0.0	0.0	0.0	0.0	0.0	0.0	0.0	0.0	0.0	0.0	0.0	0.0	0.0	0.0	0.0	0.0	0.0	0.0	0.01	0.0	0.0	0.0	0.0	0.0	0.0	0.01	0.0	0.0	0.0	0.01	0.0	0.0
PAS4_180925_453_A01	0.0	0.0	0.0	0.0	0.0	0.0	0.0	0.0	0.0	0.0	0.0	0.0	0.55	0.0	0.0	0.0	0.0	0.0	0.0	0.0	0.0	0.0	0.0	0.0	0.0	0.0	0.13	0.14	0.15	0.0	0.0	0.0	0.0	0.0	0.0	0.0	0.0	0.0	0.0	0.0	0.0	0.0	0.0	0.0	0.0	0.0	0.0	0.0	0.0
P8S4_171122_353_A01	0.0	0.0	0.0	0.01	0.0	0.0	0.0	0.0	0.01	0.0	0.29	0.0	0.58	0.0	0.0	0.0	0.01	0.0	0.0	0.0	0.0	0.0	0.0	0.0	0.0	0.01	0.0	0.0	0.01	0.0	0.0	0.0	0.0	0.0	0.0	0.0	0.0	0.0	0.0	0.0	0.0	0.0	0.0	0.0	0.01	0.0	0.0	0.0	0.0
PBS4_171206_504_A01	0.04	0.0	0.01	0.01	0.0	0.0	0.03	0.0	0.0	0.0	0.04	0.06	0.76	0.0	0.0	0.0	0.0	0.0	0.0	0.0	0.0	0.0	0.0	0.0	0.0	0.0	0.0	0.0	0.0	0.0	0.0	0.0	0.0	0.0	0.0	0.0	0.0	0.0	0.0	0.0	0.0	0.0	0.0	0.0	0.0	0.0	0.0	0.0	0.0
P8S4_180427_357_A01	0.0	0.0	0.0	0.0	0.0	0.0	0.0	0.0	0.0	0.0	0.0	0.0	0.8	0.0	0.0	0.0	0.0	0.0	0.0	0.0	0.0	0.0	0.0	0.0	0.0	0.0	0.04	0.01	0.15	0.0	0.0	0.0	0.0	0.0	0.0	0.0	0.0	0.0	0.0	0.0	0.0	0.0	0.0	0.0	0.0	0.0	0.0	0.0	0.0
PAS4_180205_453_A01	0.02	0.0	0.0	0.01	0.03	0.02	0.03	0.0	0.0	0.0	0.04	0.09	0.01	0.07	0.01	0.0	0.0	0.01	0.06	0.0	0.0	0.0	0.0	0.0	0.0	0.0	0.09	0.03	0.01	0.0	0.0	0.0	0.0	0.0	0.0	0.0	0.0	0.0	0.0	0.0	0.0	0.0	0.0	0.0	0.01	0.0	0.0	0.0	0.0
PBS4_180205_502_A01	0.03	0.0	0.0	0.0	0.0	0.0	0.0	0.0	0.0	0.0	0.03	0.1	0.1	0.04	0.01	0.09	0.0	0.0	0.0	0.0	0.0	0.0	0.0	0.0	0.0	0.07	0.0	0.01	0.02	0.0	0.0	0.0	0.0	0.0	0.0	0.04	0.08	0.0	0.01	0.0	0.06	0.0	0.09	0.0	0.0	0.0	0.01	0.06	0.02
PAS4_180118_453_A01	0.03	0.0	0.0	0.0	0.0	0.0	0.01	0.0	0.01	0.0	0.02	0.12	0.02	0.0	0.0	0.02	0.0	0.0	0.0	0.0	0.01	0.0	0.02	0.0	0.06	0.1	0.06	0.04	0.0	0.01	0.0	0.01	0.03	0.05	0.0	0.03	0.05	0.01	0.0	0.05	0.0	0.0	0.04	0.01	0.0	0.0	0.01	0.0	0.0
P2S4_171019_051_A01	0.0	0.0	0.0	0.0	0.0	0.0	0.0	0.0	0.0	0.0	0.0	0.12	0.0	0.0	0.01	0.0	0.0	0.0	0.0	0.0	0.0	0.01	0.0	0.0	0.01	0.0	0.02	0.01	0.05	0.0	0.0	0.05	0.07	0.02	0.02	0.08	0.03	0.02	0.01	0.07	0.0	0.01	0.07	0.02	0.03	0.0	0.01	0.04	0.05
PBS4_171030_504_A01	0.01	0.0	0.01	0.06	0.0	0.0	0.01	0.0	0.0	0.0	0.0	0.13	0.0	0.0	0.05	0.01	0.02	0.0	0.06	0.0	0.0	0.0	0.0	0.0	0.01	0.0	0.02	0.01	0.01	0.0	0.0	0.02	0.03	0.0	0.02	0.03	0.0	0.01	0.0	0.02	0.0	0.0	0.03	0.03	0.01	0.0	0.02	0.0	0.01
PBS4_180319_503_A01	0.04	0.0	0.0	0.0	0.13	0.0	0.1	0.0	0.0	0.0	0.08	0.14	0.14	0.0	0.0	0.0	0.0	0.0	0.0	0.0	0.0	0.0	0.0	0.0	0.0	0.0	0.0	0.0	0.0	0.01	0.01	0.0	0.05	0.0	0.0	0.0	0.0	0.0	0.0	0.0	0.0	0.0	0.0	0.0	0.01	0.0	0.0	0.01	0.03
P8S4_180205_352_A01	0.0	0.0	0.0	0.0	0.0	0.0	0.0	0.08	0.0	0.0	0.06	0.17	0.01	0.0	0.0	0.0	0.0	0.02	0.0	0.0	0.02	0.03	0.01	0.0	0.01	0.02	0.05	0.03	0.02	0.0	0.0	0.02	0.04	0.02	0.0	0.03	0.0	0.0	0.0	0.0	0.03	0.0	0.03	0.01	0.0	0.01	0.01	0.01	0.01
PBS4_181005_503_A01	0.08	0.0	0.0	0.09	0.0	0.0	0.0	0.0	0.0	0.0	0.04	0.17	0.0	0.0	0.0	0.0	0.0	0.0	0.0	0.0	0.0	0.0	0.0	0.0	0.0	0.0	0.0	0.0	0.0	0.0	0.0	0.01	0.04	0.05	0.01	0.03	0.05	0.0	0.04	0.06	0.0	0.0	0.04	0.0	0.0	0.0	0.0	0.01	0.0
P8S4_171108_354_A01	0.0	0.0	0.0	0.0	0.0	0.0	0.0	0.0	0.03	0.01	0.12	0.18	0.0	0.0	0.0	0.0	0.0	0.0	0.0	0.0	0.0	0.0	0.0	0.0	0.0	0.0	0.02	0.06	0.1	0.0	0.0	0.0	0.0	0.0	0.0	0.01	0.0	0.0	0.0	0.0	0.0	0.0	0.0	0.0	0.0	0.0	0.0	0.0	0.0
P9S4_171211_407_A01	0.09	0.0	0.0	0.0	0.0	0.0	0.01	0.0	0.0	0.0	0.0	0.18	0.01	0.0	0.02	0.0	0.0	0.0	0.0	0.0	0.0	0.0	0.0	0.0	0.0	0.0	0.12	0.08	0.0	0.0	0.0	0.0	0.0	0.0	0.0	0.0	0.0	0.0	0.0	0.0	0.0	0.0	0.0	0.0	0.0	0.0	0.0	0.0	0.0
P1S4_180604_006_A01	0.15	0.0	0.0	0.0	0.0	0.01	0.0	0.0	0.0	0.0	0.0	0.19	0.15	0.0	0.0	0.0	0.0	0.0	0.0	0.0	0.0	0.01	0.0	0.0	0.0	0.0	0.01	0.01	0.02	0.0	0.0	0.0	0.0	0.0	0.0	0.0	0.0	0.0	0.0	0.0	0.0	0.0	0.0	0.0	0.0	0.0	0.0	0.0	0.0
PAS4_171110_451_A01	0.0	0.0	0.0	0.0	0.0	0.0	0.0	0.01	0.0	0.0	0.03	0.2	0.11	0.0	0.07	0.0	0.0	0.0	0.0	0.0	0.0	0.0	0.0	0.0	0.0	0.0	0.0	0.0	0.04	0.0	0.0	0.0	0.0	0.0	0.0	0.0	0.0	0.0	0.0	0.0	0.0	0.0	0.0	0.0	0.0	0.0	0.0	0.0	0.0
PAS4_180822_455_A01	0.0	0.0	0.0	0.0	0.0	0.0	0.0	0.0	0.0	0.0	0.01	0.21	0.13	0.0	0.0	0.03	0.0	0.0	0.0	0.0	0.0	0.0	0.0	0.0	0.0	0.03	0.06	0.06	0.03	0.0	0.0	0.0	0.0	0.0	0.0	0.0	0.0	0.0	0.0	0.0	0.0	0.0	0.0	0.0	0.0	0.0	0.0	0.0	0.0
P8S4_171212_352_A01	0.0	0.0	0.07	0.1	0.0	0.0	0.0	0.0	0.0	0.0	0.0	0.21	0.11	0.08	0.0	0.02	0.01	0.0	0.01	0.0	0.0	0.0	0.0	0.0	0.0	0.01	0.12	0.01	0.03	0.0	0.0	0.0	0.0	0.0	0.0	0.0	0.0	0.0	0.0	0.0	0.0	0.0	0.0	0.0	0.0	0.0	0.0	0.0	0.0
PAS4_190510_451_A01	0.0	0.0	0.0	0.09	0.0	0.0	0.0	0.0	0.0	0.0	0.0	0.22	0.22	0.0	0.0	0.0	0.0	0.0	0.01	0.0	0.0	0.0	0.02	0.0	0.0	0.0	0.02	0.01	0.02	0.0	0.0	0.04	0.01	0.01	0.0	0.02	0.0	0.0	0.01	0.04	0.0	0.0	0.02	0.0	0.01	0.02	0.02	0.0	0.01
P2S4_180111_053_A01	0.04	0.0	0.0	0.06	0.04	0.09	0.02	0.0	0.0	0.0	0.07	0.22	0.0	0.0	0.0	0.14	0.0	0.0	0.0	0.0	0.01	0.01	0.01	0.01	0.05	0.05	0.04	0.0	0.04	0.0	0.0	0.01	0.0	0.01	0.0	0.0	0.01	0.0	0.0	0.0	0.0	0.0	0.0	0.0	0.0	0.0	0.0	0.0	0.0
PAS4_180504_454_A01	0.0	0.0	0.0	0.01	0.07	0.01	0.01	0.02	0.0	0.0	0.03	0.25	0.01	0.05	0.01	0.0	0.01	0.0	0.0	0.03	0.0	0.0	0.0	0.0	0.0	0.0	0.0	0.0	0.1	0.0	0.0	0.02	0.01	0.0	0.01	0.03	0.0	0.04	0.0	0.01	0.0	0.0	0.0	0.01	0.0	0.0	0.0	0.02	0.0
P1S4_180730_001_A01	0.13	0.0	0.0	0.0	0.0	0.03	0.0	0.01	0.0	0.0	0.01	0.26	0.0	0.0	0.0	0.0	0.0	0.0	0.0	0.0	0.0	0.0	0.0	0.0	0.0	0.0	0.05	0.06	0.0	0.0	0.04	0.0	0.0	0.0	0.0	0.05	0.05	0.01	0.01	0.07	0.01	0.01	0.08	0.0	0.02	0.02	0.01	0.0	0.03
PBS4_180816_502_A01	0.15	0.02	0.0	0.02	0.0	0.0	0.0	0.0	0.0	0.0	0.0	0.27	0.0	0.11	0.08	0.0	0.0	0.0	0.01	0.0	0.0	0.0	0.0	0.0	0.01	0.0	0.04	0.09	0.0	0.0	0.0	0.0	0.0	0.0	0.0	0.0	0.0	0.0	0.0	0.0	0.0	0.0	0.0	0.0	0.0	0.0	0.0	0.0	0.0
P9S4_180727_404_A01	0.0	0.0	0.0	0.0	0.0	0.0	0.0	0.02	0.03	0.0	0.23	0.27	0.09	0.0	0.06	0.0	0.01	0.0	0.0	0.0	0.0	0.0	0.0	0.0	0.0	0.0	0.0	0.05	0.02	0.01	0.0	0.0	0.0	0.0	0.0	0.0	0.0	0.0	0.0	0.0	0.0	0.0	0.0	0.0	0.0	0.0	0.0	0.0	0.0
P1S4_180815_002_A01	0.2	0.0	0.0	0.0	0.0	0.0	0.0	0.0	0.0	0.0	0.0	0.27	0.03	0.1	0.17	0.0	0.02	0.0	0.02	0.02	0.0	0.0	0.0	0.0	0.0	0.1	0.0	0.02	0.05	0.0	0.0	0.0	0.0	0.0	0.0	0.0	0.0	0.0	0.0	0.0	0.0	0.0	0.0	0.0	0.0	0.0	0.0	0.0	0.0
PAS4_180703_455_A01	0.0	0.04	0.12	0.03	0.12	0.0	0.0	0.1	0.08	0.01	0.11	0.29	0.09	0.01	0.0	0.0	0.0	0.0	0.0	0.0	0.0	0.0	0.0	0.0	0.0	0.0	0.0	0.0	0.0	0.0	0.0	0.0	0.0	0.0	0.0	0.0	0.0	0.0	0.0	0.0	0.0	0.0	0.0	0.0	0.0	0.0	0.0	0.0	0.0
P2S4_180514_053_A01	0.01	0.0	0.0	0.0	0.0	0.0	0.0	0.04	0.0	0.0	0.05	0.29	0.06	0.0	0.0	0.0	0.0	0.0	0.0	0.0	0.0	0.0	0.0	0.0	0.0	0.0	0.0	0.0	0.0	0.0	0.0	0.0	0.0	0.0	0.0	0.0	0.0	0.0	0.0	0.0	0.0	0.0	0.0	0.0	0.0	0.0	0.0	0.0	0.0
P8S4_171215_355_A01	0.17	0.0	0.0	0.11	0.19	0.0	0.0	0.07	0.0	0.0	0.11	0.29	0.0	0.0	0.0	0.0	0.0	0.0	0.0	0.01	0.0	0.0	0.01	0.0	0.0	0.0	0.0	0.01	0.02	0.0	0.0	0.0	0.0	0.0	0.0	0.01	0.0	0.0	0.0	0.0	0.0	0.0	0.0	0.0	0.0	0.0	0.0	0.0	0.0
P8S4_171004_356_A01	0.06	0.0	0.05	0.03	0.0	0.0	0.0	0.03	0.0	0.0	0.02	0.3	0.02	0.04	0.15	0.0	0.0	0.0	0.0	0.0	0.0	0.0	0.0	0.0	0.0	0.0	0.04	0.07	0.0	0.0	0.01	0.0	0.01	0.0	0.0	0.0	0.0	0.0	0.0	0.01	0.0	0.0	0.0	0.0	0.0	0.01	0.0	0.0	0.0
PBS4_180213_503_A01	0.0	0.0	0.0	0.0	0.0	0.0	0.0	0.0	0.0	0.0	0.0	0.3	0.05	0.0	0.0	0.01	0.02	0.0	0.03	0.0	0.0	0.0	0.0	0.0	0.01	0.01	0.0	0.01	0.02	0.0	0.01	0.0	0.0	0.0	0.0	0.01	0.0	0.0	0.0	0.0	0.0	0.0	0.0	0.0	0.03	0.0	0.01	0.0	0.0
P1S4_180706_008_A01	0.23	0.09	0.01	0.0	0.0	0.11	0.0	0.0	0.0	0.0	0.0	0.33	0.12	0.05	0.0	0.0	0.0	0.0	0.0	0.0	0.0	0.0	0.0	0.0	0.0	0.0	0.03	0.02	0.0	0.0	0.0	0.0	0.0	0.0	0.0	0.0	0.0	0.0	0.0	0.0	0.0	0.0	0.0	0.0	0.0	0.0	0.0	0.01	0.0
P1S4_180731_002_A01	0.15	0.02	0.01	0.0	0.02	0.0	0.09	0.0	0.0	0.0	0.0	0.34	0.03	0.0	0.0	0.0	0.0	0.0	0.0	0.0	0.0	0.0	0.0	0.0	0.0	0.0	0.0	0.0	0.0	0.0	0.0	0.0	0.0	0.0	0.0	0.0	0.0	0.0	0.0	0.0	0.0	0.0	0.0	0.0	0.0	0.0	0.0	0.0	0.0
P1S4_180820_001_A01	0.02	0.0	0.0	0.04	0.0	0.01	0.01	0.0	0.0	0.0	0.0	0.35	0.02	0.0	0.0	0.01	0.0	0.0	0.01	0.01	0.0	0.14	0.01	0.0	0.0	0.09	0.08	0.06	0.11	0.0	0.01	0.0	0.0	0.0	0.0	0.0	0.0	0.0	0.0	0.01	0.0	0.0	0.0	0.0	0.0	0.0	0.0	0.0	0.0
PBS4_180213_502_A01	0.32	0.0	0.02	0.09	0.06	0.0	0.0	0.05	0.0	0.0	0.07	0.37	0.02	0.0	0.0	0.0	0.0	0.0	0.0	0.0	0.0	0.0	0.0	0.0	0.0	0.0	0.0	0.0	0.0	0.0	0.0	0.0	0.0	0.0	0.0	0.0	0.0	0.0	0.0	0.0	0.0	0.0	0.0	0.0	0.0	0.0	0.0	0.0	0.0
P8S4_171005_351_A01	0.0	0.05	0.04	0.0	0.02	0.0	0.05	0.0	0.0	0.0	0.23	0.37	0.0	0.04	0.04	0.02	0.0	0.0	0.01	0.0	0.0	0.02	0.0	0.01	0.04	0.0	0.01	0.0	0.03	0.0	0.0	0.0	0.0	0.0	0.0	0.0	0.0	0.0	0.0	0.0	0.0	0.0	0.0	0.0	0.0	0.0	0.0	0.0	0.0
PAS4_190627_460_A01	0.13	0.0	0.0	0.2	0.0	0.0	0.0	0.0	0.0	0.0	0.0	0.42	0.02	0.0	0.0	0.01	0.0	0.0	0.0	0.0	0.0	0.01	0.02	0.0	0.02	0.03	0.01	0.12	0.0	0.0	0.0	0.0	0.0	0.0	0.0	0.0	0.0	0.0	0.0	0.0	0.0	0.0	0.0	0.0	0.0	0.0	0.0	0.0	0.0
P8S4_180122_353_A01	0.0	0.0	0.0	0.0	0.0	0.0	0.0	0.0	0.0	0.0	0.0	0.44	0.01	0.0	0.0	0.03	0.11	0.0	0.0	0.0	0.02	0.03	0.02	0.0	0.0	0.07	0.1	0.17	0.0	0.0	0.0	0.0	0.0	0.0	0.0	0.0	0.0	0.0	0.0	0.0	0.0	0.0	0.0	0.0	0.0	0.0	0.0	0.0	0.0
P1S4_180809_001_A01	0.36	0.01	0.01	0.0	0.02	0.0	0.0	0.0	0.0	0.0	0.0	0.47	0.02	0.0	0.0	0.0	0.0	0.0	0.0	0.0	0.0	0.0	0.0	0.0	0.0	0.0	0.0	0.01	0.01	0.0	0.0	0.0	0.02	0.0	0.0	0.01	0.0	0.0	0.0	0.01	0.0	0.0	0.01	0.0	0.0	0.0	0.0	0.0	0.0
PAS4_181011_451_A01	0.0	0.0	0.0	0.0	0.0	0.0	0.0	0.0	0.0	0.0	0.0	0.5	0.01	0.0	0.0	0.0	0.13	0.08	0.0	0.0	0.06	0.09	0.0	0.0	0.03	0.1	0.0	0.0	0.0	0.0	0.0	0.0	0.0	0.0	0.0	0.0	0.0	0.0	0.0	0.0	0.0	0.0	0.0	0.0	0.0	0.0	0.0	0.0	0.0
PAS4_180122_451_A01	0.02	0.0	0.01	0.0	0.0	0.04	0.07	0.0	0.01	0.0	0.08	0.05	0.04	0.03	0.07	0.02	0.0	0.0	0.03	0.0	0.01	0.01	0.0	0.0	0.0	0.0	0.01	0.03	0.0	0.0	0.0	0.03	0.01	0.03	0.02	0.02	0.02	0.0	0.01	0.0	0.0	0.01	0.02	0.01	0.03	0.0	0.0	0.02	0.01
P8S4_180227_352_A01	0.0	0.0	0.0	0.0	0.0	0.0	0.0	0.01	0.0	0.0	0.09	0.0	0.08	0.02	0.06	0.0	0.0	0.0	0.0	0.06	0.0	0.0	0.0	0.0	0.0	0.0	0.04	0.02	0.01	0.0	0.05	0.02	0.05	0.02	0.01	0.05	0.02	0.03	0.0	0.03	0.0	0.03	0.05	0.0	0.0	0.06	0.03	0.04	0.0
PAS4_180112_456_A01	0.06	0.04	0.0	0.04	0.0	0.12	0.04	0.0	0.0	0.0	0.13	0.0	0.06	0.0	0.02	0.01	0.01	0.05	0.09	0.0	0.04	0.06	0.0	0.0	0.0	0.06	0.0	0.0	0.0	0.0	0.0	0.0	0.0	0.0	0.0	0.0	0.0	0.0	0.0	0.0	0.0	0.0	0.0	0.0	0.0	0.0	0.0	0.0	0.0
P9S4_180219_401_A01	0.03	0.0	0.0	0.04	0.0	0.0	0.0	0.0	0.0	0.0	0.13	0.04	0.0	0.0	0.06	0.0	0.06	0.07	0.0	0.0	0.04	0.0	0.0	0.0	0.0	0.01	0.01	0.0	0.0	0.06	0.0	0.01	0.03	0.01	0.02	0.01	0.01	0.02	0.0	0.01	0.01	0.0	0.01	0.0	0.0	0.0	0.0	0.01	0.01
PXS4_180717_901_A01	0.0	0.0	0.02	0.0	0.0	0.0	0.0	0.0	0.1	0.01	0.14	0.0	0.09	0.01	0.06	0.0	0.0	0.0	0.0	0.0	0.01	0.01	0.0	0.0	0.0	0.0	0.01	0.0	0.04	0.11	0.0	0.0	0.03	0.0	0.03	0.05	0.02	0.0	0.0	0.0	0.0	0.0	0.02	0.01	0.0	0.0	0.0	0.01	0.0
P8S4_180302_356_A01	0.06	0.0	0.0	0.0	0.0	0.07	0.0	0.0	0.03	0.07	0.15	0.04	0.01	0.03	0.0	0.0	0.0	0.0	0.0	0.0	0.0	0.0	0.0	0.0	0.0	0.0	0.02	0.01	0.0	0.11	0.04	0.0	0.03	0.01	0.02	0.02	0.01	0.0	0.0	0.0	0.0	0.0	0.01	0.01	0.0	0.0	0.0	0.01	0.01
PAS4_180504_451_A01	0.0	0.0	0.0	0.0	0.0	0.0	0.0	0.0	0.0	0.0	0.16	0.0	0.13	0.06	0.15	0.03	0.04	0.01	0.0	0.0	0.0	0.01	0.0	0.0	0.0	0.1	0.13	0.01	0.0	0.02	0.01	0.0	0.0	0.0	0.01	0.0	0.02	0.0	0.0	0.0	0.0	0.0	0.0	0.0	0.0	0.0	0.0	0.0	0.03
PAS4_180606_452_A01	0.1	0.01	0.02	0.0	0.01	0.04	0.04	0.0	0.0	0.0	0.17	0.0	0.0	0.0	0.0	0.0	0.0	0.0	0.0	0.0	0.0	0.0	0.0	0.0	0.0	0.0	0.0	0.0	0.0	0.0	0.02	0.02	0.06	0.01	0.06	0.03	0.0	0.05	0.0	0.0	0.0	0.01	0.04	0.0	0.0	0.04	0.0	0.0	0.0
PBS4_180620_501_A01	0.04	0.0	0.0	0.02	0.03	0.0	0.0	0.0	0.0	0.0	0.18	0.0	0.0	0.0	0.01	0.0	0.0	0.0	0.0	0.0	0.0	0.0	0.0	0.0	0.0	0.0	0.0	0.0	0.0	0.06	0.02	0.01	0.02	0.0	0.04	0.02	0.0	0.0	0.0	0.0	0.01	0.0	0.02	0.01	0.0	0.0	0.04	0.0	0.01
PAS4_180312_451_A01	0.09	0.09	0.09	0.0	0.09	0.02	0.04	0.05	0.16	0.02	0.18	0.0	0.0	0.0	0.09	0.02	0.02	0.0	0.0	0.0	0.0	0.0	0.01	0.01	0.0	0.0	0.0	0.0	0.02	0.0	0.0	0.0	0.0	0.0	0.0	0.0	0.0	0.0	0.0	0.0	0.0	0.0	0.0	0.0	0.0	0.0	0.0	0.0	0.0
P9S4_171211_402_A01	0.05	0.0	0.03	0.04	0.01	0.0	0.0	0.0	0.0	0.0	0.21	0.02	0.02	0.0	0.11	0.08	0.01	0.03	0.0	0.0	0.0	0.0	0.0	0.03	0.0	0.05	0.0	0.0	0.0	0.0	0.0	0.0	0.0	0.0	0.0	0.0	0.0	0.0	0.0	0.0	0.0	0.0	0.0	0.0	0.0	0.0	0.0	0.0	0.0
P9S4_180531_410_A01	0.0	0.0	0.0	0.0	0.0	0.0	0.0	0.0	0.0	0.0	0.21	0.0	0.08	0.0	0.0	0.0	0.0	0.0	0.0	0.0	0.0	0.01	0.0	0.0	0.05	0.0	0.03	0.15	0.0	0.0	0.01	0.0	0.03	0.0	0.01	0.02	0.01	0.0	0.0	0.01	0.0	0.0	0.04	0.0	0.02	0.0	0.02	0.0	0.0
P9S4_180403_406_A01	0.0	0.0	0.0	0.0	0.0	0.0	0.0	0.0	0.0	0.0	0.22	0.0	0.15	0.0	0.0	0.01	0.0	0.0	0.13	0.01	0.01	0.01	0.01	0.02	0.0	0.03	0.01	0.0	0.08	0.0	0.0	0.01	0.02	0.0	0.01	0.02	0.0	0.01	0.0	0.02	0.01	0.0	0.01	0.01	0.0	0.0	0.0	0.01	0.0
P2S4_180205_056_A01	0.05	0.0	0.0	0.0	0.0	0.0	0.0	0.0	0.0	0.0	0.22	0.0	0.0	0.0	0.0	0.0	0.0	0.0	0.06	0.0	0.0	0.01	0.01	0.01	0.02	0.02	0.01	0.09	0.01	0.0	0.0	0.0	0.0	0.0	0.0	0.0	0.0	0.0	0.0	0.0	0.0	0.0	0.0	0.0	0.0	0.0	0.0	0.0	0.0
P9S4_171003_409_A01	0.0	0.0	0.0	0.0	0.0	0.0	0.0	0.01	0.0	0.0	0.23	0.0	0.0	0.02	0.07	0.0	0.0	0.0	0.01	0.0	0.0	0.0	0.0	0.0	0.0	0.06	0.01	0.0	0.01	0.0	0.01	0.05	0.05	0.02	0.04	0.05	0.0	0.04	0.0	0.05	0.0	0.0	0.04	0.03	0.02	0.05	0.0	0.11	0.01
P1S4_180413_003_A01	0.0	0.0	0.0	0.0	0.0	0.0	0.0	0.0	0.0	0.0	0.23	0.0	0.21	0.0	0.0	0.03	0.0	0.0	0.0	0.01	0.0	0.17	0.05	0.02	0.1	0.1	0.0	0.0	0.0	0.0	0.01	0.0	0.0	0.0	0.0	0.0	0.0	0.0	0.0	0.0	0.0	0.0	0.0	0.0	0.0	0.0	0.0	0.0	0.0
P1S4_190614_002_A01	0.0	0.0	0.0	0.0	0.0	0.0	0.0	0.0	0.11	0.01	0.24	0.01	0.15	0.0	0.0	0.2	0.0	0.0	0.0	0.0	0.0	0.0	0.04	0.05	0.04	0.08	0.0	0.0	0.0	0.0	0.0	0.0	0.02	0.0	0.0	0.0	0.0	0.0	0.0	0.01	0.0	0.01	0.0	0.0	0.0	0.0	0.0	0.0	0.01
P2S4_180108_052_A01	0.0	0.0	0.0	0.0	0.0	0.0	0.0	0.04	0.0	0.0	0.25	0.08	0.08	0.0	0.0	0.0	0.0	0.0	0.0	0.0	0.0	0.0	0.0	0.0	0.0	0.0	0.0	0.0	0.0	0.0	0.02	0.04	0.01	0.04	0.0	0.02	0.03	0.0	0.0	0.07	0.0	0.01	0.02	0.01	0.01	0.0	0.0	0.03	0.01
P8S4_180226_352_A01	0.12	0.04	0.0	0.03	0.0	0.0	0.0	0.11	0.0	0.0	0.26	0.0	0.0	0.0	0.0	0.0	0.01	0.0	0.0	0.0	0.0	0.02	0.0	0.0	0.0	0.0	0.0	0.0	0.01	0.0	0.02	0.0	0.0	0.01	0.0	0.01	0.01	0.01	0.0	0.01	0.01	0.0	0.01	0.0	0.0	0.0	0.0	0.0	0.01
P8S4_180402_356_A01	0.0	0.0	0.04	0.04	0.0	0.0	0.0	0.0	0.0	0.0	0.26	0.0	0.17	0.0	0.0	0.04	0.0	0.05	0.04	0.0	0.0	0.01	0.01	0.01	0.09	0.01	0.15	0.01	0.0	0.0	0.0	0.0	0.0	0.0	0.0	0.01	0.0	0.0	0.0	0.0	0.0	0.0	0.0	0.0	0.0	0.0	0.0	0.0	0.0
P8S4_180827_359_A01	0.0	0.0	0.0	0.0	0.0	0.0	0.0	0.01	0.0	0.0	0.26	0.0	0.13	0.0	0.02	0.01	0.0	0.0	0.1	0.0	0.0	0.1	0.0	0.02	0.05	0.01	0.26	0.01	0.01	0.0	0.0	0.0	0.0	0.0	0.0	0.0	0.0	0.0	0.0	0.0	0.0	0.0	0.0	0.0	0.0	0.0	0.0	0.0	0.0
PBS4_180906_501_A01	0.2	0.0	0.05	0.08	0.04	0.0	0.05	0.0	0.0	0.0	0.26	0.0	0.19	0.0	0.0	0.0	0.0	0.0	0.0	0.0	0.0	0.0	0.0	0.0	0.0	0.0	0.0	0.0	0.0	0.0	0.03	0.0	0.0	0.0	0.01	0.0	0.0	0.0	0.0	0.0	0.0	0.0	0.0	0.01	0.01	0.0	0.0	0.0	0.0
PES4_190830_654_A01	0.0	0.27	0.09	0.0	0.0	0.0	0.0	0.04	0.26	0.0	0.29	0.0	0.0	0.01	0.02	0.0	0.0	0.0	0.0	0.0	0.0	0.0	0.0	0.0	0.0	0.0	0.0	0.0	0.02	0.0	0.0	0.0	0.0	0.0	0.0	0.0	0.0	0.0	0.0	0.0	0.0	0.0	0.0	0.0	0.0	0.0	0.0	0.0	0.0
P8S4_180409_355_A01	0.0	0.0	0.0	0.1	0.0	0.0	0.0	0.0	0.02	0.04	0.3	0.0	0.01	0.01	0.15	0.0	0.03	0.04	0.0	0.0	0.02	0.0	0.0	0.03	0.0	0.04	0.0	0.0	0.0	0.0	0.0	0.0	0.0	0.0	0.0	0.0	0.0	0.0	0.0	0.0	0.0	0.0	0.0	0.0	0.0	0.0	0.0	0.0	0.0
P8S4_180102_352_A01	0.12	0.0	0.0	0.0	0.0	0.28	0.02	0.0	0.06	0.1	0.3	0.0	0.0	0.0	0.0	0.0	0.0	0.0	0.0	0.0	0.0	0.0	0.0	0.0	0.0	0.0	0.0	0.0	0.01	0.0	0.0	0.0	0.0	0.01	0.0	0.0	0.0	0.0	0.0	0.0	0.0	0.0	0.0	0.0	0.0	0.0	0.0	0.0	0.0
PBS4_180212_501_A01	0.0	0.0	0.0	0.18	0.06	0.0	0.12	0.0	0.0	0.0	0.32	0.0	0.0	0.0	0.0	0.0	0.0	0.0	0.0	0.0	0.0	0.0	0.0	0.0	0.0	0.0	0.0	0.01	0.05	0.0	0.0	0.0	0.01	0.0	0.0	0.01	0.0	0.0	0.0	0.01	0.0	0.0	0.02	0.0	0.0	0.0	0.0	0.01	0.0
P8S4_171110_351_A01	0.0	0.0	0.0	0.0	0.0	0.0	0.0	0.0	0.0	0.0	0.34	0.0	0.23	0.12	0.08	0.03	0.0	0.0	0.0	0.0	0.0	0.01	0.03	0.0	0.0	0.0	0.0	0.0	0.0	0.0	0.0	0.0	0.0	0.0	0.0	0.0	0.0	0.0	0.0	0.0	0.0	0.0	0.0	0.0	0.0	0.0	0.0	0.0	0.0
PAS4_180521_452_A01	0.0	0.02	0.0	0.0	0.0	0.0	0.0	0.0	0.0	0.0	0.36	0.27	0.02	0.0	0.0	0.0	0.0	0.0	0.0	0.02	0.03	0.0	0.02	0.0	0.01	0.0	0.01	0.01	0.0	0.0	0.0	0.0	0.0	0.0	0.0	0.0	0.0	0.0	0.0	0.0	0.0	0.0	0.0	0.0	0.0	0.0	0.0	0.0	0.0
P9S4_180410_403_A01	0.04	0.0	0.0	0.02	0.08	0.0	0.0	0.03	0.0	0.0	0.38	0.0	0.28	0.0	0.0	0.01	0.0	0.0	0.0	0.0	0.0	0.0	0.0	0.0	0.0	0.0	0.0	0.0	0.01	0.0	0.0	0.0	0.0	0.0	0.0	0.0	0.0	0.0	0.0	0.0	0.0	0.0	0.0	0.0	0.0	0.0	0.0	0.0	0.0
P8S4_180319_357_A01	0.0	0.0	0.0	0.0	0.0	0.0	0.0	0.02	0.31	0.04	0.58	0.0	0.0	0.0	0.0	0.0	0.0	0.0	0.0	0.0	0.0	0.0	0.0	0.0	0.0	0.0	0.0	0.0	0.0	0.0	0.0	0.0	0.0	0.01	0.0	0.0	0.0	0.0	0.0	0.01	0.0	0.0	0.0	0.0	0.0	0.0	0.0	0.0	0.0
PAS4_180320_452_A01	0.0	0.0	0.0	0.0	0.0	0.0	0.0	0.0	0.0	0.0	0.62	0.0	0.35	0.0	0.0	0.0	0.01	0.0	0.0	0.0	0.0	0.0	0.0	0.0	0.01	0.01	0.0	0.0	0.0	0.0	0.0	0.0	0.0	0.0	0.0	0.0	0.0	0.0	0.0	0.0	0.0	0.0	0.0	0.0	0.0	0.0	0.0	0.0	0.0
PAS4_180529_455_A01	0.0	0.0	0.0	0.0	0.0	0.0	0.0	0.01	0.0	0.0	0.66	0.0	0.0	0.1	0.01	0.0	0.0	0.0	0.0	0.0	0.0	0.01	0.01	0.0	0.0	0.0	0.0	0.0	0.2	0.0	0.0	0.0	0.0	0.0	0.0	0.0	0.0	0.0	0.0	0.0	0.0	0.0	0.0	0.0	0.0	0.0	0.0	0.0	0.0
P2S4_180307_051_A01	0.0	0.0	0.01	0.1	0.0	0.0	0.0	0.0	0.13	0.0	0.0	0.0	0.03	0.02	0.03	0.04	0.0	0.0	0.0	0.0	0.0	0.01	0.0	0.0	0.0	0.0	0.0	0.0	0.0	0.0	0.01	0.0	0.01	0.0	0.0	0.0	0.0	0.0	0.0	0.0	0.01	0.0	0.0	0.0	0.0	0.0	0.06	0.0	0.07
P8S4_180307_351_A01	0.0	0.0	0.0	0.0	0.0	0.0	0.0	0.0	0.21	0.02	0.04	0.0	0.0	0.0	0.01	0.01	0.0	0.0	0.0	0.0	0.01	0.01	0.01	0.0	0.0	0.05	0.0	0.0	0.02	0.0	0.0	0.04	0.03	0.02	0.03	0.07	0.0	0.07	0.0	0.0	0.0	0.0	0.0	0.0	0.01	0.0	0.01	0.0	0.05
P8S4_180110_353_A01	0.04	0.0	0.04	0.11	0.0	0.02	0.0	0.0	0.36	0.0	0.0	0.0	0.0	0.0	0.0	0.0	0.0	0.0	0.0	0.0	0.0	0.0	0.0	0.0	0.0	0.0	0.0	0.0	0.0	0.03	0.03	0.02	0.03	0.02	0.05	0.02	0.0	0.02	0.0	0.0	0.0	0.01	0.02	0.0	0.0	0.0	0.0	0.01	0.0
PBS4_180312_504_A01	0.02	0.07	0.05	0.05	0.19	0.0	0.03	0.27	0.12	0.0	0.2	0.0	0.0	0.0	0.0	0.0	0.0	0.0	0.0	0.0	0.0	0.0	0.0	0.0	0.0	0.0	0.0	0.0	0.0	0.0	0.0	0.0	0.0	0.0	0.0	0.0	0.0	0.0	0.0	0.0	0.0	0.0	0.0	0.0	0.0	0.0	0.0	0.0	0.0
PAS4_180830_455_A01	0.0	0.02	0.0	0.0	0.01	0.02	0.0	0.28	0.05	0.01	0.12	0.21	0.27	0.0	0.0	0.0	0.0	0.0	0.0	0.0	0.0	0.0	0.01	0.0	0.0	0.0	0.0	0.0	0.0	0.0	0.0	0.0	0.0	0.0	0.0	0.0	0.0	0.0	0.0	0.0	0.0	0.0	0.0	0.0	0.0	0.0	0.0	0.0	0.0
P8S4_180411_358_A01	0.0	0.01	0.0	0.0	0.0	0.0	0.0	0.45	0.0	0.0	0.01	0.03	0.03	0.0	0.0	0.0	0.0	0.0	0.0	0.0	0.0	0.0	0.0	0.0	0.0	0.0	0.0	0.0	0.0	0.08	0.04	0.0	0.01	0.02	0.01	0.04	0.04	0.0	0.03	0.0	0.06	0.0	0.01	0.01	0.01	0.04	0.01	0.01	0.03
P9S4_180423_406_A01	0.0	0.0	0.0	0.0	0.01	0.0	0.13	0.02	0.0	0.0	0.13	0.0	0.0	0.09	0.01	0.01	0.0	0.01	0.01	0.09	0.0	0.01	0.0	0.02	0.0	0.0	0.0	0.0	0.0	0.12	0.02	0.0	0.03	0.02	0.01	0.02	0.03	0.01	0.0	0.04	0.0	0.0	0.06	0.0	0.0	0.04	0.01	0.01	0.0
P1S4_180313_001_A01	0.0	0.0	0.0	0.0	0.0	0.0	0.14	0.0	0.0	0.0	0.0	0.05	0.0	0.0	0.0	0.0	0.0	0.0	0.0	0.0	0.0	0.0	0.0	0.0	0.0	0.0	0.0	0.0	0.0	0.09	0.04	0.0	0.02	0.0	0.02	0.06	0.08	0.0	0.02	0.01	0.07	0.0	0.08	0.02	0.02	0.0	0.01	0.04	0.0
P1S4_180129_001_A01	0.14	0.01	0.0	0.01	0.01	0.11	0.15	0.0	0.0	0.0	0.0	0.0	0.1	0.12	0.15	0.01	0.0	0.0	0.02	0.01	0.0	0.0	0.01	0.0	0.0	0.02	0.02	0.07	0.03	0.0	0.0	0.01	0.0	0.0	0.0	0.0	0.0	0.0	0.0	0.0	0.0	0.0	0.0	0.0	0.0	0.0	0.0	0.0	0.0
PAS4_180723_451_A01	0.0	0.0	0.0	0.0	0.0	0.01	0.18	0.0	0.0	0.0	0.0	0.07	0.0	0.03	0.0	0.0	0.0	0.0	0.0	0.0	0.0	0.0	0.0	0.0	0.0	0.0	0.01	0.01	0.0	0.0	0.0	0.0	0.0	0.0	0.0	0.0	0.0	0.0	0.0	0.0	0.0	0.0	0.0	0.0	0.0	0.0	0.0	0.0	0.0
P9S4_180406_404_A01	0.02	0.0	0.0	0.01	0.07	0.0	0.2	0.0	0.0	0.0	0.07	0.06	0.0	0.0	0.0	0.0	0.02	0.0	0.01	0.01	0.01	0.0	0.0	0.0	0.0	0.0	0.0	0.0	0.07	0.0	0.0	0.0	0.0	0.0	0.0	0.0	0.0	0.0	0.0	0.0	0.0	0.0	0.01	0.0	0.0	0.0	0.0	0.0	0.0
P8S4_180905_353_A01	0.1	0.0	0.0	0.03	0.0	0.0	0.2	0.04	0.0	0.0	0.07	0.0	0.0	0.0	0.0	0.0	0.0	0.0	0.0	0.01	0.0	0.0	0.0	0.0	0.0	0.0	0.0	0.0	0.01	0.0	0.0	0.0	0.0	0.05	0.05	0.07	0.0	0.0	0.07	0.07	0.0	0.0	0.1	0.0	0.0	0.0	0.13	0.0	0.0
PAS4_180723_452_A01	0.0	0.0	0.0	0.0	0.0	0.0	0.24	0.01	0.0	0.0	0.01	0.0	0.04	0.08	0.0	0.0	0.0	0.0	0.0	0.01	0.01	0.0	0.0	0.0	0.0	0.0	0.0	0.01	0.0	0.0	0.0	0.04	0.04	0.01	0.02	0.0	0.0	0.0	0.0	0.0	0.0	0.0	0.0	0.0	0.0	0.0	0.0	0.03	0.0
P9S4_171016_406_A01	0.01	0.0	0.0	0.0	0.0	0.0	0.26	0.0	0.0	0.0	0.0	0.0	0.0	0.0	0.0	0.0	0.0	0.0	0.0	0.0	0.0	0.0	0.0	0.0	0.0	0.0	0.0	0.0	0.0	0.0	0.0	0.0	0.0	0.0	0.0	0.0	0.01	0.0	0.0	0.0	0.0	0.0	0.0	0.0	0.0	0.0	0.02	0.0	0.0
P1S4_190104_001_A01	0.01	0.06	0.0	0.03	0.0	0.0	0.26	0.04	0.01	0.0	0.09	0.0	0.01	0.0	0.0	0.0	0.0	0.0	0.0	0.0	0.0	0.0	0.0	0.0	0.0	0.0	0.0	0.0	0.0	0.0	0.01	0.0	0.04	0.05	0.02	0.03	0.04	0.02	0.01	0.0	0.05	0.0	0.1	0.01	0.01	0.01	0.0	0.0	0.0
PAS4_180911_454_A01	0.15	0.0	0.0	0.14	0.2	0.22	0.29	0.0	0.0	0.0	0.0	0.0	0.0	0.0	0.0	0.0	0.0	0.0	0.0	0.0	0.0	0.0	0.0	0.0	0.0	0.0	0.0	0.0	0.0	0.0	0.0	0.0	0.0	0.0	0.0	0.0	0.0	0.0	0.0	0.0	0.0	0.0	0.0	0.0	0.0	0.0	0.0	0.0	0.0
PBS4_180319_505_A01	0.06	0.0	0.0	0.03	0.22	0.05	0.33	0.0	0.0	0.0	0.0	0.29	0.02	0.0	0.0	0.0	0.0	0.0	0.0	0.0	0.0	0.0	0.0	0.0	0.0	0.0	0.0	0.0	0.0	0.0	0.0	0.0	0.0	0.0	0.0	0.0	0.0	0.0	0.0	0.0	0.0	0.0	0.0	0.0	0.0	0.0	0.0	0.0	0.0
P1S4_190930_001_A01	0.0	0.0	0.0	0.0	0.0	0.0	0.37	0.0	0.0	0.0	0.0	0.0	0.0	0.0	0.0	0.0	0.0	0.0	0.0	0.0	0.0	0.0	0.0	0.0	0.0	0.0	0.0	0.0	0.0	0.0	0.05	0.03	0.1	0.07	0.04	0.0	0.0	0.0	0.0	0.0	0.0	0.01	0.0	0.0	0.0	0.0	0.0	0.0	0.0
PAS4_181012_455_A01	0.0	0.0	0.01	0.0	0.0	0.01	0.37	0.04	0.0	0.0	0.03	0.0	0.02	0.0	0.0	0.0	0.0	0.0	0.0	0.0	0.0	0.0	0.0	0.0	0.0	0.0	0.0	0.0	0.0	0.0	0.0	0.0	0.0	0.0	0.0	0.0	0.0	0.0	0.0	0.0	0.0	0.0	0.0	0.0	0.0	0.0	0.0	0.0	0.0
P9S4_171003_402_A01	0.0	0.0	0.0	0.0	0.0	0.4	0.46	0.0	0.0	0.0	0.0	0.0	0.0	0.0	0.0	0.0	0.0	0.0	0.0	0.0	0.0	0.0	0.0	0.0	0.0	0.0	0.0	0.0	0.0	0.0	0.0	0.01	0.03	0.0	0.0	0.0	0.03	0.0	0.0	0.0	0.0	0.0	0.01	0.0	0.0	0.0	0.0	0.0	0.0
P1S4_190524_001_A01	0.01	0.0	0.0	0.0	0.0	0.0	0.5	0.0	0.0	0.0	0.01	0.0	0.0	0.0	0.0	0.0	0.0	0.0	0.0	0.0	0.0	0.0	0.02	0.0	0.02	0.01	0.01	0.07	0.0	0.0	0.0	0.0	0.0	0.0	0.0	0.0	0.0	0.0	0.0	0.0	0.0	0.0	0.0	0.0	0.0	0.0	0.0	0.0	0.0
P8S4_171003_352_A01	0.24	0.0	0.0	0.01	0.23	0.0	0.52	0.0	0.0	0.0	0.0	0.0	0.0	0.0	0.0	0.0	0.0	0.0	0.0	0.0	0.0	0.0	0.0	0.0	0.0	0.0	0.0	0.0	0.0	0.0	0.0	0.0	0.0	0.0	0.0	0.0	0.0	0.0	0.0	0.0	0.0	0.0	0.0	0.0	0.0	0.0	0.0	0.0	0.0
PAS4_180419_451_A01	0.01	0.0	0.0	0.0	0.0	0.11	0.53	0.0	0.0	0.0	0.0	0.11	0.0	0.04	0.0	0.01	0.0	0.0	0.0	0.0	0.0	0.0	0.0	0.0	0.0	0.0	0.0	0.01	0.01	0.0	0.0	0.0	0.0	0.0	0.0	0.0	0.0	0.0	0.0	0.0	0.0	0.0	0.0	0.0	0.0	0.0	0.0	0.0	0.0
PAS4_180501_455_A01	0.0	0.0	0.0	0.0	0.0	0.02	0.57	0.0	0.0	0.0	0.03	0.0	0.03	0.01	0.0	0.0	0.0	0.0	0.01	0.0	0.0	0.01	0.01	0.02	0.0	0.02	0.0	0.04	0.0	0.0	0.03	0.0	0.01	0.0	0.03	0.0	0.0	0.0	0.0	0.0	0.0	0.0	0.0	0.0	0.0	0.02	0.0	0.0	0.0
P8S4_171024_354_A01	0.05	0.0	0.0	0.0	0.0	0.16	0.79	0.0	0.0	0.0	0.0	0.0	0.0	0.0	0.0	0.0	0.0	0.0	0.0	0.0	0.0	0.0	0.0	0.0	0.0	0.0	0.0	0.0	0.0	0.0	0.0	0.0	0.0	0.0	0.0	0.0	0.0	0.0	0.0	0.0	0.0	0.0	0.0	0.0	0.0	0.0	0.0	0.0	0.0
PAS4_180228_452_A01	0.0	0.0	0.0	0.0	0.0	0.0	1.0	0.0	0.0	0.0	0.0	0.0	0.0	0.0	0.0	0.0	0.0	0.0	0.0	0.0	0.0	0.0	0.0	0.0	0.0	0.0	0.0	0.0	0.0	0.0	0.0	0.0	0.0	0.0	0.0	0.0	0.0	0.0	0.0	0.0	0.0	0.0	0.0	0.0	0.0	0.0	0.0	0.0	0.0
P2S4_180618_056_A01	0.02	0.0	0.0	0.0	0.07	0.09	0.05	0.01	0.0	0.0	0.05	0.0	0.0	0.0	0.0	0.0	0.0	0.0	0.0	0.0	0.0	0.0	0.0	0.0	0.0	0.0	0.0	0.0	0.0	0.0	0.06	0.0	0.06	0.02	0.03	0.09	0.03	0.0	0.06	0.03	0.05	0.07	0.0	0.09	0.0	0.0	0.0	0.02	0.0
PBS4_181016_501_A01	0.03	0.02	0.05	0.02	0.05	0.16	0.0	0.0	0.0	0.0	0.0	0.0	0.09	0.0	0.01	0.0	0.0	0.0	0.0	0.0	0.0	0.0	0.0	0.0	0.0	0.0	0.0	0.0	0.0	0.09	0.0	0.0	0.0	0.0	0.01	0.0	0.0	0.01	0.0	0.0	0.02	0.0	0.01	0.01	0.0	0.0	0.0	0.0	0.01
P9S4_171115_407_A01	0.08	0.0	0.02	0.08	0.0	0.18	0.01	0.07	0.0	0.0	0.11	0.03	0.15	0.07	0.0	0.01	0.0	0.0	0.01	0.0	0.0	0.0	0.02	0.0	0.0	0.01	0.0	0.0	0.0	0.0	0.01	0.0	0.0	0.0	0.0	0.02	0.01	0.0	0.01	0.02	0.0	0.0	0.01	0.0	0.0	0.0	0.01	0.03	0.0
PBS4_171117_501_A01	0.0	0.0	0.18	0.12	0.01	0.23	0.0	0.0	0.0	0.0	0.0	0.0	0.0	0.09	0.1	0.03	0.02	0.0	0.05	0.01	0.0	0.01	0.0	0.0	0.01	0.01	0.04	0.0	0.09	0.0	0.0	0.0	0.0	0.0	0.0	0.0	0.0	0.0	0.0	0.0	0.0	0.0	0.0	0.0	0.0	0.0	0.0	0.0	0.0
PBS4_180124_502_A01	0.0	0.06	0.0	0.01	0.06	0.26	0.15	0.0	0.0	0.0	0.02	0.0	0.03	0.0	0.0	0.0	0.0	0.01	0.0	0.0	0.01	0.0	0.0	0.0	0.0	0.0	0.0	0.0	0.0	0.0	0.0	0.0	0.01	0.0	0.01	0.0	0.01	0.0	0.0	0.0	0.0	0.01	0.0	0.0	0.0	0.0	0.0	0.01	0.0
P1S4_180316_003_A01	0.2	0.0	0.0	0.02	0.0	0.26	0.0	0.0	0.0	0.0	0.0	0.02	0.03	0.0	0.0	0.0	0.0	0.0	0.0	0.0	0.0	0.0	0.0	0.0	0.0	0.0	0.0	0.0	0.0	0.0	0.0	0.01	0.03	0.04	0.02	0.05	0.04	0.0	0.0	0.03	0.03	0.01	0.04	0.0	0.01	0.02	0.01	0.01	0.0
PAS4_180601_453_A01	0.0	0.0	0.0	0.0	0.0	0.28	0.24	0.0	0.0	0.0	0.0	0.15	0.28	0.0	0.0	0.0	0.0	0.0	0.0	0.0	0.0	0.0	0.0	0.0	0.0	0.0	0.0	0.0	0.0	0.0	0.0	0.0	0.0	0.0	0.0	0.0	0.0	0.0	0.0	0.0	0.0	0.0	0.0	0.0	0.0	0.0	0.0	0.0	0.0
PBS4_180416_509_A01	0.09	0.0	0.0	0.22	0.0	0.29	0.17	0.0	0.0	0.0	0.0	0.0	0.02	0.0	0.0	0.0	0.0	0.0	0.0	0.0	0.0	0.0	0.0	0.0	0.0	0.0	0.0	0.0	0.0	0.0	0.0	0.05	0.0	0.0	0.0	0.0	0.01	0.0	0.0	0.0	0.0	0.0	0.01	0.0	0.0	0.0	0.02	0.0	0.01
PBS4_171011_501_A01	0.29	0.0	0.0	0.01	0.04	0.31	0.0	0.0	0.0	0.0	0.0	0.0	0.0	0.0	0.0	0.0	0.0	0.0	0.0	0.0	0.0	0.0	0.0	0.0	0.0	0.0	0.0	0.0	0.0	0.0	0.0	0.0	0.0	0.0	0.0	0.0	0.0	0.0	0.0	0.0	0.0	0.0	0.0	0.0	0.0	0.0	0.0	0.0	0.0
P8S4_171006_357_A01	0.15	0.0	0.0	0.13	0.0	0.34	0.01	0.0	0.0	0.0	0.0	0.0	0.0	0.0	0.0	0.0	0.0	0.0	0.0	0.0	0.0	0.0	0.0	0.0	0.0	0.0	0.0	0.0	0.0	0.0	0.0	0.0	0.0	0.0	0.0	0.0	0.0	0.0	0.0	0.0	0.0	0.0	0.0	0.0	0.0	0.0	0.0	0.0	0.0
P9S4_180316_403_A01	0.07	0.0	0.0	0.0	0.09	0.39	0.06	0.0	0.0	0.0	0.0	0.0	0.01	0.0	0.0	0.0	0.0	0.0	0.0	0.0	0.0	0.0	0.0	0.0	0.0	0.0	0.0	0.0	0.0	0.0	0.01	0.02	0.02	0.01	0.02	0.0	0.0	0.02	0.0	0.0	0.03	0.0	0.03	0.01	0.0	0.02	0.02	0.0	0.02
PAS4_180124_453_A01	0.0	0.02	0.3	0.22	0.0	0.41	0.05	0.0	0.0	0.0	0.0	0.0	0.0	0.0	0.0	0.0	0.0	0.0	0.0	0.0	0.0	0.0	0.0	0.0	0.0	0.0	0.0	0.0	0.0	0.0	0.0	0.0	0.0	0.0	0.0	0.0	0.0	0.0	0.0	0.0	0.0	0.0	0.0	0.0	0.0	0.0	0.0	0.0	0.0
PBS4_180320_502_A01	0.1	0.0	0.0	0.23	0.18	0.44	0.0	0.0	0.0	0.0	0.0	0.0	0.0	0.0	0.0	0.0	0.0	0.0	0.0	0.0	0.0	0.0	0.0	0.0	0.0	0.0	0.0	0.0	0.0	0.0	0.0	0.0	0.0	0.0	0.0	0.0	0.01	0.0	0.0	0.0	0.0	0.0	0.0	0.0	0.0	0.0	0.0	0.0	0.0
PBS4_180411_504_A01	0.0	0.01	0.09	0.1	0.11	0.46	0.0	0.0	0.0	0.0	0.1	0.01	0.12	0.0	0.0	0.0	0.0	0.0	0.0	0.0	0.0	0.0	0.0	0.0	0.0	0.0	0.0	0.0	0.0	0.0	0.0	0.0	0.0	0.0	0.0	0.0	0.0	0.0	0.0	0.0	0.0	0.0	0.0	0.0	0.0	0.0	0.0	0.0	0.0
P9S4_180207_403_A01	0.01	0.0	0.0	0.05	0.43	0.48	0.03	0.0	0.0	0.0	0.0	0.0	0.0	0.0	0.0	0.0	0.0	0.0	0.0	0.0	0.0	0.0	0.0	0.0	0.0	0.0	0.0	0.0	0.0	0.0	0.0	0.0	0.0	0.0	0.0	0.0	0.0	0.0	0.0	0.0	0.0	0.0	0.0	0.0	0.0	0.0	0.0	0.0	0.0
P1S4_190225_002_A01	0.3	0.0	0.0	0.2	0.0	0.49	0.0	0.0	0.0	0.0	0.0	0.0	0.0	0.0	0.0	0.0	0.0	0.0	0.0	0.0	0.0	0.0	0.0	0.0	0.0	0.0	0.0	0.0	0.0	0.0	0.0	0.0	0.0	0.0	0.0	0.0	0.0	0.0	0.0	0.0	0.0	0.0	0.0	0.0	0.0	0.0	0.0	0.0	0.0
P1S4_180410_003_A01	0.0	0.04	0.17	0.02	0.24	0.51	0.0	0.0	0.0	0.0	0.0	0.0	0.02	0.0	0.0	0.0	0.0	0.0	0.0	0.0	0.0	0.0	0.0	0.0	0.0	0.0	0.0	0.0	0.0	0.0	0.0	0.0	0.0	0.0	0.0	0.0	0.0	0.0	0.0	0.0	0.0	0.0	0.0	0.0	0.0	0.0	0.0	0.0	0.0
P8S4_180321_353_A01	0.0	0.0	0.0	0.02	0.0	0.54	0.44	0.0	0.0	0.0	0.0	0.0	0.0	0.0	0.0	0.0	0.0	0.0	0.0	0.0	0.0	0.0	0.0	0.0	0.0	0.0	0.0	0.0	0.0	0.0	0.0	0.0	0.0	0.0	0.0	0.0	0.0	0.0	0.0	0.0	0.0	0.0	0.0	0.0	0.0	0.0	0.0	0.0	0.0
P8S4_171211_354_A01	0.0	0.0	0.0	0.04	0.39	0.57	0.0	0.0	0.0	0.0	0.0	0.0	0.0	0.0	0.0	0.0	0.0	0.0	0.0	0.0	0.0	0.0	0.0	0.0	0.0	0.0	0.0	0.0	0.0	0.0	0.0	0.0	0.0	0.0	0.0	0.0	0.0	0.0	0.0	0.0	0.0	0.0	0.0	0.0	0.0	0.0	0.0	0.0	0.0
PAS4_180523_452_A01	0.07	0.0	0.0	0.12	0.0	0.66	0.12	0.0	0.0	0.0	0.0	0.0	0.03	0.0	0.0	0.0	0.0	0.0	0.0	0.0	0.0	0.0	0.0	0.0	0.0	0.0	0.0	0.0	0.0	0.0	0.0	0.0	0.0	0.0	0.0	0.0	0.0	0.0	0.0	0.0	0.0	0.0	0.0	0.0	0.0	0.0	0.0	0.0	0.0
P9S4_180806_402_A01	0.0	0.0	0.0	0.0	0.0	0.67	0.29	0.0	0.0	0.0	0.0	0.0	0.0	0.0	0.04	0.0	0.0	0.0	0.0	0.0	0.0	0.0	0.0	0.0	0.0	0.0	0.0	0.0	0.0	0.0	0.0	0.0	0.0	0.0	0.0	0.0	0.0	0.0	0.0	0.0	0.0	0.0	0.0	0.0	0.0	0.0	0.0	0.0	0.0
PES4_181022_652_A01	0.0	0.0	0.0	0.01	0.1	0.89	0.0	0.0	0.0	0.0	0.0	0.0	0.0	0.0	0.0	0.0	0.0	0.0	0.0	0.0	0.0	0.0	0.0	0.0	0.0	0.0	0.0	0.0	0.0	0.0	0.0	0.0	0.0	0.0	0.0	0.0	0.0	0.0	0.0	0.0	0.0	0.0	0.0	0.0	0.0	0.0	0.0	0.0	0.0
P9S4_180201_401_A01	0.0	0.0	0.0	0.02	0.0	0.98	0.0	0.0	0.0	0.0	0.0	0.0	0.0	0.0	0.0	0.0	0.0	0.0	0.0	0.0	0.0	0.0	0.0	0.0	0.0	0.0	0.0	0.0	0.0	0.0	0.0	0.0	0.0	0.0	0.0	0.0	0.0	0.0	0.0	0.0	0.0	0.0	0.0	0.0	0.0	0.0	0.0	0.0	0.0
P8S4_171025_357_A01	0.0	0.0	0.0	0.0	0.0	1.0	0.0	0.0	0.0	0.0	0.0	0.0	0.0	0.0	0.0	0.0	0.0	0.0	0.0	0.0	0.0	0.0	0.0	0.0	0.0	0.0	0.0	0.0	0.0	0.0	0.0	0.0	0.0	0.0	0.0	0.0	0.0	0.0	0.0	0.0	0.0	0.0	0.0	0.0	0.0	0.0	0.0	0.0	0.0
PBS4_171115_502_A01	0.0	0.0	0.0	0.06	0.15	0.0	0.0	0.01	0.0	0.0	0.1	0.0	0.14	0.0	0.0	0.14	0.0	0.0	0.0	0.0	0.03	0.0	0.0	0.05	0.0	0.08	0.12	0.0	0.0	0.0	0.0	0.0	0.0	0.0	0.01	0.0	0.0	0.0	0.0	0.0	0.01	0.0	0.0	0.0	0.0	0.0	0.0	0.0	0.0
PBS4_171026_501_A01	0.01	0.0	0.07	0.04	0.15	0.02	0.09	0.0	0.0	0.0	0.05	0.09	0.11	0.01	0.02	0.0	0.0	0.0	0.01	0.0	0.0	0.0	0.0	0.0	0.0	0.0	0.0	0.0	0.01	0.0	0.0	0.0	0.0	0.0	0.0	0.0	0.0	0.0	0.0	0.0	0.01	0.0	0.0	0.0	0.0	0.0	0.0	0.0	0.0
P9S4_180302_404_A01	0.0	0.0	0.0	0.01	0.16	0.0	0.0	0.0	0.0	0.0	0.02	0.02	0.01	0.1	0.14	0.02	0.0	0.0	0.0	0.0	0.0	0.01	0.0	0.0	0.0	0.0	0.0	0.0	0.0	0.0	0.0	0.0	0.0	0.0	0.0	0.01	0.0	0.02	0.0	0.01	0.0	0.0	0.0	0.0	0.0	0.0	0.0	0.01	0.0
P8S4_180406_351_A01	0.0	0.01	0.02	0.08	0.16	0.0	0.04	0.0	0.04	0.03	0.05	0.0	0.02	0.0	0.0	0.0	0.0	0.0	0.0	0.0	0.0	0.0	0.0	0.0	0.0	0.0	0.0	0.0	0.0	0.0	0.01	0.02	0.06	0.0	0.05	0.04	0.02	0.0	0.0	0.0	0.02	0.0	0.03	0.02	0.0	0.0	0.01	0.0	0.02
PBS4_180117_501_A01	0.04	0.04	0.0	0.01	0.16	0.07	0.0	0.04	0.0	0.0	0.14	0.13	0.03	0.0	0.0	0.0	0.0	0.0	0.0	0.0	0.0	0.0	0.0	0.0	0.0	0.0	0.0	0.0	0.0	0.0	0.03	0.0	0.01	0.0	0.0	0.01	0.0	0.01	0.01	0.01	0.0	0.0	0.01	0.01	0.0	0.01	0.01	0.0	0.0
P2S4_180613_053_A01	0.18	0.1	0.01	0.09	0.19	0.0	0.0	0.02	0.04	0.12	0.12	0.0	0.01	0.0	0.0	0.0	0.0	0.0	0.0	0.0	0.0	0.0	0.0	0.0	0.0	0.0	0.0	0.0	0.0	0.0	0.0	0.0	0.0	0.0	0.0	0.0	0.0	0.0	0.0	0.0	0.0	0.0	0.0	0.0	0.0	0.0	0.0	0.01	0.0
P9S4_180424_402_A01	0.0	0.0	0.0	0.03	0.21	0.06	0.02	0.0	0.0	0.0	0.0	0.0	0.0	0.01	0.01	0.0	0.0	0.0	0.0	0.0	0.0	0.0	0.0	0.0	0.0	0.0	0.0	0.0	0.0	0.0	0.0	0.01	0.0	0.0	0.0	0.0	0.0	0.0	0.0	0.0	0.0	0.0	0.0	0.0	0.0	0.01	0.0	0.0	0.0
P9S4_180423_404_A01	0.06	0.0	0.0	0.07	0.21	0.0	0.0	0.0	0.0	0.0	0.0	0.2	0.03	0.12	0.12	0.03	0.08	0.0	0.0	0.0	0.0	0.01	0.0	0.0	0.0	0.07	0.0	0.0	0.0	0.0	0.0	0.0	0.0	0.0	0.0	0.0	0.0	0.0	0.0	0.0	0.0	0.0	0.0	0.0	0.0	0.0	0.0	0.0	0.0
P8S4_171117_352_A01	0.0	0.04	0.06	0.0	0.22	0.0	0.15	0.0	0.0	0.0	0.02	0.0	0.06	0.13	0.0	0.13	0.0	0.0	0.0	0.0	0.0	0.05	0.0	0.02	0.0	0.06	0.0	0.0	0.0	0.0	0.0	0.0	0.0	0.0	0.0	0.0	0.0	0.0	0.0	0.0	0.0	0.0	0.0	0.0	0.0	0.0	0.0	0.0	0.0
PBS4_180416_505_A01	0.07	0.0	0.0	0.0	0.24	0.0	0.01	0.01	0.0	0.0	0.01	0.02	0.03	0.0	0.0	0.0	0.0	0.0	0.0	0.0	0.0	0.0	0.0	0.0	0.0	0.0	0.0	0.0	0.0	0.0	0.0	0.05	0.02	0.02	0.01	0.0	0.0	0.0	0.0	0.0	0.0	0.0	0.0	0.02	0.01	0.03	0.0	0.0	0.02
P9S4_180207_405_A01	0.03	0.0	0.02	0.09	0.25	0.0	0.0	0.02	0.0	0.0	0.01	0.05	0.06	0.01	0.12	0.07	0.0	0.0	0.0	0.0	0.0	0.0	0.0	0.0	0.0	0.03	0.0	0.0	0.01	0.0	0.0	0.0	0.0	0.0	0.0	0.0	0.0	0.0	0.0	0.0	0.0	0.0	0.0	0.0	0.0	0.0	0.0	0.0	0.0
P8S4_180321_355_A01	0.11	0.0	0.0	0.14	0.25	0.0	0.0	0.0	0.04	0.02	0.07	0.24	0.0	0.0	0.0	0.01	0.01	0.0	0.0	0.0	0.04	0.03	0.0	0.0	0.0	0.0	0.0	0.0	0.0	0.0	0.0	0.0	0.0	0.01	0.0	0.0	0.0	0.01	0.0	0.0	0.0	0.0	0.0	0.0	0.0	0.0	0.0	0.0	0.01
P8S4_171009_356_A01	0.06	0.0	0.0	0.19	0.28	0.03	0.08	0.0	0.0	0.0	0.0	0.21	0.03	0.0	0.0	0.0	0.0	0.0	0.0	0.0	0.0	0.0	0.0	0.0	0.0	0.0	0.0	0.0	0.0	0.0	0.0	0.0	0.0	0.0	0.0	0.02	0.0	0.0	0.0	0.0	0.0	0.0	0.0	0.01	0.0	0.0	0.0	0.02	0.01
PBS4_171201_507_A01	0.13	0.01	0.0	0.0	0.32	0.28	0.13	0.0	0.0	0.0	0.02	0.0	0.03	0.0	0.0	0.0	0.0	0.0	0.0	0.0	0.0	0.0	0.0	0.0	0.0	0.0	0.0	0.0	0.0	0.0	0.0	0.0	0.0	0.0	0.0	0.0	0.0	0.0	0.0	0.0	0.0	0.0	0.0	0.0	0.0	0.0	0.0	0.0	0.0
P8S4_171012_352_A01	0.0	0.0	0.0	0.2	0.34	0.02	0.0	0.0	0.0	0.0	0.0	0.0	0.0	0.0	0.0	0.0	0.0	0.02	0.0	0.0	0.0	0.0	0.0	0.0	0.0	0.0	0.0	0.0	0.0	0.0	0.0	0.02	0.04	0.04	0.02	0.02	0.0	0.0	0.0	0.0	0.0	0.0	0.0	0.0	0.0	0.0	0.0	0.0	0.0
PAS4_181017_453_A01	0.07	0.0	0.0	0.04	0.36	0.11	0.35	0.0	0.0	0.0	0.0	0.0	0.0	0.0	0.0	0.0	0.0	0.0	0.0	0.0	0.0	0.0	0.0	0.0	0.0	0.0	0.0	0.0	0.0	0.0	0.0	0.0	0.01	0.03	0.0	0.01	0.0	0.0	0.01	0.0	0.0	0.0	0.0	0.0	0.0	0.0	0.0	0.0	0.0
P8S4_180418_355_A01	0.0	0.0	0.0	0.05	0.39	0.29	0.01	0.02	0.01	0.06	0.12	0.0	0.05	0.0	0.0	0.0	0.0	0.0	0.0	0.0	0.0	0.0	0.0	0.0	0.0	0.0	0.0	0.0	0.0	0.0	0.0	0.0	0.0	0.0	0.0	0.0	0.0	0.0	0.0	0.0	0.0	0.0	0.0	0.0	0.0	0.0	0.0	0.0	0.0
P2S4_171222_051_A01	0.0	0.0	0.13	0.19	0.48	0.0	0.0	0.0	0.0	0.0	0.0	0.0	0.0	0.0	0.0	0.0	0.0	0.0	0.0	0.0	0.0	0.0	0.0	0.0	0.0	0.0	0.0	0.0	0.0	0.0	0.0	0.0	0.0	0.0	0.0	0.0	0.0	0.0	0.0	0.0	0.0	0.0	0.0	0.0	0.0	0.0	0.0	0.0	0.0
P9S4_180123_403_A01	0.0	0.0	0.0	0.47	0.51	0.0	0.0	0.0	0.0	0.0	0.0	0.0	0.0	0.0	0.0	0.0	0.0	0.0	0.0	0.0	0.0	0.0	0.0	0.0	0.0	0.0	0.0	0.0	0.0	0.0	0.01	0.0	0.0	0.0	0.0	0.0	0.0	0.0	0.0	0.0	0.0	0.0	0.0	0.0	0.0	0.0	0.01	0.0	0.0
PBS4_180529_505_A01	0.0	0.0	0.0	0.0	0.56	0.0	0.0	0.01	0.0	0.0	0.01	0.0	0.02	0.0	0.0	0.0	0.0	0.0	0.0	0.0	0.0	0.0	0.0	0.0	0.0	0.0	0.0	0.0	0.0	0.0	0.02	0.0	0.0	0.0	0.0	0.0	0.0	0.0	0.0	0.0	0.0	0.0	0.0	0.0	0.01	0.0	0.0	0.0	0.37
P8S4_171115_356_A01	0.0	0.02	0.01	0.31	0.6	0.0	0.0	0.0	0.0	0.0	0.0	0.0	0.0	0.0	0.05	0.0	0.0	0.0	0.0	0.0	0.0	0.0	0.0	0.0	0.0	0.0	0.0	0.0	0.0	0.0	0.0	0.0	0.0	0.0	0.0	0.0	0.0	0.0	0.0	0.0	0.0	0.0	0.0	0.0	0.0	0.0	0.0	0.0	0.0
P8S4_171024_357_A01	0.0	0.0	0.0	0.04	0.63	0.0	0.0	0.0	0.0	0.0	0.0	0.0	0.0	0.29	0.0	0.01	0.0	0.0	0.0	0.0	0.0	0.0	0.0	0.0	0.0	0.0	0.0	0.0	0.0	0.0	0.0	0.0	0.0	0.0	0.0	0.0	0.0	0.01	0.0	0.0	0.0	0.0	0.0	0.0	0.0	0.0	0.0	0.0	0.0
P9S4_180807_413_A01	0.0	0.0	0.0	0.3	0.7	0.0	0.0	0.0	0.0	0.0	0.0	0.0	0.0	0.0	0.0	0.0	0.0	0.0	0.0	0.0	0.0	0.0	0.0	0.0	0.0	0.0	0.0	0.0	0.0	0.0	0.0	0.0	0.0	0.0	0.0	0.0	0.0	0.0	0.0	0.0	0.0	0.0	0.0	0.0	0.0	0.0	0.0	0.0	0.0
P9S4_180108_406_A01	0.0	0.07	0.18	0.04	0.71	0.0	0.0	0.0	0.0	0.0	0.0	0.0	0.0	0.0	0.0	0.0	0.0	0.0	0.0	0.0	0.0	0.0	0.0	0.0	0.0	0.0	0.0	0.0	0.0	0.0	0.0	0.0	0.0	0.0	0.0	0.0	0.0	0.0	0.0	0.0	0.0	0.0	0.0	0.0	0.0	0.0	0.0	0.0	0.0
P8S4_180321_352_A01	0.0	0.0	0.04	0.11	0.72	0.0	0.0	0.0	0.0	0.0	0.0	0.0	0.0	0.0	0.0	0.0	0.0	0.0	0.0	0.0	0.0	0.0	0.0	0.0	0.0	0.0	0.0	0.0	0.0	0.0	0.0	0.0	0.0	0.0	0.0	0.0	0.0	0.0	0.0	0.0	0.0	0.0	0.0	0.0	0.0	0.0	0.0	0.0	0.0
P1S4_180327_004_A01	0.0	0.0	0.0	0.22	0.78	0.0	0.0	0.0	0.0	0.0	0.0	0.0	0.0	0.0	0.0	0.0	0.0	0.0	0.0	0.0	0.0	0.0	0.0	0.0	0.0	0.0	0.0	0.0	0.0	0.0	0.0	0.0	0.0	0.0	0.0	0.0	0.0	0.0	0.0	0.0	0.0	0.0	0.0	0.0	0.0	0.0	0.0	0.0	0.0
P8S4_171023_355_A01	0.03	0.01	0.01	0.02	0.79	0.13	0.01	0.0	0.0	0.0	0.0	0.0	0.0	0.0	0.0	0.0	0.0	0.0	0.0	0.0	0.0	0.0	0.0	0.0	0.0	0.0	0.0	0.0	0.0	0.0	0.0	0.0	0.0	0.0	0.0	0.0	0.0	0.0	0.0	0.0	0.0	0.0	0.0	0.0	0.0	0.0	0.0	0.0	0.0
P1S4_180226_003_A01	0.0	0.0	0.0	0.08	0.87	0.0	0.0	0.0	0.0	0.0	0.0	0.0	0.0	0.0	0.0	0.0	0.0	0.0	0.0	0.0	0.0	0.0	0.0	0.0	0.0	0.0	0.0	0.0	0.0	0.0	0.01	0.0	0.0	0.0	0.0	0.01	0.0	0.0	0.0	0.0	0.0	0.0	0.0	0.0	0.0	0.0	0.0	0.0	0.0
P9S4_180227_403_A01	0.0	0.0	0.0	0.11	0.0	0.08	0.0	0.0	0.0	0.0	0.06	0.0	0.03	0.01	0.03	0.01	0.0	0.0	0.03	0.0	0.03	0.0	0.0	0.02	0.05	0.02	0.0	0.0	0.02	0.0	0.0	0.07	0.04	0.03	0.03	0.0	0.0	0.0	0.0	0.01	0.01	0.0	0.02	0.01	0.02	0.02	0.0	0.0	0.02
P9S4_171107_404_A01	0.0	0.0	0.0	0.14	0.0	0.0	0.0	0.0	0.0	0.0	0.0	0.0	0.08	0.0	0.0	0.0	0.04	0.02	0.0	0.0	0.06	0.0	0.0	0.0	0.0	0.02	0.0	0.01	0.05	0.0	0.0	0.05	0.01	0.05	0.01	0.06	0.0	0.04	0.0	0.04	0.01	0.01	0.02	0.0	0.02	0.04	0.03	0.0	0.02
P9S4_180307_402_A01	0.0	0.0	0.0	0.19	0.12	0.0	0.0	0.0	0.0	0.0	0.11	0.0	0.0	0.15	0.09	0.02	0.0	0.0	0.0	0.0	0.0	0.02	0.01	0.01	0.0	0.06	0.0	0.0	0.0	0.0	0.0	0.04	0.01	0.01	0.0	0.03	0.0	0.0	0.0	0.02	0.0	0.0	0.02	0.01	0.0	0.0	0.01	0.0	0.0
P8S4_191121_351_A01	0.0	0.0	0.0	0.19	0.11	0.0	0.0	0.0	0.0	0.0	0.0	0.0	0.0	0.01	0.0	0.0	0.09	0.0	0.0	0.0	0.0	0.0	0.0	0.0	0.0	0.02	0.0	0.0	0.0	0.08	0.02	0.03	0.01	0.0	0.02	0.03	0.0	0.0	0.0	0.0	0.01	0.0	0.02	0.01	0.0	0.0	0.0	0.02	0.0
P8S4_180410_353_A01	0.17	0.0	0.0	0.2	0.0	0.01	0.06	0.0	0.0	0.0	0.05	0.04	0.01	0.0	0.1	0.01	0.0	0.0	0.01	0.0	0.0	0.0	0.0	0.01	0.0	0.01	0.06	0.01	0.01	0.0	0.0	0.0	0.0	0.0	0.01	0.03	0.01	0.0	0.0	0.01	0.0	0.01	0.02	0.01	0.0	0.0	0.0	0.0	0.0
P9S4_180313_405_A01	0.0	0.11	0.0	0.21	0.0	0.05	0.19	0.0	0.0	0.0	0.0	0.0	0.02	0.0	0.0	0.0	0.0	0.0	0.01	0.0	0.0	0.0	0.0	0.0	0.0	0.0	0.0	0.0	0.01	0.0	0.0	0.0	0.0	0.0	0.0	0.0	0.0	0.0	0.0	0.0	0.0	0.0	0.0	0.0	0.0	0.0	0.0	0.0	0.0
PBS4_180226_503_A01	0.0	0.0	0.0	0.23	0.1	0.0	0.0	0.0	0.17	0.02	0.12	0.0	0.0	0.14	0.0	0.03	0.01	0.0	0.0	0.0	0.0	0.02	0.0	0.0	0.0	0.02	0.0	0.0	0.09	0.0	0.0	0.01	0.0	0.0	0.0	0.0	0.0	0.0	0.0	0.0	0.0	0.0	0.0	0.0	0.0	0.02	0.0	0.0	0.0
PBS4_181002_516_A01	0.07	0.0	0.0	0.24	0.03	0.0	0.0	0.0	0.03	0.0	0.03	0.03	0.03	0.0	0.0	0.0	0.0	0.0	0.0	0.0	0.0	0.0	0.0	0.0	0.0	0.0	0.0	0.0	0.0	0.08	0.0	0.0	0.0	0.03	0.02	0.01	0.0	0.0	0.0	0.06	0.03	0.02	0.05	0.0	0.0	0.0	0.0	0.0	0.01
PAS4_180327_453_A01	0.01	0.01	0.02	0.24	0.23	0.0	0.0	0.16	0.0	0.0	0.07	0.03	0.19	0.0	0.02	0.0	0.0	0.0	0.0	0.0	0.0	0.0	0.0	0.01	0.0	0.01	0.0	0.0	0.0	0.0	0.0	0.0	0.0	0.0	0.0	0.0	0.0	0.0	0.0	0.0	0.0	0.0	0.0	0.0	0.0	0.0	0.0	0.0	0.0
P8S4_180402_351_A01	0.0	0.0	0.0	0.27	0.0	0.0	0.0	0.0	0.0	0.0	0.01	0.0	0.0	0.0	0.0	0.09	0.0	0.0	0.0	0.0	0.0	0.02	0.02	0.0	0.0	0.09	0.0	0.01	0.0	0.0	0.0	0.01	0.02	0.04	0.03	0.06	0.01	0.04	0.0	0.03	0.0	0.0	0.07	0.01	0.03	0.0	0.02	0.0	0.01
P8S4_171012_351_A01	0.0	0.0	0.0	0.27	0.0	0.0	0.03	0.01	0.0	0.0	0.01	0.0	0.11	0.1	0.06	0.08	0.01	0.0	0.0	0.0	0.0	0.01	0.0	0.0	0.0	0.04	0.0	0.0	0.0	0.0	0.0	0.01	0.0	0.01	0.03	0.04	0.0	0.0	0.0	0.0	0.0	0.0	0.02	0.0	0.0	0.0	0.02	0.0	0.0
P9S4_171026_401_A01	0.22	0.0	0.0	0.3	0.1	0.0	0.0	0.0	0.0	0.0	0.0	0.0	0.0	0.0	0.0	0.0	0.0	0.0	0.0	0.0	0.0	0.0	0.0	0.0	0.0	0.0	0.0	0.0	0.0	0.0	0.0	0.0	0.0	0.0	0.0	0.0	0.0	0.0	0.0	0.0	0.0	0.0	0.0	0.0	0.0	0.0	0.0	0.0	0.0
P1S4_190624_005_A01	0.0	0.0	0.0	0.3	0.0	0.15	0.08	0.0	0.0	0.0	0.0	0.0	0.0	0.09	0.0	0.12	0.0	0.02	0.0	0.01	0.0	0.0	0.0	0.0	0.0	0.02	0.01	0.0	0.01	0.0	0.0	0.0	0.0	0.0	0.0	0.0	0.0	0.0	0.0	0.0	0.0	0.0	0.0	0.0	0.0	0.0	0.0	0.0	0.0
PAS4_171027_451_A01	0.0	0.0	0.0	0.31	0.0	0.0	0.0	0.03	0.01	0.01	0.03	0.1	0.05	0.01	0.0	0.0	0.0	0.0	0.01	0.0	0.0	0.0	0.0	0.0	0.0	0.0	0.03	0.02	0.03	0.0	0.01	0.02	0.0	0.0	0.01	0.0	0.0	0.0	0.0	0.0	0.01	0.0	0.01	0.0	0.0	0.0	0.01	0.0	0.0
P2S4_180413_056_A01	0.0	0.0	0.0	0.31	0.19	0.09	0.11	0.0	0.0	0.0	0.0	0.04	0.0	0.04	0.05	0.01	0.0	0.0	0.0	0.0	0.0	0.0	0.0	0.0	0.0	0.0	0.01	0.04	0.01	0.06	0.0	0.0	0.0	0.0	0.0	0.0	0.0	0.0	0.0	0.0	0.0	0.0	0.0	0.0	0.0	0.0	0.0	0.0	0.0
P9S4_171004_408_A01	0.0	0.01	0.02	0.33	0.0	0.0	0.0	0.0	0.0	0.0	0.0	0.0	0.05	0.0	0.0	0.0	0.0	0.0	0.0	0.0	0.0	0.0	0.0	0.0	0.0	0.0	0.0	0.0	0.0	0.0	0.0	0.03	0.0	0.01	0.03	0.01	0.01	0.03	0.0	0.0	0.0	0.01	0.0	0.01	0.02	0.0	0.0	0.0	0.04
PBS4_171004_502_A01	0.02	0.03	0.1	0.34	0.0	0.0	0.0	0.1	0.0	0.0	0.08	0.0	0.22	0.07	0.0	0.0	0.0	0.0	0.0	0.0	0.0	0.0	0.0	0.0	0.0	0.0	0.0	0.01	0.0	0.0	0.0	0.0	0.0	0.0	0.0	0.0	0.0	0.01	0.0	0.0	0.0	0.0	0.0	0.0	0.0	0.0	0.0	0.0	0.0
PAS4_181130_452_A01	0.3	0.0	0.13	0.34	0.01	0.0	0.0	0.0	0.0	0.0	0.01	0.15	0.06	0.0	0.0	0.0	0.0	0.0	0.0	0.0	0.0	0.0	0.0	0.0	0.0	0.0	0.0	0.0	0.0	0.0	0.0	0.0	0.0	0.0	0.0	0.0	0.0	0.0	0.0	0.0	0.0	0.0	0.0	0.0	0.0	0.0	0.0	0.0	0.0
PAS4_200707_455_A01	0.0	0.0	0.0	0.36	0.08	0.0	0.0	0.0	0.0	0.0	0.0	0.0	0.0	0.0	0.0	0.0	0.0	0.0	0.0	0.0	0.01	0.0	0.17	0.05	0.0	0.0	0.03	0.01	0.01	0.0	0.0	0.01	0.02	0.0	0.01	0.03	0.0	0.04	0.0	0.0	0.0	0.0	0.0	0.04	0.01	0.0	0.0	0.0	0.02
P2S4_180321_051_A01	0.29	0.0	0.0	0.37	0.01	0.33	0.0	0.0	0.0	0.0	0.0	0.0	0.0	0.0	0.0	0.0	0.0	0.0	0.0	0.0	0.0	0.0	0.0	0.0	0.0	0.0	0.0	0.0	0.0	0.0	0.0	0.0	0.0	0.0	0.0	0.0	0.0	0.0	0.0	0.0	0.0	0.0	0.0	0.0	0.0	0.0	0.0	0.0	0.0
P1S4_180226_002_A01	0.01	0.02	0.06	0.4	0.0	0.0	0.0	0.0	0.0	0.0	0.0	0.0	0.0	0.13	0.38	0.0	0.0	0.0	0.0	0.0	0.0	0.0	0.0	0.0	0.0	0.0	0.0	0.0	0.0	0.0	0.0	0.0	0.0	0.0	0.0	0.0	0.0	0.0	0.0	0.0	0.0	0.0	0.0	0.0	0.0	0.0	0.0	0.0	0.0
P2S4_171019_052_A01	0.03	0.01	0.01	0.41	0.0	0.0	0.02	0.0	0.0	0.0	0.0	0.0	0.0	0.01	0.01	0.0	0.0	0.0	0.0	0.0	0.0	0.0	0.0	0.0	0.0	0.0	0.0	0.0	0.0	0.0	0.0	0.09	0.1	0.01	0.03	0.0	0.0	0.0	0.0	0.0	0.0	0.0	0.15	0.08	0.04	0.0	0.0	0.0	0.0
P8S4_171023_354_A01	0.0	0.25	0.24	0.49	0.0	0.0	0.0	0.0	0.0	0.0	0.0	0.0	0.0	0.0	0.0	0.01	0.0	0.0	0.0	0.0	0.0	0.0	0.0	0.0	0.0	0.0	0.0	0.0	0.0	0.0	0.0	0.0	0.01	0.0	0.0	0.0	0.0	0.0	0.0	0.0	0.0	0.0	0.0	0.0	0.0	0.0	0.0	0.0	0.0
P8S4_180914_356_A01	0.0	0.01	0.11	0.5	0.03	0.0	0.0	0.0	0.0	0.0	0.0	0.0	0.01	0.0	0.0	0.0	0.0	0.0	0.0	0.0	0.0	0.0	0.0	0.0	0.0	0.0	0.0	0.0	0.0	0.01	0.0	0.01	0.04	0.0	0.02	0.06	0.03	0.02	0.0	0.0	0.0	0.0	0.04	0.02	0.0	0.01	0.0	0.0	0.02
P9S4_171116_402_A01	0.0	0.0	0.0	0.56	0.0	0.0	0.0	0.0	0.01	0.0	0.03	0.0	0.1	0.0	0.0	0.01	0.0	0.0	0.02	0.0	0.0	0.01	0.01	0.0	0.01	0.01	0.0	0.0	0.02	0.0	0.01	0.01	0.01	0.0	0.0	0.0	0.0	0.0	0.0	0.0	0.0	0.0	0.0	0.0	0.0	0.0	0.0	0.0	0.01
PAS4_190219_455_A01	0.0	0.03	0.4	0.57	0.0	0.0	0.0	0.0	0.0	0.0	0.0	0.0	0.0	0.0	0.0	0.0	0.0	0.0	0.0	0.0	0.0	0.0	0.0	0.0	0.0	0.0	0.0	0.0	0.0	0.0	0.0	0.0	0.0	0.0	0.0	0.0	0.0	0.0	0.0	0.0	0.0	0.0	0.0	0.0	0.0	0.0	0.0	0.0	0.0
P8S4_180227_354_A01	0.0	0.0	0.0	0.59	0.0	0.0	0.0	0.01	0.0	0.0	0.04	0.0	0.2	0.03	0.0	0.0	0.01	0.0	0.0	0.0	0.0	0.0	0.0	0.0	0.0	0.0	0.0	0.0	0.01	0.0	0.0	0.0	0.04	0.0	0.01	0.0	0.0	0.0	0.0	0.0	0.0	0.0	0.0	0.0	0.0	0.01	0.02	0.0	0.0
P9S4_171116_403_A01	0.0	0.0	0.0	0.61	0.0	0.0	0.0	0.0	0.0	0.0	0.0	0.0	0.0	0.01	0.0	0.0	0.0	0.0	0.0	0.0	0.0	0.0	0.0	0.0	0.0	0.0	0.0	0.0	0.0	0.0	0.0	0.02	0.02	0.0	0.01	0.02	0.0	0.03	0.0	0.01	0.0	0.0	0.01	0.02	0.0	0.0	0.01	0.0	0.0
P9S4_171026_403_A01	0.0	0.0	0.03	0.65	0.0	0.12	0.03	0.0	0.0	0.0	0.0	0.0	0.0	0.0	0.03	0.02	0.0	0.0	0.0	0.0	0.0	0.0	0.0	0.01	0.0	0.0	0.0	0.0	0.0	0.0	0.0	0.01	0.01	0.0	0.01	0.0	0.0	0.0	0.0	0.0	0.0	0.0	0.0	0.0	0.0	0.0	0.0	0.0	0.0
P8S4_171115_354_A01	0.0	0.0	0.0	0.65	0.0	0.0	0.26	0.0	0.0	0.03	0.05	0.0	0.0	0.0	0.0	0.0	0.0	0.0	0.0	0.0	0.0	0.0	0.0	0.0	0.0	0.0	0.0	0.0	0.0	0.0	0.0	0.0	0.0	0.0	0.0	0.0	0.0	0.0	0.0	0.0	0.0	0.0	0.0	0.0	0.0	0.0	0.0	0.0	0.0
PAS4_190618_451_A01	0.0	0.0	0.0	0.68	0.01	0.31	0.0	0.0	0.0	0.0	0.0	0.0	0.0	0.0	0.0	0.0	0.0	0.0	0.0	0.0	0.0	0.0	0.0	0.0	0.0	0.0	0.0	0.0	0.0	0.0	0.0	0.0	0.0	0.0	0.0	0.0	0.0	0.0	0.0	0.0	0.0	0.0	0.0	0.0	0.0	0.0	0.0	0.0	0.0
PBS4_171116_504_A01	0.0	0.0	0.0	0.73	0.01	0.0	0.0	0.0	0.01	0.0	0.01	0.0	0.03	0.0	0.0	0.0	0.0	0.0	0.0	0.0	0.0	0.01	0.0	0.0	0.0	0.0	0.0	0.0	0.0	0.0	0.01	0.01	0.0	0.0	0.0	0.01	0.0	0.03	0.0	0.01	0.0	0.0	0.0	0.01	0.0	0.0	0.0	0.0	0.01
P8S4_180226_353_A01	0.0	0.0	0.0	0.74	0.26	0.0	0.0	0.0	0.0	0.0	0.0	0.0	0.0	0.0	0.0	0.0	0.0	0.0	0.0	0.0	0.0	0.0	0.0	0.0	0.0	0.0	0.0	0.0	0.0	0.0	0.0	0.0	0.0	0.0	0.0	0.0	0.0	0.0	0.0	0.0	0.0	0.0	0.0	0.0	0.0	0.0	0.0	0.0	0.0
P1S4_180307_002_A01	0.0	0.17	0.04	0.77	0.01	0.0	0.0	0.0	0.0	0.0	0.0	0.01	0.0	0.0	0.0	0.0	0.0	0.0	0.0	0.0	0.0	0.0	0.0	0.0	0.0	0.0	0.0	0.0	0.0	0.0	0.0	0.0	0.0	0.0	0.0	0.0	0.0	0.0	0.0	0.0	0.0	0.0	0.0	0.0	0.0	0.0	0.0	0.0	0.0
P8S4_171009_355_A01	0.0	0.0	0.0	0.83	0.0	0.09	0.01	0.0	0.0	0.0	0.0	0.0	0.0	0.0	0.0	0.0	0.0	0.0	0.0	0.0	0.0	0.0	0.0	0.0	0.0	0.0	0.0	0.0	0.0	0.0	0.0	0.0	0.0	0.0	0.0	0.0	0.0	0.0	0.0	0.0	0.0	0.0	0.0	0.0	0.0	0.0	0.0	0.0	0.0
PAS4_190618_453_A01	0.0	0.0	0.0	0.85	0.15	0.0	0.0	0.0	0.0	0.0	0.0	0.0	0.0	0.0	0.0	0.0	0.0	0.0	0.0	0.0	0.0	0.0	0.0	0.0	0.0	0.0	0.0	0.0	0.0	0.0	0.0	0.0	0.0	0.0	0.0	0.0	0.0	0.0	0.0	0.0	0.0	0.0	0.0	0.0	0.0	0.0	0.0	0.0	0.0
PBS4_180307_502_A01	0.0	0.0	0.0	0.92	0.0	0.0	0.0	0.0	0.0	0.0	0.0	0.0	0.0	0.06	0.02	0.0	0.0	0.0	0.0	0.0	0.0	0.0	0.0	0.0	0.0	0.0	0.0	0.0	0.0	0.0	0.0	0.0	0.0	0.0	0.0	0.0	0.0	0.0	0.0	0.0	0.0	0.0	0.0	0.0	0.0	0.0	0.0	0.0	0.0
PBS4_180418_506_A01	0.0	0.0	0.0	0.97	0.03	0.0	0.0	0.0	0.0	0.0	0.0	0.0	0.0	0.0	0.0	0.0	0.0	0.0	0.0	0.0	0.0	0.0	0.0	0.0	0.0	0.0	0.0	0.0	0.0	0.0	0.0	0.0	0.0	0.0	0.0	0.0	0.0	0.0	0.0	0.0	0.0	0.0	0.0	0.0	0.0	0.0	0.0	0.0	0.0
PBS4_180227_504_A01	0.0	0.0	0.0	1.0	0.0	0.0	0.0	0.0	0.0	0.0	0.0	0.0	0.0	0.0	0.0	0.0	0.0	0.0	0.0	0.0	0.0	0.0	0.0	0.0	0.0	0.0	0.0	0.0	0.0	0.0	0.0	0.0	0.0	0.0	0.0	0.0	0.0	0.0	0.0	0.0	0.0	0.0	0.0	0.0	0.0	0.0	0.0	0.0	0.0
PBS4_180227_506_A01	0.0	0.0	0.0	1.0	0.0	0.0	0.0	0.0	0.0	0.0	0.0	0.0	0.0	0.0	0.0	0.0	0.0	0.0	0.0	0.0	0.0	0.0	0.0	0.0	0.0	0.0	0.0	0.0	0.0	0.0	0.0	0.0	0.0	0.0	0.0	0.0	0.0	0.0	0.0	0.0	0.0	0.0	0.0	0.0	0.0	0.0	0.0	0.0	0.0
P8S4_171102_354_A01	0.0	0.02	0.11	0.06	0.03	0.01	0.0	0.0	0.02	0.0	0.01	0.01	0.02	0.11	0.0	0.01	0.0	0.01	0.0	0.0	0.0	0.0	0.0	0.0	0.01	0.07	0.0	0.0	0.05	0.0	0.01	0.01	0.02	0.05	0.01	0.02	0.01	0.01	0.0	0.0	0.0	0.01	0.03	0.0	0.05	0.0	0.02	0.0	0.01
PBS4_171030_506_A01	0.0	0.01	0.17	0.04	0.0	0.0	0.0	0.0	0.0	0.0	0.0	0.0	0.0	0.09	0.0	0.03	0.0	0.0	0.0	0.0	0.01	0.01	0.0	0.0	0.0	0.01	0.02	0.02	0.04	0.0	0.0	0.01	0.02	0.02	0.0	0.02	0.0	0.0	0.0	0.02	0.0	0.0	0.0	0.0	0.01	0.0	0.01	0.0	0.0
P2S4_180321_052_A01	0.16	0.03	0.25	0.0	0.0	0.0	0.13	0.01	0.0	0.0	0.17	0.0	0.0	0.0	0.04	0.0	0.0	0.0	0.0	0.0	0.0	0.0	0.0	0.0	0.0	0.0	0.0	0.01	0.0	0.0	0.04	0.0	0.01	0.0	0.04	0.02	0.0	0.0	0.0	0.0	0.02	0.0	0.03	0.01	0.0	0.01	0.0	0.01	0.0
PXS4_180723_901_A01	0.0	0.23	0.33	0.0	0.0	0.0	0.0	0.0	0.1	0.26	0.08	0.0	0.0	0.0	0.0	0.0	0.0	0.0	0.0	0.0	0.0	0.0	0.0	0.0	0.0	0.0	0.0	0.0	0.0	0.0	0.0	0.0	0.0	0.0	0.0	0.0	0.0	0.0	0.0	0.0	0.0	0.0	0.0	0.0	0.0	0.0	0.0	0.0	0.0
PES4_190812_656_A01	0.3	0.0	0.38	0.0	0.0	0.0	0.0	0.0	0.0	0.0	0.0	0.0	0.0	0.0	0.0	0.0	0.0	0.0	0.0	0.0	0.0	0.0	0.0	0.0	0.0	0.0	0.0	0.0	0.0	0.0	0.0	0.0	0.0	0.01	0.03	0.04	0.02	0.0	0.0	0.02	0.0	0.02	0.03	0.0	0.0	0.0	0.0	0.0	0.0
P1S4_180226_004_A01	0.1	0.0	0.54	0.02	0.0	0.0	0.0	0.0	0.0	0.0	0.0	0.0	0.0	0.34	0.0	0.0	0.0	0.0	0.0	0.0	0.0	0.0	0.0	0.0	0.0	0.0	0.0	0.0	0.0	0.0	0.0	0.0	0.0	0.0	0.0	0.0	0.0	0.0	0.0	0.0	0.0	0.0	0.0	0.0	0.0	0.0	0.0	0.0	0.0
PJS4_201027_803_A01	0.1	0.0	0.0	0.03	0.0	0.0	0.0	0.02	0.0	0.0	0.07	0.0	0.06	0.0	0.1	0.02	0.0	0.0	0.03	0.0	0.0	0.0	0.02	0.0	0.0	0.01	0.01	0.01	0.08	0.0	0.01	0.02	0.03	0.0	0.01	0.04	0.04	0.02	0.0	0.01	0.02	0.0	0.06	0.0	0.01	0.0	0.02	0.0	0.0
PBS4_180706_505_A01	0.11	0.0	0.0	0.0	0.0	0.01	0.0	0.04	0.0	0.0	0.01	0.0	0.03	0.03	0.0	0.0	0.0	0.0	0.01	0.0	0.0	0.0	0.01	0.0	0.0	0.0	0.01	0.0	0.0	0.0	0.0	0.0	0.01	0.0	0.0	0.0	0.0	0.0	0.0	0.02	0.0	0.0	0.01	0.0	0.0	0.0	0.0	0.0	0.0
P1S4_180815_001_A01	0.11	0.0	0.0	0.02	0.03	0.0	0.0	0.0	0.0	0.0	0.0	0.11	0.0	0.01	0.07	0.01	0.0	0.0	0.01	0.0	0.0	0.0	0.0	0.0	0.0	0.02	0.04	0.04	0.02	0.0	0.05	0.05	0.07	0.0	0.03	0.08	0.01	0.01	0.02	0.0	0.03	0.0	0.01	0.0	0.03	0.0	0.02	0.0	0.01
P2S4_171009_055_A01	0.11	0.0	0.01	0.0	0.01	0.0	0.0	0.01	0.0	0.0	0.09	0.0	0.0	0.0	0.0	0.0	0.0	0.0	0.02	0.03	0.0	0.03	0.01	0.02	0.0	0.0	0.07	0.07	0.01	0.0	0.04	0.01	0.03	0.01	0.01	0.01	0.02	0.01	0.01	0.01	0.01	0.0	0.01	0.0	0.03	0.0	0.0	0.0	0.02
P1S4_180622_001_A01	0.12	0.06	0.05	0.06	0.0	0.04	0.02	0.02	0.0	0.0	0.0	0.05	0.0	0.03	0.03	0.0	0.0	0.0	0.0	0.0	0.0	0.0	0.0	0.0	0.0	0.0	0.0	0.0	0.0	0.0	0.06	0.01	0.05	0.02	0.02	0.03	0.03	0.0	0.02	0.04	0.0	0.0	0.05	0.07	0.0	0.03	0.09	0.0	0.0
PBS4_180626_507_A01	0.13	0.0	0.0	0.1	0.05	0.0	0.03	0.01	0.0	0.0	0.0	0.04	0.03	0.0	0.0	0.0	0.0	0.0	0.0	0.0	0.01	0.0	0.0	0.0	0.0	0.0	0.0	0.0	0.0	0.05	0.01	0.01	0.01	0.03	0.0	0.0	0.0	0.01	0.01	0.0	0.03	0.0	0.01	0.0	0.0	0.01	0.0	0.0	0.0
PBS4_181115_502_A01	0.13	0.02	0.0	0.09	0.01	0.08	0.12	0.0	0.0	0.0	0.0	0.0	0.0	0.0	0.0	0.0	0.0	0.0	0.0	0.0	0.0	0.0	0.0	0.0	0.0	0.0	0.0	0.0	0.0	0.0	0.05	0.0	0.08	0.01	0.04	0.1	0.02	0.0	0.01	0.03	0.0	0.01	0.03	0.03	0.01	0.04	0.0	0.0	0.0
P8S4_171110_357_A01	0.13	0.0	0.0	0.0	0.0	0.0	0.0	0.01	0.0	0.0	0.11	0.0	0.1	0.0	0.1	0.0	0.0	0.0	0.0	0.0	0.0	0.0	0.0	0.0	0.0	0.0	0.0	0.0	0.0	0.0	0.07	0.0	0.08	0.01	0.03	0.05	0.05	0.0	0.0	0.03	0.05	0.0	0.08	0.03	0.01	0.01	0.0	0.0	0.03
P2S4_180724_051_A01	0.15	0.01	0.0	0.0	0.0	0.0	0.01	0.0	0.0	0.0	0.09	0.08	0.02	0.0	0.0	0.0	0.0	0.0	0.0	0.0	0.02	0.03	0.03	0.05	0.0	0.04	0.0	0.0	0.1	0.0	0.01	0.01	0.01	0.0	0.04	0.06	0.02	0.0	0.0	0.0	0.02	0.01	0.03	0.0	0.0	0.0	0.01	0.0	0.02
P8S4_180410_352_A01	0.16	0.0	0.0	0.0	0.0	0.05	0.02	0.02	0.0	0.0	0.08	0.0	0.03	0.01	0.01	0.0	0.0	0.0	0.03	0.0	0.01	0.0	0.0	0.0	0.0	0.0	0.0	0.0	0.0	0.02	0.02	0.02	0.02	0.03	0.01	0.02	0.02	0.0	0.0	0.0	0.01	0.0	0.02	0.01	0.05	0.0	0.0	0.01	0.02
P8S4_180103_351_A01	0.17	0.0	0.0	0.0	0.0	0.0	0.04	0.02	0.0	0.0	0.0	0.0	0.01	0.0	0.0	0.0	0.0	0.0	0.0	0.0	0.0	0.0	0.0	0.0	0.0	0.0	0.0	0.0	0.0	0.0	0.07	0.08	0.06	0.03	0.06	0.08	0.0	0.0	0.01	0.0	0.0	0.0	0.12	0.02	0.04	0.05	0.0	0.0	0.0
P9S4_171005_402_A01	0.18	0.0	0.0	0.0	0.0	0.0	0.0	0.01	0.0	0.0	0.02	0.12	0.0	0.0	0.0	0.0	0.01	0.0	0.01	0.0	0.0	0.0	0.0	0.0	0.0	0.0	0.0	0.05	0.0	0.0	0.03	0.0	0.0	0.01	0.03	0.04	0.03	0.0	0.02	0.06	0.0	0.02	0.01	0.0	0.0	0.01	0.02	0.0	0.02
P9S4_180316_401_A01	0.19	0.0	0.0	0.0	0.0	0.0	0.0	0.0	0.0	0.0	0.08	0.08	0.01	0.01	0.04	0.06	0.0	0.0	0.02	0.0	0.0	0.0	0.03	0.02	0.0	0.05	0.0	0.0	0.0	0.0	0.01	0.0	0.01	0.0	0.01	0.01	0.01	0.0	0.0	0.03	0.0	0.0	0.01	0.02	0.01	0.0	0.02	0.0	0.0
PAS4_180724_452_A01	0.21	0.01	0.0	0.0	0.0	0.0	0.0	0.15	0.0	0.0	0.05	0.15	0.01	0.19	0.19	0.0	0.0	0.0	0.0	0.0	0.0	0.0	0.0	0.0	0.0	0.0	0.0	0.0	0.04	0.0	0.0	0.0	0.0	0.0	0.0	0.0	0.0	0.0	0.0	0.0	0.0	0.0	0.0	0.0	0.0	0.0	0.0	0.0	0.0
PBS4_180717_505_A01	0.21	0.0	0.0	0.02	0.06	0.0	0.04	0.02	0.0	0.0	0.02	0.0	0.05	0.01	0.0	0.08	0.0	0.0	0.0	0.01	0.0	0.03	0.0	0.0	0.01	0.1	0.0	0.0	0.11	0.0	0.0	0.0	0.0	0.07	0.0	0.01	0.03	0.0	0.0	0.07	0.0	0.0	0.04	0.01	0.0	0.0	0.0	0.0	0.0
PES4_180814_651_A01	0.22	0.07	0.03	0.11	0.0	0.0	0.01	0.0	0.0	0.0	0.01	0.01	0.01	0.01	0.03	0.19	0.0	0.09	0.02	0.0	0.0	0.0	0.0	0.0	0.0	0.0	0.01	0.02	0.16	0.0	0.0	0.0	0.0	0.0	0.0	0.0	0.0	0.0	0.0	0.0	0.0	0.0	0.0	0.0	0.0	0.0	0.0	0.0	0.0
P9S4_180119_402_A01	0.22	0.0	0.0	0.01	0.13	0.0	0.0	0.0	0.0	0.0	0.0	0.02	0.0	0.0	0.02	0.02	0.0	0.0	0.0	0.0	0.0	0.0	0.0	0.0	0.0	0.0	0.0	0.0	0.02	0.01	0.02	0.0	0.02	0.0	0.0	0.01	0.0	0.0	0.0	0.0	0.03	0.0	0.01	0.0	0.01	0.02	0.01	0.0	0.01
PBS4_171027_505_A01	0.25	0.02	0.02	0.09	0.12	0.0	0.0	0.0	0.04	0.0	0.1	0.0	0.02	0.0	0.0	0.02	0.09	0.0	0.0	0.0	0.0	0.0	0.02	0.05	0.0	0.04	0.03	0.01	0.04	0.0	0.0	0.0	0.02	0.0	0.0	0.0	0.0	0.0	0.0	0.0	0.0	0.0	0.0	0.02	0.0	0.0	0.0	0.0	0.0
PAS4_190401_453_A01	0.28	0.15	0.11	0.2	0.23	0.0	0.0	0.0	0.0	0.0	0.0	0.0	0.0	0.0	0.0	0.01	0.0	0.0	0.0	0.0	0.0	0.01	0.0	0.0	0.0	0.01	0.0	0.0	0.0	0.0	0.0	0.0	0.0	0.0	0.0	0.0	0.0	0.0	0.0	0.0	0.0	0.0	0.0	0.0	0.0	0.0	0.0	0.0	0.0
PAS4_171115_452_A01	0.31	0.0	0.0	0.0	0.0	0.0	0.0	0.0	0.0	0.0	0.0	0.0	0.0	0.0	0.01	0.0	0.0	0.0	0.0	0.0	0.0	0.0	0.0	0.0	0.0	0.0	0.0	0.0	0.0	0.01	0.0	0.0	0.0	0.0	0.0	0.0	0.0	0.0	0.0	0.0	0.0	0.0	0.01	0.0	0.0	0.0	0.0	0.0	0.0
PBS4_180830_503_A01	0.31	0.0	0.03	0.15	0.16	0.0	0.0	0.0	0.0	0.0	0.0	0.09	0.14	0.0	0.0	0.0	0.0	0.0	0.0	0.0	0.0	0.0	0.0	0.0	0.0	0.0	0.0	0.0	0.0	0.03	0.0	0.0	0.0	0.0	0.0	0.0	0.0	0.0	0.0	0.0	0.0	0.0	0.0	0.0	0.0	0.0	0.0	0.0	0.0
P9S4_171024_405_A01	0.31	0.0	0.0	0.0	0.0	0.02	0.0	0.0	0.0	0.0	0.0	0.0	0.0	0.0	0.0	0.0	0.0	0.0	0.0	0.0	0.0	0.0	0.0	0.0	0.0	0.0	0.0	0.0	0.0	0.0	0.0	0.01	0.02	0.01	0.01	0.0	0.01	0.0	0.0	0.01	0.0	0.0	0.01	0.01	0.01	0.0	0.0	0.01	0.0
P8S4_180124_353_A01	0.31	0.0	0.0	0.0	0.0	0.0	0.0	0.0	0.0	0.0	0.0	0.16	0.04	0.0	0.0	0.0	0.0	0.0	0.0	0.0	0.0	0.0	0.0	0.0	0.0	0.0	0.0	0.0	0.0	0.0	0.04	0.0	0.0	0.02	0.02	0.0	0.0	0.0	0.0	0.0	0.01	0.0	0.02	0.04	0.0	0.0	0.01	0.0	0.0
PBS4_180418_505_A01	0.32	0.14	0.02	0.29	0.02	0.19	0.02	0.0	0.0	0.0	0.0	0.0	0.0	0.0	0.0	0.0	0.0	0.0	0.0	0.0	0.0	0.0	0.0	0.0	0.0	0.0	0.0	0.0	0.0	0.0	0.0	0.0	0.0	0.0	0.0	0.0	0.0	0.0	0.0	0.0	0.0	0.0	0.0	0.0	0.0	0.0	0.0	0.0	0.0
P8S4_171020_351_A01	0.32	0.0	0.11	0.06	0.0	0.06	0.03	0.02	0.0	0.0	0.1	0.0	0.1	0.0	0.03	0.01	0.0	0.0	0.0	0.0	0.0	0.0	0.0	0.0	0.02	0.01	0.0	0.0	0.0	0.0	0.0	0.01	0.03	0.01	0.0	0.0	0.0	0.0	0.0	0.0	0.0	0.0	0.0	0.0	0.0	0.0	0.02	0.0	0.0
PES4_190823_654_A01	0.33	0.0	0.12	0.06	0.0	0.0	0.0	0.0	0.0	0.0	0.0	0.0	0.0	0.0	0.0	0.0	0.0	0.0	0.0	0.0	0.0	0.0	0.0	0.0	0.0	0.0	0.0	0.0	0.0	0.0	0.0	0.0	0.0	0.0	0.0	0.0	0.0	0.0	0.0	0.0	0.0	0.0	0.0	0.0	0.0	0.0	0.0	0.0	0.0
PBS4_180418_504_A01	0.34	0.05	0.07	0.0	0.04	0.16	0.28	0.0	0.0	0.0	0.02	0.01	0.0	0.0	0.0	0.0	0.0	0.0	0.0	0.0	0.0	0.0	0.0	0.0	0.0	0.0	0.0	0.0	0.0	0.0	0.0	0.0	0.0	0.0	0.0	0.0	0.0	0.0	0.0	0.0	0.0	0.0	0.0	0.0	0.0	0.0	0.0	0.0	0.0
P8S4_171013_351_A01	0.34	0.01	0.0	0.0	0.01	0.0	0.0	0.0	0.0	0.0	0.0	0.18	0.01	0.0	0.0	0.0	0.0	0.0	0.0	0.0	0.0	0.0	0.0	0.0	0.0	0.0	0.0	0.0	0.0	0.0	0.0	0.0	0.0	0.0	0.05	0.0	0.01	0.0	0.0	0.0	0.02	0.0	0.04	0.01	0.0	0.0	0.0	0.02	0.0
P1S4_190807_001_A01	0.36	0.0	0.0	0.0	0.0	0.0	0.0	0.03	0.0	0.0	0.13	0.0	0.33	0.01	0.0	0.0	0.0	0.0	0.0	0.0	0.0	0.0	0.0	0.0	0.0	0.0	0.0	0.02	0.01	0.0	0.01	0.0	0.0	0.0	0.0	0.0	0.01	0.0	0.0	0.0	0.0	0.0	0.0	0.0	0.0	0.0	0.02	0.0	0.0
P8S4_191017_351_A01	0.4	0.0	0.0	0.0	0.0	0.0	0.0	0.0	0.06	0.04	0.14	0.0	0.06	0.0	0.0	0.0	0.0	0.0	0.0	0.0	0.0	0.0	0.0	0.0	0.0	0.0	0.0	0.0	0.0	0.06	0.0	0.02	0.02	0.0	0.01	0.02	0.0	0.0	0.0	0.01	0.01	0.0	0.0	0.0	0.0	0.0	0.0	0.0	0.0
PBS4_180727_503_A01	0.4	0.0	0.01	0.03	0.0	0.0	0.0	0.0	0.0	0.0	0.0	0.34	0.03	0.03	0.06	0.0	0.0	0.0	0.0	0.0	0.0	0.0	0.01	0.0	0.0	0.01	0.01	0.05	0.02	0.0	0.0	0.0	0.0	0.0	0.0	0.0	0.0	0.0	0.0	0.0	0.0	0.0	0.0	0.0	0.0	0.0	0.0	0.0	0.0
P2S4_171211_052_A01	0.42	0.0	0.0	0.0	0.0	0.0	0.03	0.0	0.0	0.0	0.01	0.05	0.0	0.01	0.04	0.17	0.0	0.0	0.0	0.0	0.01	0.01	0.04	0.05	0.0	0.16	0.0	0.0	0.0	0.0	0.0	0.0	0.0	0.0	0.0	0.0	0.0	0.0	0.0	0.0	0.0	0.0	0.0	0.0	0.0	0.0	0.0	0.0	0.0
PAS4_180321_452_A01	0.46	0.01	0.0	0.31	0.0	0.0	0.0	0.0	0.0	0.0	0.0	0.0	0.15	0.0	0.06	0.0	0.0	0.0	0.0	0.0	0.0	0.0	0.0	0.01	0.0	0.0	0.0	0.0	0.0	0.0	0.0	0.0	0.0	0.0	0.0	0.0	0.0	0.0	0.0	0.0	0.0	0.0	0.0	0.0	0.0	0.0	0.0	0.0	0.0
PAS4_180316_452_A01	0.47	0.0	0.0	0.0	0.0	0.0	0.0	0.0	0.03	0.13	0.37	0.0	0.0	0.0	0.0	0.0	0.0	0.0	0.0	0.0	0.0	0.0	0.0	0.0	0.0	0.0	0.0	0.0	0.0	0.0	0.0	0.0	0.0	0.0	0.0	0.0	0.0	0.0	0.0	0.0	0.0	0.0	0.0	0.0	0.0	0.0	0.0	0.0	0.0
P1S4_190628_004_A01	0.47	0.0	0.22	0.18	0.0	0.01	0.0	0.0	0.0	0.0	0.0	0.0	0.01	0.0	0.0	0.0	0.0	0.0	0.0	0.0	0.0	0.0	0.0	0.0	0.0	0.0	0.0	0.0	0.0	0.0	0.0	0.0	0.0	0.0	0.0	0.0	0.0	0.0	0.0	0.0	0.0	0.0	0.0	0.0	0.0	0.0	0.01	0.0	0.0
P2S4_171017_053_A01	0.48	0.03	0.0	0.0	0.16	0.0	0.0	0.02	0.0	0.0	0.01	0.0	0.0	0.0	0.01	0.01	0.0	0.0	0.0	0.0	0.0	0.0	0.0	0.0	0.0	0.0	0.0	0.0	0.01	0.0	0.02	0.0	0.02	0.01	0.03	0.03	0.0	0.0	0.0	0.0	0.02	0.0	0.05	0.0	0.01	0.0	0.0	0.03	0.0
PBS4_180604_504_A01	0.49	0.0	0.0	0.0	0.0	0.0	0.0	0.01	0.01	0.0	0.16	0.17	0.14	0.01	0.01	0.0	0.0	0.0	0.0	0.0	0.0	0.0	0.0	0.0	0.0	0.0	0.0	0.0	0.0	0.0	0.0	0.0	0.0	0.0	0.0	0.0	0.0	0.0	0.0	0.0	0.0	0.0	0.0	0.0	0.0	0.0	0.0	0.0	0.0
PBS4_180601_501_A01	0.52	0.0	0.0	0.0	0.0	0.0	0.0	0.0	0.0	0.0	0.0	0.0	0.0	0.05	0.21	0.05	0.0	0.0	0.02	0.0	0.0	0.0	0.02	0.0	0.0	0.0	0.0	0.0	0.06	0.0	0.0	0.0	0.0	0.0	0.0	0.0	0.0	0.0	0.0	0.0	0.0	0.0	0.0	0.0	0.0	0.0	0.0	0.0	0.0
P9S4_171025_404_A01	0.56	0.01	0.15	0.28	0.0	0.0	0.0	0.0	0.0	0.0	0.0	0.0	0.0	0.0	0.0	0.0	0.0	0.0	0.0	0.0	0.0	0.0	0.0	0.0	0.0	0.0	0.0	0.0	0.0	0.0	0.0	0.0	0.0	0.0	0.0	0.0	0.0	0.0	0.0	0.0	0.0	0.0	0.0	0.0	0.0	0.0	0.0	0.0	0.0
P1S4_180228_002_A01	0.7	0.0	0.03	0.23	0.04	0.0	0.0	0.0	0.0	0.0	0.0	0.0	0.0	0.0	0.0	0.0	0.0	0.0	0.0	0.0	0.0	0.0	0.0	0.0	0.0	0.0	0.0	0.0	0.0	0.0	0.0	0.0	0.0	0.0	0.0	0.0	0.0	0.0	0.0	0.0	0.0	0.0	0.0	0.0	0.0	0.0	0.0	0.0	0.0
P8S4_171030_351_A01	0.79	0.0	0.0	0.0	0.0	0.0	0.0	0.0	0.0	0.0	0.0	0.0	0.0	0.15	0.0	0.0	0.0	0.0	0.0	0.0	0.0	0.0	0.0	0.0	0.01	0.05	0.0	0.0	0.0	0.0	0.0	0.0	0.0	0.0	0.0	0.0	0.0	0.0	0.0	0.0	0.0	0.0	0.0	0.0	0.0	0.0	0.0	0.0	0.0
PAS4_171020_451_A01	0.8	0.0	0.0	0.0	0.0	0.0	0.0	0.05	0.0	0.0	0.05	0.0	0.0	0.01	0.01	0.0	0.0	0.0	0.0	0.0	0.0	0.04	0.0	0.0	0.0	0.01	0.0	0.0	0.0	0.0	0.0	0.01	0.0	0.01	0.0	0.0	0.0	0.0	0.0	0.0	0.0	0.0	0.0	0.0	0.0	0.0	0.0	0.0	0.0
[truncated: 13 more columns]
