# Supplementary material for: Scaled, high fidelity electrophysiological, morphological, and transcriptomic cell characterization
Source: eLife. 2021 Aug 13;10:e65482. doi: 10.7554/eLife.65482 (PMC8428855; doi:10.7554/eLife.65482)
Supplement: Figure 4—source data 1. [file elife-65482-fig4-data1.csv]

normalized_marker_sum_bin	Pvalb	Nxph1	Tac1	Nek7	Cox6a2	Gabrd	Sst	Vip	Slc17a7	Sv2b	Lingo1	BC048546
0.0	0.0	0.0	0.0	0.0	0.0	0.0	0.0	0.0	0.0	0.0	0.0	0.0
0.1	1.9599729327101667	0.0	0.0	4.187149788682054	1.8593477182173572	1.4546658084398374	0.0	0.0	1.049154152550105	0.8760799124787222	0.0	0.0
0.2	3.819009491443431	2.493780145314223	0.4621335500911748	5.446995630310775	1.5794906599980816	0.6389146795868962	0.6661570620493132	0.0	1.0587485339037879	0.5795635882123782	0.44618561697959336	0.10097369003042565
0.3	5.731857546202594	2.7955651213772477	0.6351434152745562	5.288133403449641	2.0786749444463326	1.9163504465581032	0.9107207592231675	0.09135981898839318	2.2661186081788873	1.0346143534714631	1.0594729097864042	1.0967952233872733
0.4	7.034476387386865	4.726434355805437	1.1461760961704546	5.750187612604459	3.061769487493798	3.5317620805587078	0.3548514234329889	0.07373112987847782	3.3116884868543757	1.1233276128993779	0.9843981470793406	0.05335721631391096
0.5000000000000001	8.1215589638998	5.533707555432631	1.950481543205635	6.987500304978182	3.3280885303861516	4.940099433054543	0.7007855826142319	0.0	2.512753631687305	0.8840490330837201	0.720471637966513	1.1984008623949474
0.6000000000000001	6.754410920647349	8.872459119884239	1.5224112530710308	6.679053358334267	3.8883812508224223	6.784952867420742	0.5269909973122892	0.0	2.5649088820201493	1.8075105157101368	0.7066808396999119	0.5603823548294778
0.7000000000000001	7.282276775316001	9.426465001698727	1.8125672170205547	7.425348888272647	4.155933162750294	6.2989562425578765	0.6388256770838152	0.13478249354539085	2.08921073224177	0.5335198487601939	0.9424886504630251	0.7263455476941717
0.8	7.189553398910829	9.786777978590893	1.8878950141782327	7.886450111184911	4.544568834100678	7.333373308285166	0.5049818251059129	0.09831109366840488	1.759588190181816	0.5102324506900212	1.1159333086420582	0.558932129375197
0.9	7.271741775803384	9.96598118818889	3.6068953559651273	8.168974751993153	4.902662407887935	7.437741416357308	0.5552342395198864	0.08000824236062581	1.5416487606331517	0.8437325508466031	1.3848029761854586	0.6428381818870167
1.0	7.058583306300251	10.167978561393069	4.70603426502889	8.120891575542512	4.702424566758645	7.308585510719102	0.8844242554541458	0.0810526694465262	1.3950896622693854	0.7040828665450051	1.5935806395223575	0.7745832147190211
1.1	6.397504953159517	9.724375078319735	5.709648247649457	7.759391724892146	4.464115705347296	7.251242557011619	1.4642719073032	0.0	1.9655521563300213	0.8813855352217931	2.191366666224285	0.6518421094024016
1.2	5.814765472809948	10.833215133315614	0.0	6.187350226170399	6.410041740969352	7.363290540701638	0.0	0.0	1.6832632847301592	4.307286618354702	0.0	2.932553851568417
