# Supplementary material for: Scaled, high fidelity electrophysiological, morphological, and transcriptomic cell characterization
Source: eLife. 2021 Aug 13;10:e65482. doi: 10.7554/eLife.65482 (PMC8428855; doi:10.7554/eLife.65482)
Supplement: Figure 4—source data 2. [file elife-65482-fig4-data2.csv]

normalized_marker_sum_bin	Slc17a7	Nrn1	Neurod6	Sv2b	Lingo1	BC048546	Gad1	Gad2	Rab3b	Slc6a1	Synpr	Zcchc12
0.1	1.6873084477967737	1.1546663556133696	0.0	0.0	0.0	0.3234241528806387	0.0	0.0	1.682001904172952	1.5321458847738523	0.26686463489191425	0.0
0.2	4.948721521451131	0.74715894808513	0.8495952656189016	0.5923598929303602	0.9211266391398384	0.8338332588653932	1.9878865881882164	0.6364199417860428	0.6165379835032108	1.4624952940157303	0.2825416525789718	0.13633084470904594
0.3	6.0614229282336485	1.6861111247838565	2.275501243140652	2.2402591754638363	2.8421742886015213	0.8972792959224425	0.8865140800852936	1.0508433088328522	0.8909834426245616	1.901309767784125	0.6805737072365075	0.33654362843161734
0.4	5.5816354046541665	3.373523729867951	2.257758889228201	2.6491130441840474	3.652649037979586	0.9748864642725139	0.5815420451369803	0.6645645677117066	1.9006847549838222	2.0713277883756605	0.8774020820487398	0.37582446084082605
0.5000000000000001	8.083785129478247	3.9166612588283725	1.1312084904985467	4.994575563730399	2.861651007064874	2.496084465234669	0.0	0.6821484421913996	3.3491856130597264	1.561975526041126	1.0708626812292708	2.5474853913618376
0.6000000000000001	7.810267838848535	2.7633446681871514	2.1419897076204446	6.68801040020301	4.669662313492162	1.579868197194655	0.5752007473884886	0.1492791121825827	2.2154705377771657	1.1666362170492401	2.3938140745162673	0.9820925483415816
0.7000000000000001	7.782719890437881	4.744577967827017	1.1788810593980799	7.604462649502104	5.848635673379613	0.8797780987512164	0.3369904777859305	0.34385940754035466	3.41064951656006	1.8623348657131302	1.6269768708028705	0.03776593500720839
0.8	7.93176812773844	4.680947782709219	1.4641569040929678	8.181540761945428	6.564428614249546	1.899548402814573	0.41926607762541684	0.37977440832052467	3.0292027625415816	1.2539586448192452	1.5644017241095283	0.6327436692787672
0.9	8.136566215116147	5.367607726881208	2.7952661844964832	8.614733012870218	6.939681548678268	2.1753148963007796	0.2138253556572632	0.2941299868106293	2.95264024362959	1.2889033982502796	1.7175703816082	0.20826465106252348
1.0	8.746446061177863	7.066351278278913	4.765236372162419	8.898385268240089	7.399891607187383	3.349450964782097	0.4548708529025218	0.19163890797611907	3.470269362482241	1.115520536946506	1.5507364653929936	0.20375679141734387
1.1	8.877570666459587	7.731727210687251	6.325211412922554	8.957944419056641	7.7224287822641315	2.8530496652922577	0.09711428479286072	0.2348670050526339	3.2652059186161124	0.4739616192451586	1.2213335232961398	0.15855937437827877
1.2	8.651432009396817	8.094451739864883	6.435768385470057	9.191974397614025	8.607945196926728	5.357184131328658	0.0	0.0	0.0	1.218162424916328	0.0	0.0
