# Supplementary material for: Scaled, high fidelity electrophysiological, morphological, and transcriptomic cell characterization
Source: eLife. 2021 Aug 13;10:e65482. doi: 10.7554/eLife.65482 (PMC8428855; doi:10.7554/eLife.65482)
Supplement: Figure 4—source data 3. [file elife-65482-fig4-data3.csv]

normalized_marker_sum_bin	Sst	Npy	Calb1	Crhbp	Lypd6	Cort	Pvalb	Vip	Slc17a7	Sv2b	Lingo1	BC048546
0.1	6.044780062465126	0.5372696299523558	0.8067096006243126	0.6619011305280471	1.4701484710990138	0.47581568107336203	0.0	0.0	2.2058434022851956	0.759429241171343	0.15490126957349085	0.151980251747649
0.2	6.578701247192426	3.247523773564761	0.7267132432204693	0.9137378654663287	1.2728303459129475	0.6125645803565956	1.240354127552985	0.0	2.1003666066442523	0.4409763907702806	0.49812302450257057	0.1306480864423325
0.3	7.541260115010905	5.00949168198176	2.6994205153335433	2.292870789408223	2.1047307736690786	2.2157394205379193	2.2261310914785626	0.18765071458119992	3.019982880063822	0.8921526920573777	0.9014920004651937	0.39772062317767837
0.4	8.924318062982152	7.688413074259677	3.5733365275732707	3.6601928383117803	1.2904301404844027	2.985296795738841	1.8327652470259401	0.11955749628073317	1.814998360725829	0.9782922994901849	1.2610596400507184	0.40935143348539094
0.5000000000000001	9.344696843697392	7.208261838112483	5.0452435540463405	2.778761913005108	2.183165857790199	3.719018633265532	1.012522273036338	0.05890960188412915	2.716824775741815	1.3002577768715697	1.585372007671903	0.47553951689413576
0.6000000000000001	9.251029322729222	6.993788810132173	5.008935081695671	4.432475933011846	3.8361887307576317	3.82444379828367	1.201236773508943	0.14791192547756812	1.9410828528619293	1.637005579268487	2.3510750657440034	1.13195494740772
0.7000000000000001	9.703716774880846	6.803465935264715	4.813611854421235	4.76068786562767	3.8589062173958917	3.221908651857717	1.9357649104636103	0.09381194488849078	1.9398289798747819	1.2003025161362668	2.3884179518982798	1.013475919066947
0.8	9.679616872050065	6.62735989431472	4.8234173073157365	4.638422548123828	4.516747586245122	2.89738344943078	0.9948402476892447	0.02519812928802617	1.84019346099933	1.109221322790812	2.5744771583707284	0.6830463429703082
0.9	9.747735913902435	7.682478635790918	5.657173673124296	5.888743978517796	4.379503461508302	4.129949738600543	1.249388123992181	0.07125464313786667	1.4803931362757337	0.9230451705580835	2.941411813907132	0.5764913559414618
1.0	10.247851162655248	9.437299749182655	7.027987856035489	7.410428277135314	5.149275834117444	5.636764758760778	1.9418874441022624	0.02495723242289404	1.2611334788922004	0.6214254193504962	3.1568093046354093	0.7465611739727451
1.1	10.54720736901183	10.546170271555265	7.752897356499842	7.967601259164723	6.195267460990541	7.330564551424278	1.7780252452900056	0.08053769444616181	1.344252202431575	0.58856056686057	3.0341460487970724	0.40551262066209154
1.2	11.517847185741807	11.427221266223007	8.795366668487347	8.90501100738224	8.185736286910565	7.917576127022736	2.225538893400247	0.0	1.5046772248196756	0.4535703629384796	4.787955926118572	0.7951909988689135
