# Supplementary material for: Scaled, high fidelity electrophysiological, morphological, and transcriptomic cell characterization
Source: eLife. 2021 Aug 13;10:e65482. doi: 10.7554/eLife.65482 (PMC8428855; doi:10.7554/eLife.65482)
Supplement: Figure 4—source data 4. [file elife-65482-fig4-data4.csv]

normalized_marker_sum_bin	Vip	Adarb2	Crh	Penk	Calb2	Cxcl14	Sst	Pvalb	Slc17a7	Sv2b	Lingo1	BC048546
0.0	0.0	0.0	0.0	0.0	0.0	0.0	0.0	0.0	0.0	0.0	0.0	0.0
0.1	1.031382375376471	0.0	0.0	0.0	4.683605049363784	7.407916139523817	2.45737485892585	0.0	0.0	0.0	0.0	0.0
0.2	4.580823464394811	1.8675651928657224	1.5626660058205775	3.113290376270002	4.061692171478815	4.640815711224896	0.0	0.6248116423780334	0.938275219860445	0.9884971115236488	1.5828157788379955	0.1399434957778763
0.3	7.914961821283182	2.6054127340222757	1.400167461905187	2.7097912016275827	5.533452644352585	3.055378380706872	0.7991909972894052	0.631709704773982	2.443229163464163	1.5037564597273363	0.6594472742987579	0.7591034357988509
0.4	10.203785990710779	6.382940197541186	3.822857316263114	5.785283786380433	3.9845892023468052	5.827864461796923	0.5310540548420625	1.1315152949692324	1.6206206140971406	0.8764790972717148	0.8279390636031656	0.6759605495789903
0.5000000000000001	10.42705281136551	6.656227527502152	2.6242503824979826	4.343077603448553	4.432629922731127	5.777687422318299	0.6137812892312139	0.7887252394780312	3.510463535299229	1.4662513143249158	1.4638877129493124	0.061389401697505876
0.6000000000000001	10.369932118420119	7.831965274699012	3.357491573230184	5.464776589800469	4.936330770574612	5.452654769786337	0.7441742405070185	1.1648503866433726	2.854679765562583	1.0520383191291158	1.9206139953695787	0.8660145288861506
0.7000000000000001	10.383791928434569	8.441213084865995	4.484186900084448	6.160701200905165	5.076998905821551	6.063459952361544	0.7119762527578763	0.8176650716973703	2.491291512898042	1.8567269735212426	3.2480110634872754	2.6709114508104053
0.8	11.215292338103671	9.985370964555427	4.727680142930545	6.898891900778577	6.8012675066830734	5.099759803061949	0.5404473436588404	1.2807448211548949	1.8672409194745845	1.5467384312580092	1.6647186840218848	0.29318248600767516
0.9	10.29687952100881	11.090608959026634	3.26311222940879	7.489407341069093	6.148978813516246	3.3652375261583543	0.40962916016961526	0.612538027187622	1.7238244699295098	1.2597219007760068	3.0093563457786914	1.1494446249142976
1.0	11.416622474091865	11.753933569299594	3.845271209116188	8.169983536516897	4.883490530196499	4.4042130106666715	0.5177747006920894	0.8617112253631335	2.182976424705983	1.0902655720824477	3.054512421745736	0.6490289688728459
1.1	11.883058437113894	12.24187803197831	6.870254659550853	7.3502321302272	5.056722511712392	5.662490008758193	0.2801808975738832	1.0448981543733644	1.823020083431984	0.7685863430525616	3.212408936894047	1.0734600048757652
1.2	12.114235675145514	12.86814451542082	7.405315831116192	7.511108070657808	5.371644388737727	6.292531402757807	0.36400300347504577	0.6142676580698997	1.6689137314577935	0.8601850478911981	2.15435781900804	0.39207145040799435
