# Supplementary material for: Scaled, high fidelity electrophysiological, morphological, and transcriptomic cell characterization
Source: eLife. 2021 Aug 13;10:e65482. doi: 10.7554/eLife.65482 (PMC8428855; doi:10.7554/eLife.65482)
Supplement: Figure 4—source data 5. [file elife-65482-fig4-data5.csv]

	Pvalb	Sst	Vip
0	0.333333333333333	0.5	0.25
0.1	0.538461538461538	0.633333333333333	0.619047619047619
0.2	0.583333333333333	0.791666666666667	0.84
0.3	0.7	0.826086956521739	0.782608695652174
0.4	0.85	0.738095238095238	0.625
0.5	0.928571428571429	0.9	0.875
0.6	1	0.787234042553192	0.821428571428571
0.7	1	0.937062937062937	0.944444444444444
0.8	0.971428571428571	0.930091185410334	0.890625
0.9	0.946564885496183	0.928947368421053	0.947916666666667
1	0.818181818181818	0.925925925925926	0.925233644859813
1.1	0.714285714285714	0.871794871794872	0.978260869565217
1.2	NA	1	0.924528301886792
1.3	NA	NA	0.642857142857143
1.4	NA	NA	0.2
