# Supplementary material for: Scaled, high fidelity electrophysiological, morphological, and transcriptomic cell characterization
Source: eLife. 2021 Aug 13;10:e65482. doi: 10.7554/eLife.65482 (PMC8428855; doi:10.7554/eLife.65482)
Supplement: Figure 4—source data 6. [file elife-65482-fig4-data6.csv]

maxmappingprobability	sample_id	dataset
0.92	PBS4_180307_502_A01	nms_fail
1	PAS4_200813_451_A01	nms_fail
0.78	P8S4_180502_353_A01	nms_fail
0.72	PAS4_181115_452_A01	nms_fail
0.42	PES4_180831_652_A01	nms_fail
0.85	PAS4_190618_453_A01	nms_fail
1	PBS4_180227_506_A01	nms_fail
0.51	P9S4_180123_403_A01	nms_fail
0.8	P2S4_180427_054_A01	nms_fail
0.85	PAS4_180612_452_A01	nms_fail
0.56	P8S4_180319_351_A01	nms_fail
0.52	PBS4_171013_504_A01	nms_fail
0.54	PBS4_181016_506_A01	nms_fail
0.39	P2S4_181017_052_A01	nms_fail
0.54	P8S4_180321_353_A01	nms_fail
0.79	P8S4_171024_354_A01	nms_fail
0.49	P8S4_171023_354_A01	nms_fail
0.59	P8S4_180418_353_A01	nms_fail
0.56	P9S4_171025_404_A01	nms_fail
0.71	P9S4_180108_406_A01	nms_fail
0.28	PAS4_190401_453_A01	nms_fail
0.47	P1S4_190628_004_A01	nms_fail
0.64	P1S4_180530_001_A01	nms_fail
0.53	P1S4_180725_002_A01	nms_fail
0.14	P2S4_180206_051_A01	nms_fail
0.24	P2S4_180220_051_A01	nms_fail
0.28	P2S4_180618_055_A01	nms_fail
0.71	P2S4_180710_057_A01	nms_fail
0.17	P8S4_180206_353_A01	nms_fail
0.17	P8S4_180327_351_A01	nms_fail
0.97	P9S4_171003_403_A01	nms_fail
0.72	P9S4_180228_404_A01	nms_fail
0.26	PAS4_180724_456_A01	nms_fail
0.38	PBS4_180302_503_A01	nms_fail
0.45	PBS4_180912_503_A01	nms_fail
0.16	P9S4_180316_402_A01	nms_fail
0.19	P1S4_180530_002_A01	nms_fail
0.23	P2S4_180716_051_A01	nms_fail
0.19	P8S4_180424_354_A01	nms_fail
0.24	P8S4_190328_356_A01	nms_fail
0.79	P8S4_171023_355_A01	nms_fail
1	P8S4_171025_357_A01	nms_fail
0.68	PAS4_190618_451_A01	nms_fail
0.49	P1S4_190225_002_A01	nms_fail
0.59	P1S4_180205_002_A01	nms_fail
0.18	P1S4_180910_002_A01	nms_fail
0.19	P8S4_180820_361_A01	nms_fail
0.21	PAS4_180604_453_A01	nms_fail
0.49	PAS4_180613_451_A01	nms_fail
0.18	PAS4_201102_452_A01	nms_fail
0.89	PES4_180914_651_A01	nms_fail
0.39	PES4_190212_652_A01	nms_fail
0.24	P9S4_180227_402_A01	nms_fail
0.14	P2S4_171017_052_A01	nms_fail
0.15	PAS4_181113_451_A01	nms_fail
0.14	P8S4_180122_352_A01	nms_fail
0.11	P1S4_180221_001_A01	nms_fail
0.56	PAS4_180416_452_A01	nms_fail
0.61	PAS4_190218_453_A01	nms_fail
0.27	PAS4_190703_454_A01	nms_fail
0.39	P8S4_180418_355_A01	nms_fail
0.34	PAS4_181130_452_A01	nms_fail
1	PBS4_180227_504_A01	nms_fail
0.46	PBS4_180411_504_A01	nms_fail
0.89	PES4_181022_652_A01	nms_fail
0.58	P8S4_180319_357_A01	nms_fail
0.28	PAS4_180601_453_A01	nms_fail
0.76	PBS4_171206_504_A01	nms_fail
0.58	P8S4_171122_353_A01	nms_fail
0.28	P8S4_171009_356_A01	nms_fail
0.26	PBS4_180906_501_A01	nms_fail
0.59	P8S4_180227_354_A01	nms_fail
0.38	P9S4_180410_403_A01	nms_fail
0.42	PAS4_190627_460_A01	nms_fail
0.18	P9S4_171115_407_A01	nms_fail
0.19	P1S4_180529_002_A01	nms_fail
0.22	P1S4_180823_005_A01	nms_fail
0.45	P1S4_180906_003_A01	nms_fail
0.32	P1S4_180910_001_A01	nms_fail
0.25	P1S4_190328_002_A01	nms_fail
0.33	P1S4_190411_001_A01	nms_fail
0.1	P2S4_180710_056_A01	nms_fail
0.15	P8S4_180202_353_A01	nms_fail
0.15	P8S4_180206_352_A01	nms_fail
0.33	PAS4_180202_453_A01	nms_fail
0.14	PAS4_180323_452_A01	nms_fail
0.43	PAS4_190409_454_A01	nms_fail
0.27	PBS4_171027_503_A01	nms_fail
0.25	PBS4_180406_505_A01	nms_fail
0.28	PBS4_180720_503_A01	nms_fail
0.36	PES4_181008_651_A01	nms_fail
0.14	P9S4_180411_403_A01	nms_fail
0.99	PBS4_180425_502_A01	nms_fail
0.09	PXS4_180720_904_A01	nms_fail
0.15	PBS4_180202_501_A01	nms_fail
0.18	P8S4_180316_352_A01	nms_fail
0.16	P1S4_180914_002_A01	nms_fail
0.15	P8S4_180504_356_A01	nms_fail
0.71	P1S4_190225_001_A01	nms_fail
0.29	PBS4_190114_502_A01	nms_fail
0.12	P1S4_180622_003_A01	nms_fail
0.32	PBS4_180316_502_A01	nms_fail
0.4	P1S4_180226_002_A01	nms_fail
0.7	P1S4_180228_002_A01	nms_fail
0.27	P1S4_180815_002_A01	nms_fail
0.37	P2S4_180321_051_A01	nms_fail
0.79	P8S4_171030_351_A01	nms_fail
0.74	P8S4_180226_353_A01	nms_fail
0.54	P8S4_180817_361_A01	nms_fail
0.48	P9S4_180207_403_A01	nms_fail
0.21	P9S4_180423_404_A01	nms_fail
0.23	PBS4_171117_501_A01	nms_fail
0.52	PBS4_180111_502_A01	nms_fail
0.23	PBS4_180504_501_A01	nms_fail
0.32	P2S4_180716_055_A01	nms_fail
0.26	P8S4_180827_359_A01	nms_fail
0.37	P8S4_171005_351_A01	nms_fail
0.39	P8S4_190226_352_A01	nms_fail
0.29	P9S4_171023_405_A01	nms_fail
0.24	PBS4_180514_503_A01	nms_fail
0.22	P8S4_171117_352_A01	nms_fail
0.26	P8S4_180402_356_A01	nms_fail
0.22	P2S4_180111_053_A01	nms_fail
0.56	P9S4_171116_402_A01	nms_fail
0.14	P8S4_180509_354_A01	nms_fail
0.27	P9S4_180727_404_A01	nms_fail
0.21	PBS4_180717_505_A01	nms_fail
0.2	P8S4_180410_353_A01	nms_fail
0.17	PBS4_171027_504_A01	nms_fail
0.3	PBS4_180409_504_A01	nms_fail
0.34	PBS4_171106_502_A01	nms_fail
0.19	P1S4_180416_003_A01	nms_fail
0.25	P1S4_180813_001_A01	nms_fail
0.57	P1S4_190329_003_A01	nms_fail
0.26	P2S4_190618_051_A01	nms_fail
0.15	P8S4_180828_360_A01	nms_fail
0.99	PAS4_180518_451_A01	nms_fail
0.55	P9S4_171016_401_A01	nms_fail
0.17	P9S4_180319_402_A01	nms_fail
0.15	P1S4_180622_002_A01	nms_fail
0.43	P1S4_180212_002_A01	nms_fail
0.38	P1S4_180221_004_A01	nms_fail
0.87	P1S4_180226_003_A01	nms_fail
0.29	P1S4_180314_002_A01	nms_fail
0.26	P1S4_180316_003_A01	nms_fail
0.78	P1S4_180327_004_A01	nms_fail
0.15	P1S4_180404_003_A01	nms_fail
0.34	P1S4_180411_004_A01	nms_fail
0.78	P1S4_180605_001_A01	nms_fail
0.18	P1S4_180706_002_A01	nms_fail
0.33	P1S4_180706_008_A01	nms_fail
0.92	P1S4_180806_001_A01	nms_fail
0.47	P1S4_180809_001_A01	nms_fail
0.4	P1S4_180821_006_A01	nms_fail
0.13	P1S4_180912_010_A01	nms_fail
1	P1S4_181127_002_A01	nms_fail
0.26	P1S4_190104_001_A01	nms_fail
0.41	P1S4_190118_002_A01	nms_fail
0.52	P1S4_190408_002_A01	nms_fail
0.5	P1S4_190524_001_A01	nms_fail
0.36	P1S4_190807_001_A01	nms_fail
0.17	P2S4_171003_056_A01	nms_fail
0.11	P2S4_171009_055_A01	nms_fail
0.12	P2S4_171019_051_A01	nms_fail
0.27	P2S4_171031_051_A01	nms_fail
0.27	P2S4_180221_052_A01	nms_fail
0.41	P2S4_180307_053_A01	nms_fail
0.19	P2S4_180613_053_A01	nms_fail
0.52	P8S4_171003_352_A01	nms_fail
0.2	P8S4_171103_354_A01	nms_fail
0.21	P8S4_171212_352_A01	nms_fail
0.29	P8S4_171215_355_A01	nms_fail
0.17	P8S4_180103_351_A01	nms_fail
0.36	P8S4_180123_352_A01	nms_fail
0.32	P8S4_180207_353_A01	nms_fail
0.26	P8S4_180226_352_A01	nms_fail
0.09	P8S4_180227_352_A01	nms_fail
0.45	P8S4_180409_356_A01	nms_fail
0.32	P8S4_180409_358_A01	nms_fail
0.16	P8S4_180410_352_A01	nms_fail
0.58	P8S4_180413_354_A01	nms_fail
0.2	P8S4_180905_353_A01	nms_fail
0.2	P8S4_181001_357_A01	nms_fail
0.13	P8S4_200807_352_A01	nms_fail
0.46	P9S4_171003_402_A01	nms_fail
0.21	P9S4_171020_401_A01	nms_fail
0.2	P9S4_171114_405_A01	nms_fail
0.28	P9S4_171206_402_A01	nms_fail
0.22	P9S4_180119_402_A01	nms_fail
0.31	P9S4_180122_401_A01	nms_fail
0.27	P9S4_180122_404_A01	nms_fail
0.98	P9S4_180201_401_A01	nms_fail
0.11	P9S4_180227_403_A01	nms_fail
0.22	P9S4_180409_407_A01	nms_fail
0.21	P9S4_180531_410_A01	nms_fail
0.13	P9S4_180622_402_A01	nms_fail
0.16	P9S4_180627_404_A01	nms_fail
0.5	P9S4_180710_413_A01	nms_fail
0.42	P9S4_180802_401_A01	nms_fail
0.66	PAS4_171005_451_A01	nms_fail
0.41	PAS4_180124_453_A01	nms_fail
0.93	PAS4_180130_451_A01	nms_fail
0.18	PAS4_180312_451_A01	nms_fail
0.62	PAS4_180320_452_A01	nms_fail
0.45	PAS4_180418_452_A01	nms_fail
0.57	PAS4_180501_455_A01	nms_fail
0.25	PAS4_180504_454_A01	nms_fail
0.21	PAS4_180507_452_A01	nms_fail
0.66	PAS4_180523_452_A01	nms_fail
0.26	PAS4_180604_451_A01	nms_fail
0.13	PAS4_180620_454_A01	nms_fail
0.31	PAS4_180711_454_A01	nms_fail
0.2	PAS4_180716_451_A01	nms_fail
1	PAS4_180720_452_A01	nms_fail
0.24	PAS4_180723_452_A01	nms_fail
0.21	PAS4_180724_452_A01	nms_fail
0.18	PAS4_180724_455_A01	nms_fail
0.56	PAS4_180829_454_A01	nms_fail
0.28	PAS4_180830_455_A01	nms_fail
1	PAS4_180906_455_A01	nms_fail
0.24	PAS4_181008_452_A01	nms_fail
0.37	PAS4_181012_455_A01	nms_fail
0.36	PAS4_181017_453_A01	nms_fail
0.79	PAS4_190121_451_A01	nms_fail
0.13	PAS4_190219_451_A01	nms_fail
0.5	PAS4_190702_456_A01	nms_fail
0.81	PAS4_201021_451_A01	nms_fail
0.34	PBS4_171004_502_A01	nms_fail
0.25	PBS4_171027_505_A01	nms_fail
0.12	PBS4_171107_505_A01	nms_fail
0.23	PBS4_171109_504_A01	nms_fail
0.16	PBS4_180117_501_A01	nms_fail
0.27	PBS4_180312_504_A01	nms_fail
0.16	PBS4_180315_501_A01	nms_fail
0.16	PBS4_180319_502_A01	nms_fail
0.14	PBS4_180319_503_A01	nms_fail
0.44	PBS4_180320_502_A01	nms_fail
0.45	PBS4_180403_505_A01	nms_fail
0.29	PBS4_180410_501_A01	nms_fail
0.17	PBS4_180411_505_A01	nms_fail
0.24	PBS4_180416_505_A01	nms_fail
0.25	PBS4_180418_503_A01	nms_fail
0.56	PBS4_180529_505_A01	nms_fail
0.28	PBS4_180529_508_A01	nms_fail
0.3	PBS4_180601_506_A01	nms_fail
0.49	PBS4_180604_504_A01	nms_fail
0.13	PBS4_180604_506_A01	nms_fail
0.37	PBS4_180605_502_A01	nms_fail
0.38	PBS4_180629_503_A01	nms_fail
0.17	PBS4_180629_507_A01	nms_fail
0.4	PBS4_180727_503_A01	nms_fail
0.16	PBS4_180827_505_A01	nms_fail
0.18	PBS4_180906_505_A01	nms_fail
0.38	PES4_190308_654_A01	nms_fail
0.3	PJS4_200921_802_A01	nms_fail
0.14	PXS4_180717_901_A01	nms_fail
0.31	PXS4_180723_900_A01	nms_fail
0.25	P2S4_180108_052_A01	nms_fail
0.25	P8S4_180207_355_A01	nms_fail
0.17	P8S4_180620_351_A01	nms_fail
0.24	P9S4_180124_401_A01	nms_fail
0.18	PAS4_180629_453_A01	nms_fail
0.16	P2S4_180131_051_A01	nms_fail
0.48	P8S4_171010_354_A01	nms_fail
0.11	P8S4_180314_355_A01	nms_fail
0.22	PAS4_190510_451_A01	nms_fail
0.48	P2S4_171017_053_A01	nms_fail
0.14	P9S4_171107_404_A01	nms_fail
0.26	P1S4_180730_001_A01	nms_fail
0.31	P8S4_180124_353_A01	nms_fail
0.61	P9S4_171116_403_A01	nms_fail
0.14	PBS4_180125_501_A01	nms_fail
0.13	P9S4_180219_401_A01	nms_fail
0.19	PAS4_180409_451_A01	nms_fail
0.83	P8S4_171009_355_A01	nms_fail
0.18	PBS4_180315_502_A01	nms_fail
0.12	P8S4_180305_354_A01	nms_fail
0.15	P9S4_180423_402_A01	nms_fail
0.15	P9S4_180727_406_A01	nms_fail
0.21	PAS4_180509_452_A01	nms_fail
0.17	PBS4_181005_503_A01	nms_fail
0.1	PBS4_180205_502_A01	nms_fail
0.3	PBS4_180213_503_A01	nms_fail
0.15	PBS4_181113_502_A01	nms_fail
0.13	P2S4_180307_051_A01	nms_fail
0.34	P8S4_171013_351_A01	nms_fail
0.19	P8S4_180706_355_A01	nms_fail
0.26	PBS4_180124_502_A01	nms_fail
0.36	PAS4_180521_452_A01	nms_fail
0.13	P2S4_180228_054_A01	nms_fail
0.18	P9S4_171005_402_A01	nms_fail
0.08	P9S4_180413_402_A01	nms_fail
0.21	P9S4_171211_402_A01	nms_fail
0.25	PBS4_171204_502_A01	nms_fail
0.15	P1S4_180129_001_A01	nms_fail
0.12	P1S4_180221_003_A01	nms_fail
0.54	P1S4_180226_004_A01	nms_fail
0.21	P1S4_180227_001_A01	nms_fail
0.23	P1S4_180305_003_A01	nms_fail
0.14	P1S4_180313_001_A01	nms_fail
0.11	P1S4_180313_002_A01	nms_fail
0.48	P1S4_180319_003_A01	nms_fail
0.51	P1S4_180410_003_A01	nms_fail
0.23	P1S4_180413_003_A01	nms_fail
0.77	P1S4_180531_002_A01	nms_fail
0.19	P1S4_180604_006_A01	nms_fail
0.18	P1S4_180611_001_A01	nms_fail
0.12	P1S4_180622_001_A01	nms_fail
0.35	P1S4_180725_003_A01	nms_fail
0.34	P1S4_180731_002_A01	nms_fail
0.32	P1S4_180813_002_A01	nms_fail
0.47	P1S4_180814_001_A01	nms_fail
0.11	P1S4_180815_001_A01	nms_fail
0.35	P1S4_180820_001_A01	nms_fail
0.7	P1S4_180906_002_A01	nms_fail
0.48	P1S4_180911_001_A01	nms_fail
0.17	P1S4_190104_005_A01	nms_fail
0.16	P1S4_190130_003_A01	nms_fail
0.2	P1S4_190214_001_A01	nms_fail
0.41	P1S4_190228_002_A01	nms_fail
0.53	P1S4_190301_002_A01	nms_fail
0.11	P1S4_190320_001_A01	nms_fail
0.18	P1S4_190326_002_A01	nms_fail
0.22	P1S4_190329_001_A01	nms_fail
0.24	P1S4_190614_002_A01	nms_fail
0.3	P1S4_190624_005_A01	nms_fail
0.15	P1S4_190701_008_A01	nms_fail
0.55	P2S4_171003_052_A01	nms_fail
0.17	P2S4_171018_054_A01	nms_fail
0.76	P2S4_171018_056_A01	nms_fail
0.38	P2S4_171113_054_A01	nms_fail
0.42	P2S4_171211_052_A01	nms_fail
0.43	P2S4_180126_055_A01	nms_fail
0.17	P2S4_180131_052_A01	nms_fail
0.22	P2S4_180205_056_A01	nms_fail
0.14	P2S4_180312_051_A01	nms_fail
0.19	P2S4_180315_052_A01	nms_fail
0.25	P2S4_180321_052_A01	nms_fail
0.8	P2S4_180411_052_A01	nms_fail
0.48	P2S4_180411_055_A01	nms_fail
0.29	P2S4_180514_053_A01	nms_fail
0.33	P2S4_180518_051_A01	nms_fail
0.09	P2S4_180618_056_A01	nms_fail
0.15	P2S4_180724_051_A01	nms_fail
0.13	P2S4_180730_052_A01	nms_fail
0.22	P2S4_180730_056_A01	nms_fail
0.11	P2S4_180731_053_A01	nms_fail
0.25	P2S4_180807_051_A01	nms_fail
0.34	P8S4_171006_357_A01	nms_fail
0.27	P8S4_171012_351_A01	nms_fail
0.34	P8S4_171012_352_A01	nms_fail
0.32	P8S4_171020_351_A01	nms_fail
0.11	P8S4_171102_354_A01	nms_fail
0.15	P8S4_171107_352_A01	nms_fail
0.13	P8S4_171110_357_A01	nms_fail
0.37	P8S4_171114_354_A01	nms_fail
0.23	P8S4_171114_355_A01	nms_fail
0.14	P8S4_171115_351_A01	nms_fail
0.23	P8S4_171115_352_A01	nms_fail
0.6	P8S4_171115_356_A01	nms_fail
0.3	P8S4_180108_352_A01	nms_fail
0.18	P8S4_180111_351_A01	nms_fail
0.44	P8S4_180122_353_A01	nms_fail
0.22	P8S4_180205_351_A01	nms_fail
0.22	P8S4_180221_355_A01	nms_fail
0.72	P8S4_180321_352_A01	nms_fail
0.25	P8S4_180321_355_A01	nms_fail
0.23	P8S4_180330_352_A01	nms_fail
0.27	P8S4_180402_351_A01	nms_fail
0.18	P8S4_180402_352_A01	nms_fail
0.34	P8S4_180402_355_A01	nms_fail
0.62	P8S4_180403_351_A01	nms_fail
0.57	P8S4_180404_357_A01	nms_fail
0.16	P8S4_180406_351_A01	nms_fail
0.12	P8S4_180406_352_A01	nms_fail
0.11	P8S4_180406_353_A01	nms_fail
0.45	P8S4_180411_358_A01	nms_fail
0.8	P8S4_180427_357_A01	nms_fail
0.13	P8S4_180502_352_A01	nms_fail
0.24	P8S4_180627_355_A01	nms_fail
0.14	P8S4_180830_354_A01	nms_fail
0.5	P8S4_180914_356_A01	nms_fail
0.32	P8S4_190702_355_A01	nms_fail
0.15	P8S4_191126_351_A01	nms_fail
0.15	P8S4_201008_355_A01	nms_fail
0.19	P9S4_171002_403_A01	nms_fail
0.23	P9S4_171003_409_A01	nms_fail
0.16	P9S4_171003_410_A01	nms_fail
0.33	P9S4_171004_408_A01	nms_fail
0.21	P9S4_171024_401_A01	nms_fail
0.31	P9S4_171024_405_A01	nms_fail
0.3	P9S4_171026_401_A01	nms_fail
0.15	P9S4_171027_401_A01	nms_fail
0.13	P9S4_171206_401_A01	nms_fail
0.17	P9S4_171208_402_A01	nms_fail
0.18	P9S4_171211_407_A01	nms_fail
0.16	P9S4_180109_402_A01	nms_fail
0.31	P9S4_180110_401_A01	nms_fail
0.16	P9S4_180125_401_A01	nms_fail
0.13	P9S4_180307_403_A01	nms_fail
0.21	P9S4_180313_405_A01	nms_fail
0.39	P9S4_180316_403_A01	nms_fail
0.22	P9S4_180403_406_A01	nms_fail
0.2	P9S4_180406_404_A01	nms_fail
0.21	P9S4_180416_406_A01	nms_fail
0.21	P9S4_180424_402_A01	nms_fail
0.67	P9S4_180806_402_A01	nms_fail
0.2	PAS4_171110_451_A01	nms_fail
0.29	PAS4_171208_451_A01	nms_fail
0.81	PAS4_180110_454_A01	nms_fail
0.13	PAS4_180112_456_A01	nms_fail
0.08	PAS4_180122_451_A01	nms_fail
0.21	PAS4_180125_452_A01	nms_fail
0.16	PAS4_180202_451_A01	nms_fail
0.09	PAS4_180205_453_A01	nms_fail
0.28	PAS4_180227_451_A01	nms_fail
0.45	PAS4_180306_451_A01	nms_fail
0.21	PAS4_180319_451_A01	nms_fail
0.24	PAS4_180327_453_A01	nms_fail
0.53	PAS4_180419_451_A01	nms_fail
0.34	PAS4_180425_454_A01	nms_fail
0.98	PAS4_180518_452_A01	nms_fail
0.66	PAS4_180529_455_A01	nms_fail
0.17	PAS4_180606_452_A01	nms_fail
0.19	PAS4_180615_456_A01	nms_fail
0.18	PAS4_180618_451_A01	nms_fail
0.27	PAS4_180626_452_A01	nms_fail
0.14	PAS4_180706_455_A01	nms_fail
0.09	PAS4_180716_452_A01	nms_fail
0.98	PAS4_180718_453_A01	nms_fail
0.11	PAS4_180718_454_A01	nms_fail
0.23	PAS4_180720_453_A01	nms_fail
0.18	PAS4_180723_451_A01	nms_fail
0.21	PAS4_180731_453_A01	nms_fail
0.73	PAS4_180828_454_A01	nms_fail
0.31	PAS4_180910_451_A01	nms_fail
0.29	PAS4_180911_454_A01	nms_fail
0.55	PAS4_180925_453_A01	nms_fail
0.46	PAS4_181012_454_A01	nms_fail
0.25	PAS4_181218_451_A01	nms_fail
0.57	PAS4_190219_455_A01	nms_fail
0.27	PAS4_190522_455_A01	nms_fail
0.31	PBS4_171011_501_A01	nms_fail
0.15	PBS4_171026_501_A01	nms_fail
0.15	PBS4_171115_502_A01	nms_fail
0.32	PBS4_171115_506_A01	nms_fail
0.73	PBS4_171116_504_A01	nms_fail
0.2	PBS4_171201_503_A01	nms_fail
0.32	PBS4_171201_507_A01	nms_fail
0.26	PBS4_180117_502_A01	nms_fail
0.37	PBS4_180205_504_A01	nms_fail
0.32	PBS4_180212_501_A01	nms_fail
0.37	PBS4_180213_502_A01	nms_fail
0.34	PBS4_180227_502_A01	nms_fail
0.33	PBS4_180319_505_A01	nms_fail
0.2	PBS4_180320_501_A01	nms_fail
0.17	PBS4_180403_503_A01	nms_fail
0.22	PBS4_180403_504_A01	nms_fail
0.12	PBS4_180403_507_A01	nms_fail
0.2	PBS4_180406_506_A01	nms_fail
0.81	PBS4_180409_501_A01	nms_fail
0.34	PBS4_180418_504_A01	nms_fail
0.32	PBS4_180418_505_A01	nms_fail
0.21	PBS4_180501_502_A01	nms_fail
0.31	PBS4_180502_504_A01	nms_fail
0.14	PBS4_180524_507_A01	nms_fail
0.52	PBS4_180601_501_A01	nms_fail
0.15	PBS4_180604_502_A01	nms_fail
0.22	PBS4_180604_503_A01	nms_fail
0.18	PBS4_180620_501_A01	nms_fail
0.16	PBS4_180703_505_A01	nms_fail
0.11	PBS4_180706_505_A01	nms_fail
0.27	PBS4_180816_502_A01	nms_fail
0.34	PBS4_180817_505_A01	nms_fail
0.31	PBS4_180830_503_A01	nms_fail
0.45	PBS4_180928_502_A01	nms_fail
0.2	PBS4_181002_505_A01	nms_fail
0.24	PBS4_181002_516_A01	nms_fail
0.16	PBS4_181016_501_A01	nms_fail
0.13	PBS4_181115_502_A01	nms_fail
0.28	PES4_180817_652_A01	nms_fail
0.33	PES4_190823_654_A01	nms_fail
0.18	PXS4_180717_903_A01	nms_fail
0.33	PXS4_180723_901_A01	nms_fail
0.21	P1S4_180417_003_A01	nms_fail
0.23	PAS4_190401_452_A01	nms_fail
0.25	P2S4_171129_051_A01	nms_fail
0.33	P1S4_180205_004_A01	nms_fail
0.42	P1S4_180213_001_A01	nms_fail
0.17	P1S4_180302_002_A01	nms_fail
0.26	P1S4_180306_001_A01	nms_fail
0.77	P1S4_180307_002_A01	nms_fail
0.36	P1S4_180309_001_A01	nms_fail
0.2	P1S4_180320_003_A01	nms_fail
0.48	P1S4_180323_002_A01	nms_fail
0.36	P1S4_180403_001_A01	nms_fail
0.74	P1S4_180409_002_A01	nms_fail
0.13	P1S4_180411_003_A01	nms_fail
0.51	P1S4_180716_005_A01	nms_fail
0.43	P1S4_181210_002_A01	nms_fail
0.22	P1S4_190614_001_A01	nms_fail
0.21	P1S4_190617_002_A01	nms_fail
0.37	P1S4_190930_001_A01	nms_fail
0.52	P1S4_191004_002_A01	nms_fail
0.31	P2S4_171018_051_A01	nms_fail
0.31	P2S4_171018_052_A01	nms_fail
0.41	P2S4_171019_052_A01	nms_fail
0.34	P2S4_171023_055_A01	nms_fail
0.48	P2S4_171222_051_A01	nms_fail
0.12	P2S4_180108_055_A01	nms_fail
0.34	P2S4_180108_056_A01	nms_fail
0.42	P2S4_180205_053_A01	nms_fail
0.17	P2S4_180305_054_A01	nms_fail
0.95	P2S4_180306_053_A01	nms_fail
0.12	P2S4_180312_052_A01	nms_fail
0.77	P2S4_180314_051_A01	nms_fail
0.56	P2S4_180327_051_A01	nms_fail
0.31	P2S4_180413_056_A01	nms_fail
0.33	P2S4_180423_052_A01	nms_fail
0.46	P2S4_180619_053_A01	nms_fail
0.14	P2S4_180706_053_A01	nms_fail
0.12	P2S4_180730_054_A01	nms_fail
0.47	P2S4_180731_054_A01	nms_fail
0.15	P2S4_180914_052_A01	nms_fail
0.3	P8S4_171004_356_A01	nms_fail
0.12	P8S4_171006_352_A01	nms_fail
0.26	P8S4_171006_356_A01	nms_fail
0.18	P8S4_171010_356_A01	nms_fail
0.63	P8S4_171024_357_A01	nms_fail
0.18	P8S4_171108_354_A01	nms_fail
0.34	P8S4_171110_351_A01	nms_fail
0.65	P8S4_171115_354_A01	nms_fail
0.39	P8S4_171117_351_A01	nms_fail
0.59	P8S4_171211_352_A01	nms_fail
0.57	P8S4_171211_354_A01	nms_fail
0.3	P8S4_180102_352_A01	nms_fail
0.36	P8S4_180110_353_A01	nms_fail
0.25	P8S4_180118_352_A01	nms_fail
0.17	P8S4_180205_352_A01	nms_fail
0.47	P8S4_180228_355_A01	nms_fail
0.15	P8S4_180302_356_A01	nms_fail
0.48	P8S4_180305_357_A01	nms_fail
0.18	P8S4_180306_352_A01	nms_fail
0.21	P8S4_180307_351_A01	nms_fail
0.31	P8S4_180307_354_A01	nms_fail
0.77	P8S4_180307_357_A01	nms_fail
0.3	P8S4_180409_355_A01	nms_fail
0.34	P8S4_180626_354_A01	nms_fail
0.11	P8S4_190919_352_A01	nms_fail
0.4	P8S4_191017_351_A01	nms_fail
0.16	P8S4_191101_352_A01	nms_fail
0.19	P8S4_191121_351_A01	nms_fail
0.11	P8S4_191126_352_A01	nms_fail
0.2	P8S4_191220_351_A01	nms_fail
0.26	P8S4_200709_356_A01	nms_fail
0.13	P9S4_171002_404_A01	nms_fail
0.26	P9S4_171016_406_A01	nms_fail
0.29	P9S4_171020_403_A01	nms_fail
0.65	P9S4_171026_403_A01	nms_fail
0.53	P9S4_171108_405_A01	nms_fail
0.24	P9S4_171113_401_A01	nms_fail
0.55	P9S4_171204_403_A01	nms_fail
0.45	P9S4_171212_403_A01	nms_fail
0.4	P9S4_180122_403_A01	nms_fail
0.25	P9S4_180207_405_A01	nms_fail
0.17	P9S4_180207_407_A01	nms_fail
0.2	P9S4_180228_402_A01	nms_fail
0.16	P9S4_180302_404_A01	nms_fail
0.19	P9S4_180307_402_A01	nms_fail
0.19	P9S4_180316_401_A01	nms_fail
0.13	P9S4_180423_406_A01	nms_fail
0.33	P9S4_180619_403_A01	nms_fail
0.17	P9S4_180619_404_A01	nms_fail
0.7	P9S4_180807_413_A01	nms_fail
0.15	PAS4_171016_451_A01	nms_fail
0.8	PAS4_171020_451_A01	nms_fail
0.16	PAS4_171024_452_A01	nms_fail
0.31	PAS4_171027_451_A01	nms_fail
0.31	PAS4_171115_452_A01	nms_fail
0.15	PAS4_171206_452_A01	nms_fail
0.21	PAS4_171222_451_A01	nms_fail
0.17	PAS4_180110_453_A01	nms_fail
0.15	PAS4_180112_452_A01	nms_fail
0.12	PAS4_180118_453_A01	nms_fail
0.24	PAS4_180131_451_A01	nms_fail
0.15	PAS4_180206_454_A01	nms_fail
1	PAS4_180228_452_A01	nms_fail
0.55	PAS4_180228_454_A01	nms_fail
0.47	PAS4_180307_451_A01	nms_fail
0.34	PAS4_180307_452_A01	nms_fail
0.36	PAS4_180315_453_A01	nms_fail
0.47	PAS4_180316_452_A01	nms_fail
0.46	PAS4_180321_452_A01	nms_fail
0.53	PAS4_180406_452_A01	nms_fail
0.79	PAS4_180425_453_A01	nms_fail
0.16	PAS4_180504_451_A01	nms_fail
0.12	PAS4_180514_451_A01	nms_fail
0.2	PAS4_180619_454_A01	nms_fail
0.3	PAS4_180622_455_A01	nms_fail
0.29	PAS4_180703_455_A01	nms_fail
0.12	PAS4_180706_452_A01	nms_fail
0.14	PAS4_180730_454_A01	nms_fail
0.21	PAS4_180822_455_A01	nms_fail
0.2	PAS4_180822_456_A01	nms_fail
0.75	PAS4_181003_453_A01	nms_fail
0.5	PAS4_181011_451_A01	nms_fail
0.49	PAS4_181015_451_A01	nms_fail
0.2	PAS4_181217_454_A01	nms_fail
0.82	PAS4_190111_452_A01	nms_fail
0.16	PAS4_190627_454_A01	nms_fail
0.17	PAS4_190926_452_A01	nms_fail
0.36	PAS4_200707_455_A01	nms_fail
0.08	PBS4_171003_504_A01	nms_fail
0.37	PBS4_171026_503_A01	nms_fail
0.13	PBS4_171030_504_A01	nms_fail
0.17	PBS4_171030_506_A01	nms_fail
0.44	PBS4_171103_501_A01	nms_fail
0.23	PBS4_180226_503_A01	nms_fail
0.29	PBS4_180416_509_A01	nms_fail
0.97	PBS4_180418_506_A01	nms_fail
0.14	PBS4_180523_507_A01	nms_fail
0.13	PBS4_180626_507_A01	nms_fail
0.23	PBS4_180706_507_A01	nms_fail
0.29	PBS4_180716_504_A01	nms_fail
1	PBS4_180720_501_A01	nms_fail
0.15	PBS4_180731_504_A01	nms_fail
0.34	PBS4_180827_503_A01	nms_fail
0.35	PBS4_181009_504_A01	nms_fail
0.1	PBS4_181113_501_A01	nms_fail
0.22	PES4_180814_651_A01	nms_fail
0.31	PES4_180820_651_A01	nms_fail
0.12	PES4_180822_652_A01	nms_fail
0.34	PES4_181017_659_A01	nms_fail
0.52	PES4_190221_651_A01	nms_fail
0.38	PES4_190812_656_A01	nms_fail
0.29	PES4_190830_654_A01	nms_fail
0.31	PFS4_180817_701_A01	nms_fail
0.2	PFS4_181003_703_A01	nms_fail
0.44	PFS4_190305_702_A01	nms_fail
0.13	PJS4_200709_801_A01	nms_fail
0.31	PJS4_200729_801_A01	nms_fail
0.18	PJS4_200911_801_A01	nms_fail
0.47	PJS4_200921_801_A01	nms_fail
0.39	PJS4_200924_801_A01	nms_fail
0.1	PJS4_201027_803_A01	nms_fail
0.17	PXS4_180724_903_A01	nms_fail
1	P1S4_190422_003_A01	nms_pass
1	P8S4_190829_355_A01	nms_pass
1	PBS4_180615_503_A01	nms_pass
1	PFS4_191119_701_A01	nms_pass
0.98	PES4_190802_654_A01	nms_pass
0.96	P1S4_191209_001_A01	nms_pass
0.9	P8S4_181016_351_A01	nms_pass
1	P1S4_190617_001_A01	nms_pass
1	P2S4_180813_052_A01	nms_pass
1	P9S4_171024_408_A01	nms_pass
1	P9S4_180725_404_A01	nms_pass
1	PAS4_180123_452_A01	nms_pass
1	PBS4_171211_505_A01	nms_pass
1	PES4_180911_653_A01	nms_pass
0.99	PAS4_190513_452_A01	nms_pass
0.94	PES4_190617_652_A01	nms_pass
0.87	PBS4_181019_503_A01	nms_pass
1	P8S4_190215_355_A01	nms_pass
1	P8S4_190401_355_A01	nms_pass
1	P9S4_180727_403_A01	nms_pass
1	P9S4_180806_404_A01	nms_pass
1	P9S4_180807_411_A01	nms_pass
1	PAS4_180123_451_A01	nms_pass
1	PAS4_180227_454_A01	nms_pass
1	PAS4_180711_451_A01	nms_pass
1	PBS4_180123_501_A01	nms_pass
1	PBS4_180227_503_A01	nms_pass
1	PBS4_180228_505_A01	nms_pass
1	PBS4_180312_503_A01	nms_pass
1	PBS4_180524_503_A01	nms_pass
1	PBS4_180619_511_A01	nms_pass
1	PBS4_181016_502_A01	nms_pass
1	PES4_180911_654_A01	nms_pass
1	PES4_190215_653_A01	nms_pass
1	PES4_190510_653_A01	nms_pass
1	PFS4_190215_705_A01	nms_pass
0.99	P2S4_170922_055_A01	nms_pass
0.99	P8S4_190618_351_A01	nms_pass
0.99	P9S4_180117_402_A01	nms_pass
0.99	PAS4_190215_451_A01	nms_pass
0.97	P2S4_171128_053_A01	nms_pass
0.94	PBS4_171115_504_A01	nms_pass
0.93	P1S4_190620_002_A01	nms_pass
0.88	P8S4_171128_357_A01	nms_pass
0.84	PFS4_190513_701_A01	nms_pass
0.83	PES4_190617_651_A01	nms_pass
0.8	P1S4_190617_004_A01	nms_pass
0.8	P8S4_190620_352_A01	nms_pass
0.8	PFS4_190225_702_A01	nms_pass
0.79	P1S4_190618_002_A01	nms_pass
0.75	P9S4_171211_404_A01	nms_pass
0.75	P9S4_180626_405_A01	nms_pass
0.75	PBS4_180328_502_A01	nms_pass
0.74	P8S4_190513_353_A01	nms_pass
0.74	P9S4_180424_404_A01	nms_pass
0.74	PBS4_171116_505_A01	nms_pass
0.74	PFS4_190304_703_A01	nms_pass
0.72	P2S4_180307_052_A01	nms_pass
1	P1S4_180228_001_A01	nms_pass
1	P1S4_180319_004_A01	nms_pass
1	P1S4_180319_005_A01	nms_pass
1	P1S4_180910_003_A01	nms_pass
1	P1S4_180910_005_A01	nms_pass
1	P2S4_171211_053_A01	nms_pass
1	P2S4_180619_054_A01	nms_pass
1	P8S4_180227_355_A01	nms_pass
1	P8S4_180307_353_A01	nms_pass
1	P8S4_180418_356_A01	nms_pass
1	P8S4_180606_355_A01	nms_pass
1	P8S4_180906_353_A01	nms_pass
1	P8S4_181017_356_A01	nms_pass
1	P8S4_190219_353_A01	nms_pass
1	P8S4_190401_354_A01	nms_pass
1	P9S4_171211_403_A01	nms_pass
1	P9S4_180123_404_A01	nms_pass
1	P9S4_180124_405_A01	nms_pass
1	P9S4_180307_401_A01	nms_pass
1	P9S4_180319_406_A01	nms_pass
1	P9S4_180320_402_A01	nms_pass
1	P9S4_180427_403_A01	nms_pass
1	P9S4_180521_402_A01	nms_pass
1	P9S4_180611_402_A01	nms_pass
1	P9S4_180611_404_A01	nms_pass
1	P9S4_180706_404_A01	nms_pass
1	P9S4_180724_411_A01	nms_pass
1	P9S4_180725_402_A01	nms_pass
1	P9S4_180725_407_A01	nms_pass
1	PAS4_171024_451_A01	nms_pass
1	PAS4_171026_451_A01	nms_pass
1	PAS4_180227_453_A01	nms_pass
1	PAS4_180418_453_A01	nms_pass
1	PAS4_190221_451_A01	nms_pass
1	PAS4_190221_453_A01	nms_pass
1	PAS4_190401_454_A01	nms_pass
1	PBS4_171024_505_A01	nms_pass
1	PBS4_171027_502_A01	nms_pass
1	PBS4_171215_505_A01	nms_pass
1	PBS4_180226_502_A01	nms_pass
1	PBS4_181129_503_A01	nms_pass
1	PES4_180824_652_A01	nms_pass
1	PES4_190620_652_A01	nms_pass
1	PFS4_190219_704_A01	nms_pass
1	PFS4_190222_703_A01	nms_pass
1	PFS4_190403_703_A01	nms_pass
1	PFS4_190513_704_A01	nms_pass
0.99	P1S4_190212_002_A01	nms_pass
0.99	P8S4_171120_351_A01	nms_pass
0.99	PAS4_180226_452_A01	nms_pass
0.99	PAS4_180619_455_A01	nms_pass
0.99	PBS4_180514_509_A01	nms_pass
0.99	PBS4_181129_501_A01	nms_pass
0.99	PES4_190219_655_A01	nms_pass
0.99	PFS4_190513_703_A01	nms_pass
0.98	P1S4_190221_002_A01	nms_pass
0.98	P2S4_181017_053_A01	nms_pass
0.98	P9S4_180725_403_A01	nms_pass
0.98	P9S4_180807_412_A01	nms_pass
0.98	PES4_190510_652_A01	nms_pass
0.97	P8S4_190219_354_A01	nms_pass
0.97	P8S4_190617_351_A01	nms_pass
0.97	P8S4_190618_352_A01	nms_pass
0.97	P9S4_171208_408_A01	nms_pass
0.97	P9S4_180123_401_A01	nms_pass
0.97	PBS4_180824_507_A01	nms_pass
0.97	PES4_181129_651_A01	nms_pass
0.97	PES4_190219_656_A01	nms_pass
0.96	P1S4_190222_001_A01	nms_pass
0.96	P1S4_190222_002_A01	nms_pass
0.95	P1S4_180316_002_A01	nms_pass
0.95	P1S4_190620_001_A01	nms_pass
0.94	P8S4_180227_356_A01	nms_pass
0.94	PAS4_180911_453_A01	nms_pass
0.93	P2S4_180227_052_A01	nms_pass
0.92	P8S4_181017_355_A01	nms_pass
0.91	P9S4_180612_401_A01	nms_pass
0.9	P9S4_180807_415_A01	nms_pass
0.9	PES4_181016_652_A01	nms_pass
0.89	PBS4_171010_504_A01	nms_pass
0.88	P2S4_180126_053_A01	nms_pass
0.88	P2S4_180130_052_A01	nms_pass
0.87	P2S4_180228_053_A01	nms_pass
0.82	PFS4_190225_704_A01	nms_pass
0.8	PBS4_180824_506_A01	nms_pass
0.78	P8S4_190307_353_A01	nms_pass
0.75	P9S4_171128_401_A01	nms_pass
0.75	PAS4_181017_454_A01	nms_pass
0.75	PES4_181217_653_A01	nms_pass
0.75	PFS4_181017_703_A01	nms_pass
0.74	PAS4_190620_455_A01	nms_pass
0.73	P9S4_180130_401_A01	nms_pass
0.73	PFS4_181017_702_A01	nms_pass
0.72	P8S4_180820_360_A01	nms_pass
0.71	P8S4_190513_351_A01	nms_pass
0.71	PFS4_181129_701_A01	nms_pass
1	P1S4_180327_005_A01	nms_pass
1	P1S4_180406_002_A01	nms_pass
1	P1S4_180411_005_A01	nms_pass
1	P1S4_180411_006_A01	nms_pass
1	P1S4_180808_003_A01	nms_pass
1	P1S4_190124_005_A01	nms_pass
1	P1S4_190124_006_A01	nms_pass
1	P1S4_190620_003_A01	nms_pass
1	P1S4_190830_003_A01	nms_pass
1	P1S4_191212_001_A01	nms_pass
1	P2S4_170921_052_A01	nms_pass
1	P2S4_170922_054_A01	nms_pass
1	P2S4_171005_053_A01	nms_pass
1	P2S4_171009_051_A01	nms_pass
1	P2S4_171009_053_A01	nms_pass
1	P2S4_171025_055_A01	nms_pass
1	P2S4_171220_054_A01	nms_pass
1	P2S4_180130_051_A01	nms_pass
1	P2S4_180227_053_A01	nms_pass
1	P2S4_180321_053_A01	nms_pass
1	P2S4_180523_051_A01	nms_pass
1	P2S4_180613_054_A01	nms_pass
1	P2S4_180619_056_A01	nms_pass
1	P2S4_180703_051_A01	nms_pass
1	P2S4_180703_052_A01	nms_pass
1	P2S4_180813_051_A01	nms_pass
1	P8S4_170928_352_A01	nms_pass
1	P8S4_171009_354_A01	nms_pass
1	P8S4_171010_355_A01	nms_pass
1	P8S4_171025_354_A01	nms_pass
1	P8S4_171025_355_A01	nms_pass
1	P8S4_171025_356_A01	nms_pass
1	P8S4_171027_354_A01	nms_pass
1	P8S4_171212_351_A01	nms_pass
1	P8S4_180112_352_A01	nms_pass
1	P8S4_180112_355_A01	nms_pass
1	P8S4_180122_354_A01	nms_pass
1	P8S4_180124_354_A01	nms_pass
1	P8S4_180124_357_A01	nms_pass
1	P8S4_180320_354_A01	nms_pass
1	P8S4_180321_354_A01	nms_pass
1	P8S4_180327_352_A01	nms_pass
1	P8S4_180328_353_A01	nms_pass
1	P8S4_180427_354_A01	nms_pass
1	P8S4_180523_357_A01	nms_pass
1	P8S4_180524_352_A01	nms_pass
1	P8S4_180611_354_A01	nms_pass
1	P8S4_180611_355_A01	nms_pass
1	P8S4_180612_354_A01	nms_pass
1	P8S4_180702_353_A01	nms_pass
1	P8S4_180703_354_A01	nms_pass
1	P8S4_180703_355_A01	nms_pass
1	P8S4_180806_360_A01	nms_pass
1	P8S4_180807_359_A01	nms_pass
1	P8S4_180810_353_A01	nms_pass
1	P8S4_180829_360_A01	nms_pass
1	P8S4_190307_354_A01	nms_pass
1	P8S4_190620_351_A01	nms_pass
1	P9S4_170921_402_A01	nms_pass
1	P9S4_171002_402_A01	nms_pass
1	P9S4_171003_401_A01	nms_pass
1	P9S4_171004_409_A01	nms_pass
1	P9S4_171016_403_A01	nms_pass
1	P9S4_171025_405_A01	nms_pass
1	P9S4_171206_406_A01	nms_pass
1	P9S4_171206_407_A01	nms_pass
1	P9S4_171212_401_A01	nms_pass
1	P9S4_171221_403_A01	nms_pass
1	P9S4_180123_405_A01	nms_pass
1	P9S4_180124_406_A01	nms_pass
1	P9S4_180125_403_A01	nms_pass
1	P9S4_180320_404_A01	nms_pass
1	P9S4_180320_406_A01	nms_pass
1	P9S4_180406_406_A01	nms_pass
1	P9S4_180411_404_A01	nms_pass
1	P9S4_180411_405_A01	nms_pass
1	P9S4_180427_404_A01	nms_pass
1	P9S4_180514_405_A01	nms_pass
1	P9S4_180612_406_A01	nms_pass
1	P9S4_180612_409_A01	nms_pass
1	P9S4_180613_405_A01	nms_pass
1	P9S4_180613_406_A01	nms_pass
1	P9S4_180619_406_A01	nms_pass
1	P9S4_180626_404_A01	nms_pass
1	P9S4_180626_406_A01	nms_pass
1	P9S4_180706_405_A01	nms_pass
1	P9S4_180730_406_A01	nms_pass
1	P9S4_180809_402_A01	nms_pass
1	PAS4_170921_451_A01	nms_pass
1	PAS4_170922_454_A01	nms_pass
1	PAS4_171006_452_A01	nms_pass
1	PAS4_171219_451_A01	nms_pass
1	PAS4_180123_453_A01	nms_pass
1	PAS4_180319_455_A01	nms_pass
1	PAS4_180411_451_A01	nms_pass
1	PAS4_180416_451_A01	nms_pass
1	PAS4_180523_451_A01	nms_pass
1	PAS4_180619_453_A01	nms_pass
1	PAS4_180702_452_A01	nms_pass
1	PAS4_180706_454_A01	nms_pass
1	PAS4_180906_452_A01	nms_pass
1	PAS4_180906_454_A01	nms_pass
1	PAS4_181017_452_A01	nms_pass
1	PAS4_181217_453_A01	nms_pass
1	PAS4_190218_454_A01	nms_pass
1	PAS4_190218_456_A01	nms_pass
1	PBS4_171006_502_A01	nms_pass
1	PBS4_171010_501_A01	nms_pass
1	PBS4_171013_503_A01	nms_pass
1	PBS4_171024_504_A01	nms_pass
1	PBS4_171024_506_A01	nms_pass
1	PBS4_180206_502_A01	nms_pass
1	PBS4_180703_504_A01	nms_pass
1	PBS4_180821_505_A01	nms_pass
1	PBS4_180821_506_A01	nms_pass
1	PBS4_181016_504_A01	nms_pass
1	PBS4_181017_505_A01	nms_pass
1	PBS4_181017_506_A01	nms_pass
1	PBS4_181129_502_A01	nms_pass
1	PES4_180824_651_A01	nms_pass
1	PES4_181017_656_A01	nms_pass
1	PES4_181022_654_A01	nms_pass
1	PES4_190225_651_A01	nms_pass
1	PES4_190625_656_A01	nms_pass
1	PFS4_181217_704_A01	nms_pass
1	PFS4_190222_702_A01	nms_pass
1	PFS4_190409_704_A01	nms_pass
1	PFS4_190613_706_A01	nms_pass
1	PFS4_190613_708_A01	nms_pass
1	PFS4_190614_703_A01	nms_pass
1	PFS4_190809_701_A01	nms_pass
1	PFS4_200127_701_A01	nms_pass
0.99	P2S4_171009_052_A01	nms_pass
0.99	P8S4_171128_355_A01	nms_pass
0.99	P8S4_180806_361_A01	nms_pass
0.99	PFS4_190401_702_A01	nms_pass
0.97	P8S4_180813_356_A01	nms_pass
0.95	P9S4_180124_404_A01	nms_pass
0.95	P9S4_180809_403_A01	nms_pass
0.94	P8S4_201008_353_A01	nms_pass
0.94	PAS4_181008_453_A01	nms_pass
0.94	PFS4_190510_703_A01	nms_pass
0.93	P1S4_180305_002_A01	nms_pass
0.93	P9S4_170921_403_A01	nms_pass
0.92	P8S4_190215_352_A01	nms_pass
0.92	P9S4_171023_401_A01	nms_pass
0.92	P9S4_180706_406_A01	nms_pass
0.9	PBS4_181019_504_A01	nms_pass
0.86	P2S4_170920_056_A01	nms_pass
0.86	P8S4_180823_355_A01	nms_pass
0.84	PAS4_190412_456_A01	nms_pass
0.83	P9S4_171025_407_A01	nms_pass
0.82	P9S4_180424_403_A01	nms_pass
0.82	PAS4_190401_455_A01	nms_pass
0.82	PAS4_190618_452_A01	nms_pass
0.79	P8S4_170927_357_A01	nms_pass
0.78	P9S4_171206_408_A01	nms_pass
0.76	PBS4_181016_503_A01	nms_pass
0.76	PBS4_181016_505_A01	nms_pass
0.74	P8S4_180806_358_A01	nms_pass
0.73	PAS4_190124_452_A01	nms_pass
1	P2S4_180615_055_A01	nms_pass
1	P2S4_180827_051_A01	nms_pass
1	P2S4_181022_052_A01	nms_pass
1	P2S4_181022_053_A01	nms_pass
1	P8S4_180626_357_A01	nms_pass
1	P8S4_180808_352_A01	nms_pass
1	P8S4_180809_354_A01	nms_pass
1	P8S4_190517_351_A01	nms_pass
1	P9S4_180619_407_A01	nms_pass
1	P9S4_180725_406_A01	nms_pass
1	PAS4_180419_452_A01	nms_pass
1	PAS4_180424_453_A01	nms_pass
1	PAS4_180829_457_A01	nms_pass
1	PAS4_200610_452_A01	nms_pass
1	PAS4_200610_453_A01	nms_pass
1	PES4_190517_652_A01	nms_pass
1	PES4_190523_652_A01	nms_pass
1	PES4_200603_654_A01	nms_pass
1	PFS4_181023_703_A01	nms_pass
1	PFS4_190523_701_A01	nms_pass
1	PFS4_200609_706_A01	nms_pass
1	P8S4_190910_354_A01	nms_pass
1	P8S4_201019_352_A01	nms_pass
1	PAS4_190503_452_A01	nms_pass
1	PAS4_190812_456_A01	nms_pass
1	PAS4_191206_454_A01	nms_pass
1	PES4_190729_653_A01	nms_pass
1	PES4_190815_651_A01	nms_pass
1	PFS4_190429_701_A01	nms_pass
1	PFS4_190909_703_A01	nms_pass
1	PJS4_200817_804_A01	nms_pass
0.99	P1S4_190422_004_A01	nms_pass
0.89	P8S4_190429_355_A01	nms_pass
0.76	PFS4_190830_703_A01	nms_pass
0.73	PAS4_190812_455_A01	nms_pass
1	P1S4_190419_001_A01	nms_pass
1	P1S4_190906_004_A01	nms_pass
0.99	PES4_180820_652_A01	nms_pass
0.98	PBS4_171016_504_A01	nms_pass
0.95	P1S4_190423_002_A01	nms_pass
0.95	PAS4_190729_456_A01	nms_pass
0.93	P2S4_190502_052_A01	nms_pass
0.92	P2S4_190502_051_A01	nms_pass
0.91	PBS4_180626_508_A01	nms_pass
0.89	PBS4_180626_504_A01	nms_pass
0.88	P8S4_181220_351_A01	nms_pass
0.87	PFS4_191206_705_A01	nms_pass
0.86	P1S4_190425_003_A01	nms_pass
0.84	PFS4_190423_701_A01	nms_pass
0.81	PES4_190812_655_A01	nms_pass
0.77	PES4_190813_652_A01	nms_pass
0.77	PFS4_190816_702_A01	nms_pass
0.76	P1S4_190912_003_A01	nms_pass
0.74	P1S4_190426_001_A01	nms_pass
1	P1S4_190423_001_A01	nms_pass
1	P1S4_190812_003_A01	nms_pass
1	P1S4_190905_006_A01	nms_pass
1	P8S4_180316_354_A01	nms_pass
1	P8S4_181015_351_A01	nms_pass
1	P8S4_190729_354_A01	nms_pass
1	P8S4_190729_355_A01	nms_pass
1	P8S4_190829_354_A01	nms_pass
1	P8S4_190910_356_A01	nms_pass
1	P8S4_191209_351_A01	nms_pass
1	P8S4_191209_352_A01	nms_pass
1	P8S4_191209_354_A01	nms_pass
1	PAS4_171207_451_A01	nms_pass
1	PAS4_190423_456_A01	nms_pass
1	PAS4_190621_458_A01	nms_pass
1	PAS4_190813_451_A01	nms_pass
1	PAS4_190909_454_A01	nms_pass
1	PFS4_190423_704_A01	nms_pass
1	PFS4_190805_701_A01	nms_pass
1	PFS4_190812_703_A01	nms_pass
1	PFS4_190910_704_A01	nms_pass
1	PFS4_191101_701_A01	nms_pass
1	PFS4_191203_709_A01	nms_pass
0.99	PAS4_190425_451_A01	nms_pass
0.99	PAS4_190909_452_A01	nms_pass
0.98	P8S4_180702_356_A01	nms_pass
0.95	PAS4_190425_454_A01	nms_pass
0.94	PFS4_190422_702_A01	nms_pass
0.93	P8S4_190830_353_A01	nms_pass
0.92	P1S4_190909_005_A01	nms_pass
0.92	PFS4_191209_701_A01	nms_pass
0.9	P8S4_190228_352_A01	nms_pass
0.87	PFS4_190430_701_A01	nms_pass
0.84	P1S4_190909_003_A01	nms_pass
0.79	PFS4_191209_705_A01	nms_pass
0.75	P9S4_180314_402_A01	nms_pass
0.75	PFS4_191209_702_A01	nms_pass
0.73	P8S4_190426_352_A01	nms_pass
0.72	PAS4_200820_451_A01	nms_pass
0.71	PAS4_190503_451_A01	nms_pass
0.71	PFS4_190910_705_A01	nms_pass
1	P1S4_190807_003_A01	nms_pass
1	P1S4_190813_003_A01	nms_pass
1	P1S4_190905_004_A01	nms_pass
1	P1S4_191203_001_A01	nms_pass
1	P2S4_180627_054_A01	nms_pass
1	P8S4_180524_353_A01	nms_pass
1	P8S4_180626_358_A01	nms_pass
1	P8S4_180702_357_A01	nms_pass
1	P8S4_181220_353_A01	nms_pass
1	P8S4_190419_352_A01	nms_pass
1	P8S4_190425_351_A01	nms_pass
1	P8S4_190426_351_A01	nms_pass
1	P8S4_190426_354_A01	nms_pass
1	P8S4_190429_352_A01	nms_pass
1	P8S4_190429_353_A01	nms_pass
1	P8S4_190430_352_A01	nms_pass
1	P8S4_190430_353_A01	nms_pass
1	P8S4_191209_353_A01	nms_pass
1	P9S4_180626_403_A01	nms_pass
1	PAS4_180502_452_A01	nms_pass
1	PAS4_190423_457_A01	nms_pass
1	PAS4_190425_452_A01	nms_pass
1	PAS4_190425_453_A01	nms_pass
1	PAS4_190426_451_A01	nms_pass
1	PAS4_190429_451_A01	nms_pass
1	PAS4_190502_453_A01	nms_pass
1	PAS4_190503_453_A01	nms_pass
1	PAS4_191205_455_A01	nms_pass
1	PAS4_191206_453_A01	nms_pass
1	PBS4_180509_508_A01	nms_pass
1	PBS4_180629_505_A01	nms_pass
1	PES4_190426_654_A01	nms_pass
1	PES4_190430_652_A01	nms_pass
1	PES4_190503_651_A01	nms_pass
1	PES4_190813_655_A01	nms_pass
1	PES4_190913_655_A01	nms_pass
1	PES4_191205_654_A01	nms_pass
1	PES4_191206_655_A01	nms_pass
1	PFS4_181019_705_A01	nms_pass
1	PFS4_190419_701_A01	nms_pass
1	PFS4_190422_703_A01	nms_pass
1	PFS4_190422_704_A01	nms_pass
1	PFS4_190422_705_A01	nms_pass
1	PFS4_190422_706_A01	nms_pass
1	PFS4_190423_703_A01	nms_pass
1	PFS4_190423_706_A01	nms_pass
1	PFS4_190426_702_A01	nms_pass
1	PFS4_190426_703_A01	nms_pass
1	PFS4_190429_702_A01	nms_pass
1	PFS4_190430_702_A01	nms_pass
1	PFS4_190729_702_A01	nms_pass
1	PFS4_190729_703_A01	nms_pass
1	PFS4_190729_704_A01	nms_pass
1	PFS4_190807_703_A01	nms_pass
1	PFS4_190813_705_A01	nms_pass
1	PFS4_190813_706_A01	nms_pass
1	PFS4_190813_707_A01	nms_pass
1	PFS4_190815_703_A01	nms_pass
1	PFS4_190913_703_A01	nms_pass
1	PFS4_191107_703_A01	nms_pass
1	PFS4_191203_705_A01	nms_pass
1	PFS4_191209_703_A01	nms_pass
1	PFS4_191209_704_A01	nms_pass
0.99	P1S4_181220_001_A01	nms_pass
0.99	P2S4_181220_051_A01	nms_pass
0.99	P8S4_191204_353_A01	nms_pass
0.99	PFS4_190909_702_A01	nms_pass
0.98	PAS4_190423_452_A01	nms_pass
0.98	PES4_181130_652_A01	nms_pass
0.98	PES4_190812_654_A01	nms_pass
0.96	P1S4_190422_007_A01	nms_pass
0.96	PAS4_181017_451_A01	nms_pass
0.96	PFS4_180924_702_A01	nms_pass
0.95	P9S4_170921_404_A01	nms_pass
0.95	PFS4_190502_701_A01	nms_pass
0.94	PAS4_191203_452_A01	nms_pass
0.9	P9S4_180627_402_A01	nms_pass
0.89	P8S4_181221_353_A01	nms_pass
0.89	PES4_180928_657_A01	nms_pass
0.86	P8S4_190307_356_A01	nms_pass
0.86	PFS4_180828_702_A01	nms_pass
0.82	PAS4_190426_452_A01	nms_pass
0.81	PAS4_190813_452_A01	nms_pass
0.81	PES4_190812_653_A01	nms_pass
0.76	P8S4_190429_357_A01	nms_pass
0.74	PFS4_190426_701_A01	nms_pass
0.73	PFS4_190805_702_A01	nms_pass
0.72	PFS4_180822_704_A01	nms_pass
0.71	P8S4_180703_357_A01	nms_pass
0.71	P8S4_190426_353_A01	nms_pass
1	PES4_190502_651_A01	nms_pass
1	P1S4_180813_003_A01	nms_pass
1	PAS4_180919_455_A01	nms_pass
1	PBS4_181221_503_A01	nms_pass
0.99	PES4_181005_651_A01	nms_pass
0.99	PES4_190125_651_A01	nms_pass
0.98	PES4_181008_655_A01	nms_pass
0.94	PFS4_180928_704_A01	nms_pass
0.91	PBS4_181003_503_A01	nms_pass
0.89	PFS4_180906_702_A01	nms_pass
0.78	PES4_180928_655_A01	nms_pass
0.72	P2S4_180328_051_A01	nms_pass
1	P2S4_180427_052_A01	nms_pass
0.99	PBS4_180807_507_A01	nms_pass
0.97	PFS4_190219_705_A01	nms_pass
0.95	P9S4_180611_403_A01	nms_pass
0.82	PAS4_170922_452_A01	nms_pass
1	P8S4_171002_354_A01	nms_pass
1	P8S4_180330_356_A01	nms_pass
1	P8S4_180521_357_A01	nms_pass
1	P8S4_180706_357_A01	nms_pass
1	P9S4_180109_401_A01	nms_pass
1	P9S4_180112_404_A01	nms_pass
1	P9S4_180416_405_A01	nms_pass
1	P9S4_180514_408_A01	nms_pass
1	PAS4_180321_453_A01	nms_pass
1	PAS4_180830_453_A01	nms_pass
1	PBS4_180820_504_A01	nms_pass
1	PES4_180924_653_A01	nms_pass
1	PES4_181008_656_A01	nms_pass
1	PES4_181008_657_A01	nms_pass
1	PFS4_181022_704_A01	nms_pass
1	PFS4_181115_703_A01	nms_pass
0.99	P2S4_180830_052_A01	nms_pass
0.99	P8S4_180601_355_A01	nms_pass
0.99	PAS4_180820_456_A01	nms_pass
0.99	PAS4_180829_451_A01	nms_pass
0.98	P8S4_190108_355_A01	nms_pass
0.95	PBS4_180626_501_A01	nms_pass
0.91	P8S4_180411_351_A01	nms_pass
0.9	P9S4_180531_411_A01	nms_pass
0.87	PFS4_181221_702_A01	nms_pass
0.86	P9S4_180320_405_A01	nms_pass
0.81	P8S4_190108_357_A01	nms_pass
0.75	P8S4_180508_352_A01	nms_pass
0.75	PFS4_181115_704_A01	nms_pass
0.74	PFS4_180830_701_A01	nms_pass
0.74	PFS4_181116_701_A01	nms_pass
1	P1S4_180514_007_A01	nms_pass
1	P1S4_180521_004_A01	nms_pass
1	P2S4_171002_055_A01	nms_pass
1	P2S4_171009_054_A01	nms_pass
1	P2S4_180427_055_A01	nms_pass
1	P2S4_180816_054_A01	nms_pass
1	P8S4_170920_351_A01	nms_pass
1	P8S4_180328_351_A01	nms_pass
1	P8S4_180409_352_A01	nms_pass
1	P8S4_180430_355_A01	nms_pass
1	P8S4_180703_352_A01	nms_pass
1	P8S4_180813_360_A01	nms_pass
1	P8S4_180817_356_A01	nms_pass
1	P8S4_180830_351_A01	nms_pass
1	P8S4_180925_356_A01	nms_pass
1	P8S4_190104_357_A01	nms_pass
1	P8S4_190226_351_A01	nms_pass
1	P8S4_190301_352_A01	nms_pass
1	PAS4_180815_451_A01	nms_pass
1	PAS4_190118_454_A01	nms_pass
1	PAS4_190701_458_A01	nms_pass
1	PBS4_171010_502_A01	nms_pass
1	PBS4_180319_504_A01	nms_pass
1	PBS4_181002_513_A01	nms_pass
1	PES4_190124_651_A01	nms_pass
1	PES4_190701_653_A01	nms_pass
1	PFS4_180920_701_A01	nms_pass
1	PFS4_181008_701_A01	nms_pass
1	PFS4_181022_703_A01	nms_pass
1	PFS4_190402_703_A01	nms_pass
1	PFS4_190613_705_A01	nms_pass
0.99	P8S4_180507_353_A01	nms_pass
0.99	P8S4_190402_355_A01	nms_pass
0.99	P9S4_180327_401_A01	nms_pass
0.99	PBS4_180629_508_A01	nms_pass
0.99	PES4_180925_651_A01	nms_pass
0.99	PFS4_190108_708_A01	nms_pass
0.98	P2S4_180514_052_A01	nms_pass
0.98	P8S4_190103_351_A01	nms_pass
0.98	P9S4_180402_403_A01	nms_pass
0.97	PBS4_180626_502_A01	nms_pass
0.97	PXS4_190228_406_A01	nms_pass
0.96	P2S4_180330_055_A01	nms_pass
0.96	P8S4_180319_358_A01	nms_pass
0.95	P9S4_180126_404_A01	nms_pass
0.94	P9S4_180430_401_A01	nms_pass
0.94	PAS4_180817_454_A01	nms_pass
0.93	P1S4_180820_003_A01	nms_pass
0.9	PAS4_180327_451_A01	nms_pass
0.84	P8S4_180314_352_A01	nms_pass
0.82	PFS4_181009_702_A01	nms_pass
0.81	P8S4_171027_353_A01	nms_pass
0.81	PFS4_181009_703_A01	nms_pass
0.75	P8S4_180815_361_A01	nms_pass
0.75	PAS4_190701_457_A01	nms_pass
0.74	PBS4_180404_508_A01	nms_pass
0.72	P2S4_171030_054_A01	nms_pass
0.72	PBS4_181221_501_A01	nms_pass
1	P8S4_170927_353_A01	nms_pass
1	P8S4_180615_351_A01	nms_pass
1	P8S4_180627_356_A01	nms_pass
1	P8S4_190104_356_A01	nms_pass
1	P9S4_170918_405_A01	nms_pass
0.97	P9S4_180126_405_A01	nms_pass
0.93	P2S4_170928_051_A01	nms_pass
0.93	PAS4_181002_453_A01	nms_pass
0.92	P2S4_180625_051_A01	nms_pass
0.92	PBS4_180110_501_A01	nms_pass
0.83	P8S4_180829_351_A01	nms_pass
0.78	PXS4_180724_900_A01	nms_pass
0.75	P9S4_180627_408_A01	nms_pass
1	P1S4_180314_001_A01	nms_pass
1	P1S4_181009_001_A01	nms_pass
1	P2S4_171113_052_A01	nms_pass
1	P2S4_180403_056_A01	nms_pass
1	P8S4_171114_352_A01	nms_pass
1	P8S4_180629_351_A01	nms_pass
1	P8S4_190402_354_A01	nms_pass
1	P9S4_171122_401_A01	nms_pass
1	P9S4_180410_402_A01	nms_pass
1	P9S4_180507_408_A01	nms_pass
1	P9S4_180529_408_A01	nms_pass
1	PAS4_180615_453_A01	nms_pass
1	PAS4_180820_453_A01	nms_pass
1	PAS4_180820_454_A01	nms_pass
1	PAS4_181022_453_A01	nms_pass
1	PBS4_180814_501_A01	nms_pass
1	PBS4_180928_505_A01	nms_pass
1	PBS4_181023_502_A01	nms_pass
1	PES4_180815_651_A01	nms_pass
1	PES4_180820_653_A01	nms_pass
1	PES4_181001_655_A01	nms_pass
0.99	PES4_190809_651_A01	nms_pass
0.98	P9S4_171114_403_A01	nms_pass
0.98	PAS4_180928_457_A01	nms_pass
0.97	PBS4_181002_511_A01	nms_pass
0.96	PBS4_180508_501_A01	nms_pass
0.95	PBS4_181218_501_A01	nms_pass
0.93	P2S4_180110_054_A01	nms_pass
0.92	PBS4_180625_501_A01	nms_pass
0.91	P8S4_180919_352_A01	nms_pass
0.82	PFS4_190702_706_A01	nms_pass
0.78	P2S4_180626_051_A01	nms_pass
0.77	PAS4_180115_456_A01	nms_pass
0.75	P8S4_180814_351_A01	nms_pass
0.73	PAS4_180919_451_A01	nms_pass
1	P1S4_180810_003_A01	nms_pass
1	P9S4_180724_403_A01	nms_pass
1	PAS4_180501_452_A01	nms_pass
1	PBS4_180817_501_A01	nms_pass
0.99	P9S4_180703_403_A01	nms_pass
0.99	PBS4_180627_501_A01	nms_pass
0.96	PXS4_180723_903_A01	nms_pass
0.95	PBS4_180521_507_A01	nms_pass
0.92	P8S4_170706_354_A01	nms_pass
0.91	P8S4_180109_355_A01	nms_pass
0.86	PAS4_180817_452_A01	nms_pass
0.86	PES4_190111_654_A01	nms_pass
0.86	PFS4_190225_703_A01	nms_pass
0.82	P9S4_180501_404_A01	nms_pass
0.8	PAS4_190218_457_A01	nms_pass
0.79	P8S4_170726_355_A01	nms_pass
0.78	P9S4_180507_406_A01	nms_pass
0.77	P8S4_180627_352_A01	nms_pass
0.76	P8S4_180813_354_A01	nms_pass
0.71	PAS4_180820_455_A01	nms_pass
1	P1S4_180201_002_A01	nms_pass
1	P1S4_180327_002_A01	nms_pass
1	P1S4_180427_002_A01	nms_pass
1	P1S4_180814_002_A01	nms_pass
1	P1S4_180815_003_A01	nms_pass
1	P1S4_181008_001_A01	nms_pass
1	P2S4_170929_054_A01	nms_pass
1	P2S4_180330_051_A01	nms_pass
1	P2S4_180629_051_A01	nms_pass
1	P8S4_171004_357_A01	nms_pass
1	P8S4_180117_351_A01	nms_pass
1	P8S4_180205_355_A01	nms_pass
1	P8S4_180330_357_A01	nms_pass
1	P8S4_180409_357_A01	nms_pass
1	P8S4_180507_357_A01	nms_pass
1	P8S4_180521_353_A01	nms_pass
1	P8S4_180521_356_A01	nms_pass
1	P8S4_180612_359_A01	nms_pass
1	P8S4_180625_353_A01	nms_pass
1	P8S4_180806_354_A01	nms_pass
1	P8S4_180806_356_A01	nms_pass
1	P8S4_180813_357_A01	nms_pass
1	P8S4_180817_353_A01	nms_pass
1	P8S4_180829_359_A01	nms_pass
1	P8S4_181008_351_A01	nms_pass
1	P8S4_190107_357_A01	nms_pass
1	P8S4_190401_351_A01	nms_pass
1	P9S4_171004_410_A01	nms_pass
1	P9S4_171221_401_A01	nms_pass
1	P9S4_180514_410_A01	nms_pass
1	PAS4_171113_452_A01	nms_pass
1	PAS4_180108_454_A01	nms_pass
1	PAS4_180111_451_A01	nms_pass
1	PAS4_180118_454_A01	nms_pass
1	PAS4_180118_456_A01	nms_pass
1	PAS4_180206_452_A01	nms_pass
1	PAS4_181015_454_A01	nms_pass
1	PBS4_180502_505_A01	nms_pass
1	PBS4_181130_503_A01	nms_pass
1	PES4_180817_654_A01	nms_pass
1	PFS4_180928_706_A01	nms_pass
1	PFS4_181218_701_A01	nms_pass
1	PFS4_190219_706_A01	nms_pass
0.99	P1S4_180625_002_A01	nms_pass
0.99	P2S4_180206_055_A01	nms_pass
0.99	P8S4_180817_359_A01	nms_pass
0.99	P9S4_170921_401_A01	nms_pass
0.99	PAS4_180508_452_A01	nms_pass
0.99	PAS4_181001_454_A01	nms_pass
0.99	PES4_181113_655_A01	nms_pass
0.99	PFS4_180928_705_A01	nms_pass
0.99	PFS4_190301_702_A01	nms_pass
0.98	P1S4_180827_003_A01	nms_pass
0.98	P1S4_190124_003_A01	nms_pass
0.98	P2S4_180206_054_A01	nms_pass
0.98	P8S4_180109_353_A01	nms_pass
0.98	P8S4_180206_356_A01	nms_pass
0.98	P8S4_180430_356_A01	nms_pass
0.98	P8S4_190401_352_A01	nms_pass
0.98	P9S4_180207_406_A01	nms_pass
0.98	P9S4_180411_401_A01	nms_pass
0.98	P9S4_180507_407_A01	nms_pass
0.98	P9S4_180524_404_A01	nms_pass
0.98	PAS4_171221_451_A01	nms_pass
0.98	PBS4_171009_506_A01	nms_pass
0.98	PES4_190313_651_A01	nms_pass
0.98	PFS4_190118_703_A01	nms_pass
0.97	P2S4_171222_052_A01	nms_pass
0.97	P2S4_180206_053_A01	nms_pass
0.97	P8S4_180201_351_A01	nms_pass
0.97	P9S4_171113_403_A01	nms_pass
0.97	P9S4_171114_407_A01	nms_pass
0.97	PAS4_180129_452_A01	nms_pass
0.96	P1S4_180427_001_A01	nms_pass
0.96	P8S4_180827_356_A01	nms_pass
0.96	PAS4_180827_452_A01	nms_pass
0.96	PBS4_180112_501_A01	nms_pass
0.95	P9S4_171221_404_A01	nms_pass
0.94	P8S4_171020_357_A01	nms_pass
0.94	P9S4_180111_402_A01	nms_pass
0.94	PBS4_180205_505_A01	nms_pass
0.93	P2S4_180111_052_A01	nms_pass
0.92	P8S4_171009_358_A01	nms_pass
0.92	P8S4_180504_351_A01	nms_pass
0.92	P8S4_180806_355_A01	nms_pass
0.92	P9S4_180320_407_A01	nms_pass
0.91	PBS4_171113_504_A01	nms_pass
0.91	PBS4_180524_504_A01	nms_pass
0.91	PES4_180814_652_A01	nms_pass
0.9	P1S4_180702_003_A01	nms_pass
0.9	P1S4_181009_004_A01	nms_pass
0.9	PAS4_180201_451_A01	nms_pass
0.88	P8S4_180816_360_A01	nms_pass
0.88	PBS4_180111_501_A01	nms_pass
0.85	P2S4_180615_052_A01	nms_pass
0.85	P8S4_180817_360_A01	nms_pass
0.85	PBS4_181116_503_A01	nms_pass
0.83	P8S4_180625_352_A01	nms_pass
0.83	P9S4_180529_407_A01	nms_pass
0.82	P8S4_190401_353_A01	nms_pass
0.81	P2S4_171222_053_A01	nms_pass
0.81	P2S4_180206_056_A01	nms_pass
0.81	P8S4_180111_352_A01	nms_pass
0.81	P8S4_180815_362_A01	nms_pass
0.81	P8S4_180816_358_A01	nms_pass
0.8	P8S4_180815_360_A01	nms_pass
0.8	PBS4_180521_502_A01	nms_pass
0.79	P8S4_190402_352_A01	nms_pass
0.78	P2S4_180615_051_A01	nms_pass
0.76	PBS4_180109_501_A01	nms_pass
0.71	P8S4_190104_355_A01	nms_pass
1	P2S4_180123_052_A01	nms_pass
1	P8S4_170824_355_A01	nms_pass
1	P8S4_170825_356_A01	nms_pass
1	P8S4_180427_351_A01	nms_pass
1	P8S4_180427_352_A01	nms_pass
1	P9S4_180112_402_A01	nms_pass
1	PAS4_180118_455_A01	nms_pass
1	PAS4_180827_453_A01	nms_pass
1	PBS4_180112_503_A01	nms_pass
1	PBS4_180207_504_A01	nms_pass
1	PES4_190108_654_A01	nms_pass
0.97	P9S4_180102_402_A01	nms_pass
0.94	P8S4_170823_352_A01	nms_pass
0.93	PAS4_180514_453_A01	nms_pass
0.88	PBS4_180112_502_A01	nms_pass
0.81	PAS4_180112_453_A01	nms_pass
0.72	PAS4_180126_451_A01	nms_pass
1	P2S4_171010_054_A01	nms_pass
1	P2S4_180126_052_A01	nms_pass
1	P2S4_180404_053_A01	nms_pass
1	P8S4_180330_355_A01	nms_pass
1	P9S4_170922_402_A01	nms_pass
1	P9S4_171024_403_A01	nms_pass
1	PFS4_180925_704_A01	nms_pass
0.99	PAS4_180529_456_A01	nms_pass
0.98	PES4_190111_651_A01	nms_pass
0.97	P8S4_180509_355_A01	nms_pass
0.94	P9S4_171114_402_A01	nms_pass
0.91	PES4_181015_651_A01	nms_pass
0.87	P9S4_180625_401_A01	nms_pass
0.84	PFS4_181217_702_A01	nms_pass
0.73	PBS4_180817_503_A01	nms_pass
0.73	PBS4_181003_506_A01	nms_pass
1	P9S4_170918_406_A01	nms_pass
0.96	PFS4_180816_701_A01	nms_pass
0.83	P2S4_170927_051_A01	nms_pass
0.76	PES4_181009_654_A01	nms_pass
1	P1S4_180330_001_A01	nms_pass
1	P1S4_180808_005_A01	nms_pass
1	P1S4_181217_002_A01	nms_pass
1	P1S4_181218_002_A01	nms_pass
1	P1S4_190104_003_A01	nms_pass
1	P1S4_190118_004_A01	nms_pass
1	P1S4_190124_002_A01	nms_pass
1	P1S4_190702_007_A01	nms_pass
1	P2S4_170928_052_A01	nms_pass
1	P2S4_180626_053_A01	nms_pass
1	P2S4_180827_054_A01	nms_pass
1	P8S4_180109_352_A01	nms_pass
1	P8S4_180919_355_A01	nms_pass
1	PBS4_180918_507_A01	nms_pass
1	PBS4_181011_502_A01	nms_pass
1	PBS4_190117_503_A01	nms_pass
1	PES4_181116_651_A01	nms_pass
1	PFS4_190614_707_A01	nms_pass
0.99	P1S4_180827_004_A01	nms_pass
0.99	PFS4_190402_704_A01	nms_pass
0.98	P8S4_180615_355_A01	nms_pass
0.98	P8S4_181011_352_A01	nms_pass
0.98	PFS4_180817_702_A01	nms_pass
0.97	P9S4_171113_402_A01	nms_pass
0.97	PES4_181218_651_A01	nms_pass
0.97	PFS4_180928_702_A01	nms_pass
0.96	P8S4_181008_355_A01	nms_pass
0.96	PAS4_180918_452_A01	nms_pass
0.96	PAS4_190715_455_A01	nms_pass
0.95	P1S4_181217_003_A01	nms_pass
0.95	P8S4_180919_357_A01	nms_pass
0.95	PFS4_180906_701_A01	nms_pass
0.92	P1S4_190104_004_A01	nms_pass
0.92	P2S4_181210_051_A01	nms_pass
0.9	PAS4_181005_455_A01	nms_pass
0.9	PFS4_180919_704_A01	nms_pass
0.85	P8S4_171114_353_A01	nms_pass
0.79	P8S4_180906_352_A01	nms_pass
0.76	P2S4_180816_055_A01	nms_pass
0.75	P1S4_181005_005_A01	nms_pass
1	P1S4_180919_001_A01	nms_pass
1	P1S4_190103_003_A01	nms_pass
1	P1S4_190307_002_A01	nms_pass
1	P1S4_190402_004_A01	nms_pass
1	P2S4_180110_056_A01	nms_pass
1	P2S4_180723_052_A01	nms_pass
1	P2S4_180831_052_A01	nms_pass
1	P8S4_170929_354_A01	nms_pass
1	P8S4_171113_354_A01	nms_pass
1	P8S4_180817_354_A01	nms_pass
1	P8S4_180918_356_A01	nms_pass
1	P8S4_181016_352_A01	nms_pass
1	P8S4_190313_355_A01	nms_pass
1	P9S4_180410_404_A01	nms_pass
1	P9S4_180531_409_A01	nms_pass
1	P9S4_180723_402_A01	nms_pass
1	PAS4_180124_454_A01	nms_pass
1	PAS4_180509_453_A01	nms_pass
1	PAS4_180531_454_A01	nms_pass
1	PAS4_180820_451_A01	nms_pass
1	PAS4_180928_456_A01	nms_pass
1	PAS4_190301_454_A01	nms_pass
1	PBS4_171117_503_A01	nms_pass
1	PBS4_180817_502_A01	nms_pass
1	PBS4_180820_501_A01	nms_pass
1	PBS4_180829_504_A01	nms_pass
1	PBS4_181002_507_A01	nms_pass
1	PFS4_181005_702_A01	nms_pass
1	PFS4_181008_704_A01	nms_pass
0.99	P9S4_180626_401_A01	nms_pass
0.98	P2S4_180126_056_A01	nms_pass
0.98	P8S4_171113_353_A01	nms_pass
0.98	PBS4_180504_502_A01	nms_pass
0.97	P9S4_180613_401_A01	nms_pass
0.96	PES4_190401_652_A01	nms_pass
0.93	P9S4_180403_405_A01	nms_pass
0.92	P1S4_190125_001_A01	nms_pass
0.92	P8S4_190402_353_A01	nms_pass
0.9	PFS4_190715_705_A01	nms_pass
0.87	PAS4_181003_460_A01	nms_pass
0.86	P8S4_180613_353_A01	nms_pass
0.82	P1S4_180906_001_A01	nms_pass
0.82	P8S4_180919_358_A01	nms_pass
0.8	P8S4_170726_357_A01	nms_pass
0.8	PBS4_180924_504_A01	nms_pass
0.78	PAS4_190125_455_A01	nms_pass
0.76	PAS4_180328_451_A01	nms_pass
0.75	PBS4_181113_508_A01	nms_pass
0.74	P8S4_180627_357_A01	nms_pass
0.72	PAS4_171009_453_A01	nms_pass
1	P1S4_180829_003_A01	nms_pass
1	P1S4_190325_002_A01	nms_pass
1	P8S4_180830_353_A01	nms_pass
1	P9S4_180507_401_A01	nms_pass
1	PAS4_190226_451_A01	nms_pass
1	PBS4_181011_505_A01	nms_pass
0.99	P9S4_180529_409_A01	nms_pass
0.99	PAS4_181003_456_A01	nms_pass
0.99	PBS4_190117_505_A01	nms_pass
0.98	PBS4_180824_512_A01	nms_pass
0.98	PBS4_181130_501_A01	nms_pass
0.98	PES4_180928_651_A01	nms_pass
0.98	PES4_181009_651_A01	nms_pass
0.97	P8S4_180928_352_A01	nms_pass
0.96	P1S4_181115_002_A01	nms_pass
0.96	P2S4_180828_051_A01	nms_pass
0.96	P2S4_190402_051_A01	nms_pass
0.96	P6S4_171219_252_A01	nms_pass
0.96	P8S4_170929_355_A01	nms_pass
0.96	P8S4_180703_353_A01	nms_pass
0.96	PAS4_181008_455_A01	nms_pass
0.96	PBS4_181003_504_A01	nms_pass
0.96	PBS4_190117_502_A01	nms_pass
0.95	P2S4_180829_051_A01	nms_pass
0.93	P1S4_180829_001_A01	nms_pass
0.9	P9S4_171114_404_A01	nms_pass
0.85	P1S4_181217_001_A01	nms_pass
0.81	P8S4_180502_356_A01	nms_pass
0.8	PAS4_180820_452_A01	nms_pass
0.78	P8S4_180410_351_A01	nms_pass
0.77	PXS4_180724_901_A01	nms_pass
0.76	P8S4_180925_353_A01	nms_pass
0.76	PAS4_190218_458_A01	nms_pass
0.75	P8S4_180613_355_A01	nms_pass
0.75	PBS4_180501_506_A01	nms_pass
0.73	PAS4_181011_455_A01	nms_pass
0.72	PES4_181009_653_A01	nms_pass
1	P1S4_190107_004_A01	nms_pass
1	P2S4_180817_055_A01	nms_pass
1	P2S4_180822_054_A01	nms_pass
1	P8S4_180205_353_A01	nms_pass
1	P8S4_180320_356_A01	nms_pass
1	P8S4_180413_351_A01	nms_pass
1	P8S4_180508_353_A01	nms_pass
1	P8S4_180822_359_A01	nms_pass
1	P8S4_180822_360_A01	nms_pass
1	P8S4_181009_353_A01	nms_pass
1	P8S4_190301_353_A01	nms_pass
1	P9S4_180727_401_A01	nms_pass
1	PAS4_171024_453_A01	nms_pass
1	PAS4_180501_451_A01	nms_pass
1	PAS4_180830_452_A01	nms_pass
1	PAS4_181115_455_A01	nms_pass
1	PAS4_181217_451_A01	nms_pass
1	PAS4_190118_453_A01	nms_pass
1	PAS4_190325_451_A01	nms_pass
1	PAS4_190702_457_A01	nms_pass
1	PBS4_180727_504_A01	nms_pass
1	PBS4_180814_502_A01	nms_pass
1	PBS4_190117_504_A01	nms_pass
1	PES4_180823_658_A01	nms_pass
1	PES4_190226_651_A01	nms_pass
1	PES4_191108_652_A01	nms_pass
1	PFS4_180823_701_A01	nms_pass
1	PFS4_181011_703_A01	nms_pass
1	PFS4_191108_702_A01	nms_pass
0.99	P2S4_180205_054_A01	nms_pass
0.99	P8S4_180828_351_A01	nms_pass
0.99	PES4_180822_654_A01	nms_pass
0.98	P1S4_190103_002_A01	nms_pass
0.98	P2S4_170921_053_A01	nms_pass
0.98	P8S4_170926_351_A01	nms_pass
0.98	P8S4_180504_352_A01	nms_pass
0.98	P8S4_180514_357_A01	nms_pass
0.98	P8S4_181221_351_A01	nms_pass
0.98	PBS4_171116_501_A01	nms_pass
0.98	PBS4_181221_505_A01	nms_pass
0.98	PES4_181001_653_A01	nms_pass
0.98	PFS4_181218_702_A01	nms_pass
0.97	P2S4_180501_052_A01	nms_pass
0.97	P8S4_180814_353_A01	nms_pass
0.97	P8S4_180817_352_A01	nms_pass
0.97	PFS4_181009_701_A01	nms_pass
0.96	P1S4_190125_002_A01	nms_pass
0.96	P1S4_190401_002_A01	nms_pass
0.96	P8S4_180330_354_A01	nms_pass
0.94	P2S4_180501_053_A01	nms_pass
0.93	P2S4_180219_053_A01	nms_pass
0.93	P8S4_181221_352_A01	nms_pass
0.93	PAS4_201016_453_A01	nms_pass
0.92	PES4_191121_651_A01	nms_pass
0.92	PFS4_190125_701_A01	nms_pass
0.91	P1S4_180828_002_A01	nms_pass
0.91	P8S4_180925_355_A01	nms_pass
0.91	PBS4_180924_503_A01	nms_pass
0.9	P2S4_170920_051_A01	nms_pass
0.89	PBS4_180626_509_A01	nms_pass
0.88	P8S4_180828_352_A01	nms_pass
0.88	PES4_180924_651_A01	nms_pass
0.84	P8S4_180816_361_A01	nms_pass
0.81	PES4_181217_651_A01	nms_pass
0.8	P8S4_180817_357_A01	nms_pass
0.76	PES4_180823_656_A01	nms_pass
0.71	P8S4_180814_354_A01	nms_pass
1	P1S4_190325_001_A01	nms_pass
1	P1S4_190422_006_A01	nms_pass
1	P2S4_180828_052_A01	nms_pass
1	P8S4_181003_351_A01	nms_pass
1	P8S4_191205_353_A01	nms_pass
1	P9S4_180427_402_A01	nms_pass
1	PAS4_180823_459_A01	nms_pass
1	PAS4_180925_454_A01	nms_pass
1	PBS4_180830_502_A01	nms_pass
1	PFS4_180829_701_A01	nms_pass
0.99	PBS4_181221_506_A01	nms_pass
0.99	PES4_180924_652_A01	nms_pass
0.95	PAS4_180830_451_A01	nms_pass
0.92	P1S4_190905_005_A01	nms_pass
0.91	P1S4_180828_001_A01	nms_pass
0.88	PES4_190703_657_A01	nms_pass
0.82	PFS4_190412_703_A01	nms_pass
0.79	P1S4_190117_002_A01	nms_pass
0.79	P1S4_190423_004_A01	nms_pass
0.73	P2S4_180823_057_A01	nms_pass
0.71	P1S4_190426_003_A01	nms_pass
0.71	PAS4_181005_458_A01	nms_pass
1	P1S4_180129_005_A01	nms_pass
1	P1S4_180910_006_A01	nms_pass
1	P1S4_180912_002_A01	nms_pass
1	P1S4_181128_001_A01	nms_pass
1	P1S4_181128_002_A01	nms_pass
1	P1S4_190308_004_A01	nms_pass
1	P1S4_190328_001_A01	nms_pass
1	P2S4_180518_052_A01	nms_pass
1	P2S4_190114_054_A01	nms_pass
1	P8S4_171018_353_A01	nms_pass
1	P8S4_171018_354_A01	nms_pass
1	P8S4_171018_355_A01	nms_pass
1	P8S4_180202_352_A01	nms_pass
1	P8S4_180305_353_A01	nms_pass
1	P8S4_180305_355_A01	nms_pass
1	P8S4_180305_356_A01	nms_pass
1	P8S4_180306_353_A01	nms_pass
1	P8S4_180306_354_A01	nms_pass
1	P8S4_180306_356_A01	nms_pass
1	P8S4_180425_356_A01	nms_pass
1	P8S4_180522_351_A01	nms_pass
1	P8S4_180522_352_A01	nms_pass
1	P8S4_180523_352_A01	nms_pass
1	P8S4_180524_351_A01	nms_pass
1	P8S4_180524_354_A01	nms_pass
1	P8S4_180605_356_A01	nms_pass
1	P8S4_180608_353_A01	nms_pass
1	P8S4_180608_358_A01	nms_pass
1	P8S4_180619_352_A01	nms_pass
1	P8S4_180619_356_A01	nms_pass
1	P8S4_180620_355_A01	nms_pass
1	P8S4_180717_351_A01	nms_pass
1	P8S4_180822_358_A01	nms_pass
1	P8S4_180829_353_A01	nms_pass
1	P8S4_180910_355_A01	nms_pass
1	P8S4_180910_356_A01	nms_pass
1	P8S4_180910_357_A01	nms_pass
1	P8S4_180911_360_A01	nms_pass
1	P8S4_180914_360_A01	nms_pass
1	P8S4_181022_353_A01	nms_pass
1	P8S4_181022_354_A01	nms_pass
1	P8S4_181029_351_A01	nms_pass
1	P8S4_181030_351_A01	nms_pass
1	P8S4_181127_351_A01	nms_pass
1	P8S4_181127_353_A01	nms_pass
1	P8S4_181127_354_A01	nms_pass
1	P8S4_181128_351_A01	nms_pass
1	P8S4_190111_356_A01	nms_pass
1	P8S4_190115_352_A01	nms_pass
1	P8S4_190117_352_A01	nms_pass
1	P8S4_190117_353_A01	nms_pass
1	P8S4_190131_354_A01	nms_pass
1	P8S4_190131_355_A01	nms_pass
1	P8S4_190131_356_A01	nms_pass
1	P8S4_190318_351_A01	nms_pass
1	P8S4_190318_352_A01	nms_pass
1	P8S4_190326_351_A01	nms_pass
1	P8S4_190328_351_A01	nms_pass
1	P8S4_190328_352_A01	nms_pass
1	P8S4_191014_356_A01	nms_pass
1	P8S4_191206_352_A01	nms_pass
1	P9S4_171024_406_A01	nms_pass
1	P9S4_171108_401_A01	nms_pass
1	P9S4_171108_402_A01	nms_pass
1	P9S4_180129_402_A01	nms_pass
1	P9S4_180129_404_A01	nms_pass
1	P9S4_180219_402_A01	nms_pass
1	P9S4_180306_402_A01	nms_pass
1	P9S4_180430_402_A01	nms_pass
1	P9S4_180522_402_A01	nms_pass
1	P9S4_180523_401_A01	nms_pass
1	P9S4_180524_401_A01	nms_pass
1	P9S4_180524_402_A01	nms_pass
1	P9S4_180601_403_A01	nms_pass
1	P9S4_180604_402_A01	nms_pass
1	P9S4_180619_405_A01	nms_pass
1	P9S4_180730_410_A01	nms_pass
1	P9S4_180731_405_A01	nms_pass
1	PAS4_171004_452_A01	nms_pass
1	PAS4_171018_451_A01	nms_pass
1	PAS4_171018_452_A01	nms_pass
1	PAS4_180424_452_A01	nms_pass
1	PAS4_180515_452_A01	nms_pass
1	PAS4_181022_454_A01	nms_pass
1	PAS4_181112_452_A01	nms_pass
1	PAS4_190111_457_A01	nms_pass
1	PAS4_190115_453_A01	nms_pass
1	PAS4_190117_454_A01	nms_pass
1	PAS4_190130_456_A01	nms_pass
1	PAS4_190131_453_A01	nms_pass
1	PAS4_190131_454_A01	nms_pass
1	PAS4_190308_454_A01	nms_pass
1	PAS4_190520_455_A01	nms_pass
1	PAS4_190520_456_A01	nms_pass
1	PAS4_190522_456_A01	nms_pass
1	PAS4_200813_453_A01	nms_pass
1	PAS4_200818_452_A01	nms_pass
1	PAS4_200921_452_A01	nms_pass
1	PBS4_171106_501_A01	nms_pass
1	PBS4_180522_501_A01	nms_pass
1	PBS4_180523_501_A01	nms_pass
1	PBS4_180523_502_A01	nms_pass
1	PBS4_180523_503_A01	nms_pass
1	PBS4_180523_504_A01	nms_pass
1	PBS4_180524_501_A01	nms_pass
1	PBS4_180524_502_A01	nms_pass
1	PBS4_180731_502_A01	nms_pass
1	PBS4_180820_503_A01	nms_pass
1	PES4_180910_651_A01	nms_pass
1	PES4_180910_655_A01	nms_pass
1	PES4_181112_651_A01	nms_pass
1	PES4_181112_652_A01	nms_pass
1	PES4_181112_653_A01	nms_pass
1	PES4_190117_653_A01	nms_pass
1	PES4_190131_652_A01	nms_pass
1	PES4_190308_653_A01	nms_pass
1	PES4_190318_651_A01	nms_pass
1	PES4_190318_652_A01	nms_pass
1	PES4_190318_653_A01	nms_pass
1	PES4_190329_652_A01	nms_pass
1	PES4_190329_653_A01	nms_pass
1	PES4_190520_652_A01	nms_pass
1	PES4_190522_652_A01	nms_pass
1	PES4_190522_653_A01	nms_pass
1	PES4_200714_656_A01	nms_pass
1	PFS4_180914_708_A01	nms_pass
1	PFS4_181022_705_A01	nms_pass
1	PFS4_181023_702_A01	nms_pass
1	PFS4_181112_701_A01	nms_pass
1	PFS4_181112_702_A01	nms_pass
1	PFS4_190107_702_A01	nms_pass
1	PFS4_190205_703_A01	nms_pass
1	PFS4_190318_701_A01	nms_pass
1	PFS4_190329_701_A01	nms_pass
1	PFS4_190329_702_A01	nms_pass
1	PFS4_191004_701_A01	nms_pass
1	PFS4_200817_706_A01	nms_pass
1	PJS4_201019_801_A01	nms_pass
1	PJS4_201019_802_A01	nms_pass
1	PXS4_180926_705_A01	nms_pass
0.98	PAS4_171019_451_A01	nms_pass
0.97	P2S4_180306_054_A01	nms_pass
0.97	P8S4_171110_353_A01	nms_pass
0.97	P8S4_180529_351_A01	nms_pass
0.94	P9S4_180522_401_A01	nms_pass
0.91	PES4_190329_654_A01	nms_pass
0.89	PAS4_190522_457_A01	nms_pass
0.88	PFS4_190205_701_A01	nms_pass
0.8	PES4_190520_651_A01	nms_pass
0.71	PFS4_190405_703_A01	nms_pass
1	P1S4_180709_008_A01	nms_pass
1	P2S4_180413_053_A01	nms_pass
1	P2S4_180725_051_A01	nms_pass
1	P2S4_180802_052_A01	nms_pass
1	P8S4_180823_351_A01	nms_pass
1	P8S4_180830_358_A01	nms_pass
1	P8S4_180905_352_A01	nms_pass
1	P9S4_180601_402_A01	nms_pass
1	PAS4_180823_451_A01	nms_pass
1	PAS4_180912_451_A01	nms_pass
1	PAS4_190320_451_A01	nms_pass
1	PBS4_180608_507_A01	nms_pass
1	PES4_181022_651_A01	nms_pass
1	PXS4_180926_004_A01	nms_pass
0.99	P1S4_180709_006_A01	nms_pass
0.99	P9S4_180507_404_A01	nms_pass
0.99	PES4_190510_655_A01	nms_pass
0.98	P9S4_180531_403_A01	nms_pass
0.98	PFS4_190124_701_A01	nms_pass
0.95	P8S4_180227_353_A01	nms_pass
0.92	PAS4_180622_451_A01	nms_pass
0.9	P8S4_190621_355_A01	nms_pass
0.82	PBS4_180720_504_A01	nms_pass
0.78	P1S4_180912_007_A01	nms_pass
0.75	P8S4_171215_358_A01	nms_pass
0.73	P1S4_180130_001_A01	nms_pass
1	P8S4_180618_351_A01	nms_pass
1	P9S4_171004_401_A01	nms_pass
0.98	PFS4_190408_702_A01	nms_pass
0.97	PFS4_190108_702_A01	nms_pass
0.96	PAS4_180829_455_A01	nms_pass
0.93	P9S4_180403_402_A01	nms_pass
0.88	PAS4_190509_453_A01	nms_pass
0.86	P2S4_180305_053_A01	nms_pass
0.85	P8S4_190208_352_A01	nms_pass
0.79	P2S4_180710_059_A01	nms_pass
0.98	P8S4_190520_351_A01	nms_pass
0.97	P8S4_180604_355_A01	nms_pass
0.97	PXS4_180918_052_A01	nms_pass
0.95	P8S4_180706_352_A01	nms_pass
0.95	PAS4_180905_452_A01	nms_pass
0.94	P2S4_180119_052_A01	nms_pass
0.94	P8S4_180706_351_A01	nms_pass
0.94	PFS4_181214_701_A01	nms_pass
0.93	P1S4_180402_001_A01	nms_pass
0.93	P8S4_180319_355_A01	nms_pass
0.92	PBS4_180416_506_A01	nms_pass
0.89	P8S4_190405_357_A01	nms_pass
0.89	PAS4_180918_451_A01	nms_pass
0.89	PBS4_180910_506_A01	nms_pass
0.88	PES4_190328_652_A01	nms_pass
0.87	PES4_190326_651_A01	nms_pass
0.84	P9S4_171003_407_A01	nms_pass
0.79	P8S4_170918_354_A01	nms_pass
0.75	P1S4_181005_003_A01	nms_pass
0.73	PFS4_180918_703_A01	nms_pass
0.71	P1S4_180801_005_A01	nms_pass
1	P1S4_180424_003_A01	nms_pass
1	P1S4_180425_001_A01	nms_pass
1	P1S4_180521_001_A01	nms_pass
1	P1S4_180531_003_A01	nms_pass
1	P1S4_180821_004_A01	nms_pass
1	P1S4_181129_001_A01	nms_pass
1	P1S4_181129_002_A01	nms_pass
1	P1S4_190110_001_A01	nms_pass
1	P1S4_190111_003_A01	nms_pass
1	P1S4_190111_004_A01	nms_pass
1	P1S4_190326_001_A01	nms_pass
1	P1S4_190328_003_A01	nms_pass
1	P2S4_170710_052_A01	nms_pass
1	P2S4_180221_053_A01	nms_pass
1	P2S4_180601_051_A01	nms_pass
1	P2S4_180601_052_A01	nms_pass
1	P2S4_180618_051_A01	nms_pass
1	P2S4_180706_051_A01	nms_pass
1	P2S4_180711_052_A01	nms_pass
1	P2S4_180725_052_A01	nms_pass
1	P2S4_180823_054_A01	nms_pass
1	P2S4_180911_056_A01	nms_pass
1	P2S4_190502_053_A01	nms_pass
1	P8S4_170913_354_A01	nms_pass
1	P8S4_170913_356_A01	nms_pass
1	P8S4_170914_351_A01	nms_pass
1	P8S4_170929_352_A01	nms_pass
1	P8S4_171024_355_A01	nms_pass
1	P8S4_171110_354_A01	nms_pass
1	P8S4_180122_357_A01	nms_pass
1	P8S4_180320_351_A01	nms_pass
1	P8S4_180417_351_A01	nms_pass
1	P8S4_180425_352_A01	nms_pass
1	P8S4_180521_351_A01	nms_pass
1	P8S4_180521_352_A01	nms_pass
1	P8S4_180529_357_A01	nms_pass
1	P8S4_180531_352_A01	nms_pass
1	P8S4_180601_354_A01	nms_pass
1	P8S4_180604_354_A01	nms_pass
1	P8S4_180605_357_A01	nms_pass
1	P8S4_180706_353_A01	nms_pass
1	P8S4_180711_351_A01	nms_pass
1	P8S4_180720_353_A01	nms_pass
1	P8S4_180820_352_A01	nms_pass
1	P8S4_180821_352_A01	nms_pass
1	P8S4_180905_355_A01	nms_pass
1	P8S4_180905_360_A01	nms_pass
1	P8S4_181129_352_A01	nms_pass
1	P8S4_190328_353_A01	nms_pass
1	P8S4_190405_355_A01	nms_pass
1	P8S4_190502_354_A01	nms_pass
1	P8S4_190506_355_A01	nms_pass
1	P8S4_190617_355_A01	nms_pass
1	P8S4_190621_354_A01	nms_pass
1	P9S4_170922_403_A01	nms_pass
1	P9S4_180319_401_A01	nms_pass
1	P9S4_180508_401_A01	nms_pass
1	P9S4_180529_402_A01	nms_pass
1	P9S4_180612_404_A01	nms_pass
1	P9S4_180618_404_A01	nms_pass
1	P9S4_180619_401_A01	nms_pass
1	P9S4_180620_401_A01	nms_pass
1	P9S4_180706_402_A01	nms_pass
1	P9S4_180706_403_A01	nms_pass
1	P9S4_180710_405_A01	nms_pass
1	P9S4_180801_402_A01	nms_pass
1	PAS4_180118_452_A01	nms_pass
1	PAS4_180424_451_A01	nms_pass
1	PAS4_180430_451_A01	nms_pass
1	PAS4_180622_453_A01	nms_pass
1	PAS4_180730_455_A01	nms_pass
1	PAS4_180821_452_A01	nms_pass
1	PAS4_180822_453_A01	nms_pass
1	PAS4_180905_456_A01	nms_pass
1	PAS4_181002_452_A01	nms_pass
1	PAS4_181015_453_A01	nms_pass
1	PAS4_181115_451_A01	nms_pass
1	PAS4_181129_452_A01	nms_pass
1	PAS4_181213_453_A01	nms_pass
1	PAS4_190108_453_A01	nms_pass
1	PAS4_190325_452_A01	nms_pass
1	PAS4_190326_451_A01	nms_pass
1	PAS4_190326_452_A01	nms_pass
1	PAS4_190326_455_A01	nms_pass
1	PAS4_190326_456_A01	nms_pass
1	PAS4_190329_452_A01	nms_pass
1	PAS4_190509_452_A01	nms_pass
1	PAS4_190510_453_A01	nms_pass
1	PAS4_190510_455_A01	nms_pass
1	PAS4_200724_455_A01	nms_pass
1	PBS4_180122_503_A01	nms_pass
1	PBS4_180302_501_A01	nms_pass
1	PBS4_180411_503_A01	nms_pass
1	PBS4_180501_501_A01	nms_pass
1	PBS4_180509_502_A01	nms_pass
1	PBS4_180601_507_A01	nms_pass
1	PBS4_180713_507_A01	nms_pass
1	PBS4_180824_504_A01	nms_pass
1	PBS4_180907_509_A01	nms_pass
1	PBS4_180912_504_A01	nms_pass
1	PBS4_180912_506_A01	nms_pass
1	PBS4_180928_501_A01	nms_pass
1	PBS4_181003_502_A01	nms_pass
1	PBS4_181005_504_A01	nms_pass
1	PBS4_181115_506_A01	nms_pass
1	PES4_180823_652_A01	nms_pass
1	PES4_180823_653_A01	nms_pass
1	PES4_180905_651_A01	nms_pass
[truncated: 17,286 more rows]
