# Supplementary material for: Scaled, high fidelity electrophysiological, morphological, and transcriptomic cell characterization
Source: eLife. 2021 Aug 13;10:e65482. doi: 10.7554/eLife.65482 (PMC8428855; doi:10.7554/eLife.65482)
Supplement: Figure 5—source data 1. [file elife-65482-fig5-data1.csv]

transgenic_line	Pvalb-IRES-Cre	Pvalb-IRES-Cre	Rbp4-Cre_KL100	Rbp4-Cre_KL100	Sst-IRES-Cre	Sst-IRES-Cre	Vip-IRES-Cre	Vip-IRES-Cre
post_patch	nucleus+	nucleus-	nucleus+	nucleus-	nucleus+	nucleus-	nucleus+	nucleus-
1700001L19Rik	0.12371134020618557	0.09090909090909091	0.34523809523809523	0.2894736842105263	0.29533678756476683	0.15267175572519084	0.19607843137254902	0.17894736842105263
1700047M11Rik	0.010309278350515464	0.01818181818181818	0.05952380952380952	0.02631578947368421	0.04404145077720207	0.022900763358778626	0.014705882352941176	0.042105263157894736
1700086L19Rik	0.8762886597938144	0.3090909090909091	0.8095238095238095	0.39473684210526316	0.8911917098445595	0.4732824427480916	0.35294117647058826	0.22105263157894736
2810468N07Rik	0.1134020618556701	0.12727272727272726	0.23809523809523808	0.23684210526315788	0.18393782383419688	0.21374045801526717	0.22058823529411764	0.11578947368421053
3110035E14Rik	0.31958762886597936	0.4	0.8809523809523809	0.5526315789473685	0.38860103626943004	0.37404580152671757	0.3333333333333333	0.42105263157894735
4632428N05Rik	0.1134020618556701	0.12727272727272726	0.11904761904761904	0.23684210526315788	0.21243523316062177	0.17557251908396945	0.15196078431372548	0.17894736842105263
A330050F15Rik	0.7422680412371134	0.3090909090909091	0.14285714285714285	0.21052631578947367	0.5077720207253886	0.3282442748091603	0.3480392156862745	0.29473684210526313
A530058N18Rik	0.7628865979381443	0.2909090909090909	0.03571428571428571	0.05263157894736842	0.6321243523316062	0.2900763358778626	0.6372549019607843	0.3263157894736842
A830009L08Rik	0.08247422680412371	0.09090909090909091	0.32142857142857145	0.18421052631578946	0.07512953367875648	0.06870229007633588	0.09803921568627451	0.09473684210526316
AF251705	0.17525773195876287	0.05454545454545454	0.13095238095238096	0.21052631578947367	0.21243523316062177	0.183206106870229	0.16666666666666666	0.17894736842105263
Acsbg1	0.6288659793814433	0.7272727272727273	0.6309523809523809	0.6052631578947368	0.5958549222797928	0.6183206106870229	0.5490196078431373	0.5894736842105263
Adarb2	0.41237113402061853	0.36363636363636365	0.4880952380952381	0.39473684210526316	0.3860103626943005	0.3282442748091603	0.9656862745098039	0.8105263157894737
Adcyap1	0.030927835051546393	0.03636363636363636	0.5119047619047619	0.23684210526315788	0.04922279792746114	0.030534351145038167	0.0392156862745098	0.08421052631578947
Adora1	0.422680412371134	0.34545454545454546	0.6309523809523809	0.5263157894736842	0.4792746113989637	0.44274809160305345	0.24509803921568626	0.2736842105263158
Adra1b	0.16494845360824742	0.12727272727272726	0.21428571428571427	0.18421052631578946	0.24352331606217617	0.183206106870229	0.7058823529411765	0.49473684210526314
Aif1	0.422680412371134	0.45454545454545453	0.38095238095238093	0.5263157894736842	0.4948186528497409	0.4732824427480916	0.4166666666666667	0.43157894736842106
Ak4	0.15463917525773196	0.21818181818181817	0.30952380952380953	0.2631578947368421	0.17875647668393782	0.16793893129770993	0.16666666666666666	0.17894736842105263
Ak5	0.6288659793814433	0.38181818181818183	0.7023809523809523	0.39473684210526316	0.7849740932642487	0.48091603053435117	0.35784313725490197	0.3263157894736842
Aldh1b1	0.12371134020618557	0.16363636363636364	0.08333333333333333	0.13157894736842105	0.07512953367875648	0.1297709923664122	0.06862745098039216	0.031578947368421054
Aldoc	0.9587628865979382	0.9454545454545454	0.9047619047619048	0.868421052631579	0.9145077720207254	0.9007633587786259	0.9411764705882353	0.9368421052631579
Ankrd33b	0.5876288659793815	0.2727272727272727	0.7738095238095238	0.3684210526315789	0.4740932642487047	0.26717557251908397	0.24509803921568626	0.21052631578947367
Ano3	0.6494845360824743	0.38181818181818183	0.8571428571428571	0.5	0.8497409326424871	0.4961832061068702	0.37745098039215685	0.3368421052631579
Apoe	0.9175257731958762	0.9272727272727272	0.9404761904761905	0.9473684210526315	0.9300518134715026	0.9465648854961832	0.9068627450980392	0.9052631578947369
Aqp4	0.10309278350515463	0.2	0.08333333333333333	0.15789473684210525	0.14507772020725387	0.15267175572519084	0.13725490196078433	0.16842105263157894
Arc	0.41237113402061853	0.3090909090909091	0.8095238095238095	0.42105263157894735	0.6761658031088082	0.4580152671755725	0.27450980392156865	0.28421052631578947
Arhgap25	0.10309278350515463	0.12727272727272726	0.20238095238095238	0.18421052631578946	0.15544041450777202	0.1450381679389313	0.11274509803921569	0.15789473684210525
Arhgef10	0.3711340206185567	0.2	0.2619047619047619	0.15789473684210525	0.39896373056994816	0.21374045801526717	0.1568627450980392	0.16842105263157894
Arl4c	0.7216494845360825	0.34545454545454546	0.27380952380952384	0.21052631578947367	0.6683937823834197	0.5801526717557252	0.6225490196078431	0.5473684210526316
Arx	0.7216494845360825	0.4	0.03571428571428571	0.13157894736842105	0.7331606217616581	0.42748091603053434	0.3333333333333333	0.24210526315789474
Asic4	0.061855670103092786	0.09090909090909091	0.09523809523809523	0.10526315789473684	0.08549222797927461	0.06870229007633588	0.6176470588235294	0.43157894736842106
Aspa	0.020618556701030927	0.10909090909090909	0.09523809523809523	0.05263157894736842	0.08808290155440414	0.05343511450381679	0.09313725490196079	0.11578947368421053
Atp13a4	0.030927835051546393	0.10909090909090909	0.10714285714285714	0.10526315789473684	0.10362694300518134	0.07633587786259542	0.06862745098039216	0.07368421052631578
Atp1a2	0.979381443298969	0.9454545454545454	0.9880952380952381	0.9736842105263158	0.966321243523316	0.9847328244274809	0.9411764705882353	0.9894736842105263
Atp2b4	0.28865979381443296	0.32727272727272727	0.6785714285714286	0.6578947368421053	0.6217616580310881	0.4961832061068702	0.37254901960784315	0.3894736842105263
Atp6ap1l	0.08247422680412371	0.05454545454545454	0.5119047619047619	0.13157894736842105	0.04922279792746114	0.03816793893129771	0.05392156862745098	0.11578947368421053
B230216N24Rik	0.29896907216494845	0.12727272727272726	0.25	0.13157894736842105	0.4637305699481865	0.1450381679389313	0.16176470588235295	0.09473684210526316
BC030499	0.20618556701030927	0.01818181818181818	0.2857142857142857	0.18421052631578946	0.13730569948186527	0.03816793893129771	0.12254901960784313	0.08421052631578947
BC048546	0.20618556701030927	0.16363636363636364	0.40476190476190477	0.4473684210526316	0.20984455958549222	0.13740458015267176	0.19607843137254902	0.22105263157894736
Bcan	0.9175257731958762	0.6363636363636364	0.34523809523809523	0.39473684210526316	0.6398963730569949	0.48091603053435117	0.46078431372549017	0.4
Bcas1	0.3711340206185567	0.5818181818181818	0.44047619047619047	0.3157894736842105	0.5	0.48091603053435117	0.2647058823529412	0.4
Bcl11b	0.7938144329896907	0.36363636363636365	0.4166666666666667	0.3684210526315789	0.7331606217616581	0.5114503816793893	0.19117647058823528	0.21052631578947367
Bdnf	0.2268041237113402	0.2	0.7142857142857143	0.2894736842105263	0.22279792746113988	0.21374045801526717	0.1568627450980392	0.17894736842105263
Bhlhe40	0.5360824742268041	0.3090909090909091	0.8095238095238095	0.631578947368421	0.4430051813471503	0.366412213740458	0.2549019607843137	0.25263157894736843
Bmp3	0.020618556701030927	0.0	0.10714285714285714	0.05263157894736842	0.07772020725388601	0.061068702290076333	0.049019607843137254	0.05263157894736842
Btbd11	0.9587628865979382	0.6	0.15476190476190477	0.18421052631578946	0.772020725388601	0.48854961832061067	0.7794117647058824	0.5157894736842106
Btbd17	0.14432989690721648	0.23636363636363636	0.13095238095238096	0.21052631578947367	0.15284974093264247	0.1450381679389313	0.11764705882352941	0.16842105263157894
C1qa	0.4845360824742268	0.43636363636363634	0.4642857142857143	0.47368421052631576	0.5207253886010362	0.5267175572519084	0.4264705882352941	0.5789473684210527
C1qb	0.5360824742268041	0.509090909090909	0.5238095238095238	0.4473684210526316	0.533678756476684	0.5572519083969466	0.47549019607843135	0.5578947368421052
C1qc	0.4639175257731959	0.4727272727272727	0.39285714285714285	0.42105263157894735	0.5077720207253886	0.48854961832061067	0.37745098039215685	0.42105263157894735
C1ql3	0.07216494845360824	0.07272727272727272	0.19047619047619047	0.23684210526315788	0.05958549222797927	0.03816793893129771	0.07352941176470588	0.11578947368421053
C730002L08Rik	0.061855670103092786	0.03636363636363636	0.44047619047619047	0.05263157894736842	0.031088082901554404	0.007633587786259542	0.049019607843137254	0.08421052631578947
Calb1	0.31958762886597936	0.2909090909090909	0.2857142857142857	0.2631578947368421	0.6865284974093264	0.5114503816793893	0.25	0.25263157894736843
Calb2	0.29896907216494845	0.2909090909090909	0.2857142857142857	0.39473684210526316	0.4948186528497409	0.37404580152671757	0.7598039215686274	0.7052631578947368
Camk4	0.6597938144329897	0.41818181818181815	0.8571428571428571	0.6842105263157895	0.6787564766839378	0.5419847328244275	0.7205882352941176	0.5789473684210527
Car10	0.9381443298969072	0.9636363636363636	0.9880952380952381	0.9736842105263158	0.9792746113989638	0.9847328244274809	0.9656862745098039	0.9894736842105263
Car12	0.18556701030927836	0.18181818181818182	0.27380952380952384	0.3157894736842105	0.19430051813471502	0.183206106870229	0.22058823529411764	0.15789473684210525
Car14	0.041237113402061855	0.09090909090909091	0.08333333333333333	0.0	0.04145077720207254	0.015267175572519083	0.029411764705882353	0.042105263157894736
Cartpt	0.6185567010309279	0.23636363636363636	0.023809523809523808	0.18421052631578946	0.16062176165803108	0.11450381679389313	0.08333333333333333	0.06315789473684211
Cbln2	0.041237113402061855	0.16363636363636364	0.15476190476190477	0.15789473684210525	0.07253886010362694	0.09923664122137404	0.6813725490196079	0.5473684210526316
Cbln4	0.041237113402061855	0.07272727272727272	0.07142857142857142	0.05263157894736842	0.34196891191709844	0.15267175572519084	0.09313725490196079	0.08421052631578947
Cbs	0.21649484536082475	0.16363636363636364	0.23809523809523808	0.2894736842105263	0.25906735751295334	0.2366412213740458	0.20588235294117646	0.21052631578947367
Cck	0.7731958762886598	0.5454545454545454	0.8214285714285714	0.7105263157894737	0.38860103626943004	0.3969465648854962	0.5343137254901961	0.5684210526315789
Cckbr	0.36082474226804123	0.21818181818181817	0.5595238095238095	0.2631578947368421	0.3316062176165803	0.1450381679389313	0.08823529411764706	0.07368421052631578
Cd34	0.09278350515463918	0.18181818181818182	0.38095238095238093	0.13157894736842105	0.08808290155440414	0.09923664122137404	0.10784313725490197	0.11578947368421053
Cd53	0.1134020618556701	0.2	0.14285714285714285	0.18421052631578946	0.21243523316062177	0.183206106870229	0.14705882352941177	0.14736842105263157
Cd68	0.1958762886597938	0.16363636363636364	0.34523809523809523	0.23684210526315788	0.4015544041450777	0.29770992366412213	0.25980392156862747	0.25263157894736843
Cd9	0.20618556701030927	0.18181818181818182	0.2619047619047619	0.23684210526315788	0.22020725388601037	0.2366412213740458	0.2107843137254902	0.2
Cdc42ep1	0.041237113402061855	0.14545454545454545	0.09523809523809523	0.07894736842105263	0.07772020725388601	0.08396946564885496	0.058823529411764705	0.07368421052631578
Cdh12	0.865979381443299	0.8727272727272727	0.9642857142857143	0.8947368421052632	0.8471502590673575	0.7938931297709924	0.9705882352941176	0.8421052631578947
Cdh13	0.8247422680412371	0.5636363636363636	0.7380952380952381	0.5526315789473685	0.9145077720207254	0.732824427480916	0.7549019607843137	0.5894736842105263
Cdh8	0.5670103092783505	0.36363636363636365	0.8452380952380952	0.5526315789473685	0.7901554404145078	0.4351145038167939	0.7549019607843137	0.5052631578947369
Cdh9	0.7525773195876289	0.21818181818181817	0.2619047619047619	0.2894736842105263	0.8316062176165803	0.37404580152671757	0.28921568627450983	0.24210526315789474
Cdkl4	0.1958762886597938	0.12727272727272726	0.3333333333333333	0.15789473684210525	0.23056994818652848	0.15267175572519084	0.16666666666666666	0.08421052631578947
Cercam	0.26804123711340205	0.10909090909090909	0.17857142857142858	0.10526315789473684	0.31865284974093266	0.11450381679389313	0.24019607843137256	0.12631578947368421
Chst8	0.08247422680412371	0.12727272727272726	0.5595238095238095	0.2894736842105263	0.15284974093264247	0.12213740458015267	0.12745098039215685	0.07368421052631578
Cidea	0.07216494845360824	0.14545454545454545	0.14285714285714285	0.23684210526315788	0.13989637305699482	0.08396946564885496	0.43137254901960786	0.2631578947368421
Cldn10	0.32989690721649484	0.21818181818181817	0.23809523809523808	0.23684210526315788	0.38341968911917096	0.3053435114503817	0.19117647058823528	0.16842105263157894
Cldn11	0.08247422680412371	0.18181818181818182	0.10714285714285714	0.05263157894736842	0.09326424870466321	0.061068702290076333	0.1323529411764706	0.07368421052631578
Clic5	0.030927835051546393	0.03636363636363636	0.09523809523809523	0.02631578947368421	0.08808290155440414	0.04580152671755725	0.049019607843137254	0.05263157894736842
Cmtm5	0.27835051546391754	0.41818181818181815	0.32142857142857145	0.5526315789473685	0.4274611398963731	0.4122137404580153	0.39705882352941174	0.37894736842105264
Cnp	0.4639175257731959	0.5272727272727272	0.4880952380952381	0.42105263157894735	0.5414507772020726	0.40458015267175573	0.35294117647058826	0.3894736842105263
Cnr1	0.5154639175257731	0.16363636363636364	0.5952380952380952	0.3157894736842105	0.6658031088082902	0.2595419847328244	0.9166666666666666	0.5894736842105263
Cntnap3	0.845360824742268	0.2727272727272727	0.047619047619047616	0.10526315789473684	0.7823834196891192	0.29770992366412213	0.24509803921568626	0.15789473684210525
Cntnap4	0.9278350515463918	0.5272727272727272	0.5476190476190477	0.39473684210526316	0.7020725388601037	0.3969465648854962	0.5980392156862745	0.3263157894736842
Cntnap5c	0.8762886597938144	0.5636363636363636	0.5357142857142857	0.5526315789473685	0.8082901554404145	0.5190839694656488	0.7990196078431373	0.5473684210526316
Cobl	0.24742268041237114	0.21818181818181817	0.8452380952380952	0.4473684210526316	0.37823834196891193	0.26717557251908397	0.35294117647058826	0.3473684210526316
Coch	0.20618556701030927	0.10909090909090909	0.47619047619047616	0.18421052631578946	0.20725388601036268	0.06870229007633588	0.14705882352941177	0.09473684210526316
Col19a1	0.9484536082474226	0.6909090909090909	0.30952380952380953	0.5526315789473685	0.883419689119171	0.5801526717557252	0.5637254901960784	0.42105263157894735
Col5a1	0.17525773195876287	0.10909090909090909	0.16666666666666666	0.13157894736842105	0.15544041450777202	0.15267175572519084	0.4264705882352941	0.22105263157894736
Col6a1	0.010309278350515464	0.01818181818181818	0.27380952380952384	0.10526315789473684	0.08549222797927461	0.04580152671755725	0.029411764705882353	0.0
Coro6	0.9175257731958762	0.43636363636363634	0.4166666666666667	0.15789473684210525	0.8005181347150259	0.4122137404580153	0.09313725490196079	0.06315789473684211
Cort	0.5567010309278351	0.2909090909090909	0.047619047619047616	0.05263157894736842	0.6269430051813472	0.5267175572519084	0.31862745098039214	0.21052631578947367
Cox6a2	0.8350515463917526	0.4727272727272727	0.05952380952380952	0.07894736842105263	0.07512953367875648	0.11450381679389313	0.2107843137254902	0.2736842105263158
Cplx3	0.05154639175257732	0.05454545454545454	0.11904761904761904	0.02631578947368421	0.04404145077720207	0.015267175572519083	0.06862745098039216	0.042105263157894736
Cpne5	0.3917525773195876	0.45454545454545453	0.5119047619047619	0.47368421052631576	0.772020725388601	0.5954198473282443	0.45588235294117646	0.42105263157894735
Cpne7	0.09278350515463918	0.16363636363636364	0.7380952380952381	0.3684210526315789	0.32124352331606215	0.2366412213740458	0.8578431372549019	0.5263157894736842
Cpne9	0.27835051546391754	0.12727272727272726	0.25	0.18421052631578946	0.2694300518134715	0.1297709923664122	0.27450980392156865	0.2
Crh	0.041237113402061855	0.05454545454545454	0.047619047619047616	0.02631578947368421	0.24611398963730569	0.183206106870229	0.6372549019607843	0.5052631578947369
Crhbp	0.5154639175257731	0.43636363636363634	0.13095238095238096	0.23684210526315788	0.7383419689119171	0.5801526717557252	0.1568627450980392	0.25263157894736843
Crhr1	0.07216494845360824	0.10909090909090909	0.4642857142857143	0.18421052631578946	0.08031088082901554	0.061068702290076333	0.20098039215686275	0.15789473684210525
Crybb1	0.31958762886597936	0.2909090909090909	0.2976190476190476	0.34210526315789475	0.38341968911917096	0.44274809160305345	0.30392156862745096	0.3894736842105263
Crym	0.12371134020618557	0.05454545454545454	0.5	0.39473684210526316	0.06476683937823834	0.04580152671755725	0.04411764705882353	0.08421052631578947
Csf1r	0.29896907216494845	0.34545454545454546	0.38095238095238093	0.34210526315789475	0.4274611398963731	0.37404580152671757	0.29901960784313725	0.3263157894736842
Ctgf	0.14432989690721648	0.05454545454545454	0.11904761904761904	0.05263157894736842	0.04404145077720207	0.030534351145038167	0.16666666666666666	0.06315789473684211
Ctsh	0.27835051546391754	0.21818181818181817	0.25	0.23684210526315788	0.2979274611398964	0.22137404580152673	0.25	0.21052631578947367
Ctss	0.4845360824742268	0.41818181818181815	0.4642857142857143	0.5526315789473685	0.4585492227979275	0.4732824427480916	0.4166666666666667	0.47368421052631576
Cux2	0.7731958762886598	0.45454545454545453	0.4166666666666667	0.23684210526315788	0.7927461139896373	0.4732824427480916	0.44607843137254904	0.43157894736842106
Cx3cr1	0.30927835051546393	0.3090909090909091	0.38095238095238093	0.3157894736842105	0.45077720207253885	0.4580152671755725	0.35784313725490197	0.3894736842105263
Cxcl14	0.4845360824742268	0.38181818181818183	0.42857142857142855	0.3684210526315789	0.4378238341968912	0.5190839694656488	0.6911764705882353	0.6736842105263158
Cyba	0.28865979381443296	0.2545454545454545	0.23809523809523808	0.3157894736842105	0.3316062176165803	0.3282442748091603	0.25980392156862747	0.3368421052631579
Cyp4f15	0.030927835051546393	0.12727272727272726	0.03571428571428571	0.13157894736842105	0.05181347150259067	0.05343511450381679	0.0392156862745098	0.09473684210526316
Cyth4	0.1134020618556701	0.05454545454545454	0.16666666666666666	0.34210526315789475	0.20725388601036268	0.17557251908396945	0.11764705882352941	0.18947368421052632
Daam2	0.28865979381443296	0.18181818181818182	0.21428571428571427	0.21052631578947367	0.4533678756476684	0.2900763358778626	0.45098039215686275	0.3368421052631579
Dbx2	0.17525773195876287	0.2545454545454545	0.20238095238095238	0.23684210526315788	0.27979274611398963	0.2595419847328244	0.22549019607843138	0.2
Dcdc2a	0.23711340206185566	0.2727272727272727	0.44047619047619047	0.3157894736842105	0.3005181347150259	0.17557251908396945	0.30392156862745096	0.23157894736842105
Deptor	0.5257731958762887	0.3090909090909091	0.5833333333333334	0.47368421052631576	0.5077720207253886	0.3893129770992366	0.43137254901960786	0.3473684210526316
Dio2	0.36082474226804123	0.2727272727272727	0.2857142857142857	0.15789473684210525	0.34974093264248707	0.3282442748091603	0.22549019607843138	0.28421052631578947
Dkk3	0.25773195876288657	0.23636363636363636	0.5952380952380952	0.42105263157894735	0.36787564766839376	0.3282442748091603	0.4362745098039216	0.30526315789473685
Dkkl1	0.020618556701030927	0.05454545454545454	0.4880952380952381	0.15789473684210525	0.031088082901554404	0.07633587786259542	0.024509803921568627	0.06315789473684211
Dlx1	0.5257731958762887	0.2	0.0	0.05263157894736842	0.6036269430051814	0.3282442748091603	0.7107843137254902	0.4842105263157895
Dlx1as	0.7422680412371134	0.36363636363636365	0.023809523809523808	0.05263157894736842	0.533678756476684	0.3435114503816794	0.6225490196078431	0.35789473684210527
Dlx2	0.44329896907216493	0.2	0.011904761904761904	0.0	0.31865284974093266	0.19083969465648856	0.46078431372549017	0.29473684210526313
Dlx5	0.5360824742268041	0.2	0.0	0.05263157894736842	0.43005181347150256	0.2595419847328244	0.3088235294117647	0.2
Dlx6os1	0.8762886597938144	0.41818181818181815	0.05952380952380952	0.13157894736842105	0.7772020725388601	0.4351145038167939	0.9166666666666666	0.5894736842105263
Drd1	0.5773195876288659	0.21818181818181817	0.08333333333333333	0.02631578947368421	0.20207253886010362	0.12213740458015267	0.19607843137254902	0.07368421052631578
Dtl	0.09278350515463918	0.10909090909090909	0.5714285714285714	0.23684210526315788	0.11658031088082901	0.07633587786259542	0.0784313725490196	0.09473684210526316
Dusp18	0.18556701030927836	0.14545454545454545	0.3333333333333333	0.21052631578947367	0.35233160621761656	0.2366412213740458	0.20588235294117646	0.11578947368421053
Egr3	0.28865979381443296	0.4	0.5595238095238095	0.47368421052631576	0.5	0.3053435114503817	0.35294117647058826	0.42105263157894735
Egr4	0.5051546391752577	0.2727272727272727	0.7619047619047619	0.4473684210526316	0.49222797927461137	0.33587786259541985	0.29901960784313725	0.2736842105263158
Elfn1	0.15463917525773196	0.09090909090909091	0.14285714285714285	0.10526315789473684	0.8186528497409327	0.46564885496183206	0.696078431372549	0.3473684210526316
Emb	0.6391752577319587	0.32727272727272727	0.5833333333333334	0.3157894736842105	0.4689119170984456	0.25190839694656486	0.3627450980392157	0.25263157894736843
Emr1	0.20618556701030927	0.18181818181818182	0.21428571428571427	0.10526315789473684	0.23056994818652848	0.25190839694656486	0.23529411764705882	0.23157894736842105
Enpp2	0.5567010309278351	0.4	0.6309523809523809	0.42105263157894735	0.4896373056994819	0.3435114503816794	0.47058823529411764	0.3684210526315789
Epha4	0.6597938144329897	0.4909090909090909	0.9047619047619048	0.7894736842105263	0.6709844559585493	0.5801526717557252	0.6813725490196079	0.5578947368421052
Erbb4	0.979381443298969	0.8909090909090909	0.6428571428571429	0.6578947368421053	0.8860103626943006	0.6183206106870229	0.9901960784313726	0.8842105263157894
Ermn	0.1134020618556701	0.09090909090909091	0.047619047619047616	0.07894736842105263	0.09067357512953368	0.10687022900763359	0.10294117647058823	0.11578947368421053
Etv1	0.4639175257731959	0.2909090909090909	0.6547619047619048	0.5	0.3756476683937824	0.25190839694656486	0.25	0.2736842105263158
Exph5	0.1134020618556701	0.16363636363636364	0.36904761904761907	0.15789473684210525	0.09844559585492228	0.10687022900763359	0.11764705882352941	0.15789473684210525
F3	0.08247422680412371	0.16363636363636364	0.15476190476190477	0.15789473684210525	0.35233160621761656	0.19083969465648856	0.1715686274509804	0.12631578947368421
Fa2h	0.13402061855670103	0.09090909090909091	0.11904761904761904	0.02631578947368421	0.10621761658031088	0.061068702290076333	0.09313725490196079	0.11578947368421053
Fam107a	0.6597938144329897	0.6909090909090909	0.6071428571428571	0.5263157894736842	0.7331606217616581	0.7480916030534351	0.6323529411764706	0.7894736842105263
Fam19a1	0.4536082474226804	0.45454545454545453	0.9166666666666666	0.8157894736842105	0.4274611398963731	0.40458015267175573	0.4803921568627451	0.49473684210526314
Fam19a2	0.9484536082474226	0.5636363636363636	0.7380952380952381	0.5526315789473685	0.4844559585492228	0.3816793893129771	0.7647058823529411	0.5263157894736842
Fam84b	0.10309278350515463	0.07272727272727272	0.23809523809523808	0.21052631578947367	0.038860103626943004	0.04580152671755725	0.014705882352941176	0.031578947368421054
Fcer1g	0.4742268041237113	0.41818181818181815	0.4166666666666667	0.3684210526315789	0.4844559585492228	0.5343511450381679	0.35294117647058826	0.4105263157894737
Fcgr3	0.24742268041237114	0.2909090909090909	0.27380952380952384	0.2631578947368421	0.33419689119170987	0.2748091603053435	0.25980392156862747	0.2736842105263158
Fcrls	0.27835051546391754	0.2727272727272727	0.2619047619047619	0.2631578947368421	0.35751295336787564	0.3511450381679389	0.2647058823529412	0.3157894736842105
Fezf2	0.041237113402061855	0.07272727272727272	0.6785714285714286	0.3684210526315789	0.06735751295336788	0.030534351145038167	0.014705882352941176	0.021052631578947368
Fgfr3	0.1134020618556701	0.2909090909090909	0.14285714285714285	0.15789473684210525	0.20984455958549222	0.22900763358778625	0.27941176470588236	0.2
Foxp2	0.9381443298969072	0.9818181818181818	0.9761904761904762	1.0	0.9404145077720207	0.9770992366412213	0.9509803921568627	0.9789473684210527
Fstl5	0.7216494845360825	0.5454545454545454	0.8690476190476191	0.7631578947368421	0.8756476683937824	0.6946564885496184	0.9313725490196079	0.7263157894736842
Fyb	0.13402061855670103	0.12727272727272726	0.20238095238095238	0.15789473684210525	0.19430051813471502	0.1984732824427481	0.1715686274509804	0.17894736842105263
Gabra5	0.3917525773195876	0.32727272727272727	0.5833333333333334	0.34210526315789475	0.27461139896373055	0.16030534351145037	0.2696078431372549	0.3157894736842105
Gabrd	0.9278350515463918	0.5272727272727272	0.5952380952380952	0.47368421052631576	0.47150259067357514	0.3816793893129771	0.28431372549019607	0.21052631578947367
Gad1	1.0	0.7454545454545455	0.17857142857142858	0.2894736842105263	0.9585492227979274	0.7251908396946565	0.9607843137254902	0.8210526315789474
Gad2	0.9484536082474226	0.6181818181818182	0.14285714285714285	0.21052631578947367	0.966321243523316	0.7175572519083969	0.8872549019607843	0.7578947368421053
Gadd45a	0.32989690721649484	0.16363636363636364	0.19047619047619047	0.07894736842105263	0.2823834196891192	0.183206106870229	0.15196078431372548	0.1368421052631579
Gal3st1	0.21649484536082475	0.12727272727272726	0.17857142857142858	0.15789473684210525	0.24870466321243523	0.1450381679389313	0.13725490196078433	0.11578947368421053
Galnt14	0.27835051546391754	0.18181818181818182	0.5238095238095238	0.2631578947368421	0.7823834196891192	0.3511450381679389	0.8284313725490197	0.4631578947368421
Galnt9	0.7319587628865979	0.45454545454545453	0.8095238095238095	0.42105263157894735	0.7227979274611399	0.40458015267175573	0.28431372549019607	0.28421052631578947
Galntl6	0.9690721649484536	0.8909090909090909	0.9523809523809523	0.7631578947368421	0.9818652849740933	0.7862595419847328	0.9558823529411765	0.8526315789473684
Gatm	0.26804123711340205	0.36363636363636365	0.38095238095238093	0.21052631578947367	0.2979274611398964	0.3053435114503817	0.2107843137254902	0.2631578947368421
Gfra2	0.23711340206185566	0.18181818181818182	0.4523809523809524	0.2631578947368421	0.17098445595854922	0.1450381679389313	0.06372549019607843	0.06315789473684211
Gja1	0.1958762886597938	0.34545454545454546	0.20238095238095238	0.2894736842105263	0.21761658031088082	0.22900763358778625	0.12254901960784313	0.23157894736842105
Gjb1	0.07216494845360824	0.09090909090909091	0.047619047619047616	0.07894736842105263	0.07772020725388601	0.09923664122137404	0.058823529411764705	0.042105263157894736
Gjb6	0.17525773195876287	0.3090909090909091	0.20238095238095238	0.2894736842105263	0.20984455958549222	0.22900763358778625	0.14705882352941177	0.17894736842105263
Gjc3	0.13402061855670103	0.18181818181818182	0.10714285714285714	0.07894736842105263	0.08808290155440414	0.09923664122137404	0.058823529411764705	0.06315789473684211
Gltp	0.35051546391752575	0.3090909090909091	0.40476190476190477	0.2631578947368421	0.41968911917098445	0.37404580152671757	0.28921568627450983	0.2736842105263158
Gm11549	0.14432989690721648	0.09090909090909091	0.5952380952380952	0.34210526315789475	0.07772020725388601	0.11450381679389313	0.11274509803921569	0.15789473684210525
Gm12371	0.061855670103092786	0.07272727272727272	0.05952380952380952	0.0	0.08549222797927461	0.0916030534351145	0.10294117647058823	0.08421052631578947
Gm13325	0.061855670103092786	0.03636363636363636	0.05952380952380952	0.05263157894736842	0.05181347150259067	0.007633587786259542	0.0196078431372549	0.010526315789473684
Gm13629	0.9484536082474226	0.38181818181818183	0.21428571428571427	0.15789473684210525	0.5	0.26717557251908397	0.5147058823529411	0.2736842105263158
Gm14204	0.6701030927835051	0.23636363636363636	0.03571428571428571	0.02631578947368421	0.6243523316062176	0.3282442748091603	0.5637254901960784	0.3473684210526316
Gm17750	0.15463917525773196	0.16363636363636364	0.08333333333333333	0.18421052631578946	0.11139896373056994	0.09923664122137404	0.3480392156862745	0.3473684210526316
Gm19410	0.41237113402061853	0.12727272727272726	0.4642857142857143	0.18421052631578946	0.04145077720207254	0.015267175572519083	0.029411764705882353	0.031578947368421054
Gm19744	0.030927835051546393	0.03636363636363636	0.17857142857142858	0.05263157894736842	0.038860103626943004	0.022900763358778626	0.06862745098039216	0.042105263157894736
Gm2164	0.5154639175257731	0.6	0.7023809523809523	0.8157894736842105	0.40414507772020725	0.6641221374045801	0.5588235294117647	0.7157894736842105
Gm2694	0.061855670103092786	0.05454545454545454	0.13095238095238096	0.05263157894736842	0.046632124352331605	0.061068702290076333	0.0196078431372549	0.05263157894736842
Gm30620	0.030927835051546393	0.03636363636363636	0.07142857142857142	0.07894736842105263	0.04404145077720207	0.022900763358778626	0.0392156862745098	0.021052631578947368
Gm34583	0.07216494845360824	0.03636363636363636	0.34523809523809523	0.18421052631578946	0.05699481865284974	0.030534351145038167	0.024509803921568627	0.010526315789473684
Gm34996	0.20618556701030927	0.09090909090909091	0.27380952380952384	0.15789473684210525	0.27979274611398963	0.06870229007633588	0.10784313725490197	0.14736842105263157
Gpd1	0.3402061855670103	0.2	0.39285714285714285	0.2894736842105263	0.29015544041450775	0.21374045801526717	0.6568627450980392	0.5368421052631579
Gpr176	0.9072164948453608	0.36363636363636365	0.2857142857142857	0.13157894736842105	0.49222797927461137	0.24427480916030533	0.6323529411764706	0.4
Gpr183	0.1134020618556701	0.03636363636363636	0.03571428571428571	0.0	0.10103626943005181	0.07633587786259542	0.0784313725490196	0.06315789473684211
Gpr34	0.15463917525773196	0.18181818181818182	0.21428571428571427	0.18421052631578946	0.22279792746113988	0.22137404580152673	0.1568627450980392	0.18947368421052632
Gpr37	0.041237113402061855	0.01818181818181818	0.11904761904761904	0.13157894736842105	0.08549222797927461	0.04580152671755725	0.03431372549019608	0.07368421052631578
Gpr37l1	0.35051546391752575	0.5272727272727272	0.2619047619047619	0.3157894736842105	0.37305699481865284	0.4122137404580153	0.2549019607843137	0.3263157894736842
Gpr83	0.5360824742268041	0.16363636363636364	0.09523809523809523	0.07894736842105263	0.43005181347150256	0.1984732824427481	0.1323529411764706	0.09473684210526316
Gpr88	0.05154639175257732	0.09090909090909091	0.19047619047619047	0.07894736842105263	0.06476683937823834	0.10687022900763359	0.09803921568627451	0.09473684210526316
Grb14	0.29896907216494845	0.2545454545454545	0.36904761904761907	0.2631578947368421	0.35751295336787564	0.2595419847328244	0.2696078431372549	0.16842105263157894
Grik1	0.9072164948453608	0.6181818181818182	0.5	0.3684210526315789	0.9404145077720207	0.6183206106870229	0.803921568627451	0.5263157894736842
Grik3	0.8556701030927835	0.6727272727272727	0.7261904761904762	0.7105263157894737	0.961139896373057	0.7862595419847328	0.6225490196078431	0.7368421052631579
Grin2c	0.12371134020618557	0.12727272727272726	0.05952380952380952	0.15789473684210525	0.14766839378238342	0.09923664122137404	0.08823529411764706	0.08421052631578947
Grin3a	0.32989690721649484	0.23636363636363636	0.2976190476190476	0.15789473684210525	0.8963730569948186	0.6412213740458015	0.4411764705882353	0.29473684210526313
Grm1	0.5360824742268041	0.5818181818181818	0.8690476190476191	0.6842105263157895	0.9041450777202072	0.6870229007633588	0.8088235294117647	0.7263157894736842
Grm2	0.1134020618556701	0.09090909090909091	0.4523809523809524	0.21052631578947367	0.03367875647668394	0.061068702290076333	0.21568627450980393	0.16842105263157894
Grpr	0.020618556701030927	0.01818181818181818	0.03571428571428571	0.0	0.038860103626943004	0.022900763358778626	0.5735294117647058	0.3263157894736842
Gsg1l	0.41237113402061853	0.23636363636363636	0.42857142857142855	0.10526315789473684	0.30310880829015546	0.183206106870229	0.1568627450980392	0.21052631578947367
Gstm1	0.8144329896907216	0.8	0.6666666666666666	0.7631578947368421	0.7849740932642487	0.7633587786259542	0.7401960784313726	0.7894736842105263
Hepacam	0.25773195876288657	0.23636363636363636	0.27380952380952384	0.2631578947368421	0.23316062176165803	0.29770992366412213	0.28921568627450983	0.2
Hmha1	0.061855670103092786	0.03636363636363636	0.13095238095238096	0.10526315789473684	0.15803108808290156	0.16030534351145037	0.0784313725490196	0.1368421052631579
Hpgd	0.13402061855670103	0.18181818181818182	0.16666666666666666	0.10526315789473684	0.16580310880829016	0.19083969465648856	0.11764705882352941	0.14736842105263157
Hpgds	0.25773195876288657	0.16363636363636364	0.2976190476190476	0.21052631578947367	0.3082901554404145	0.26717557251908397	0.25	0.2
Hs3st2	0.1134020618556701	0.14545454545454545	0.7023809523809523	0.3157894736842105	0.15803108808290156	0.11450381679389313	0.3333333333333333	0.2736842105263158
Hs3st4	0.38144329896907214	0.5454545454545454	0.75	0.6052631578947368	0.43005181347150256	0.40458015267175573	0.5441176470588235	0.45263157894736844
Hspb3	0.041237113402061855	0.07272727272727272	0.27380952380952384	0.07894736842105263	0.05958549222797927	0.022900763358778626	0.03431372549019608	0.031578947368421054
Htr3a	0.0	0.0	0.011904761904761904	0.02631578947368421	0.007772020725388601	0.007633587786259542	0.47058823529411764	0.24210526315789474
Ifitm10	0.7731958762886598	0.5272727272727272	0.36904761904761907	0.3684210526315789	0.8160621761658031	0.5648854961832062	0.5098039215686274	0.5157894736842106
Igf1	0.2268041237113402	0.10909090909090909	0.05952380952380952	0.13157894736842105	0.6347150259067358	0.3282442748091603	0.9362745098039216	0.6421052631578947
Igfbp4	0.4536082474226804	0.3090909090909091	0.3333333333333333	0.2631578947368421	0.36787564766839376	0.31297709923664124	0.39215686274509803	0.2736842105263158
Igfbp5	0.1958762886597938	0.3090909090909091	0.3333333333333333	0.39473684210526316	0.27202072538860106	0.2748091603053435	0.5441176470588235	0.42105263157894735
Igfbp6	0.1958762886597938	0.2727272727272727	0.30952380952380953	0.23684210526315788	0.19689119170984457	0.24427480916030533	0.24509803921568626	0.23157894736842105
Igfn1	0.061855670103092786	0.09090909090909091	0.2619047619047619	0.10526315789473684	0.046632124352331605	0.022900763358778626	0.06862745098039216	0.06315789473684211
Igsf21	0.35051546391752575	0.3090909090909091	0.5119047619047619	0.39473684210526316	0.43523316062176165	0.2900763358778626	0.30392156862745096	0.2736842105263158
Igsf3	0.8144329896907216	0.2909090909090909	0.2857142857142857	0.3157894736842105	0.6502590673575129	0.22900763358778625	0.8235294117647058	0.5578947368421052
Il1rapl2	0.711340206185567	0.6727272727272727	0.8333333333333334	0.7894736842105263	0.6787564766839378	0.5877862595419847	0.6470588235294118	0.7368421052631579
Ipcef1	0.16494845360824742	0.2	0.42857142857142855	0.39473684210526316	0.19430051813471502	0.21374045801526717	0.19117647058823528	0.18947368421052632
Itpka	0.21649484536082475	0.2727272727272727	0.7976190476190477	0.5526315789473685	0.24870466321243523	0.22900763358778625	0.3137254901960784	0.3473684210526316
Kcnab3	0.8969072164948454	0.41818181818181815	0.42857142857142855	0.3684210526315789	0.5880829015544041	0.366412213740458	0.37745098039215685	0.2631578947368421
Kcnc2	0.9690721649484536	0.7454545454545455	0.6309523809523809	0.2894736842105263	0.9870466321243523	0.648854961832061	0.803921568627451	0.4421052631578947
Kcng1	0.061855670103092786	0.05454545454545454	0.32142857142857145	0.23684210526315788	0.03367875647668394	0.030534351145038167	0.04411764705882353	0.08421052631578947
Kcnh5	0.4639175257731959	0.23636363636363636	0.5119047619047619	0.3684210526315789	0.6191709844559585	0.3511450381679389	0.29411764705882354	0.30526315789473685
Kcnip1	0.9072164948453608	0.5818181818181818	0.3333333333333333	0.47368421052631576	0.9248704663212435	0.5877862595419847	0.9019607843137255	0.6842105263157895
Kcnip2	0.8969072164948454	0.4909090909090909	0.5119047619047619	0.2631578947368421	0.5906735751295337	0.3893129770992366	0.47549019607843135	0.37894736842105264
Kcnip3	0.30927835051546393	0.2909090909090909	0.8452380952380952	0.5263157894736842	0.41450777202072536	0.31297709923664124	0.4117647058823529	0.3263157894736842
Kcnj10	0.24742268041237114	0.2909090909090909	0.11904761904761904	0.3684210526315789	0.28756476683937826	0.3282442748091603	0.18627450980392157	0.24210526315789474
Kcnmb2	0.9381443298969072	0.41818181818181815	0.25	0.18421052631578946	0.7383419689119171	0.3282442748091603	0.8382352941176471	0.4105263157894737
Kcns3	0.7525773195876289	0.36363636363636365	0.17857142857142858	0.2631578947368421	0.6424870466321243	0.2748091603053435	0.14705882352941177	0.031578947368421054
Kcnv1	0.061855670103092786	0.10909090909090909	0.4880952380952381	0.2894736842105263	0.12694300518134716	0.0916030534351145	0.11274509803921569	0.1368421052631579
Kctd4	0.12371134020618557	0.12727272727272726	0.35714285714285715	0.23684210526315788	0.14248704663212436	0.08396946564885496	0.11274509803921569	0.1368421052631579
Kctd8	0.8556701030927835	0.34545454545454546	0.4523809523809524	0.13157894736842105	0.8704663212435233	0.42748091603053434	0.39215686274509803	0.2
Kit	0.27835051546391754	0.34545454545454546	0.35714285714285715	0.5526315789473685	0.23834196891191708	0.25190839694656486	0.8137254901960784	0.7052631578947368
Klf10	0.15463917525773196	0.12727272727272726	0.5357142857142857	0.2894736842105263	0.20984455958549222	0.16793893129770993	0.12745098039215685	0.12631578947368421
Klf5	0.5670103092783505	0.32727272727272727	0.30952380952380953	0.15789473684210525	0.8082901554404145	0.4351145038167939	0.11274509803921569	0.09473684210526316
Klhdc8a	0.21649484536082475	0.10909090909090909	0.09523809523809523	0.15789473684210525	0.13471502590673576	0.15267175572519084	0.0196078431372549	0.021052631578947368
Krt12	0.15463917525773196	0.10909090909090909	0.5119047619047619	0.3157894736842105	0.07512953367875648	0.06870229007633588	0.20098039215686275	0.14736842105263157
LOC101056001	0.14432989690721648	0.09090909090909091	0.6785714285714286	0.5263157894736842	0.09585492227979274	0.061068702290076333	0.22058823529411764	0.2
LOC102632463	0.05154639175257732	0.07272727272727272	0.07142857142857142	0.13157894736842105	0.015544041450777202	0.015267175572519083	0.5147058823529411	0.35789473684210527
LOC102634502	0.1134020618556701	0.16363636363636364	0.75	0.34210526315789475	0.13730569948186527	0.1297709923664122	0.20588235294117646	0.21052631578947367
LOC105243425	0.08247422680412371	0.07272727272727272	0.03571428571428571	0.02631578947368421	0.2772020725388601	0.09923664122137404	0.029411764705882353	0.0
Lamp5	0.16494845360824742	0.32727272727272727	0.6428571428571429	0.5	0.18393782383419688	0.1450381679389313	0.24019607843137256	0.24210526315789474
Laptm5	0.38144329896907214	0.34545454545454546	0.39285714285714285	0.34210526315789475	0.40414507772020725	0.4580152671755725	0.36764705882352944	0.3473684210526316
Lcat	0.07216494845360824	0.09090909090909091	0.05952380952380952	0.10526315789473684	0.09067357512953368	0.07633587786259542	0.06862745098039216	0.08421052631578947
Lgals1	0.4020618556701031	0.2909090909090909	0.07142857142857142	0.13157894736842105	0.6217616580310881	0.48091603053435117	0.09803921568627451	0.12631578947368421
Lhfpl3	0.7216494845360825	0.5272727272727272	0.5476190476190477	0.5526315789473685	0.8963730569948186	0.5648854961832062	0.7696078431372549	0.6210526315789474
Lhx6	0.7216494845360825	0.32727272727272727	0.023809523809523808	0.05263157894736842	0.8367875647668394	0.5572519083969466	0.03431372549019608	0.021052631578947368
Lingo1	0.3917525773195876	0.2545454545454545	0.8333333333333334	0.6052631578947368	0.6036269430051814	0.3969465648854962	0.5245098039215687	0.3473684210526316
Lmo3	0.6701030927835051	0.43636363636363634	0.5357142857142857	0.42105263157894735	0.6010362694300518	0.45038167938931295	0.3333333333333333	0.29473684210526313
Lpcat2	0.23711340206185566	0.2727272727272727	0.35714285714285715	0.23684210526315788	0.45595854922279794	0.33587786259541985	0.28921568627450983	0.22105263157894736
Lpl	0.5773195876288659	0.2545454545454545	0.08333333333333333	0.10526315789473684	0.11139896373056994	0.08396946564885496	0.05392156862745098	0.10526315789473684
Lrrc38	0.6082474226804123	0.23636363636363636	0.05952380952380952	0.07894736842105263	0.14248704663212436	0.09923664122137404	0.20588235294117646	0.10526315789473684
Ltc4s	0.15463917525773196	0.14545454545454545	0.16666666666666666	0.21052631578947367	0.20984455958549222	0.1984732824427481	0.19117647058823528	0.22105263157894736
Ly6g6e	0.010309278350515464	0.03636363636363636	0.03571428571428571	0.02631578947368421	0.015544041450777202	0.0	0.014705882352941176	0.010526315789473684
Ly86	0.35051546391752575	0.32727272727272727	0.2976190476190476	0.4473684210526316	0.37305699481865284	0.35877862595419846	0.29411764705882354	0.29473684210526313
Lyn	0.3711340206185567	0.36363636363636365	0.36904761904761907	0.7368421052631579	0.41450777202072536	0.5648854961832062	0.4117647058823529	0.5263157894736842
Lypd6	0.44329896907216493	0.2545454545454545	0.25	0.23684210526315788	0.5932642487046632	0.35877862595419846	0.14705882352941177	0.2
Lypd6b	0.5773195876288659	0.2909090909090909	0.14285714285714285	0.07894736842105263	0.6761658031088082	0.3435114503816794	0.1568627450980392	0.15789473684210525
Mafb	0.7628865979381443	0.4727272727272727	0.14285714285714285	0.23684210526315788	0.727979274611399	0.6335877862595419	0.18137254901960784	0.2
Mag	0.061855670103092786	0.12727272727272726	0.05952380952380952	0.15789473684210525	0.09067357512953368	0.13740458015267176	0.10784313725490197	0.08421052631578947
Mal	0.12371134020618557	0.2	0.08333333333333333	0.10526315789473684	0.11917098445595854	0.11450381679389313	0.16176470588235295	0.11578947368421053
Mas1	0.1958762886597938	0.14545454545454545	0.5	0.39473684210526316	0.17616580310880828	0.15267175572519084	0.24019607843137256	0.2736842105263158
Mctp1	0.845360824742268	0.6	0.9285714285714286	0.5789473684210527	0.8860103626943006	0.6335877862595419	0.6911764705882353	0.5894736842105263
Meis2	0.32989690721649484	0.4727272727272727	0.5	0.4473684210526316	0.3290155440414508	0.3511450381679389	0.3088235294117647	0.49473684210526314
Mertk	0.41237113402061853	0.34545454545454546	0.25	0.18421052631578946	0.35751295336787564	0.3511450381679389	0.27450980392156865	0.3684210526315789
Mfge8	0.3711340206185567	0.32727272727272727	0.2976190476190476	0.4473684210526316	0.3082901554404145	0.3969465648854962	0.3284313725490196	0.3263157894736842
Mgat4c	0.9587628865979382	0.7636363636363637	0.7142857142857143	0.8157894736842105	0.883419689119171	0.7022900763358778	0.8774509803921569	0.7473684210526316
Mkx	0.9278350515463918	0.4909090909090909	0.6071428571428571	0.34210526315789475	0.8937823834196891	0.42748091603053434	0.5	0.3473684210526316
Mlc1	0.29896907216494845	0.43636363636363634	0.25	0.23684210526315788	0.3393782383419689	0.44274809160305345	0.22549019607843138	0.3894736842105263
Mmp17	0.35051546391752575	0.23636363636363636	0.6666666666666666	0.47368421052631576	0.5129533678756477	0.29770992366412213	0.38235294117647056	0.24210526315789474
Mobp	0.7010309278350515	0.7636363636363637	0.7142857142857143	0.631578947368421	0.7668393782383419	0.7251908396946565	0.4852941176470588	0.45263157894736844
Mog	0.1134020618556701	0.09090909090909091	0.11904761904761904	0.13157894736842105	0.18652849740932642	0.10687022900763359	0.1568627450980392	0.09473684210526316
Mt2	0.7525773195876289	0.7818181818181819	0.6666666666666666	0.6052631578947368	0.7409326424870466	0.7022900763358778	0.6176470588235294	0.6947368421052632
Myh7	0.3402061855670103	0.36363636363636365	0.36904761904761907	0.3157894736842105	0.34196891191709844	0.366412213740458	0.36764705882352944	0.4421052631578947
Myl4	0.25773195876288657	0.10909090909090909	0.39285714285714285	0.13157894736842105	0.17098445595854922	0.15267175572519084	0.10784313725490197	0.16842105263157894
Myrf	0.08247422680412371	0.03636363636363636	0.09523809523809523	0.0	0.07512953367875648	0.05343511450381679	0.024509803921568627	0.042105263157894736
Nefl	0.7731958762886598	0.7636363636363637	0.8690476190476191	0.7894736842105263	0.7772020725388601	0.732824427480916	0.7401960784313726	0.8315789473684211
Nefm	0.7628865979381443	0.8	0.8809523809523809	0.7894736842105263	0.7694300518134715	0.7633587786259542	0.7254901960784313	0.7684210526315789
Nek7	1.0	0.9272727272727272	0.75	0.868421052631579	0.9041450777202072	0.9312977099236641	0.7647058823529411	0.8842105263157894
Neurod1	0.05154639175257732	0.12727272727272726	0.42857142857142855	0.2894736842105263	0.06476683937823834	0.05343511450381679	0.08333333333333333	0.12631578947368421
Neurod2	0.13402061855670103	0.18181818181818182	0.8214285714285714	0.4473684210526316	0.17098445595854922	0.13740458015267176	0.15196078431372548	0.17894736842105263
Neurod6	0.13402061855670103	0.14545454545454545	0.5714285714285714	0.3684210526315789	0.11398963730569948	0.1297709923664122	0.1323529411764706	0.18947368421052632
Nkx6-2	0.020618556701030927	0.01818181818181818	0.07142857142857142	0.0	0.07772020725388601	0.03816793893129771	0.04411764705882353	0.031578947368421054
Nnat	0.5154639175257731	0.6727272727272727	0.5	0.631578947368421	0.6036269430051814	0.6564885496183206	0.4803921568627451	0.5789473684210527
Nog	0.7422680412371134	0.3090909090909091	0.05952380952380952	0.07894736842105263	0.24093264248704663	0.09923664122137404	0.04411764705882353	0.031578947368421054
Npas1	0.12371134020618557	0.09090909090909091	0.07142857142857142	0.05263157894736842	0.6036269430051814	0.3053435114503817	0.6127450980392157	0.3684210526315789
Npas3	0.8865979381443299	0.4727272727272727	0.5238095238095238	0.3684210526315789	0.9404145077720207	0.5038167938931297	0.9264705882352942	0.6421052631578947
Npr3	0.10309278350515463	0.03636363636363636	0.36904761904761907	0.13157894736842105	0.13212435233160622	0.06870229007633588	0.029411764705882353	0.031578947368421054
Nptx1	0.26804123711340205	0.21818181818181817	0.44047619047619047	0.34210526315789475	0.266839378238342	0.1984732824427481	0.12254901960784313	0.15789473684210525
Nptx2	0.18556701030927836	0.12727272727272726	0.47619047619047616	0.18421052631578946	0.18911917098445596	0.12213740458015267	0.16176470588235295	0.16842105263157894
Npy	0.35051546391752575	0.18181818181818182	0.11904761904761904	0.13157894736842105	0.844559585492228	0.7022900763358778	0.2696078431372549	0.22105263157894736
Nrn1	0.20618556701030927	0.2909090909090909	0.7619047619047619	0.5263157894736842	0.22020725388601037	0.2748091603053435	0.22549019607843138	0.29473684210526313
Nrsn2	0.7731958762886598	0.43636363636363634	0.5238095238095238	0.39473684210526316	0.8730569948186528	0.549618320610687	0.31862745098039214	0.22105263157894736
Ntsr2	0.4536082474226804	0.4	0.4523809523809524	0.3684210526315789	0.4481865284974093	0.4198473282442748	0.38235294117647056	0.35789473684210527
Nwd1	0.30927835051546393	0.32727272727272727	0.19047619047619047	0.18421052631578946	0.36787564766839376	0.3053435114503817	0.25980392156862747	0.25263157894736843
Nwd2	0.5154639175257731	0.2727272727272727	0.8095238095238095	0.3157894736842105	0.45595854922279794	0.2824427480916031	0.4852941176470588	0.3157894736842105
Nxph1	0.9690721649484536	0.5818181818181818	0.21428571428571427	0.18421052631578946	0.9637305699481865	0.7175572519083969	0.3284313725490196	0.17894736842105263
Nxph2	0.1958762886597938	0.09090909090909091	0.047619047619047616	0.0	0.22020725388601037	0.07633587786259542	0.03431372549019608	0.05263157894736842
Nxph3	0.030927835051546393	0.03636363636363636	0.05952380952380952	0.07894736842105263	0.04145077720207254	0.022900763358778626	0.029411764705882353	0.042105263157894736
Nxph4	0.010309278350515464	0.03636363636363636	0.03571428571428571	0.02631578947368421	0.010362694300518135	0.022900763358778626	0.029411764705882353	0.042105263157894736
Olfml3	0.1958762886597938	0.18181818181818182	0.19047619047619047	0.21052631578947367	0.2616580310880829	0.22900763358778625	0.22058823529411764	0.2631578947368421
Olig1	0.26804123711340205	0.34545454545454546	0.2857142857142857	0.3157894736842105	0.28756476683937826	0.2900763358778626	0.16666666666666666	0.30526315789473685
Olig2	0.09278350515463918	0.10909090909090909	0.09523809523809523	0.07894736842105263	0.07253886010362694	0.09923664122137404	0.029411764705882353	0.05263157894736842
Opalin	0.030927835051546393	0.05454545454545454	0.03571428571428571	0.02631578947368421	0.04922279792746114	0.061068702290076333	0.0196078431372549	0.06315789473684211
Oprm1	0.16494845360824742	0.12727272727272726	0.39285714285714285	0.15789473684210525	0.4585492227979275	0.1984732824427481	0.3284313725490196	0.16842105263157894
Ovol2	0.041237113402061855	0.05454545454545454	0.23809523809523808	0.07894736842105263	0.04404145077720207	0.022900763358778626	0.14215686274509803	0.11578947368421053
P2ry12	0.28865979381443296	0.23636363636363636	0.27380952380952384	0.39473684210526316	0.38860103626943004	0.37404580152671757	0.3137254901960784	0.3684210526315789
P2ry13	0.08247422680412371	0.07272727272727272	0.10714285714285714	0.07894736842105263	0.12694300518134716	0.1450381679389313	0.10294117647058823	0.08421052631578947
P2ry6	0.07216494845360824	0.09090909090909091	0.08333333333333333	0.15789473684210525	0.10880829015544041	0.1450381679389313	0.0784313725490196	0.09473684210526316
Palmd	0.14432989690721648	0.07272727272727272	0.38095238095238093	0.23684210526315788	0.13212435233160622	0.08396946564885496	0.0784313725490196	0.08421052631578947
Pamr1	0.05154639175257732	0.09090909090909091	0.5	0.2894736842105263	0.11398963730569948	0.05343511450381679	0.1323529411764706	0.09473684210526316
Parm1	0.7216494845360825	0.43636363636363634	0.5357142857142857	0.34210526315789475	0.2849740932642487	0.17557251908396945	0.4362745098039216	0.3368421052631579
Pcsk5	0.1958762886597938	0.14545454545454545	0.5833333333333334	0.34210526315789475	0.4689119170984456	0.2824427480916031	0.4264705882352941	0.35789473684210527
Pde1a	0.3711340206185567	0.45454545454545453	0.8928571428571429	0.7368421052631579	0.8160621761658031	0.6335877862595419	0.38235294117647056	0.4
Pdlim1	0.1134020618556701	0.07272727272727272	0.4642857142857143	0.2894736842105263	0.08808290155440414	0.11450381679389313	0.06372549019607843	0.021052631578947368
Penk	0.07216494845360824	0.05454545454545454	0.011904761904761904	0.05263157894736842	0.13471502590673576	0.061068702290076333	0.7401960784313726	0.631578947368421
Phldb1	0.4536082474226804	0.2909090909090909	0.30952380952380953	0.3684210526315789	0.5103626943005182	0.32061068702290074	0.39705882352941174	0.30526315789473685
Pla2g16	0.18556701030927836	0.2727272727272727	0.15476190476190477	0.15789473684210525	0.21761658031088082	0.20610687022900764	0.12745098039215685	0.17894736842105263
Pla2g7	0.5154639175257731	0.38181818181818183	0.35714285714285715	0.3157894736842105	0.5103626943005182	0.4580152671755725	0.25980392156862747	0.3684210526315789
Plcd4	0.4845360824742268	0.45454545454545453	0.42857142857142855	0.5789473684210527	0.5207253886010362	0.4122137404580153	0.37254901960784315	0.4631578947368421
Plcxd2	0.41237113402061853	0.2545454545454545	0.5476190476190477	0.39473684210526316	0.28756476683937826	0.22137404580152673	0.4166666666666667	0.37894736842105264
Pld4	0.12371134020618557	0.10909090909090909	0.23809523809523808	0.15789473684210525	0.16062176165803108	0.183206106870229	0.14215686274509803	0.15789473684210525
Plekhb1	0.5463917525773195	0.5636363636363636	0.5	0.5	0.694300518134715	0.6412213740458015	0.46078431372549017	0.5368421052631579
Pllp	0.26804123711340205	0.14545454545454545	0.15476190476190477	0.15789473684210525	0.38082901554404147	0.29770992366412213	0.28921568627450983	0.16842105263157894
Plp1	0.7319587628865979	0.7636363636363637	0.6785714285714286	0.7631578947368421	0.7305699481865285	0.732824427480916	0.6911764705882353	0.6526315789473685
Plxnb3	0.05154639175257732	0.0	0.07142857142857142	0.10526315789473684	0.06217616580310881	0.04580152671755725	0.03431372549019608	0.031578947368421054
Pou3f1	0.13402061855670103	0.10909090909090909	0.35714285714285715	0.34210526315789475	0.09844559585492228	0.11450381679389313	0.12745098039215685	0.11578947368421053
Pou3f2	0.15463917525773196	0.18181818181818182	0.47619047619047616	0.2631578947368421	0.18393782383419688	0.22137404580152673	0.2549019607843137	0.21052631578947367
Ppap2b	0.4329896907216495	0.5272727272727272	0.47619047619047616	0.5263157894736842	0.4896373056994819	0.5038167938931297	0.35784313725490197	0.5052631578947369
Ppp1r1b	0.2268041237113402	0.32727272727272727	0.4166666666666667	0.3157894736842105	0.17875647668393782	0.183206106870229	0.16176470588235295	0.25263157894736843
Ppp1r3g	0.08247422680412371	0.16363636363636364	0.15476190476190477	0.07894736842105263	0.14766839378238342	0.1450381679389313	0.08333333333333333	0.16842105263157894
Prdm8	0.25773195876288657	0.16363636363636364	0.30952380952380953	0.3157894736842105	0.16062176165803108	0.08396946564885496	0.20098039215686275	0.16842105263157894
Prkcg	0.5360824742268041	0.34545454545454546	0.8690476190476191	0.7368421052631579	0.9326424870466321	0.6564885496183206	0.4950980392156863	0.4105263157894737
Prox1	0.13402061855670103	0.05454545454545454	0.05952380952380952	0.21052631578947367	0.05958549222797927	0.030534351145038167	0.8431372549019608	0.6
Prss12	0.14432989690721648	0.03636363636363636	0.39285714285714285	0.2631578947368421	0.12694300518134716	0.04580152671755725	0.07352941176470588	0.10526315789473684
Prss23	0.6804123711340206	0.2727272727272727	0.047619047619047616	0.07894736842105263	0.06217616580310881	0.030534351145038167	0.029411764705882353	0.042105263157894736
Ptgds	0.4329896907216495	0.5454545454545454	0.5119047619047619	0.6052631578947368	0.4585492227979275	0.4580152671755725	0.4950980392156863	0.5157894736842106
Pthlh	0.31958762886597936	0.14545454545454545	0.011904761904761904	0.02631578947368421	0.02072538860103627	0.022900763358778626	0.6813725490196079	0.4105263157894737
Ptk2b	0.4329896907216495	0.509090909090909	0.8571428571428571	0.8947368421052632	0.6709844559585493	0.7022900763358778	0.6470588235294118	0.6631578947368421
Ptpn18	0.23711340206185566	0.16363636363636364	0.23809523809523808	0.34210526315789475	0.2927461139896373	0.22900763358778625	0.23529411764705882	0.22105263157894736
Ptprz1	0.4742268041237113	0.4727272727272727	0.4166666666666667	0.4473684210526316	0.6010362694300518	0.5190839694656488	0.8627450980392157	0.5684210526315789
Pvalb	0.9896907216494846	0.7090909090909091	0.15476190476190477	0.21052631578947367	0.29533678756476683	0.31297709923664124	0.17647058823529413	0.23157894736842105
Pvrl3	0.5051546391752577	0.3090909090909091	0.5119047619047619	0.4473684210526316	0.33678756476683935	0.2748091603053435	0.6127450980392157	0.4421052631578947
Rab26	0.18556701030927836	0.12727272727272726	0.6309523809523809	0.3684210526315789	0.25906735751295334	0.1297709923664122	0.25	0.15789473684210525
Rab3b	0.8865979381443299	0.5636363636363636	0.4880952380952381	0.42105263157894735	0.961139896373057	0.7557251908396947	0.553921568627451	0.37894736842105264
Rai14	0.07216494845360824	0.01818181818181818	0.19047619047619047	0.02631578947368421	0.09585492227979274	0.030534351145038167	0.22549019607843138	0.10526315789473684
Ramp3	0.18556701030927836	0.16363636363636364	0.09523809523809523	0.07894736842105263	0.04922279792746114	0.03816793893129771	0.049019607843137254	0.09473684210526316
Rasal1	0.13402061855670103	0.12727272727272726	0.6071428571428571	0.2894736842105263	0.19430051813471502	0.15267175572519084	0.14705882352941177	0.25263157894736843
Rasgrf2	0.9072164948453608	0.7090909090909091	0.7023809523809523	0.3684210526315789	0.9041450777202072	0.6564885496183206	0.7107843137254902	0.6526315789473685
Rasgrp1	0.6701030927835051	0.41818181818181815	0.8809523809523809	0.631578947368421	0.6373056994818653	0.4351145038167939	0.38235294117647056	0.3684210526315789
Rasl10a	0.16494845360824742	0.16363636363636364	0.17857142857142858	0.18421052631578946	0.16062176165803108	0.15267175572519084	0.22058823529411764	0.14736842105263157
Rbm24	0.4845360824742268	0.2	0.6904761904761905	0.5263157894736842	0.23575129533678757	0.11450381679389313	0.07352941176470588	0.08421052631578947
Rbp4	0.4742268041237113	0.2545454545454545	0.7023809523809523	0.2894736842105263	0.8419689119170984	0.48091603053435117	0.29411764705882354	0.14736842105263157
Reln	0.4329896907216495	0.21818181818181817	0.4523809523809524	0.21052631578947367	0.8341968911917098	0.48091603053435117	0.3382352941176471	0.17894736842105263
Rgs10	0.5360824742268041	0.45454545454545453	0.5714285714285714	0.6842105263157895	0.5906735751295337	0.5648854961832062	0.8725490196078431	0.7894736842105263
Rgs14	0.09278350515463918	0.09090909090909091	0.20238095238095238	0.2631578947368421	0.07253886010362694	0.07633587786259542	0.09803921568627451	0.11578947368421053
Rgs8	0.15463917525773196	0.23636363636363636	0.10714285714285714	0.21052631578947367	0.31865284974093266	0.2748091603053435	0.7401960784313726	0.5157894736842106
Rhog	0.2268041237113402	0.23636363636363636	0.23809523809523808	0.23684210526315788	0.37305699481865284	0.2595419847328244	0.20588235294117646	0.25263157894736843
Rims3	0.30927835051546393	0.2909090909090909	0.40476190476190477	0.3157894736842105	0.7124352331606217	0.4580152671755725	0.6176470588235294	0.6210526315789474
Rnase4	0.24742268041237114	0.34545454545454546	0.2619047619047619	0.18421052631578946	0.3316062176165803	0.31297709923664124	0.2107843137254902	0.24210526315789474
Rorb	0.4329896907216495	0.43636363636363634	0.5952380952380952	0.5789473684210527	0.4274611398963731	0.37404580152671757	0.47058823529411764	0.47368421052631576
Rpp25	0.6907216494845361	0.2909090909090909	0.08333333333333333	0.10526315789473684	0.7616580310880829	0.46564885496183206	0.6421568627450981	0.3473684210526316
Rprm	0.061855670103092786	0.09090909090909091	0.15476190476190477	0.2631578947368421	0.05699481865284974	0.061068702290076333	0.1323529411764706	0.16842105263157894
Rprml	0.2268041237113402	0.18181818181818182	0.8452380952380952	0.631578947368421	0.25129533678756477	0.24427480916030533	0.16176470588235295	0.25263157894736843
Rspo1	0.05154639175257732	0.09090909090909091	0.03571428571428571	0.02631578947368421	0.03367875647668394	0.030534351145038167	0.16176470588235295	0.1368421052631579
Rtn4r	0.13402061855670103	0.05454545454545454	0.7619047619047619	0.39473684210526316	0.10621761658031088	0.0916030534351145	0.24509803921568626	0.23157894736842105
Rtn4rl1	0.8350515463917526	0.34545454545454546	0.6309523809523809	0.5263157894736842	0.5414507772020726	0.35877862595419846	0.3284313725490196	0.25263157894736843
Rtn4rl2	0.13402061855670103	0.09090909090909091	0.5714285714285714	0.42105263157894735	0.14507772020725387	0.0916030534351145	0.09313725490196079	0.12631578947368421
S100a1	0.5670103092783505	0.6	0.5833333333333334	0.631578947368421	0.6139896373056994	0.6183206106870229	0.5196078431372549	0.6210526315789474
S100a13	0.4020618556701031	0.5636363636363636	0.4523809523809524	0.5	0.4637305699481865	0.4961832061068702	0.3431372549019608	0.4421052631578947
S100a16	0.4845360824742268	0.7454545454545455	0.44047619047619047	0.6052631578947368	0.48704663212435234	0.5343511450381679	0.4019607843137255	0.49473684210526314
S1pr1	0.23711340206185566	0.36363636363636365	0.23809523809523808	0.2631578947368421	0.32124352331606215	0.37404580152671757	0.21568627450980393	0.3684210526315789
Satb1	0.9587628865979382	0.6727272727272727	0.9166666666666666	0.6052631578947368	0.966321243523316	0.7175572519083969	0.6323529411764706	0.6105263157894737
Satb2	0.3402061855670103	0.45454545454545453	0.9523809523809523	0.6842105263157895	0.36787564766839376	0.40458015267175573	0.43137254901960786	0.45263157894736844
Scube1	0.16494845360824742	0.2545454545454545	0.7261904761904762	0.3684210526315789	0.13730569948186527	0.11450381679389313	0.09803921568627451	0.16842105263157894
Sdc4	0.21649484536082475	0.2545454545454545	0.19047619047619047	0.18421052631578946	0.22538860103626943	0.2595419847328244	0.16666666666666666	0.16842105263157894
Selplg	0.35051546391752575	0.4	0.36904761904761907	0.42105263157894735	0.422279792746114	0.4351145038167939	0.3382352941176471	0.30526315789473685
Sema3c	0.08247422680412371	0.10909090909090909	0.16666666666666666	0.18421052631578946	0.16580310880829016	0.12213740458015267	0.5784313725490197	0.3473684210526316
Sema3e	0.6391752577319587	0.6181818181818182	0.7857142857142857	0.6842105263157895	0.6398963730569949	0.5038167938931297	0.7058823529411765	0.5894736842105263
Sepp1	0.5257731958762887	0.5454545454545454	0.4166666666666667	0.5526315789473685	0.5103626943005182	0.5877862595419847	0.3627450980392157	0.5157894736842106
Serinc2	0.041237113402061855	0.10909090909090909	0.2261904761904762	0.10526315789473684	0.05699481865284974	0.03816793893129771	0.03431372549019608	0.021052631578947368
Siglech	0.38144329896907214	0.2727272727272727	0.23809523809523808	0.3157894736842105	0.32642487046632124	0.29770992366412213	0.27450980392156865	0.3157894736842105
Slc17a6	0.061855670103092786	0.16363636363636364	0.11904761904761904	0.05263157894736842	0.07253886010362694	0.07633587786259542	0.09803921568627451	0.12631578947368421
Slc17a7	0.44329896907216493	0.43636363636363634	0.9642857142857143	0.8947368421052632	0.4637305699481865	0.4351145038167939	0.38235294117647056	0.47368421052631576
Slc1a3	0.6185567010309279	0.7272727272727273	0.4642857142857143	0.5526315789473685	0.6502590673575129	0.6793893129770993	0.5196078431372549	0.6842105263157895
Slc25a18	0.5670103092783505	0.36363636363636365	0.44047619047619047	0.34210526315789475	0.6373056994818653	0.4580152671755725	0.37745098039215685	0.4631578947368421
Slc26a4	0.12371134020618557	0.09090909090909091	0.4166666666666667	0.23684210526315788	0.06994818652849741	0.07633587786259542	0.0784313725490196	0.05263157894736842
Slc30a3	0.7525773195876289	0.509090909090909	0.5476190476190477	0.5526315789473685	0.8575129533678757	0.5419847328244275	0.3872549019607843	0.3263157894736842
Slc32a1	0.8041237113402062	0.38181818181818183	0.0	0.02631578947368421	0.8393782383419689	0.5267175572519084	0.7254901960784313	0.4105263157894737
Slc38a3	0.07216494845360824	0.18181818181818182	0.11904761904761904	0.21052631578947367	0.16839378238341968	0.13740458015267176	0.08823529411764706	0.10526315789473684
Slc39a12	0.16494845360824742	0.2	0.21428571428571427	0.18421052631578946	0.13730569948186527	0.1450381679389313	0.12745098039215685	0.12631578947368421
Slc6a1	1.0	0.7818181818181819	0.20238095238095238	0.34210526315789475	0.9792746113989638	0.8473282442748091	0.9166666666666666	0.7263157894736842
Slc7a10	0.1134020618556701	0.16363636363636364	0.21428571428571427	0.21052631578947367	0.18911917098445596	0.1297709923664122	0.10294117647058823	0.09473684210526316
Slco1c1	0.09278350515463918	0.12727272727272726	0.05952380952380952	0.18421052631578946	0.10103626943005181	0.061068702290076333	0.14215686274509803	0.07368421052631578
Slco2b1	0.061855670103092786	0.05454545454545454	0.08333333333333333	0.05263157894736842	0.15803108808290156	0.1297709923664122	0.11274509803921569	0.11578947368421053
Sorcs1	0.44329896907216493	0.4909090909090909	0.9166666666666666	0.7368421052631579	0.4844559585492228	0.48854961832061067	0.9068627450980392	0.7368421052631579
Sorcs3	0.422680412371134	0.3090909090909091	0.5833333333333334	0.34210526315789475	0.43523316062176165	0.32061068702290074	0.9607843137254902	0.6526315789473685
Sox10	0.10309278350515463	0.18181818181818182	0.05952380952380952	0.05263157894736842	0.08808290155440414	0.061068702290076333	0.05392156862745098	0.08421052631578947
Sox6	0.9175257731958762	0.6181818181818182	0.32142857142857145	0.5	0.927461139896373	0.5648854961832062	0.29411764705882354	0.28421052631578947
Sox9	0.31958762886597936	0.4	0.4642857142857143	0.34210526315789475	0.33419689119170987	0.31297709923664124	0.23039215686274508	0.29473684210526313
Spi1	0.23711340206185566	0.38181818181818183	0.40476190476190477	0.5263157894736842	0.36787564766839376	0.366412213740458	0.3382352941176471	0.4631578947368421
Sst	0.20618556701030927	0.16363636363636364	0.14285714285714285	0.18421052631578946	0.9585492227979274	0.7862595419847328	0.1323529411764706	0.16842105263157894
Sstr2	0.1134020618556701	0.03636363636363636	0.39285714285714285	0.18421052631578946	0.07253886010362694	0.030534351145038167	0.1323529411764706	0.08421052631578947
Sulf1	0.23711340206185566	0.2909090909090909	0.34523809523809523	0.42105263157894735	0.24870466321243523	0.2366412213740458	0.2647058823529412	0.28421052631578947
Sv2b	0.31958762886597936	0.34545454545454546	0.9047619047619048	0.6052631578947368	0.37823834196891193	0.3282442748091603	0.29901960784313725	0.42105263157894735
Synpr	0.28865979381443296	0.4	0.34523809523809523	0.39473684210526316	0.9507772020725389	0.6564885496183206	0.9509803921568627	0.7684210526315789
Syt17	0.5257731958762887	0.2727272727272727	0.3333333333333333	0.2631578947368421	0.23575129533678757	0.17557251908396945	0.4117647058823529	0.37894736842105264
Syt6	0.09278350515463918	0.07272727272727272	0.047619047619047616	0.07894736842105263	0.31865284974093266	0.1984732824427481	0.2647058823529412	0.15789473684210525
Tac1	0.4536082474226804	0.21818181818181817	0.08333333333333333	0.02631578947368421	0.07253886010362694	0.05343511450381679	0.024509803921568627	0.031578947368421054
Tac2	0.010309278350515464	0.07272727272727272	0.011904761904761904	0.02631578947368421	0.015544041450777202	0.007633587786259542	0.4411764705882353	0.4631578947368421
Tbr1	0.15463917525773196	0.18181818181818182	0.39285714285714285	0.2894736842105263	0.19948186528497408	0.1297709923664122	0.15196078431372548	0.18947368421052632
Tcap	0.4845360824742268	0.23636363636363636	0.023809523809523808	0.05263157894736842	0.046632124352331605	0.015267175572519083	0.029411764705882353	0.021052631578947368
Tcrb	0.3402061855670103	0.2909090909090909	0.4880952380952381	0.34210526315789475	0.5181347150259067	0.2900763358778626	0.4166666666666667	0.29473684210526313
Tekt5	0.08247422680412371	0.01818181818181818	0.10714285714285714	0.05263157894736842	0.04145077720207254	0.03816793893129771	0.06372549019607843	0.021052631578947368
Tesc	0.35051546391752575	0.21818181818181817	0.40476190476190477	0.2894736842105263	0.30310880829015546	0.2900763358778626	0.3137254901960784	0.3157894736842105
Tiam2	0.6597938144329897	0.2909090909090909	0.7619047619047619	0.39473684210526316	0.6683937823834197	0.33587786259541985	0.28921568627450983	0.2736842105263158
Tlcd1	0.12371134020618557	0.14545454545454545	0.11904761904761904	0.13157894736842105	0.14766839378238342	0.15267175572519084	0.07352941176470588	0.09473684210526316
Tmem119	0.15463917525773196	0.2	0.17857142857142858	0.15789473684210525	0.2538860103626943	0.2366412213740458	0.19117647058823528	0.2
Tmem132c	0.9175257731958762	0.41818181818181815	0.2619047619047619	0.18421052631578946	0.5569948186528497	0.2824427480916031	0.23039215686274508	0.16842105263157894
Tmem163	0.23711340206185566	0.2727272727272727	0.6071428571428571	0.23684210526315788	0.23056994818652848	0.1297709923664122	0.23039215686274508	0.21052631578947367
Tmem200a	0.24742268041237114	0.18181818181818182	0.5595238095238095	0.2894736842105263	0.23575129533678757	0.10687022900763359	0.5882352941176471	0.3263157894736842
Tmem40	0.05154639175257732	0.03636363636363636	0.07142857142857142	0.02631578947368421	0.03626943005181347	0.04580152671755725	0.049019607843137254	0.010526315789473684
Tmem88b	0.12371134020618557	0.07272727272727272	0.17857142857142858	0.07894736842105263	0.14507772020725387	0.07633587786259542	0.11274509803921569	0.08421052631578947
Tmem91	0.4845360824742268	0.2545454545454545	0.6547619047619048	0.2894736842105263	0.8626943005181347	0.5190839694656488	0.36764705882352944	0.23157894736842105
Tox	0.3711340206185567	0.3090909090909091	0.8095238095238095	0.3684210526315789	0.7616580310880829	0.4351145038167939	0.3235294117647059	0.25263157894736843
Trem2	0.28865979381443296	0.2545454545454545	0.2619047619047619	0.34210526315789475	0.3290155440414508	0.366412213740458	0.29901960784313725	0.3157894736842105
Trf	0.4020618556701031	0.3090909090909091	0.40476190476190477	0.2894736842105263	0.4637305699481865	0.3969465648854962	0.29901960784313725	0.4
Trhde	0.5257731958762887	0.2909090909090909	0.7738095238095238	0.47368421052631576	0.9093264248704663	0.48091603053435117	0.7107843137254902	0.5473684210526316
Tsc22d4	0.8350515463917526	0.7272727272727273	0.6190476190476191	0.5789473684210527	0.7772020725388601	0.6717557251908397	0.5784313725490197	0.5894736842105263
Txnip	0.16494845360824742	0.09090909090909091	0.08333333333333333	0.07894736842105263	0.10621761658031088	0.07633587786259542	0.07352941176470588	0.031578947368421054
Tyrobp	0.5773195876288659	0.45454545454545453	0.4523809523809524	0.47368421052631576	0.5569948186528497	0.6030534351145038	0.4950980392156863	0.49473684210526314
Ugt8a	0.14432989690721648	0.16363636363636364	0.21428571428571427	0.13157894736842105	0.15284974093264247	0.1297709923664122	0.1568627450980392	0.2
Unc5d	0.9175257731958762	0.7090909090909091	0.7976190476190477	0.5789473684210527	0.7150259067357513	0.5190839694656488	0.4803921568627451	0.5578947368421052
Unc93b1	0.24742268041237114	0.2545454545454545	0.23809523809523808	0.2894736842105263	0.25129533678756477	0.25190839694656486	0.1715686274509804	0.24210526315789474
Vcam1	0.6804123711340206	0.8363636363636363	0.8333333333333334	0.8157894736842105	0.616580310880829	0.8244274809160306	0.5931372549019608	0.7473684210526316
Vip	0.020618556701030927	0.03636363636363636	0.07142857142857142	0.02631578947368421	0.025906735751295335	0.030534351145038167	0.9754901960784313	0.9368421052631579
Whrn	0.4742268041237113	0.2545454545454545	0.39285714285714285	0.2631578947368421	0.5932642487046632	0.3053435114503817	0.25	0.17894736842105263
Wif1	0.7422680412371134	0.7090909090909091	0.6785714285714286	0.7368421052631579	0.616580310880829	0.5572519083969466	0.6666666666666666	0.8105263157894737
Wscd1	0.5257731958762887	0.32727272727272727	0.21428571428571427	0.2631578947368421	0.582901554404145	0.366412213740458	0.2549019607843137	0.21052631578947367
Zcchc12	0.29896907216494845	0.14545454545454545	0.13095238095238096	0.2631578947368421	0.8626943005181347	0.5267175572519084	0.6911764705882353	0.5368421052631579
Zfp36	0.29896907216494845	0.2	0.16666666666666666	0.2631578947368421	0.39896373056994816	0.2824427480916031	0.18627450980392157	0.17894736842105263
Zfp536	0.9278350515463918	0.6545454545454545	0.2976190476190476	0.2894736842105263	0.8316062176165803	0.549618320610687	0.9558823529411765	0.7052631578947368
Zfp804a	0.9175257731958762	0.5272727272727272	0.5952380952380952	0.47368421052631576	0.6994818652849741	0.366412213740458	0.9117647058823529	0.631578947368421
Zfpm2	0.7628865979381443	0.7636363636363637	0.7857142857142857	0.7105263157894737	0.6917098445595855	0.648854961832061	0.7058823529411765	0.7473684210526316
sample_id
