# Supplementary figures and images for: Scaled, high fidelity electrophysiological, morphological, and transcriptomic cell characterization
Source: eLife journal article supplement (doi:10.7554/elife.65482), 2021-08-13

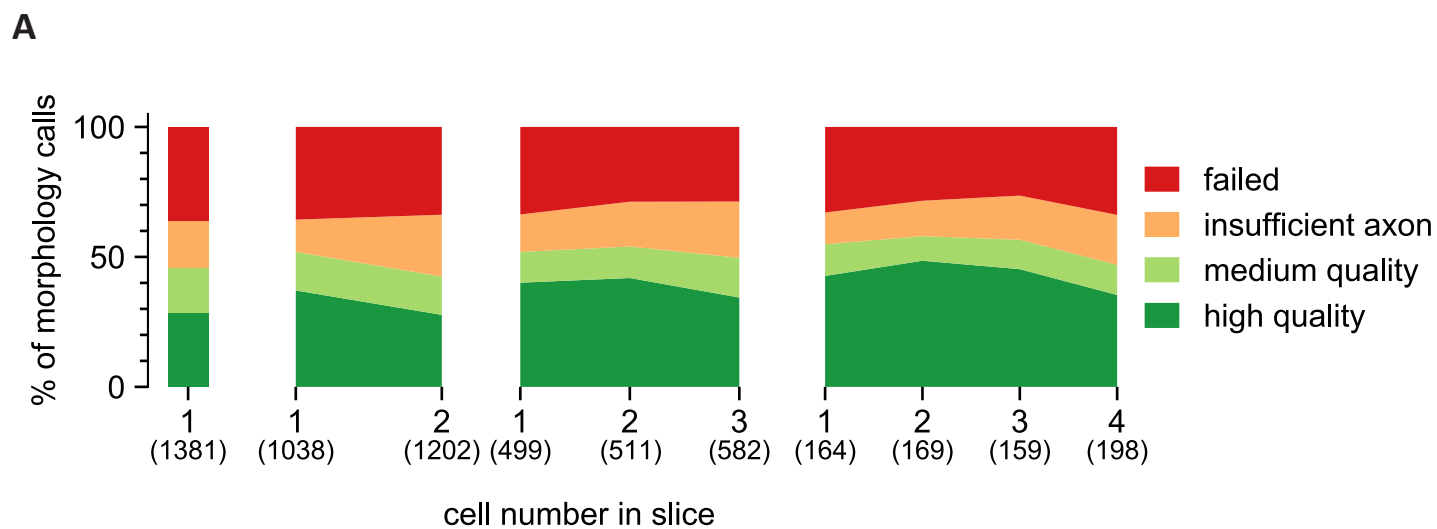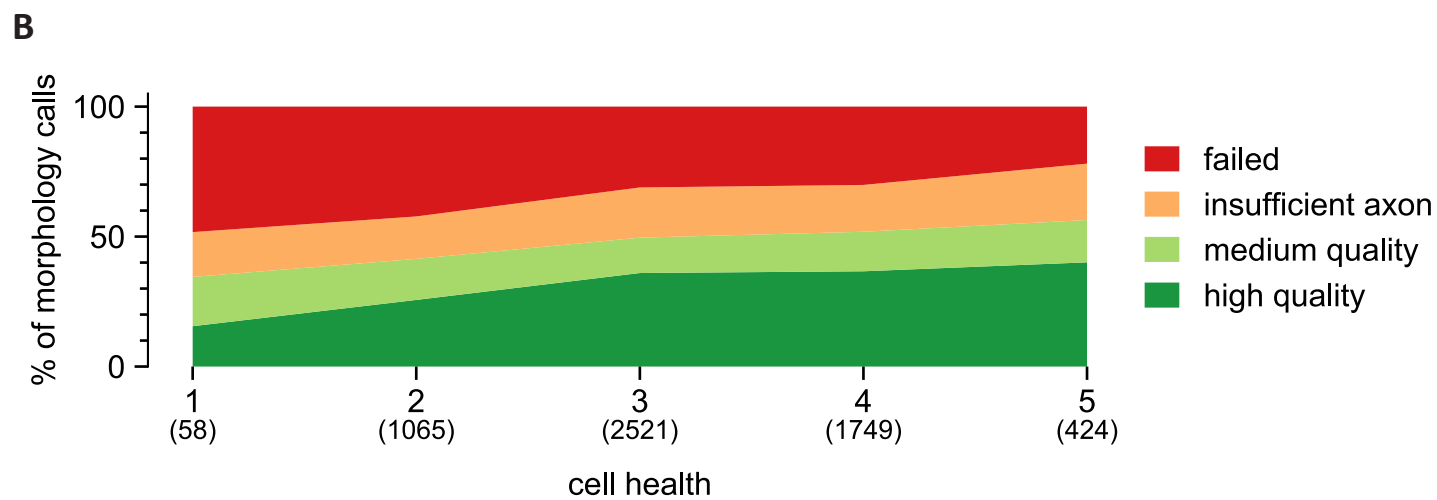

Supplement: supp [file elife-65482-supp-v1.zip]

normalized  
marker sum  $< 0.4$

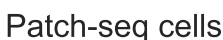

FACS cells

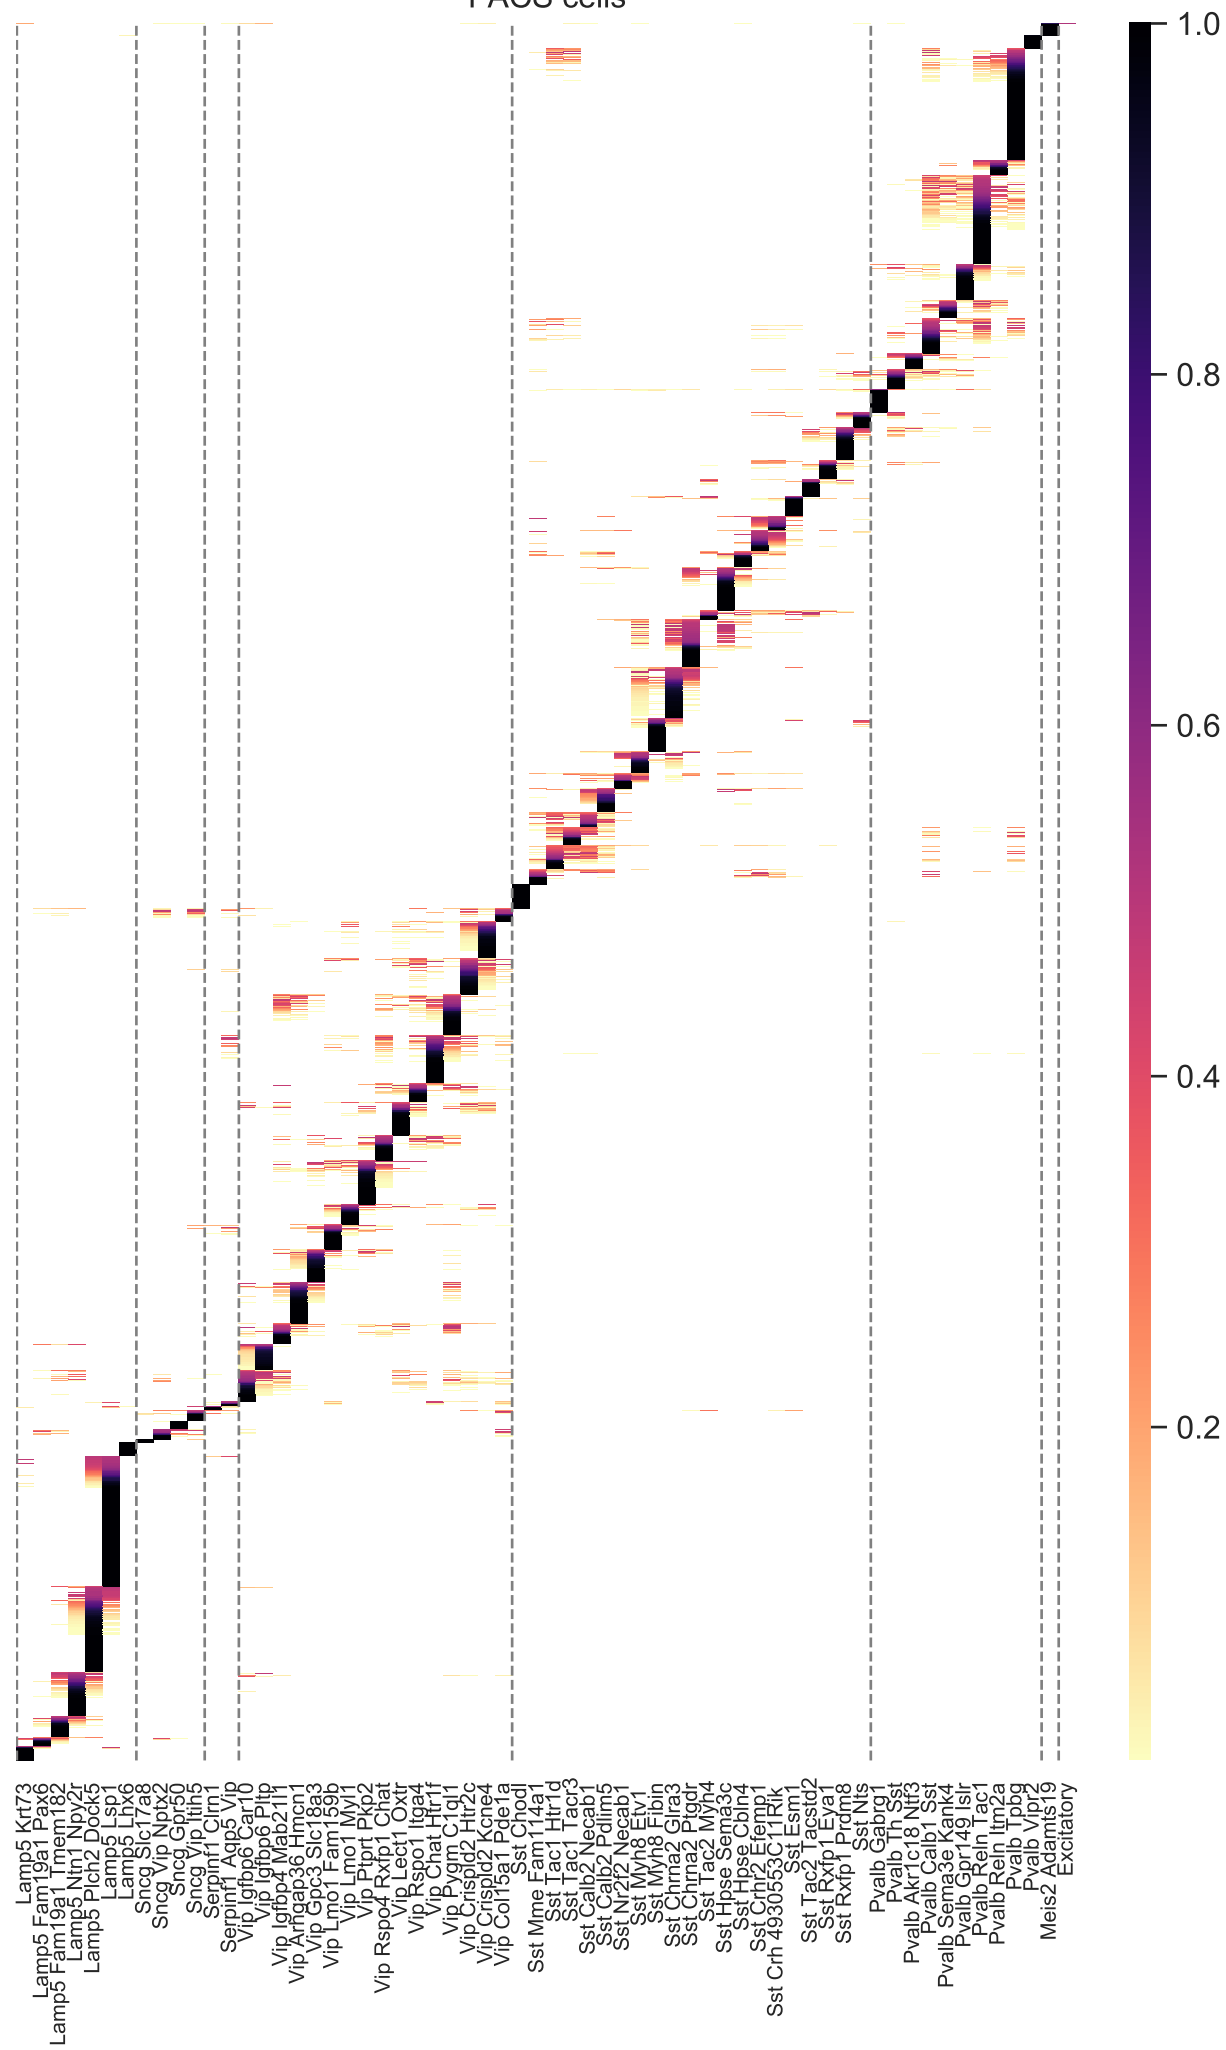

Supplement: supp [file elife-65482-supp-v1.zip]

**A**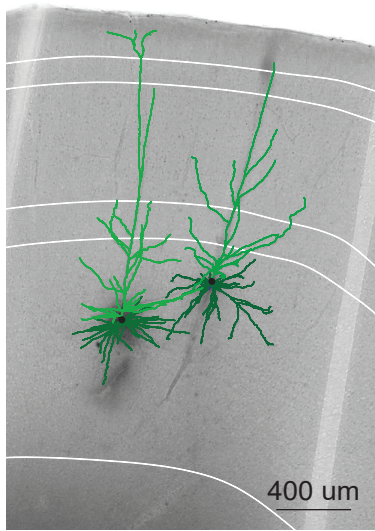**B**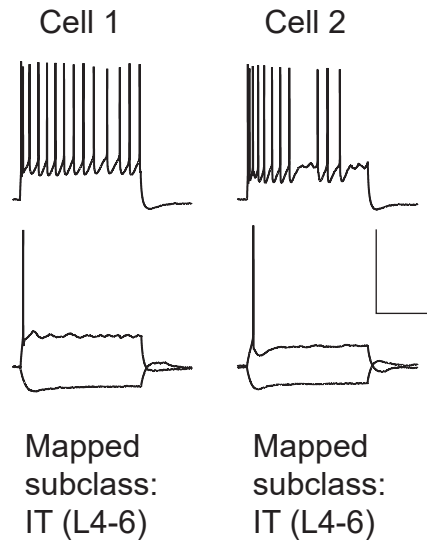**C**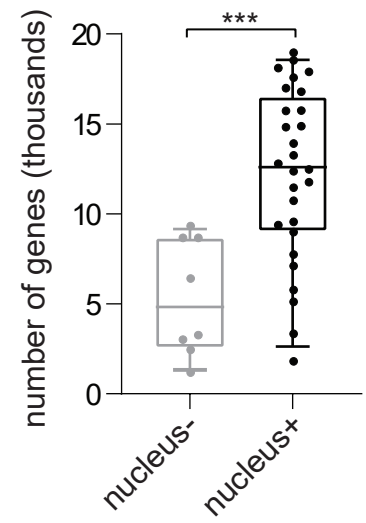

Supplement: supp [file elife-65482-supp-v1.zip]

mouse specimens

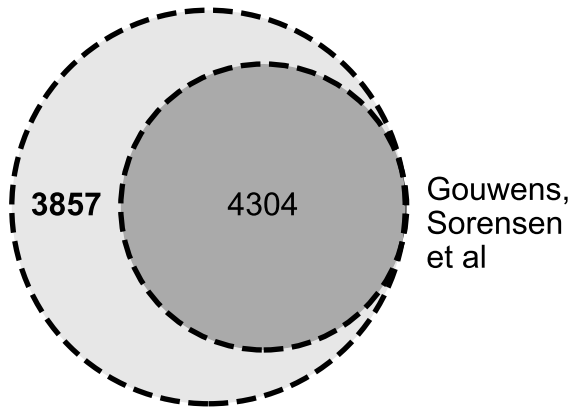

human specimens

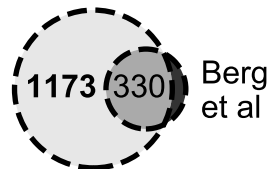

Supplement: supp [file elife-65482-supp-v1.zip]

**A**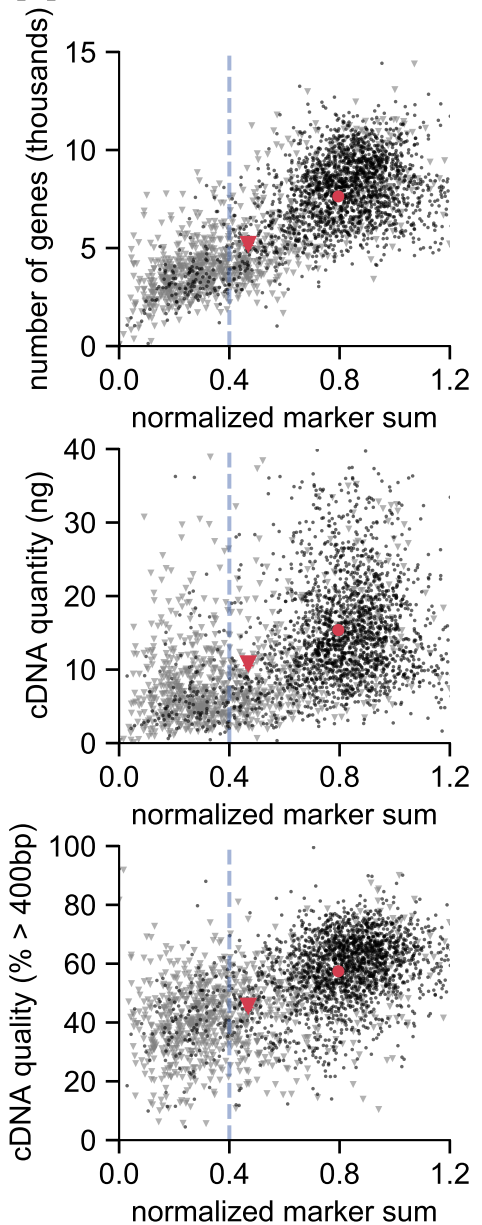

▼ nucleus-      ● nucleus+

**B**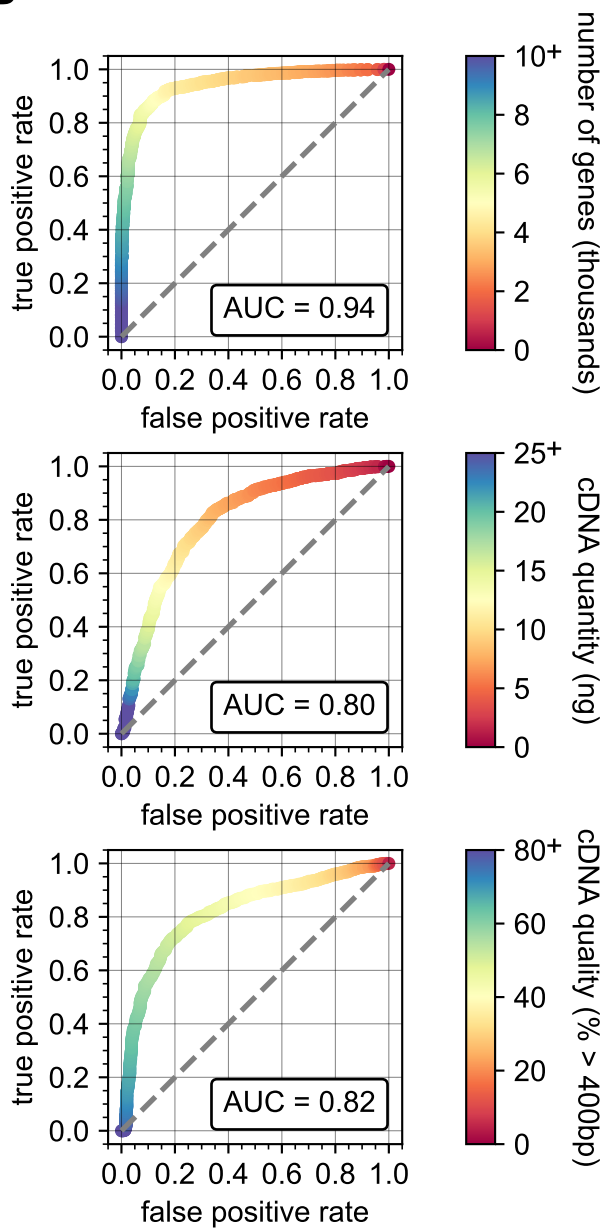

Supplement: supp [file elife-65482-supp-v1.zip]

**A**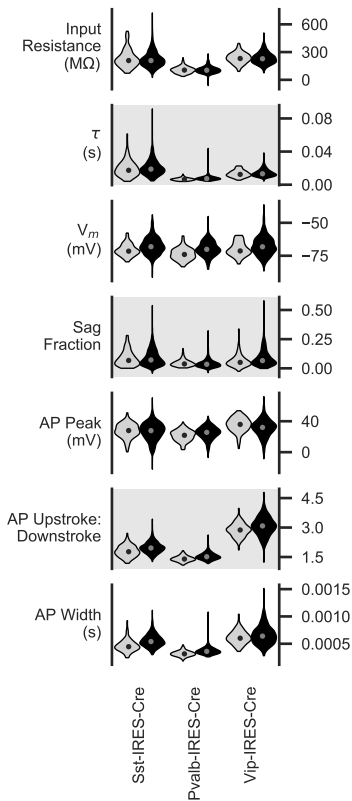**B**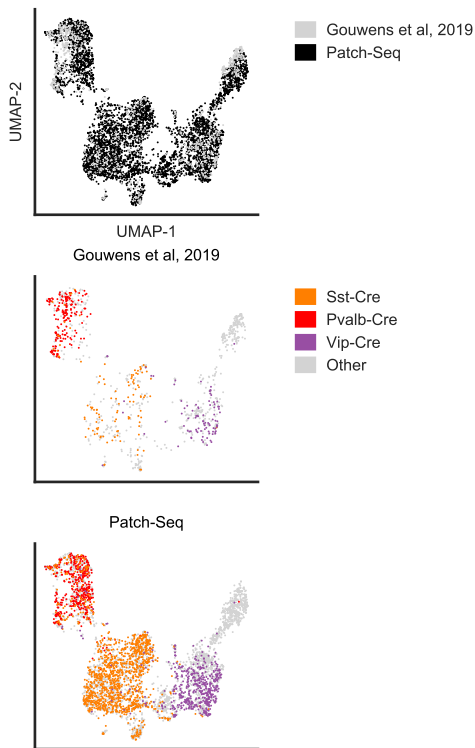

Supplement: supp [file elife-65482-supp-v1.zip]

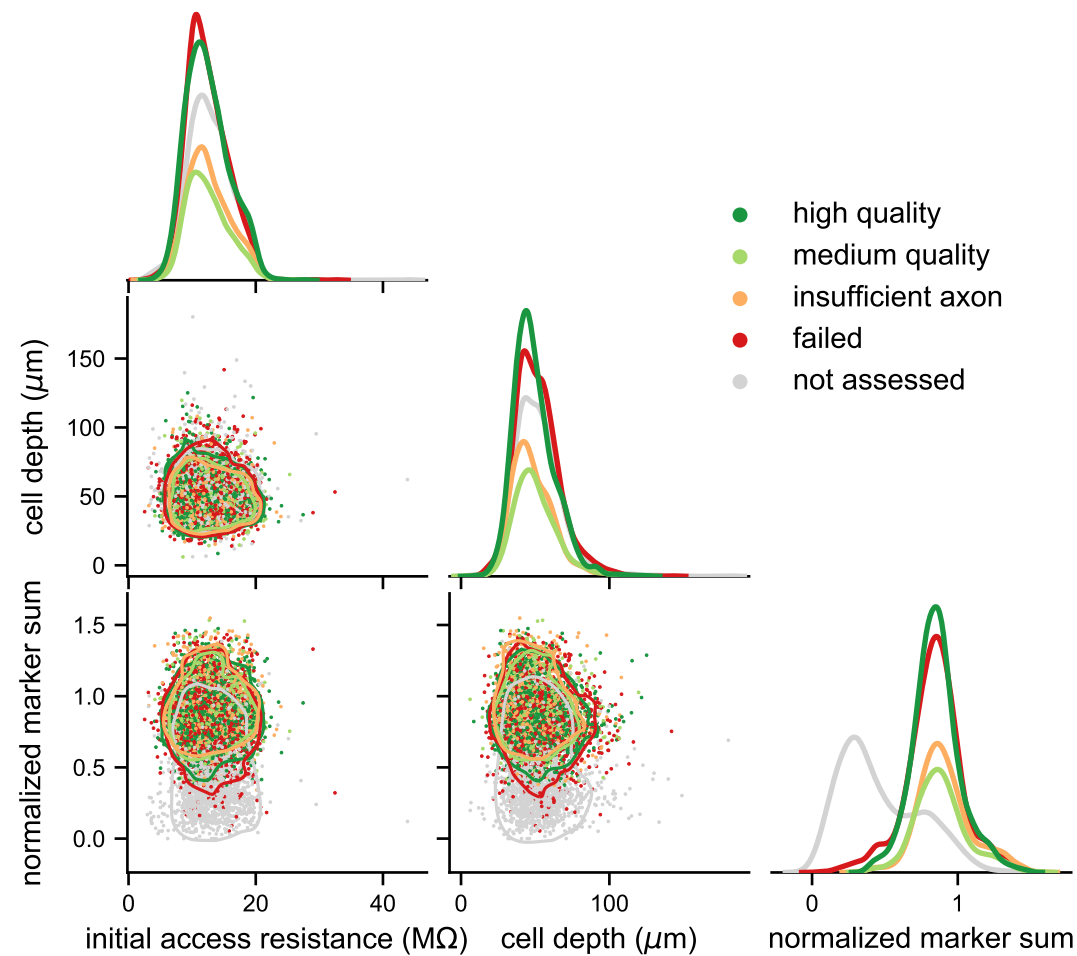

Supplement: supp [file elife-65482-supp-v1.zip]
